# Supplementary material for: Remarkable diversity of vomeronasal type 2 receptor (OlfC) genes of basal ray-finned fish and its evolutionary trajectory in jawed vertebrates
Source: PubMed Central journal article supplement (PMC9018814; doi:10.1038/s41598-022-10428-0), 2022-04-19
Supplement: 41598_2022_10428_MOESM1_ESM.pdf [file 41598_2022_10428_MOESM1_ESM.pdf]

## Supplementary Information

### Remarkable diversity of vomeronasal type 2 receptor (*OlfC*) genes of basal ray-finned fish and its evolutionary trajectory in jawed vertebrates

Zicong Zhang, Atsuhiko Sakuma, Shigehiro Kuraku and Masato Nikaido

**Supplementary Figure S1.** A phylogenetic tree of subfamily “a2” and the cartilaginous fish-specific *V2Rs* constructed using RAxML-NG v.1.0.1 (<https://github.com/amkozlov/raxml-ng>). Note that this subfamily consists of 132 *V2Rs*, most of which were expanded in species-specific birth and death processes. Only one orthologous *V2R* was shared among cartilaginous fish (indicated by asterisk).

**Supplementary Table S1.** Summary of the intact *V2Rs* in the genomes of vertebrates. Gene name, locus (position in the chromosomes, scaffolds), and directions were summarized in a bed file format.

**Supplementary Table S2.** PCR primers used to amplify four *V2R* genes of *Polypterus senegalus*.

**Supplementary File 1.** The aligned *V2R* sequences of all 1897 intact *V2Rs* identified from various vertebrates.

**Supplementary File 2.** The Newick format phylogenetic tree of all 1897 intact *V2Rs* identified from 19 vertebrates.



**Table S1. Summary of the intact V2Rs in the genomes of vertebrates. Gene name, locus (position in the chromosomes, scaffolds), and directions were summarized in a bed file format.**

**Elephant\_shark**

|            |          |          |            |        |   |          |          |         |   |      |   |
|------------|----------|----------|------------|--------|---|----------|----------|---------|---|------|---|
| KI635855.1 | 8113726  | 8114764  | locus2.1   | 848.45 | - | 8113726  | 8114764  | 0,0,255 | 1 | 1038 | 0 |
| KI635855.1 | 8119816  | 8120716  | locus3.1   | 742.45 | - | 8119816  | 8120716  | 0,0,255 | 1 | 900  | 0 |
| KI635855.1 | 8177093  | 8178050  | locus12.1  | 797.41 | - | 8177093  | 8178050  | 0,0,255 | 1 | 957  | 0 |
| KI635855.1 | 8192636  | 8193665  | locus14.1  | 843.28 | - | 8192636  | 8193665  | 0,0,255 | 1 | 1029 | 0 |
| KI635855.1 | 8227763  | 8228576  | locus22.1  | 669.02 | - | 8227763  | 8228576  | 0,0,255 | 1 | 813  | 0 |
| KI635855.1 | 8240920  | 8241826  | locus23.1  | 735.32 | + | 8240920  | 8241826  | 0,0,255 | 1 | 906  | 0 |
| KI635855.1 | 17102292 | 17103270 | locus27.1  | 793.77 | - | 17102292 | 17103270 | 0,0,255 | 1 | 978  | 0 |
| KI635855.1 | 17115829 | 17116807 | locus28.1  | 792.8  | - | 17115829 | 17116807 | 0,0,255 | 1 | 978  | 0 |
| KI635855.1 | 17233500 | 17234400 | locus29.1  | 742.05 | + | 17233500 | 17234400 | 0,0,255 | 1 | 900  | 0 |
| KI635855.1 | 17241521 | 17242424 | locus30.1  | 745.96 | + | 17241521 | 17242424 | 0,0,255 | 1 | 903  | 0 |
| KI635855.1 | 17252805 | 17253687 | locus31.1  | 733.15 | + | 17252805 | 17253687 | 0,0,255 | 1 | 882  | 0 |
| KI635949.1 | 2150304  | 2151231  | locus140.1 | 760.16 | - | 2150304  | 2151231  | 0,0,255 | 1 | 927  | 0 |
| KI636120.1 | 1422     | 2370     | locus174.1 | 789.26 | + | 1422     | 2370     | 0,0,255 | 1 | 948  | 0 |
| KI636120.1 | 134939   | 135887   | locus176.1 | 790.01 | + | 134939   | 135887   | 0,0,255 | 1 | 948  | 0 |
| KI636120.1 | 145558   | 146461   | locus177.1 | 750.83 | + | 145558   | 146461   | 0,0,255 | 1 | 903  | 0 |
| KI636120.1 | 153579   | 154395   | locus178.1 | 669.82 | + | 153579   | 154395   | 0,0,255 | 1 | 816  | 0 |
| KI636120.1 | 160538   | 161528   | locus179.1 | 819.89 | + | 160538   | 161528   | 0,0,255 | 1 | 990  | 0 |
| KI636120.1 | 170622   | 171534   | locus180.1 | 751.98 | + | 170622   | 171534   | 0,0,255 | 1 | 912  | 0 |
| KI636120.1 | 387729   | 388536   | locus182.1 | 659.2  | - | 387729   | 388536   | 0,0,255 | 1 | 807  | 0 |
| KI636613.1 | 1773     | 2580     | locus191.1 | 742.52 | - | 1773     | 2580     | 0,0,255 | 1 | 807  | 0 |

|            |       |                  |          |       |               |   |     |   |
|------------|-------|------------------|----------|-------|---------------|---|-----|---|
| KI636613.1 | 10429 | 11227 locus192.1 | 656.84 - | 10429 | 11227 0,0,255 | 1 | 798 | 0 |
| KI636613.1 | 26870 | 27686 locus193.1 | 671.53 - | 26870 | 27686 0,0,255 | 1 | 816 | 0 |
| KI636730.1 | 18084 | 18972 locus194.1 | 734.37 + | 18084 | 18972 0,0,255 | 1 | 888 | 0 |
| KI637190.1 | 13622 | 14435 locus202.1 | 759.66 + | 13622 | 14435 0,0,255 | 1 | 813 | 0 |
| KI637259.1 | 1855  | 2761 locus206.1  | 742.5 -  | 1855  | 2761 0,0,255  | 1 | 906 | 0 |
| KI637457.1 | 7146  | 7953 locus212.1  | 749.02 - | 7146  | 7953 0,0,255  | 1 | 807 | 0 |
| AAVX020441 | 1726  | 2539 locus203.1  | 763.66 + | 1726  | 2539 0,0,255  | 1 | 813 | 0 |
| AAVX020477 | 5736  | 6549 locus223.1  | 752.16 + | 5736  | 6549 0,0,255  | 1 | 813 | 0 |

---

**Small-eyed\_rabbitfish**

|                  |      |       |            |          |      |       |         |   |         |        |
|------------------|------|-------|------------|----------|------|-------|---------|---|---------|--------|
| JAILG010023761.1 | 7699 | 8602  | locus128.1 | 604.77 - | 7699 | 8602  | 0,0,255 | 1 | 903     | 0      |
| JAILG010115746.1 | 0    | 840   | locus500.1 | 606.08 - | 0    | 840   | 0,0,255 | 1 | 840     | 0      |
| JAILG010055919.1 | 747  | 1792  | locus322.1 | 609.36 + | 747  | 1792  | 0,0,255 | 2 | 274,755 | 0,290  |
| JAILG010059427.1 | 1243 | 2146  | locus332.1 | 593.78 - | 1243 | 2146  | 0,0,255 | 1 | 903     | 0      |
| JAILG010064328.1 | 344  | 1385  | locus355.1 | 619.77 - | 344  | 1385  | 0,0,255 | 1 | 1041    | 0      |
| JAILG010015209.1 | 3558 | 4599  | locus69.1  | 614.77 - | 3558 | 4599  | 0,0,255 | 1 | 1041    | 0      |
| JAILG010072115.1 | 1336 | 2239  | locus376.1 | 643.25 - | 1336 | 2239  | 0,0,255 | 1 | 903     | 0      |
| JAILG010181541.1 | 0    | 717   | locus651.1 | 522.45 + | 0    | 717   | 0,0,255 | 1 | 717     | 0      |
| JAILG010021320.1 | 2785 | 3790  | locus110.1 | 625.21 + | 2785 | 3790  | 0,0,255 | 1 | 1005    | 0      |
| JAILG010169968.1 | 2    | 743   | locus629.1 | 567.5 +  | 2    | 743   | 0,0,255 | 1 | 741     | 0      |
| JAILG010025835.1 | 7080 | 8013  | locus138.1 | 587.29 + | 7080 | 8013  | 0,0,255 | 1 | 933     | 0      |
| JAILG010047614.1 | 3306 | 4197  | locus291.1 | 531.82 + | 3306 | 4197  | 0,0,255 | 1 | 891     | 0      |
| JAILG010076904.1 | 196  | 1096  | locus396.1 | 643.25 + | 196  | 1096  | 0,0,255 | 1 | 900     | 0      |
| JAILG010163260.1 | 2    | 815   | locus613.1 | 579.76 - | 2    | 815   | 0,0,255 | 1 | 813     | 0      |
| JAILG010050407.1 | 0    | 852   | locus302.1 | 568.11 + | 0    | 852   | 0,0,255 | 1 | 852     | 0      |
| JAILG010036036.1 | 3007 | 4064  | locus226.1 | 604.91 - | 3007 | 4064  | 0,0,255 | 2 | 882,24  | 0,1033 |
| JAILG010068946.1 | 474  | 1614  | locus366.1 | 615.26 - | 474  | 1614  | 0,0,255 | 1 | 1140    | 0      |
| JAILG010032669.1 | 1    | 676   | locus209.1 | 515.88 + | 1    | 676   | 0,0,255 | 1 | 675     | 0      |
| JAILG010013374.1 | 9399 | 10308 | locus60.1  | 588.39 - | 9399 | 10308 | 0,0,255 | 1 | 909     | 0      |
| JAILG010010345.1 | 9179 | 10082 | locus48.1  | 622.76 + | 9179 | 10082 | 0,0,255 | 1 | 903     | 0      |
| JAILG010036747.1 | 1425 | 2385  | locus232.1 | 628.76 + | 1425 | 2385  | 0,0,255 | 1 | 960     | 0      |
| JAILG010043639.1 | 3949 | 4756  | locus263.1 | 550.51 - | 3949 | 4756  | 0,0,255 | 1 | 807     | 0      |
| JAILG010030383.1 | 2    | 812   | locus179.1 | 546.14 + | 2    | 812   | 0,0,255 | 1 | 810     | 0      |

|                  |       |       |            |          |       |       |         |   |           |            |
|------------------|-------|-------|------------|----------|-------|-------|---------|---|-----------|------------|
| JAILG010119096.1 | 1     | 946   | locus519.1 | 562.42 + | 1     | 946   | 0,0,255 | 1 | 945       | 0          |
| JAILG010126192.1 | 70    | 1072  | locus539.1 | 586.77 - | 70    | 1072  | 0,0,255 | 1 | 1002      | 0          |
| JAILG010058509.1 | 15    | 786   | locus330.1 | 535.47 + | 15    | 786   | 0,0,255 | 1 | 771       | 0          |
| JAILG010018604.1 | 329   | 1187  | locus95.1  | 521.4 -  | 329   | 1187  | 0,0,255 | 1 | 858       | 0          |
| JAILG010077329.1 | 0     | 813   | locus401.1 | 545.63 + | 0     | 813   | 0,0,255 | 1 | 813       | 0          |
| JAILG010042405.1 | 110   | 1301  | locus257.1 | 612.99 + | 110   | 1301  | 0,0,255 | 3 | 24,830,37 | 0,156,1154 |
| JAILG010017782.1 | 7477  | 8284  | locus83.1  | 645.51 - | 7477  | 8284  | 0,0,255 | 1 | 807       | 0          |
| JAILG010007213.1 | 1158  | 2106  | locus29.1  | 672.75 - | 1158  | 2106  | 0,0,255 | 1 | 948       | 0          |
| JAILG010007213.1 | 8266  | 9169  | locus30.1  | 527.08 - | 8266  | 9169  | 0,0,255 | 1 | 903       | 0          |
| JAILG010007213.1 | 23226 | 24129 | locus32.1  | 602.92 - | 23226 | 24129 | 0,0,255 | 1 | 903       | 0          |
| JAILG010028109.1 | 8313  | 9108  | locus163.1 | 607.02 + | 8313  | 9108  | 0,0,255 | 1 | 795       | 0          |
| JAILG010007213.1 | 15424 | 16327 | locus31.1  | 661.2 -  | 15424 | 16327 | 0,0,255 | 1 | 903       | 0          |
| JAILG010034634.1 | 0     | 720   | locus218.1 | 628.84 - | 0     | 720   | 0,0,255 | 1 | 720       | 0          |
| JAILG010006824.1 | 23636 | 24434 | locus25.1  | 567.52 + | 23636 | 24434 | 0,0,255 | 1 | 798       | 0          |
| JAILG010006824.1 | 9779  | 10721 | locus24.1  | 653.62 + | 9779  | 10721 | 0,0,255 | 1 | 942       | 0          |
| JAILG010022906.1 | 393   | 1185  | locus115.1 | 667.73 - | 393   | 1185  | 0,0,255 | 1 | 792       | 0          |
| JAILG010013651.1 | 13704 | 14709 | locus64.1  | 663.87 + | 13704 | 14709 | 0,0,255 | 1 | 1005      | 0          |
| JAILG010014301.1 | 11755 | 12670 | locus66.1  | 597.55 - | 11755 | 12670 | 0,0,255 | 1 | 915       | 0          |

**Cloudy\_catshark**

---

|                |        |        |           |         |   |        |        |         |   |      |   |
|----------------|--------|--------|-----------|---------|---|--------|--------|---------|---|------|---|
| BFAA01000307.1 | 373103 | 374000 | locus7.1  | 742.33  | + | 373103 | 374000 | 0,0,255 | 1 | 897  | 0 |
| BFAA01000307.1 | 381643 | 382540 | locus8.1  | 744.04  | - | 381643 | 382540 | 0,0,255 | 1 | 897  | 0 |
| BFAA01000307.1 | 420820 | 421711 | locus10.1 | 732.32  | - | 420820 | 421711 | 0,0,255 | 1 | 891  | 0 |
| BFAA01000307.1 | 502254 | 503061 | locus12.1 | 660.24  | - | 502254 | 503061 | 0,0,255 | 1 | 807  | 0 |
| BFAA01000307.1 | 575562 | 576369 | locus14.1 | 661.03  | - | 575562 | 576369 | 0,0,255 | 1 | 807  | 0 |
| BFAA01000307.1 | 612935 | 613727 | locus15.1 | 646.05  | - | 612935 | 613727 | 0,0,255 | 1 | 792  | 0 |
| BFAA01001691.1 | 123489 | 124302 | locus39.1 | 676.81  | - | 123489 | 124302 | 0,0,255 | 1 | 813  | 0 |
| BFAA01001691.1 | 152837 | 153758 | locus40.1 | 769.15  | - | 152837 | 153758 | 0,0,255 | 1 | 921  | 0 |
| BFAA01001691.1 | 185319 | 186114 | locus41.1 | 661.49  | + | 185319 | 186114 | 0,0,255 | 1 | 795  | 0 |
| BFAA01001691.1 | 206554 | 207274 | locus42.1 | 590.43  | + | 206554 | 207274 | 0,0,255 | 1 | 720  | 0 |
| BFAA01001691.1 | 250024 | 250924 | locus43.1 | 748.43  | + | 250024 | 250924 | 0,0,255 | 1 | 900  | 0 |
| BFAA01001691.1 | 267255 | 268047 | locus44.1 | 657.03  | - | 267255 | 268047 | 0,0,255 | 1 | 792  | 0 |
| BFAA01001691.1 | 311246 | 312044 | locus45.1 | 662.84  | - | 311246 | 312044 | 0,0,255 | 1 | 798  | 0 |
| BFAA01001691.1 | 352153 | 353116 | locus47.1 | 798.92  | - | 352153 | 353116 | 0,0,255 | 1 | 963  | 0 |
| BFAA01002101.1 | 33077  | 33890  | locus53.1 | 670.41  | + | 33077  | 33890  | 0,0,255 | 1 | 813  | 0 |
| BFAA01002101.1 | 87681  | 88575  | locus54.1 | 740.75  | + | 87681  | 88575  | 0,0,255 | 1 | 894  | 0 |
| BFAA01004758.1 | 192202 | 193105 | locus65.1 | 745.41  | + | 192202 | 193105 | 0,0,255 | 1 | 903  | 0 |
| BFAA01008259.1 | 16048  | 16942  | locus76.1 | 746.63  | - | 16048  | 16942  | 0,0,255 | 1 | 894  | 0 |
| BFAA01008259.1 | 53813  | 55076  | locus77.1 | 1038.67 | - | 53813  | 55076  | 0,0,255 | 1 | 1263 | 0 |
| BFAA01008259.1 | 83740  | 84511  | locus78.1 | 631.29  | - | 83740  | 84511  | 0,0,255 | 1 | 771  | 0 |
| BFAA01008733.1 | 38466  | 39354  | locus79.1 | 714.45  | + | 38466  | 39354  | 0,0,255 | 1 | 888  | 0 |
| BFAA01012745.1 | 7247   | 8267   | locus87.1 | 820.73  | - | 7247   | 8267   | 0,0,255 | 1 | 1020 | 0 |
| BFAA01013518.1 | 10111  | 10996  | locus91.1 | 734.91  | + | 10111  | 10996  | 0,0,255 | 1 | 885  | 0 |

---

**Great\_white\_shark**

---

|                |         |         |           |          |         |         |         |   |     |   |
|----------------|---------|---------|-----------|----------|---------|---------|---------|---|-----|---|
| QUOW01000919.1 | 4438299 | 4439199 | locus10.1 | 724.65 + | 4438299 | 4439199 | 0,0,255 | 1 | 900 | 0 |
| QUOW01000919.1 | 4483961 | 4484849 | locus11.1 | 709.15 + | 4483961 | 4484849 | 0,0,255 | 1 | 888 | 0 |
| QUOW01001159.1 | 1331958 | 1332810 | locus17.1 | 707.47 - | 1331958 | 1332810 | 0,0,255 | 1 | 852 | 0 |
| QUOW01001159.1 | 1833390 | 1834329 | locus18.1 | 775 -    | 1833390 | 1834329 | 0,0,255 | 1 | 939 | 0 |
| QUOW01001159.1 | 1869177 | 1870107 | locus19.1 | 766.41 - | 1869177 | 1870107 | 0,0,255 | 1 | 930 | 0 |
| QUOW01001159.1 | 1899640 | 1900639 | locus20.1 | 827.63 - | 1899640 | 1900639 | 0,0,255 | 1 | 999 | 0 |
| QUOW01001159.1 | 1959492 | 1960395 | locus22.1 | 743.75 - | 1959492 | 1960395 | 0,0,255 | 1 | 903 | 0 |
| QUOW01001159.1 | 2812522 | 2813326 | locus25.1 | 657.98 + | 2812522 | 2813326 | 0,0,255 | 1 | 804 | 0 |
| QUOW01001159.1 | 2927235 | 2928186 | locus29.1 | 787.58 - | 2927235 | 2928186 | 0,0,255 | 1 | 951 | 0 |
| QUOW01001159.1 | 2956131 | 2957067 | locus31.1 | 782.69 + | 2956131 | 2957067 | 0,0,255 | 1 | 936 | 0 |
| QUOW01001159.1 | 2971974 | 2972874 | locus32.1 | 749.9 +  | 2971974 | 2972874 | 0,0,255 | 1 | 900 | 0 |
| QUOW01001159.1 | 3010165 | 3010981 | locus33.1 | 671.94 - | 3010165 | 3010981 | 0,0,255 | 1 | 816 | 0 |
| QUOW01001159.1 | 3042198 | 3043008 | locus34.1 | 661.25 - | 3042198 | 3043008 | 0,0,255 | 1 | 810 | 0 |
| QUOW01001159.1 | 3094851 | 3095781 | locus35.1 | 769.27 + | 3094851 | 3095781 | 0,0,255 | 1 | 930 | 0 |

---



**Whale\_shark**

---

|                |        |        |            |          |        |        |         |   |      |   |
|----------------|--------|--------|------------|----------|--------|--------|---------|---|------|---|
| LVEK02000002.1 | 86491  | 87304  | locus2.1   | 674.97 - | 86491  | 87304  | 0,0,255 | 1 | 813  | 0 |
| LVEK02000776.1 | 6938   | 7745   | locus9.1   | 652.74 - | 6938   | 7745   | 0,0,255 | 1 | 807  | 0 |
| LVEK02002323.1 | 78960  | 79698  | locus20.1  | 482.54 - | 78960  | 79698  | 0,0,255 | 1 | 738  | 0 |
| LVEK02002323.1 | 131462 | 132272 | locus21.1  | 663.66 + | 131462 | 132272 | 0,0,255 | 1 | 810  | 0 |
| LVEK02002323.1 | 148000 | 148876 | locus22.1  | 716.51 + | 148000 | 148876 | 0,0,255 | 1 | 876  | 0 |
| LVEK02002323.1 | 168028 | 168928 | locus23.1  | 745.34 - | 168028 | 168928 | 0,0,255 | 1 | 900  | 0 |
| LVEK02002323.1 | 193877 | 194678 | locus24.1  | 665.7 -  | 193877 | 194678 | 0,0,255 | 1 | 801  | 0 |
| LVEK02014336.1 | 34850  | 35867  | locus36.1  | 815.4 -  | 34850  | 35867  | 0,0,255 | 1 | 1017 | 0 |
| LVEK02019665.1 | 27856  | 28753  | locus49.1  | 750.31 + | 27856  | 28753  | 0,0,255 | 1 | 897  | 0 |
| LVEK02029290.1 | 13908  | 14739  | locus56.1  | 691.32 - | 13908  | 14739  | 0,0,255 | 1 | 831  | 0 |
| LVEK02029290.1 | 22329  | 23130  | locus57.1  | 657.15 - | 22329  | 23130  | 0,0,255 | 1 | 801  | 0 |
| LVEK02029290.1 | 34843  | 35677  | locus58.1  | 680.59 - | 34843  | 35677  | 0,0,255 | 1 | 834  | 0 |
| LVEK02029290.1 | 78214  | 79030  | locus61.1  | 682.6 +  | 78214  | 79030  | 0,0,255 | 1 | 816  | 0 |
| LVEK02029290.1 | 102240 | 103086 | locus62.1  | 702.1 +  | 102240 | 103086 | 0,0,255 | 1 | 846  | 0 |
| LVEK02029290.1 | 139969 | 140770 | locus64.1  | 659.99 + | 139969 | 140770 | 0,0,255 | 1 | 801  | 0 |
| LVEK02029290.1 | 208421 | 209234 | locus68.1  | 676.47 + | 208421 | 209234 | 0,0,255 | 1 | 813  | 0 |
| LVEK02029292.1 | 77897  | 78809  | locus77.1  | 768.43 - | 77897  | 78809  | 0,0,255 | 1 | 912  | 0 |
| LVEK02029292.1 | 117038 | 117833 | locus79.1  | 725.49 - | 117038 | 117833 | 0,0,255 | 1 | 795  | 0 |
| LVEK02042295.1 | 21726  | 22614  | locus98.1  | 709.9 -  | 21726  | 22614  | 0,0,255 | 1 | 888  | 0 |
| LVEK02047597.1 | 15668  | 16601  | locus103.1 | 781.08 - | 15668  | 16601  | 0,0,255 | 1 | 933  | 0 |
| LVEK02047597.1 | 59769  | 60666  | locus106.1 | 749.69 - | 59769  | 60666  | 0,0,255 | 1 | 897  | 0 |
| LVEK02047597.1 | 91482  | 92457  | locus109.1 | 810.72 - | 91482  | 92457  | 0,0,255 | 1 | 975  | 0 |

---

**Brownbanded\_bambooshark**

|                   |          |          |             |        |   |          |          |         |   |      |   |
|-------------------|----------|----------|-------------|--------|---|----------|----------|---------|---|------|---|
| ccg_chipu00000014 | 16653850 | 16654837 | locus518.1  | 819.81 | - | 16653850 | 16654837 | 0,0,255 | 1 | 987  | 0 |
| ccg_chipu00000014 | 17030173 | 17031091 | locus519.1  | 748.83 | + | 17030173 | 17031091 | 0,0,255 | 1 | 918  | 0 |
| ccg_chipu00000014 | 17087991 | 17088975 | locus520.1  | 802.18 | + | 17087991 | 17088975 | 0,0,255 | 1 | 984  | 0 |
| ccg_chipu00000066 | 9822515  | 9823544  | locus1554.1 | 856.39 | + | 9822515  | 9823544  | 0,0,255 | 1 | 1029 | 0 |
| ccg_chipu00000066 | 9842281  | 9843094  | locus1555.1 | 675.68 | - | 9842281  | 9843094  | 0,0,255 | 1 | 813  | 0 |
| ccg_chipu00000066 | 9914503  | 9915334  | locus1560.1 | 689.82 | - | 9914503  | 9915334  | 0,0,255 | 1 | 831  | 0 |
| ccg_chipu00000066 | 9931637  | 9932597  | locus1562.1 | 800.74 | - | 9931637  | 9932597  | 0,0,255 | 1 | 960  | 0 |
| ccg_chipu00000066 | 9955952  | 9956888  | locus1564.1 | 777.09 | - | 9955952  | 9956888  | 0,0,255 | 1 | 936  | 0 |
| ccg_chipu00000066 | 10051002 | 10051998 | locus1570.1 | 827.6  | - | 10051002 | 10051998 | 0,0,255 | 1 | 996  | 0 |
| ccg_chipu00000066 | 10099547 | 10100489 | locus1573.1 | 786.17 | - | 10099547 | 10100489 | 0,0,255 | 1 | 942  | 0 |
| ccg_chipu00000066 | 10132160 | 10132985 | locus1576.1 | 696.93 | + | 10132160 | 10132985 | 0,0,255 | 1 | 825  | 0 |
| ccg_chipu00000066 | 10197679 | 10198486 | locus1583.1 | 787.25 | + | 10197679 | 10198486 | 0,0,255 | 1 | 807  | 0 |
| ccg_chipu00000066 | 10234631 | 10235486 | locus1585.1 | 740.89 | + | 10234631 | 10235486 | 0,0,255 | 1 | 855  | 0 |
| ccg_chipu00000066 | 10280061 | 10280892 | locus1588.1 | 805.45 | + | 10280061 | 10280892 | 0,0,255 | 1 | 831  | 0 |
| ccg_chipu00000066 | 10373096 | 10374056 | locus1595.1 | 798.17 | - | 10373096 | 10374056 | 0,0,255 | 1 | 960  | 0 |
| ccg_chipu00000066 | 10405846 | 10406776 | locus1597.1 | 782.16 | - | 10405846 | 10406776 | 0,0,255 | 1 | 930  | 0 |
| ccg_chipu00000066 | 10445892 | 10446786 | locus1599.1 | 736.24 | + | 10445892 | 10446786 | 0,0,255 | 1 | 894  | 0 |
| ccg_chipu00000066 | 11225393 | 11226296 | locus1601.1 | 741.09 | - | 11225393 | 11226296 | 0,0,255 | 1 | 903  | 0 |
| ccg_chipu00000066 | 11279302 | 11280139 | locus1603.1 | 688.28 | + | 11279302 | 11280139 | 0,0,255 | 1 | 837  | 0 |
| ccg_chipu00000066 | 11367106 | 11368003 | locus1611.1 | 749.49 | + | 11367106 | 11368003 | 0,0,255 | 1 | 897  | 0 |
| ccg_chipu00000066 | 11407717 | 11408596 | locus1614.1 | 736.64 | + | 11407717 | 11408596 | 0,0,255 | 1 | 879  | 0 |
| ccg_chipu00000066 | 11886330 | 11887143 | locus1619.1 | 673.85 | + | 11886330 | 11887143 | 0,0,255 | 1 | 813  | 0 |
| ccg_chipu00000066 | 11916072 | 11916963 | locus1620.1 | 743.73 | + | 11916072 | 11916963 | 0,0,255 | 1 | 891  | 0 |

|                   |        |        |             |          |        |        |         |   |        |       |
|-------------------|--------|--------|-------------|----------|--------|--------|---------|---|--------|-------|
| ccg_chipu00000105 | 698011 | 698893 | locus1998.1 | 727.07 - | 698011 | 698893 | 0,0,255 | 1 | 882    | 0     |
| ccg_chipu00000105 | 755174 | 756184 | locus2000.1 | 630.26 - | 755174 | 756184 | 0,0,255 | 2 | 773,40 | 0,970 |
| ccg_chipu00000105 | 777718 | 778645 | locus2001.1 | 757.73 - | 777718 | 778645 | 0,0,255 | 1 | 927    | 0     |

---

**Little\_skate**

---

|                 |      |      |           |          |      |      |         |   |     |   |
|-----------------|------|------|-----------|----------|------|------|---------|---|-----|---|
| AESE010035648.1 | 314  | 1205 | locus4.1  | 733.91 - | 314  | 1205 | 0,0,255 | 1 | 891 | 0 |
| AESE010036109.1 | 70   | 988  | locus5.1  | 740.6 +  | 70   | 988  | 0,0,255 | 1 | 918 | 0 |
| AESE010044841.1 | 1830 | 2760 | locus7.1  | 770.64 - | 1830 | 2760 | 0,0,255 | 1 | 930 | 0 |
| AESE010104795.1 | 31   | 967  | locus14.1 | 776.12 - | 31   | 967  | 0,0,255 | 1 | 936 | 0 |
| AESE010131607.1 | 198  | 1011 | locus16.1 | 664.49 + | 198  | 1011 | 0,0,255 | 1 | 813 | 0 |
| AESE011510678.1 | 449  | 1421 | locus49.1 | 792.79 - | 449  | 1421 | 0,0,255 | 1 | 972 | 0 |
| AESE011557639.1 | 103  | 1003 | locus52.1 | 756.07 - | 103  | 1003 | 0,0,255 | 1 | 900 | 0 |
| AESE011619611.1 | 1005 | 1899 | locus54.1 | 735.42 + | 1005 | 1899 | 0,0,255 | 1 | 894 | 0 |

---

**Thorny\_skate**

---

|             |          |          |           |          |          |          |         |   |     |   |
|-------------|----------|----------|-----------|----------|----------|----------|---------|---|-----|---|
| scaffold_16 | 12510531 | 12511359 | locus23.1 | 668.39 - | 12510531 | 12511359 | 0,0,255 | 1 | 828 | 0 |
| scaffold_16 | 12541614 | 12542532 | locus24.1 | 741.46 - | 12541614 | 12542532 | 0,0,255 | 1 | 918 | 0 |
| scaffold_16 | 12736487 | 12737378 | locus25.1 | 733.91 + | 12736487 | 12737378 | 0,0,255 | 1 | 891 | 0 |
| scaffold_16 | 34257392 | 34258286 | locus26.1 | 735.65 - | 34257392 | 34258286 | 0,0,255 | 1 | 894 | 0 |
| scaffold_16 | 35960327 | 35961227 | locus27.1 | 756.88 - | 35960327 | 35961227 | 0,0,255 | 1 | 900 | 0 |
| scaffold_16 | 35978605 | 35979535 | locus28.1 | 773.02 - | 35978605 | 35979535 | 0,0,255 | 1 | 930 | 0 |
| scaffold_16 | 36517683 | 36518619 | locus31.1 | 775.46 - | 36517683 | 36518619 | 0,0,255 | 1 | 936 | 0 |
| scaffold_16 | 36556572 | 36557385 | locus32.1 | 663.82 + | 36556572 | 36557385 | 0,0,255 | 1 | 813 | 0 |

---

**Smalltooth\_sawfish**

---

|            |           |           |           |         |   |           |           |         |   |      |   |
|------------|-----------|-----------|-----------|---------|---|-----------|-----------|---------|---|------|---|
| CM019860.1 | 81599275  | 81600256  | locus19.1 | 797.55  | - | 81599275  | 81600256  | 0,0,255 | 1 | 981  | 0 |
| CM019860.1 | 81632010  | 81633054  | locus20.1 | 848.17  | - | 81632010  | 81633054  | 0,0,255 | 1 | 1044 | 0 |
| CM019860.1 | 81858781  | 81859684  | locus21.1 | 741.72  | + | 81858781  | 81859684  | 0,0,255 | 1 | 903  | 0 |
| CM019860.1 | 108428013 | 108428826 | locus24.1 | 662.55  | - | 108428013 | 108428826 | 0,0,255 | 1 | 813  | 0 |
| CM019860.1 | 108543764 | 108545009 | locus31.1 | 1020.13 | - | 108543764 | 108545009 | 0,0,255 | 1 | 1245 | 0 |
| CM019860.1 | 108592296 | 108593187 | locus33.1 | 735.25  | + | 108592296 | 108593187 | 0,0,255 | 1 | 891  | 0 |
| CM019860.1 | 108611520 | 108612660 | locus34.1 | 871.47  | + | 108611520 | 108612660 | 0,0,255 | 1 | 1140 | 0 |
| CM019860.1 | 108680533 | 108681346 | locus36.1 | 670.28  | + | 108680533 | 108681346 | 0,0,255 | 1 | 813  | 0 |
| CM019860.1 | 108687346 | 108688162 | locus37.1 | 677.69  | - | 108687346 | 108688162 | 0,0,255 | 1 | 816  | 0 |
| CM019860.1 | 108731703 | 108732516 | locus38.1 | 668.05  | + | 108731703 | 108732516 | 0,0,255 | 1 | 813  | 0 |
| CM019860.1 | 108749465 | 108750281 | locus39.1 | 668.97  | - | 108749465 | 108750281 | 0,0,255 | 1 | 816  | 0 |
| CM019860.1 | 109346601 | 109347492 | locus41.1 | 740.71  | + | 109346601 | 109347492 | 0,0,255 | 1 | 891  | 0 |
| CM019860.1 | 109360872 | 109361763 | locus42.1 | 740.2   | + | 109360872 | 109361763 | 0,0,255 | 1 | 891  | 0 |
| CM019860.1 | 109372416 | 109373307 | locus43.1 | 741.74  | + | 109372416 | 109373307 | 0,0,255 | 1 | 891  | 0 |
| CM019860.1 | 109387080 | 109387971 | locus44.1 | 739.03  | + | 109387080 | 109387971 | 0,0,255 | 1 | 891  | 0 |
| CM019860.1 | 109415317 | 109416235 | locus46.1 | 744.7   | + | 109415317 | 109416235 | 0,0,255 | 1 | 918  | 0 |
| CM019860.1 | 109432060 | 109432978 | locus48.1 | 758.93  | + | 109432060 | 109432978 | 0,0,255 | 1 | 918  | 0 |
| CM019860.1 | 109448836 | 109449754 | locus49.1 | 756.19  | + | 109448836 | 109449754 | 0,0,255 | 1 | 918  | 0 |
| CM019860.1 | 109470582 | 109471500 | locus51.1 | 748.05  | + | 109470582 | 109471500 | 0,0,255 | 1 | 918  | 0 |
| CM019860.1 | 109500707 | 109501625 | locus53.1 | 745.54  | + | 109500707 | 109501625 | 0,0,255 | 1 | 918  | 0 |
| CM019860.1 | 109533410 | 109534328 | locus55.1 | 743.05  | + | 109533410 | 109534328 | 0,0,255 | 1 | 918  | 0 |
| CM019860.1 | 109551998 | 109552916 | locus57.1 | 757.54  | + | 109551998 | 109552916 | 0,0,255 | 1 | 918  | 0 |
| CM019860.1 | 109574654 | 109575572 | locus59.1 | 757.95  | + | 109574654 | 109575572 | 0,0,255 | 1 | 918  | 0 |

CM019860.1 109725444 109726473 locus61.1 855.7 + 109725444 109726473 0,0,255 1 1029 0

---

## Reedfish

|            |           |           |              |          |           |           |         |   |     |   |
|------------|-----------|-----------|--------------|----------|-----------|-----------|---------|---|-----|---|
| LR536433.1 | 117940254 | 117941241 | locus27372.1 | 802.65 - | 117940254 | 117941241 | 0,0,255 | 1 | 987 | 0 |
| LR536433.1 | 118001930 | 118002821 | locus27375.1 | 723.23 - | 118001930 | 118002821 | 0,0,255 | 1 | 891 | 0 |
| LR536433.1 | 118551605 | 118552418 | locus27405.1 | 660.16 + | 118551605 | 118552418 | 0,0,255 | 1 | 813 | 0 |
| LR536433.1 | 118591654 | 118592458 | locus27408.1 | 650.02 + | 118591654 | 118592458 | 0,0,255 | 1 | 804 | 0 |
| LR536433.1 | 118605859 | 118606663 | locus27410.1 | 650.46 + | 118605859 | 118606663 | 0,0,255 | 1 | 804 | 0 |
| LR536433.1 | 118620442 | 118621252 | locus27411.1 | 665.16 + | 118620442 | 118621252 | 0,0,255 | 1 | 810 | 0 |
| LR536433.1 | 118685126 | 118686113 | locus27417.1 | 817.34 + | 118685126 | 118686113 | 0,0,255 | 1 | 987 | 0 |
| LR536433.1 | 118700162 | 118700975 | locus27418.1 | 665.85 + | 118700162 | 118700975 | 0,0,255 | 1 | 813 | 0 |
| LR536433.1 | 118720451 | 118721261 | locus27420.1 | 723.95 + | 118720451 | 118721261 | 0,0,255 | 1 | 810 | 0 |
| LR536433.1 | 118744336 | 118745149 | locus27423.1 | 663.48 + | 118744336 | 118745149 | 0,0,255 | 1 | 813 | 0 |
| LR536433.1 | 118762868 | 118763681 | locus27424.1 | 661.8 +  | 118762868 | 118763681 | 0,0,255 | 1 | 813 | 0 |
| LR536433.1 | 118784814 | 118785627 | locus27426.1 | 662.36 + | 118784814 | 118785627 | 0,0,255 | 1 | 813 | 0 |
| LR536433.1 | 118801657 | 118802581 | locus27427.1 | 759.44 + | 118801657 | 118802581 | 0,0,255 | 1 | 924 | 0 |
| LR536433.1 | 118821122 | 118821935 | locus27432.1 | 659.77 + | 118821122 | 118821935 | 0,0,255 | 1 | 813 | 0 |
| LR536433.1 | 118839755 | 118840565 | locus27436.1 | 661.69 + | 118839755 | 118840565 | 0,0,255 | 1 | 810 | 0 |
| LR536433.1 | 118867951 | 118868761 | locus27441.1 | 663.32 + | 118867951 | 118868761 | 0,0,255 | 1 | 810 | 0 |
| LR536433.1 | 118881454 | 118882264 | locus27442.1 | 657.56 + | 118881454 | 118882264 | 0,0,255 | 1 | 810 | 0 |
| LR536433.1 | 118905319 | 118906129 | locus27444.1 | 658.12 + | 118905319 | 118906129 | 0,0,255 | 1 | 810 | 0 |
| LR536433.1 | 118945412 | 118946225 | locus27451.1 | 661.31 + | 118945412 | 118946225 | 0,0,255 | 1 | 813 | 0 |
| LR536433.1 | 118959787 | 118960597 | locus27452.1 | 658.85 + | 118959787 | 118960597 | 0,0,255 | 1 | 810 | 0 |
| LR536433.1 | 118967678 | 118968605 | locus27454.1 | 763.77 + | 118967678 | 118968605 | 0,0,255 | 1 | 927 | 0 |
| LR536433.1 | 118990787 | 118991597 | locus27456.1 | 662.17 + | 118990787 | 118991597 | 0,0,255 | 1 | 810 | 0 |
| LR536433.1 | 119010827 | 119011709 | locus27457.1 | 726.36 + | 119010827 | 119011709 | 0,0,255 | 1 | 882 | 0 |



|            |           |           |              |          |           |           |         |   |     |   |
|------------|-----------|-----------|--------------|----------|-----------|-----------|---------|---|-----|---|
| LR536433.1 | 119027494 | 119028301 | locus27461.1 | 655.55 + | 119027494 | 119028301 | 0,0,255 | 1 | 807 | 0 |
| LR536433.1 | 119049701 | 119050508 | locus27464.1 | 656.36 + | 119049701 | 119050508 | 0,0,255 | 1 | 807 | 0 |
| LR536433.1 | 119069853 | 119070648 | locus27467.1 | 643.87 + | 119069853 | 119070648 | 0,0,255 | 1 | 795 | 0 |
| LR536433.1 | 119083036 | 119083831 | locus27468.1 | 645.06 + | 119083036 | 119083831 | 0,0,255 | 1 | 795 | 0 |
| LR536433.1 | 119098554 | 119099349 | locus27472.1 | 647.14 + | 119098554 | 119099349 | 0,0,255 | 1 | 795 | 0 |
| LR536433.1 | 119139581 | 119140376 | locus27474.1 | 644.99 + | 119139581 | 119140376 | 0,0,255 | 1 | 795 | 0 |
| LR536433.1 | 119157263 | 119158073 | locus27478.1 | 662.53 + | 119157263 | 119158073 | 0,0,255 | 1 | 810 | 0 |
| LR536433.1 | 119171291 | 119172122 | locus27482.1 | 672.7 +  | 119171291 | 119172122 | 0,0,255 | 1 | 831 | 0 |
| LR536433.1 | 119202381 | 119203224 | locus27487.1 | 681.29 + | 119202381 | 119203224 | 0,0,255 | 1 | 843 | 0 |
| LR536433.1 | 119234880 | 119235732 | locus27491.1 | 688.83 + | 119234880 | 119235732 | 0,0,255 | 1 | 852 | 0 |
| LR536433.1 | 119269856 | 119270696 | locus27495.1 | 678.65 + | 119269856 | 119270696 | 0,0,255 | 1 | 840 | 0 |
| LR536433.1 | 119316358 | 119317153 | locus27496.1 | 651.64 + | 119316358 | 119317153 | 0,0,255 | 1 | 795 | 0 |
| LR536433.1 | 119346971 | 119347766 | locus27498.1 | 652.07 + | 119346971 | 119347766 | 0,0,255 | 1 | 795 | 0 |
| LR536433.1 | 119368834 | 119369629 | locus27501.1 | 652.72 + | 119368834 | 119369629 | 0,0,255 | 1 | 795 | 0 |
| LR536433.1 | 119402263 | 119403070 | locus27507.1 | 653.78 + | 119402263 | 119403070 | 0,0,255 | 1 | 807 | 0 |
| LR536433.1 | 119424287 | 119425100 | locus27509.1 | 662.36 + | 119424287 | 119425100 | 0,0,255 | 1 | 813 | 0 |
| LR536433.1 | 119432190 | 119433153 | locus27510.1 | 791.37 + | 119432190 | 119433153 | 0,0,255 | 1 | 963 | 0 |
| LR536433.1 | 119446425 | 119447271 | locus27514.1 | 689.21 + | 119446425 | 119447271 | 0,0,255 | 1 | 846 | 0 |
| LR536433.1 | 119458643 | 119459453 | locus27515.1 | 657.55 + | 119458643 | 119459453 | 0,0,255 | 1 | 810 | 0 |
| LR536433.1 | 119483502 | 119484429 | locus27517.1 | 770.73 + | 119483502 | 119484429 | 0,0,255 | 1 | 927 | 0 |
| LR536433.1 | 119516598 | 119517399 | locus27518.1 | 654.75 + | 119516598 | 119517399 | 0,0,255 | 1 | 801 | 0 |
| LR536433.1 | 119538141 | 119538936 | locus27521.1 | 649.2 +  | 119538141 | 119538936 | 0,0,255 | 1 | 795 | 0 |
| LR536433.1 | 119550328 | 119551123 | locus27524.1 | 650.58 + | 119550328 | 119551123 | 0,0,255 | 1 | 795 | 0 |
| LR536433.1 | 119567728 | 119568661 | locus27527.1 | 767.39 + | 119567728 | 119568661 | 0,0,255 | 1 | 933 | 0 |

|            |           |           |              |          |           |           |         |   |     |   |
|------------|-----------|-----------|--------------|----------|-----------|-----------|---------|---|-----|---|
| LR536433.1 | 119598801 | 119599605 | locus27530.1 | 649.85 + | 119598801 | 119599605 | 0,0,255 | 1 | 804 | 0 |
| LR536433.1 | 119613792 | 119614785 | locus27531.1 | 811.83 + | 119613792 | 119614785 | 0,0,255 | 1 | 993 | 0 |
| LR536433.1 | 119645834 | 119646641 | locus27535.1 | 663.37 + | 119645834 | 119646641 | 0,0,255 | 1 | 807 | 0 |
| LR536433.1 | 119679292 | 119680087 | locus27543.1 | 647.65 + | 119679292 | 119680087 | 0,0,255 | 1 | 795 | 0 |
| LR536433.1 | 121169062 | 121169962 | locus27546.1 | 739.57 + | 121169062 | 121169962 | 0,0,255 | 1 | 900 | 0 |
| LR536433.1 | 121188689 | 121189685 | locus27548.1 | 823.46 + | 121188689 | 121189685 | 0,0,255 | 1 | 996 | 0 |
| LR536433.1 | 121214242 | 121215055 | locus27551.1 | 668.03 + | 121214242 | 121215055 | 0,0,255 | 1 | 813 | 0 |
| LR536433.1 | 121236519 | 121237419 | locus27552.1 | 741.46 + | 121236519 | 121237419 | 0,0,255 | 1 | 900 | 0 |
| LR536433.1 | 121251987 | 121252929 | locus27554.1 | 779.95 + | 121251987 | 121252929 | 0,0,255 | 1 | 942 | 0 |
| LR536433.1 | 121288013 | 121288817 | locus27559.1 | 660.83 + | 121288013 | 121288817 | 0,0,255 | 1 | 804 | 0 |
| LR536433.1 | 121306580 | 121307537 | locus27563.1 | 799.03 + | 121306580 | 121307537 | 0,0,255 | 1 | 957 | 0 |
| LR536433.1 | 121331732 | 121332695 | locus27565.1 | 794.85 + | 121331732 | 121332695 | 0,0,255 | 1 | 963 | 0 |
| LR536433.1 | 121351273 | 121352083 | locus27567.1 | 663.72 + | 121351273 | 121352083 | 0,0,255 | 1 | 810 | 0 |
| LR536433.1 | 121364526 | 121365339 | locus27570.1 | 669.44 + | 121364526 | 121365339 | 0,0,255 | 1 | 813 | 0 |
| LR536433.1 | 121378187 | 121379027 | locus27573.1 | 693.75 + | 121378187 | 121379027 | 0,0,255 | 1 | 840 | 0 |
| LR536433.1 | 121391279 | 121392179 | locus27575.1 | 748.18 + | 121391279 | 121392179 | 0,0,255 | 1 | 900 | 0 |
| LR536433.1 | 121404061 | 121404865 | locus27576.1 | 666.01 + | 121404061 | 121404865 | 0,0,255 | 1 | 804 | 0 |
| LR536433.1 | 121426923 | 121427817 | locus27579.1 | 742.36 + | 121426923 | 121427817 | 0,0,255 | 1 | 894 | 0 |
| LR536433.1 | 121444619 | 121445417 | locus27584.1 | 657.72 + | 121444619 | 121445417 | 0,0,255 | 1 | 798 | 0 |
| LR536433.1 | 121464392 | 121465190 | locus27585.1 | 658.73 + | 121464392 | 121465190 | 0,0,255 | 1 | 798 | 0 |
| LR536433.1 | 121482148 | 121482946 | locus27586.1 | 657.99 + | 121482148 | 121482946 | 0,0,255 | 1 | 798 | 0 |
| LR536433.1 | 121495258 | 121496071 | locus27587.1 | 663.66 + | 121495258 | 121496071 | 0,0,255 | 1 | 813 | 0 |
| LR536433.1 | 121516051 | 121516855 | locus27591.1 | 662.66 + | 121516051 | 121516855 | 0,0,255 | 1 | 804 | 0 |
| LR536433.1 | 121580539 | 121581478 | locus27596.1 | 775.84 + | 121580539 | 121581478 | 0,0,255 | 1 | 939 | 0 |

|            |           |           |              |          |           |           |         |   |      |   |
|------------|-----------|-----------|--------------|----------|-----------|-----------|---------|---|------|---|
| LR536433.1 | 121604253 | 121605189 | locus27597.1 | 781.36 + | 121604253 | 121605189 | 0,0,255 | 1 | 936  | 0 |
| LR536433.1 | 121614609 | 121615569 | locus27599.1 | 793.08 + | 121614609 | 121615569 | 0,0,255 | 1 | 960  | 0 |
| LR536433.1 | 121632443 | 121633463 | locus27603.1 | 850.84 + | 121632443 | 121633463 | 0,0,255 | 1 | 1020 | 0 |
| LR536433.1 | 121676535 | 121677516 | locus27607.1 | 808.04 + | 121676535 | 121677516 | 0,0,255 | 1 | 981  | 0 |
| LR536433.1 | 121698722 | 121699658 | locus27608.1 | 780.08 + | 121698722 | 121699658 | 0,0,255 | 1 | 936  | 0 |
| LR536433.1 | 121736726 | 121737539 | locus27613.1 | 666.68 + | 121736726 | 121737539 | 0,0,255 | 1 | 813  | 0 |
| LR536433.1 | 121755062 | 121755998 | locus27617.1 | 773.95 + | 121755062 | 121755998 | 0,0,255 | 1 | 936  | 0 |
| LR536433.1 | 121787932 | 121788844 | locus27623.1 | 756.86 + | 121787932 | 121788844 | 0,0,255 | 1 | 912  | 0 |
| LR536433.1 | 121809990 | 121810818 | locus27626.1 | 774.88 + | 121809990 | 121810818 | 0,0,255 | 1 | 828  | 0 |
| LR536433.1 | 121822990 | 121823791 | locus27629.1 | 655.34 + | 121822990 | 121823791 | 0,0,255 | 1 | 801  | 0 |
| LR536433.1 | 121849857 | 121850664 | locus27632.1 | 657.83 + | 121849857 | 121850664 | 0,0,255 | 1 | 807  | 0 |
| LR536433.1 | 121858788 | 121859616 | locus27634.1 | 679.11 + | 121858788 | 121859616 | 0,0,255 | 1 | 828  | 0 |
| LR536433.1 | 121882597 | 121883425 | locus27636.1 | 680.32 + | 121882597 | 121883425 | 0,0,255 | 1 | 828  | 0 |
| LR536433.1 | 121897316 | 121898159 | locus27637.1 | 685.02 + | 121897316 | 121898159 | 0,0,255 | 1 | 843  | 0 |
| LR536433.1 | 121924644 | 121925544 | locus27638.1 | 733.31 + | 121924644 | 121925544 | 0,0,255 | 1 | 900  | 0 |
| LR536433.1 | 121947435 | 121948335 | locus27640.1 | 732.58 + | 121947435 | 121948335 | 0,0,255 | 1 | 900  | 0 |
| LR536433.1 | 121955985 | 121956885 | locus27641.1 | 736.85 + | 121955985 | 121956885 | 0,0,255 | 1 | 900  | 0 |
| LR536433.1 | 121981821 | 121982721 | locus27646.1 | 736.85 + | 121981821 | 121982721 | 0,0,255 | 1 | 900  | 0 |
| LR536433.1 | 122003860 | 122004799 | locus27647.1 | 773.45 + | 122003860 | 122004799 | 0,0,255 | 1 | 939  | 0 |
| LR536433.1 | 122041492 | 122042392 | locus27649.1 | 737.24 + | 122041492 | 122042392 | 0,0,255 | 1 | 900  | 0 |
| LR536433.1 | 122056758 | 122057670 | locus27651.1 | 744.52 + | 122056758 | 122057670 | 0,0,255 | 1 | 912  | 0 |
| LR536433.1 | 122070589 | 122071402 | locus27654.1 | 709.66 + | 122070589 | 122071402 | 0,0,255 | 1 | 813  | 0 |
| LR536433.1 | 122089569 | 122090367 | locus27657.1 | 680.2 +  | 122089569 | 122090367 | 0,0,255 | 1 | 798  | 0 |
| LR536433.1 | 122103522 | 122104422 | locus27659.1 | 740.95 + | 122103522 | 122104422 | 0,0,255 | 1 | 900  | 0 |

|            |           |           |              |          |           |           |         |   |     |   |
|------------|-----------|-----------|--------------|----------|-----------|-----------|---------|---|-----|---|
| LR536433.1 | 122487544 | 122488432 | locus27661.1 | 734.27 + | 122487544 | 122488432 | 0,0,255 | 1 | 888 | 0 |
| LR536433.1 | 122507488 | 122508382 | locus27663.1 | 733.79 + | 122507488 | 122508382 | 0,0,255 | 1 | 894 | 0 |
| LR536433.1 | 122520763 | 122521696 | locus27665.1 | 771.93 + | 122520763 | 122521696 | 0,0,255 | 1 | 933 | 0 |
| LR536433.1 | 122551304 | 122552099 | locus27670.1 | 657.82 + | 122551304 | 122552099 | 0,0,255 | 1 | 795 | 0 |
| LR536433.1 | 122564421 | 122565399 | locus27671.1 | 807.14 + | 122564421 | 122565399 | 0,0,255 | 1 | 978 | 0 |
| LR536433.1 | 122587097 | 122588006 | locus27677.1 | 752.71 + | 122587097 | 122588006 | 0,0,255 | 1 | 909 | 0 |
| LR536433.1 | 122614338 | 122615151 | locus27679.1 | 665.32 + | 122614338 | 122615151 | 0,0,255 | 1 | 813 | 0 |
| LR536433.1 | 122633517 | 122634312 | locus27683.1 | 653.68 + | 122633517 | 122634312 | 0,0,255 | 1 | 795 | 0 |
| LR536433.1 | 122642200 | 122643100 | locus27685.1 | 737.8 +  | 122642200 | 122643100 | 0,0,255 | 1 | 900 | 0 |
| LR536433.1 | 122667448 | 122668348 | locus27689.1 | 739 +    | 122667448 | 122668348 | 0,0,255 | 1 | 900 | 0 |
| LR536433.1 | 122693582 | 122694506 | locus27690.1 | 768.94 + | 122693582 | 122694506 | 0,0,255 | 1 | 924 | 0 |
| LR536433.1 | 122738904 | 122739702 | locus27693.1 | 658.15 + | 122738904 | 122739702 | 0,0,255 | 1 | 798 | 0 |
| LR536433.1 | 122753828 | 122754632 | locus27697.1 | 664.1 +  | 122753828 | 122754632 | 0,0,255 | 1 | 804 | 0 |
| LR536433.1 | 122764068 | 122764869 | locus27699.1 | 665.39 + | 122764068 | 122764869 | 0,0,255 | 1 | 801 | 0 |
| LR536433.1 | 122776725 | 122777529 | locus27703.1 | 663.3 +  | 122776725 | 122777529 | 0,0,255 | 1 | 804 | 0 |
| LR536433.1 | 122815883 | 122816684 | locus27707.1 | 662.53 + | 122815883 | 122816684 | 0,0,255 | 1 | 801 | 0 |
| LR536433.1 | 122832262 | 122833054 | locus27711.1 | 649.32 + | 122832262 | 122833054 | 0,0,255 | 1 | 792 | 0 |
| LR536433.1 | 122853324 | 122854200 | locus27713.1 | 726.74 + | 122853324 | 122854200 | 0,0,255 | 1 | 876 | 0 |
| LR536433.1 | 122879352 | 122880165 | locus27719.1 | 669.35 + | 122879352 | 122880165 | 0,0,255 | 1 | 813 | 0 |
| LR536433.1 | 122924618 | 122925533 | locus27724.1 | 763.93 + | 122924618 | 122925533 | 0,0,255 | 1 | 915 | 0 |
| LR536433.1 | 122932964 | 122933768 | locus27727.1 | 661.2 -  | 122932964 | 122933768 | 0,0,255 | 1 | 804 | 0 |
| LR536434.1 | 273369089 | 273370001 | locus56889.1 | 750.66 + | 273369089 | 273370001 | 0,0,255 | 1 | 912 | 0 |
| LR536434.1 | 274753008 | 274753857 | locus56973.1 | 694.41 - | 274753008 | 274753857 | 0,0,255 | 1 | 849 | 0 |
| LR536434.1 | 274825717 | 274826566 | locus56974.1 | 687.69 - | 274825717 | 274826566 | 0,0,255 | 1 | 849 | 0 |

|                |        |        |              |          |        |        |         |   |      |   |
|----------------|--------|--------|--------------|----------|--------|--------|---------|---|------|---|
| CAADRL0100015: | 21326  | 22148  | locus40330.1 | 668.59 + | 21326  | 22148  | 0,0,255 | 1 | 822  | 0 |
| CAADRL0100015: | 41157  | 41967  | locus40334.1 | 658.34 + | 41157  | 41967  | 0,0,255 | 1 | 810  | 0 |
| CAADRL0100015: | 61215  | 62148  | locus40336.1 | 768.37 + | 61215  | 62148  | 0,0,255 | 1 | 933  | 0 |
| CAADRL0100015: | 85917  | 86850  | locus40339.1 | 730.28 + | 85917  | 86850  | 0,0,255 | 1 | 933  | 0 |
| CAADRL0100015: | 114892 | 115825 | locus40342.1 | 767.98 + | 114892 | 115825 | 0,0,255 | 1 | 933  | 0 |
| CAADRL0100015: | 140049 | 140982 | locus40344.1 | 728.28 + | 140049 | 140982 | 0,0,255 | 1 | 933  | 0 |
| CAADRL0100015: | 160432 | 161359 | locus40347.1 | 763.53 + | 160432 | 161359 | 0,0,255 | 1 | 927  | 0 |
| CAADRL0100015: | 176758 | 177763 | locus40349.1 | 832.76 + | 176758 | 177763 | 0,0,255 | 1 | 1005 | 0 |
| CAADRL0100015: | 190866 | 191796 | locus40350.1 | 765.59 + | 190866 | 191796 | 0,0,255 | 1 | 930  | 0 |
| CAADRL0100015: | 231602 | 232571 | locus40354.1 | 792.46 + | 231602 | 232571 | 0,0,255 | 1 | 969  | 0 |
| CAADRL0100015: | 339549 | 340359 | locus40363.1 | 755.24 + | 339549 | 340359 | 0,0,255 | 1 | 810  | 0 |
| CAADRL0100015: | 361336 | 362149 | locus40365.1 | 659.01 + | 361336 | 362149 | 0,0,255 | 1 | 813  | 0 |
| CAADRL0100015: | 373831 | 374734 | locus40368.1 | 740.41 + | 373831 | 374734 | 0,0,255 | 1 | 903  | 0 |
| CAADRL0100015: | 393159 | 393957 | locus40371.1 | 697.9 +  | 393159 | 393957 | 0,0,255 | 1 | 798  | 0 |
| CAADRL0100015: | 419653 | 420463 | locus40372.1 | 662.06 + | 419653 | 420463 | 0,0,255 | 1 | 810  | 0 |
| CAADRL0100015: | 450271 | 451066 | locus40375.1 | 650.21 + | 450271 | 451066 | 0,0,255 | 1 | 795  | 0 |
| CAADRL0100015: | 469155 | 469980 | locus40378.1 | 668.29 - | 469155 | 469980 | 0,0,255 | 1 | 825  | 0 |
| CAADRL0100015: | 494094 | 494916 | locus40381.1 | 665.33 - | 494094 | 494916 | 0,0,255 | 1 | 822  | 0 |
| CAADRL0100015: | 500715 | 501561 | locus40382.1 | 684.92 - | 500715 | 501561 | 0,0,255 | 1 | 846  | 0 |
| CAADRL0100015: | 525833 | 526649 | locus40383.1 | 664.12 + | 525833 | 526649 | 0,0,255 | 1 | 816  | 0 |
| CAADRL0100015: | 545218 | 546088 | locus40385.1 | 714.39 - | 545218 | 546088 | 0,0,255 | 1 | 870  | 0 |
| CAADRL0100015: | 586244 | 587174 | locus40391.1 | 774.42 - | 586244 | 587174 | 0,0,255 | 1 | 930  | 0 |
| CAADRL0100015: | 599660 | 600560 | locus40393.1 | 750.52 - | 599660 | 600560 | 0,0,255 | 1 | 900  | 0 |
| CAADRL0100015: | 656664 | 657576 | locus40403.1 | 766.49 - | 656664 | 657576 | 0,0,255 | 1 | 912  | 0 |

|                |         |         |              |          |         |         |         |   |     |   |
|----------------|---------|---------|--------------|----------|---------|---------|---------|---|-----|---|
| CAADRL0100015: | 698980  | 699886  | locus40406.1 | 744.31 + | 698980  | 699886  | 0,0,255 | 1 | 906 | 0 |
| CAADRL0100015: | 718441  | 719266  | locus40408.1 | 681.08 + | 718441  | 719266  | 0,0,255 | 1 | 825 | 0 |
| CAADRL0100015: | 725661  | 726477  | locus40409.1 | 662.85 - | 725661  | 726477  | 0,0,255 | 1 | 816 | 0 |
| CAADRL0100015: | 782053  | 782962  | locus40415.1 | 757.66 + | 782053  | 782962  | 0,0,255 | 1 | 909 | 0 |
| CAADRL0100015: | 808493  | 809303  | locus40417.1 | 669.33 + | 808493  | 809303  | 0,0,255 | 1 | 810 | 0 |
| CAADRL0100015: | 819983  | 820796  | locus40419.1 | 669.12 + | 819983  | 820796  | 0,0,255 | 1 | 813 | 0 |
| CAADRL0100015: | 828710  | 829511  | locus40420.1 | 667.6 +  | 828710  | 829511  | 0,0,255 | 1 | 801 | 0 |
| CAADRL0100015: | 845794  | 846601  | locus40424.1 | 662.49 + | 845794  | 846601  | 0,0,255 | 1 | 807 | 0 |
| CAADRL0100015: | 860789  | 861602  | locus40427.1 | 662.62 + | 860789  | 861602  | 0,0,255 | 1 | 813 | 0 |
| CAADRL0100015: | 883318  | 884131  | locus40429.1 | 672.36 + | 883318  | 884131  | 0,0,255 | 1 | 813 | 0 |
| CAADRL0100015: | 914059  | 914866  | locus40433.1 | 664.85 + | 914059  | 914866  | 0,0,255 | 1 | 807 | 0 |
| CAADRL0100015: | 941278  | 942091  | locus40435.1 | 671.79 + | 941278  | 942091  | 0,0,255 | 1 | 813 | 0 |
| CAADRL0100015: | 962312  | 963311  | locus40436.1 | 827.13 + | 962312  | 963311  | 0,0,255 | 1 | 999 | 0 |
| CAADRL0100015: | 998814  | 999714  | locus40437.1 | 741.02 + | 998814  | 999714  | 0,0,255 | 1 | 900 | 0 |
| CAADRL0100015: | 1076756 | 1077656 | locus40443.1 | 740.82 + | 1076756 | 1077656 | 0,0,255 | 1 | 900 | 0 |
| CAADRL0100015: | 1106686 | 1107649 | locus40448.1 | 800.5 +  | 1106686 | 1107649 | 0,0,255 | 1 | 963 | 0 |
| CAADRL0100015: | 1125519 | 1126458 | locus40451.1 | 774.11 + | 1125519 | 1126458 | 0,0,255 | 1 | 939 | 0 |
| CAADRL0100015: | 1147897 | 1148710 | locus40453.1 | 665.01 - | 1147897 | 1148710 | 0,0,255 | 1 | 813 | 0 |
| CAADRL0100015: | 1195602 | 1196541 | locus40458.1 | 727.49 + | 1195602 | 1196541 | 0,0,255 | 1 | 939 | 0 |
| CAADRL0100015: | 1220414 | 1221314 | locus40460.1 | 739.44 + | 1220414 | 1221314 | 0,0,255 | 1 | 900 | 0 |
| CAADRL0100015: | 1237200 | 1238139 | locus40462.1 | 778.97 + | 1237200 | 1238139 | 0,0,255 | 1 | 939 | 0 |
| CAADRL0100015: | 1268277 | 1269237 | locus40464.1 | 792.43 + | 1268277 | 1269237 | 0,0,255 | 1 | 960 | 0 |
| CAADRL0100015: | 1313230 | 1314025 | locus40468.1 | 701.98 + | 1313230 | 1314025 | 0,0,255 | 1 | 795 | 0 |
| CAADRL0100015: | 1330491 | 1331430 | locus40470.1 | 778.48 + | 1330491 | 1331430 | 0,0,255 | 1 | 939 | 0 |

|                |         |         |              |          |         |         |         |   |      |   |
|----------------|---------|---------|--------------|----------|---------|---------|---------|---|------|---|
| CAADRL0100015: | 1354663 | 1355476 | locus40471.1 | 663.6 -  | 1354663 | 1355476 | 0,0,255 | 1 | 813  | 0 |
| CAADRL0100015: | 1387471 | 1388284 | locus40475.1 | 668.12 - | 1387471 | 1388284 | 0,0,255 | 1 | 813  | 0 |
| CAADRL0100015: | 1403119 | 1403932 | locus40478.1 | 667.11 - | 1403119 | 1403932 | 0,0,255 | 1 | 813  | 0 |
| CAADRL0100015: | 1421907 | 1422837 | locus40479.1 | 765.53 - | 1421907 | 1422837 | 0,0,255 | 1 | 930  | 0 |
| CAADRL0100015: | 1436454 | 1437402 | locus40481.1 | 777.6 -  | 1436454 | 1437402 | 0,0,255 | 1 | 948  | 0 |
| CAADRL0100015: | 1452346 | 1453153 | locus40483.1 | 709.35 - | 1452346 | 1453153 | 0,0,255 | 1 | 807  | 0 |
| CAADRL0100015: | 1461893 | 1462784 | locus40486.1 | 733.64 - | 1461893 | 1462784 | 0,0,255 | 1 | 891  | 0 |
| CAADRL0100015: | 1500626 | 1501442 | locus40490.1 | 669.9 -  | 1500626 | 1501442 | 0,0,255 | 1 | 816  | 0 |
| CAADRL0100015: | 1520255 | 1521053 | locus40492.1 | 653.88 - | 1520255 | 1521053 | 0,0,255 | 1 | 798  | 0 |
| CAADRL0100015: | 1537080 | 1538124 | locus40497.1 | 871.1 -  | 1537080 | 1538124 | 0,0,255 | 1 | 1044 | 0 |
| CAADRL0100015: | 1554762 | 1555557 | locus40499.1 | 722.73 - | 1554762 | 1555557 | 0,0,255 | 1 | 795  | 0 |
| CAADRL0100015: | 1567042 | 1567837 | locus40501.1 | 723.17 - | 1567042 | 1567837 | 0,0,255 | 1 | 795  | 0 |
| CAADRL0100015: | 1592090 | 1592885 | locus40503.1 | 714.17 - | 1592090 | 1592885 | 0,0,255 | 1 | 795  | 0 |
| CAADRL0100015: | 1614762 | 1615692 | locus40506.1 | 768.64 - | 1614762 | 1615692 | 0,0,255 | 1 | 930  | 0 |
| CAADRL0100015: | 1631155 | 1631950 | locus40509.1 | 705.69 - | 1631155 | 1631950 | 0,0,255 | 1 | 795  | 0 |
| CAADRL0100015: | 1647576 | 1648380 | locus40513.1 | 661.85 - | 1647576 | 1648380 | 0,0,255 | 1 | 804  | 0 |
| CAADRL0100015: | 1667137 | 1668076 | locus40514.1 | 771.35 - | 1667137 | 1668076 | 0,0,255 | 1 | 939  | 0 |
| CAADRL0100015: | 2423742 | 2424705 | locus40515.1 | 794.85 - | 2423742 | 2424705 | 0,0,255 | 1 | 963  | 0 |
| CAADRL0100015: | 2449079 | 2450036 | locus40517.1 | 799.19 - | 2449079 | 2450036 | 0,0,255 | 1 | 957  | 0 |
| CAADRL0100015: | 2478025 | 2478967 | locus40520.1 | 780.09 - | 2478025 | 2478967 | 0,0,255 | 1 | 942  | 0 |
| CAADRL0100015: | 2490512 | 2491412 | locus40523.1 | 742.43 - | 2490512 | 2491412 | 0,0,255 | 1 | 900  | 0 |

**Sterlet**

|            |         |         |            |         |         |         |         |   |      |   |
|------------|---------|---------|------------|---------|---------|---------|---------|---|------|---|
| CM021261.1 | 5650468 | 5651500 | locus180.1 | 599.3 - | 5650468 | 5651500 | 0,0,255 | 1 | 1032 | 0 |
| CM021261.1 | 5775258 | 5776053 | locus182.1 | 606.8 - | 5775258 | 5776053 | 0,0,255 | 1 | 795  | 0 |
| CM021261.1 | 5784168 | 5785152 | locus183.1 | 607.3 - | 5784168 | 5785152 | 0,0,255 | 1 | 984  | 0 |
| CM021261.1 | 5798180 | 5798975 | locus184.1 | 604.8 + | 5798180 | 5798975 | 0,0,255 | 1 | 795  | 0 |
| CM021261.1 | 5806225 | 5807020 | locus185.1 | 599.8 + | 5806225 | 5807020 | 0,0,255 | 1 | 795  | 0 |
| CM021261.1 | 5815076 | 5815871 | locus186.1 | 594.8 + | 5815076 | 5815871 | 0,0,255 | 1 | 795  | 0 |
| CM021261.1 | 5824945 | 5825869 | locus187.1 | 576.1 + | 5824945 | 5825869 | 0,0,255 | 1 | 924  | 0 |
| CM021261.1 | 5837160 | 5838120 | locus188.1 | 604.8 - | 5837160 | 5838120 | 0,0,255 | 1 | 960  | 0 |
| CM021261.1 | 5847503 | 5848298 | locus189.1 | 606.3 - | 5847503 | 5848298 | 0,0,255 | 1 | 795  | 0 |
| CM021261.1 | 5881419 | 5882241 | locus191.1 | 605.3 + | 5881419 | 5882241 | 0,0,255 | 1 | 822  | 0 |
| CM021261.1 | 5897511 | 5898450 | locus192.1 | 589.3 + | 5897511 | 5898450 | 0,0,255 | 1 | 939  | 0 |
| CM021261.1 | 5907782 | 5908682 | locus193.1 | 579.8 + | 5907782 | 5908682 | 0,0,255 | 1 | 900  | 0 |
| CM021261.1 | 5920448 | 5921348 | locus194.1 | 585.8 + | 5920448 | 5921348 | 0,0,255 | 1 | 900  | 0 |
| CM021261.1 | 5934387 | 5935287 | locus195.1 | 587.3 + | 5934387 | 5935287 | 0,0,255 | 1 | 900  | 0 |
| CM021261.1 | 5944272 | 5945172 | locus196.1 | 591.8 + | 5944272 | 5945172 | 0,0,255 | 1 | 900  | 0 |
| CM021261.1 | 5952262 | 5953075 | locus197.1 | 586.3 + | 5952262 | 5953075 | 0,0,255 | 1 | 813  | 0 |
| CM021261.1 | 5961166 | 5962066 | locus199.1 | 592.3 + | 5961166 | 5962066 | 0,0,255 | 1 | 900  | 0 |
| CM021261.1 | 6067895 | 6068774 | locus200.1 | 603.3 + | 6067895 | 6068774 | 0,0,255 | 1 | 879  | 0 |
| CM021261.1 | 6087488 | 6088439 | locus201.1 | 590.8 + | 6087488 | 6088439 | 0,0,255 | 1 | 951  | 0 |
| CM021261.1 | 6097731 | 6098544 | locus202.1 | 591.3 + | 6097731 | 6098544 | 0,0,255 | 1 | 813  | 0 |
| CM021261.1 | 6110866 | 6111679 | locus203.1 | 602.3 + | 6110866 | 6111679 | 0,0,255 | 1 | 813  | 0 |
| CM021261.1 | 6125954 | 6126881 | locus204.1 | 600.3 + | 6125954 | 6126881 | 0,0,255 | 1 | 927  | 0 |
| CM021261.1 | 6136253 | 6137141 | locus205.1 | 594.8 + | 6136253 | 6137141 | 0,0,255 | 1 | 888  | 0 |



|            |          |          |            |         |          |          |         |   |         |       |
|------------|----------|----------|------------|---------|----------|----------|---------|---|---------|-------|
| CM021261.1 | 6145025  | 6145913  | locus206.1 | 596.8 + | 6145025  | 6145913  | 0,0,255 | 1 | 888     | 0     |
| CM021261.1 | 6159344  | 6160211  | locus208.1 | 604.2 + | 6159344  | 6160211  | 0,0,255 | 1 | 867     | 0     |
| CM021261.1 | 6166453  | 6167362  | locus209.1 | 576.4 - | 6166453  | 6167362  | 0,0,255 | 1 | 909     | 0     |
| CM021268.1 | 27942084 | 27942996 | locus276.1 | 568.9 + | 27942084 | 27942996 | 0,0,255 | 1 | 912     | 0     |
| CM021268.1 | 27945509 | 27946400 | locus277.1 | 529 -   | 27945509 | 27946400 | 0,0,255 | 1 | 891     | 0     |
| CM021268.1 | 27958905 | 27959805 | locus278.1 | 531.6 - | 27958905 | 27959805 | 0,0,255 | 1 | 900     | 0     |
| CM021268.1 | 27967605 | 27968418 | locus280.1 | 590.3 - | 27967605 | 27968418 | 0,0,255 | 1 | 813     | 0     |
| CM021268.1 | 27995822 | 27996764 | locus281.1 | 597.3 - | 27995822 | 27996764 | 0,0,255 | 1 | 942     | 0     |
| CM021268.1 | 28012722 | 28013535 | locus282.1 | 594.3 - | 28012722 | 28013535 | 0,0,255 | 1 | 813     | 0     |
| CM021268.1 | 28024304 | 28025183 | locus283.1 | 598.3 - | 28024304 | 28025183 | 0,0,255 | 1 | 879     | 0     |
| CM021268.1 | 28042484 | 28043453 | locus284.1 | 586.3 - | 28042484 | 28043453 | 0,0,255 | 1 | 969     | 0     |
| CM021268.1 | 28069288 | 28070188 | locus285.1 | 578.3 - | 28069288 | 28070188 | 0,0,255 | 1 | 900     | 0     |
| CM021268.1 | 28093726 | 28094536 | locus286.1 | 572.7 - | 28093726 | 28094536 | 0,0,255 | 1 | 810     | 0     |
| CM021268.1 | 28100654 | 28101560 | locus287.1 | 601.8 - | 28100654 | 28101560 | 0,0,255 | 1 | 906     | 0     |
| CM021268.1 | 28118261 | 28119077 | locus288.1 | 606.9 + | 28118261 | 28119077 | 0,0,255 | 1 | 816     | 0     |
| CM021268.1 | 28135289 | 28136084 | locus289.1 | 601.8 + | 28135289 | 28136084 | 0,0,255 | 1 | 795     | 0     |
| CM021268.1 | 28141557 | 28142364 | locus290.1 | 588.3 + | 28141557 | 28142364 | 0,0,255 | 1 | 807     | 0     |
| CM021268.1 | 28149043 | 28149859 | locus292.1 | 559.3 - | 28149043 | 28149859 | 0,0,255 | 1 | 816     | 0     |
| CM021268.1 | 28160236 | 28161043 | locus293.1 | 572.4 + | 28160236 | 28161043 | 0,0,255 | 1 | 807     | 0     |
| CM021268.1 | 28260625 | 28261522 | locus295.1 | 544.7 + | 28260625 | 28261522 | 0,0,255 | 1 | 897     | 0     |
| CM021302.1 | 1738706  | 1740130  | locus410.1 | 438.8 + | 1738706  | 1740130  | 0,0,255 | 2 | 333,435 | 0,989 |
| CM021306.1 | 1933890  | 1934907  | locus416.1 | 496.1 + | 1933890  | 1934907  | 0,0,255 | 1 | 1017    | 0     |
| VTUV010003 | 79217    | 80234    | locus438.1 | 495.6 - | 79217    | 80234    | 0,0,255 | 1 | 1017    | 0     |

---

**Spotted\_gar**

|      |         |         |            |          |         |         |         |   |         |         |
|------|---------|---------|------------|----------|---------|---------|---------|---|---------|---------|
| LG14 | 3737208 | 3738021 | locus100.1 | 664.65 - | 3737208 | 3738021 | 0,0,255 | 1 | 813     | 0       |
| LG14 | 3760919 | 3761888 | locus105.1 | 807.65 - | 3760919 | 3761888 | 0,0,255 | 1 | 969     | 0       |
| LG14 | 3782446 | 3783259 | locus110.1 | 671.69 - | 3782446 | 3783259 | 0,0,255 | 1 | 813     | 0       |
| LG14 | 3796418 | 3797348 | locus113.1 | 770.65 - | 3796418 | 3797348 | 0,0,255 | 1 | 930     | 0       |
| LG14 | 3831636 | 3893202 | locus120.1 | 635.44 - | 3831636 | 3893202 | 0,0,255 | 2 | 354,456 | 0,61110 |
| LG14 | 3869152 | 3870106 | locus128.1 | 793.12 - | 3869152 | 3870106 | 0,0,255 | 1 | 954     | 0       |
| LG14 | 3879025 | 3879829 | locus130.1 | 662.39 - | 3879025 | 3879829 | 0,0,255 | 1 | 804     | 0       |
| LG14 | 3914055 | 3915003 | locus135.1 | 787.93 - | 3914055 | 3915003 | 0,0,255 | 1 | 948     | 0       |
| LG14 | 3944736 | 3945552 | locus137.1 | 661.82 + | 3944736 | 3945552 | 0,0,255 | 1 | 816     | 0       |
| LG14 | 3957616 | 3958456 | locus140.1 | 689.85 - | 3957616 | 3958456 | 0,0,255 | 1 | 840     | 0       |
| LG14 | 4014355 | 4015309 | locus143.1 | 798.36 + | 4014355 | 4015309 | 0,0,255 | 1 | 954     | 0       |
| LG14 | 4033923 | 4034787 | locus146.1 | 697.44 - | 4033923 | 4034787 | 0,0,255 | 1 | 864     | 0       |
| LG14 | 4047446 | 4048346 | locus147.1 | 733.65 + | 4047446 | 4048346 | 0,0,255 | 1 | 900     | 0       |
| LG14 | 4055702 | 4056599 | locus148.1 | 736.46 + | 4055702 | 4056599 | 0,0,255 | 1 | 897     | 0       |
| LG14 | 4073886 | 4074819 | locus150.1 | 769 +    | 4073886 | 4074819 | 0,0,255 | 1 | 933     | 0       |
| LG14 | 4089462 | 4090362 | locus152.1 | 734.09 + | 4089462 | 4090362 | 0,0,255 | 1 | 900     | 0       |
| LG14 | 4111372 | 4112299 | locus154.1 | 760.8 +  | 4111372 | 4112299 | 0,0,255 | 1 | 927     | 0       |
| LG14 | 4131658 | 4168717 | locus156.1 | 732.29 - | 4131658 | 4168717 | 0,0,255 | 2 | 691,245 | 0,36814 |
| LG14 | 4184445 | 4185375 | locus161.1 | 760.34 - | 4184445 | 4185375 | 0,0,255 | 1 | 930     | 0       |
| LG14 | 4202753 | 4203653 | locus163.1 | 737.93 - | 4202753 | 4203653 | 0,0,255 | 1 | 900     | 0       |
| LG14 | 4213897 | 4214782 | locus166.1 | 726.91 + | 4213897 | 4214782 | 0,0,255 | 1 | 885     | 0       |
| LG14 | 4216999 | 4217803 | locus167.1 | 658.36 - | 4216999 | 4217803 | 0,0,255 | 1 | 804     | 0       |
| LG14 | 4332432 | 4333272 | locus168.1 | 674.51 + | 4332432 | 4333272 | 0,0,255 | 1 | 840     | 0       |

|      |         |         |           |          |         |         |         |   |     |   |
|------|---------|---------|-----------|----------|---------|---------|---------|---|-----|---|
| LG14 | 3196387 | 3197329 | locus28.1 | 794.09 - | 3196387 | 3197329 | 0,0,255 | 1 | 942 | 0 |
| LG14 | 3367873 | 3368686 | locus42.1 | 640.02 - | 3367873 | 3368686 | 0,0,255 | 1 | 813 | 0 |
| LG14 | 3374600 | 3375413 | locus43.1 | 663.01 - | 3374600 | 3375413 | 0,0,255 | 1 | 813 | 0 |
| LG14 | 3392201 | 3393014 | locus48.1 | 667.88 - | 3392201 | 3393014 | 0,0,255 | 1 | 813 | 0 |
| LG14 | 3416727 | 3417717 | locus52.1 | 827.37 - | 3416727 | 3417717 | 0,0,255 | 1 | 990 | 0 |
| LG14 | 3434304 | 3435237 | locus55.1 | 654.94 - | 3434304 | 3435237 | 0,0,255 | 1 | 933 | 0 |
| LG14 | 3463431 | 3464235 | locus62.1 | 670.37 - | 3463431 | 3464235 | 0,0,255 | 1 | 804 | 0 |
| LG14 | 3512907 | 3513720 | locus66.1 | 674.27 - | 3512907 | 3513720 | 0,0,255 | 1 | 813 | 0 |
| LG14 | 3532059 | 3532872 | locus69.1 | 666.19 - | 3532059 | 3532872 | 0,0,255 | 1 | 813 | 0 |
| LG14 | 3538497 | 3539295 | locus70.1 | 661.27 - | 3538497 | 3539295 | 0,0,255 | 1 | 798 | 0 |
| LG14 | 3545231 | 3546047 | locus71.1 | 670.87 - | 3545231 | 3546047 | 0,0,255 | 1 | 816 | 0 |
| LG14 | 3551595 | 3552408 | locus73.1 | 668.69 - | 3551595 | 3552408 | 0,0,255 | 1 | 813 | 0 |
| LG14 | 3557557 | 3558370 | locus74.1 | 668.17 - | 3557557 | 3558370 | 0,0,255 | 1 | 813 | 0 |
| LG14 | 3573181 | 3573994 | locus76.1 | 667.94 - | 3573181 | 3573994 | 0,0,255 | 1 | 813 | 0 |
| LG14 | 3581356 | 3582301 | locus77.1 | 781.49 - | 3581356 | 3582301 | 0,0,255 | 1 | 945 | 0 |
| LG14 | 3591299 | 3592112 | locus78.1 | 667.75 - | 3591299 | 3592112 | 0,0,255 | 1 | 813 | 0 |
| LG14 | 3612283 | 3613096 | locus81.1 | 675.4 -  | 3612283 | 3613096 | 0,0,255 | 1 | 813 | 0 |
| LG14 | 3621680 | 3622478 | locus83.1 | 661.79 - | 3621680 | 3622478 | 0,0,255 | 1 | 798 | 0 |
| LG14 | 3646917 | 3647766 | locus87.1 | 700 -    | 3646917 | 3647766 | 0,0,255 | 1 | 849 | 0 |
| LG14 | 3657134 | 3657947 | locus88.1 | 673.84 - | 3657134 | 3657947 | 0,0,255 | 1 | 813 | 0 |
| LG14 | 3668870 | 3669683 | locus89.1 | 770.42 - | 3668870 | 3669683 | 0,0,255 | 1 | 813 | 0 |
| LG14 | 3676900 | 3677860 | locus90.1 | 796.81 - | 3676900 | 3677860 | 0,0,255 | 1 | 960 | 0 |
| LG14 | 3692596 | 3693415 | locus92.1 | 673.31 - | 3692596 | 3693415 | 0,0,255 | 1 | 819 | 0 |
| LG14 | 3701843 | 3702656 | locus94.1 | 671.97 - | 3701843 | 3702656 | 0,0,255 | 1 | 813 | 0 |

|      |         |         |            |          |         |         |         |   |      |   |
|------|---------|---------|------------|----------|---------|---------|---------|---|------|---|
| LG14 | 3720159 | 3721134 | locus96.1  | 815.51 - | 3720159 | 3721134 | 0,0,255 | 1 | 975  | 0 |
| LG14 | 4343220 | 4344249 | locus169.1 | 833.96 + | 4343220 | 4344249 | 0,0,255 | 1 | 1029 | 0 |

---

**Japanese\_eel**

---

|                |          |          |            |          |          |          |         |   |     |   |
|----------------|----------|----------|------------|----------|----------|----------|---------|---|-----|---|
| BEWY01000013.1 | 25314840 | 25315641 | locus82.1  | 661.57 - | 25314840 | 25315641 | 0,0,255 | 1 | 801 | 0 |
| BEWY01000017.1 | 8079321  | 8080224  | locus99.1  | 752.6 -  | 8079321  | 8080224  | 0,0,255 | 1 | 903 | 0 |
| BEWY01000017.1 | 8086131  | 8087052  | locus101.1 | 769.19 - | 8086131  | 8087052  | 0,0,255 | 1 | 921 | 0 |
| BEWY01000017.1 | 8107616  | 8108507  | locus106.1 | 742.58 - | 8107616  | 8108507  | 0,0,255 | 1 | 891 | 0 |
| BEWY01000017.1 | 8114233  | 8115136  | locus108.1 | 751.98 - | 8114233  | 8115136  | 0,0,255 | 1 | 903 | 0 |
| BEWY01000017.1 | 8121556  | 8122483  | locus110.1 | 708.44 - | 8121556  | 8122483  | 0,0,255 | 1 | 927 | 0 |
| BEWY01000017.1 | 8135913  | 8136714  | locus113.1 | 658.81 - | 8135913  | 8136714  | 0,0,255 | 1 | 801 | 0 |
| BEWY01000017.1 | 8150012  | 8150819  | locus115.1 | 663.22 - | 8150012  | 8150819  | 0,0,255 | 1 | 807 | 0 |
| BEWY01000017.1 | 8229593  | 8230400  | locus123.1 | 664.72 - | 8229593  | 8230400  | 0,0,255 | 1 | 807 | 0 |
| BEWY01000017.1 | 8261792  | 8262599  | locus128.1 | 663.5 -  | 8261792  | 8262599  | 0,0,255 | 1 | 807 | 0 |
| BEWY01000017.1 | 8309997  | 8310798  | locus138.1 | 658.32 + | 8309997  | 8310798  | 0,0,255 | 1 | 801 | 0 |
| BEWY01000017.1 | 8319418  | 8320219  | locus140.1 | 658.96 + | 8319418  | 8320219  | 0,0,255 | 1 | 801 | 0 |
| BEWY01000017.1 | 8326044  | 8326857  | locus141.1 | 665.03 - | 8326044  | 8326857  | 0,0,255 | 1 | 813 | 0 |
| BEWY01000017.1 | 8335094  | 8335907  | locus142.1 | 667.19 - | 8335094  | 8335907  | 0,0,255 | 1 | 813 | 0 |
| BEWY01000017.1 | 8345255  | 8346155  | locus143.1 | 746.84 - | 8345255  | 8346155  | 0,0,255 | 1 | 900 | 0 |
| BEWY01000017.1 | 8353784  | 8354492  | locus145.1 | 588.04 - | 8353784  | 8354492  | 0,0,255 | 1 | 708 | 0 |
| BEWY01000017.1 | 8379800  | 8380607  | locus149.1 | 663.2 -  | 8379800  | 8380607  | 0,0,255 | 1 | 807 | 0 |
| BEWY01000017.1 | 8392702  | 8393656  | locus151.1 | 789.97 - | 8392702  | 8393656  | 0,0,255 | 1 | 954 | 0 |
| BEWY01000017.1 | 8401849  | 8402785  | locus153.1 | 776.6 -  | 8401849  | 8402785  | 0,0,255 | 1 | 936 | 0 |
| BEWY01000017.1 | 8411598  | 8412411  | locus155.1 | 727.13 - | 8411598  | 8412411  | 0,0,255 | 1 | 813 | 0 |
| BEWY01000017.1 | 8431168  | 8431981  | locus158.1 | 669.19 - | 8431168  | 8431981  | 0,0,255 | 1 | 813 | 0 |
| BEWY01000017.1 | 8436739  | 8437540  | locus159.1 | 659.12 - | 8436739  | 8437540  | 0,0,255 | 1 | 801 | 0 |
| BEWY01000017.1 | 8441411  | 8442224  | locus160.1 | 774.58 - | 8441411  | 8442224  | 0,0,255 | 1 | 813 | 0 |

|                |         |                    |          |         |         |         |   |      |   |
|----------------|---------|--------------------|----------|---------|---------|---------|---|------|---|
| BEWY01000017.1 | 8456849 | 8457866 locus162.1 | 846.09 - | 8456849 | 8457866 | 0,0,255 | 1 | 1017 | 0 |
| BEWY01000017.1 | 8464218 | 8465205 locus165.1 | 816.91 - | 8464218 | 8465205 | 0,0,255 | 1 | 987  | 0 |
| BEWY01000017.1 | 8472235 | 8473201 locus166.1 | 800.98 - | 8472235 | 8473201 | 0,0,255 | 1 | 966  | 0 |
| BEWY01000017.1 | 8532832 | 8533621 locus175.1 | 761.01 - | 8532832 | 8533621 | 0,0,255 | 1 | 789  | 0 |
| BEWY01000017.1 | 8570902 | 8571793 locus182.1 | 738.61 - | 8570902 | 8571793 | 0,0,255 | 1 | 891  | 0 |
| BEWY01000017.1 | 8579213 | 8580026 locus184.1 | 719.9 -  | 8579213 | 8580026 | 0,0,255 | 1 | 813  | 0 |
| BEWY01000017.1 | 8591650 | 8592541 locus186.1 | 740.82 - | 8591650 | 8592541 | 0,0,255 | 1 | 891  | 0 |
| BEWY01000017.1 | 8636939 | 8637752 locus189.1 | 734.53 - | 8636939 | 8637752 | 0,0,255 | 1 | 813  | 0 |
| BEWY01000017.1 | 8647986 | 8648877 locus191.1 | 739.88 - | 8647986 | 8648877 | 0,0,255 | 1 | 891  | 0 |
| BEWY01000017.1 | 8672305 | 8673103 locus193.1 | 656.44 - | 8672305 | 8673103 | 0,0,255 | 1 | 798  | 0 |
| BEWY01000017.1 | 8697135 | 8697951 locus197.1 | 761.88 - | 8697135 | 8697951 | 0,0,255 | 1 | 816  | 0 |
| BEWY01000017.1 | 8713899 | 8714712 locus199.1 | 734.03 - | 8713899 | 8714712 | 0,0,255 | 1 | 813  | 0 |
| BEWY01000017.1 | 8734269 | 8735160 locus202.1 | 738.1 -  | 8734269 | 8735160 | 0,0,255 | 1 | 891  | 0 |
| BEWY01000105.1 | 99827   | 100586 locus217.1  | 637.25 + | 99827   | 100586  | 0,0,255 | 1 | 759  | 0 |
| BEWY01000105.1 | 105898  | 106801 locus219.1  | 752.91 + | 105898  | 106801  | 0,0,255 | 1 | 903  | 0 |
| BEWY01000105.1 | 121675  | 122578 locus223.1  | 751.99 + | 121675  | 122578  | 0,0,255 | 1 | 903  | 0 |
| BEWY01000105.1 | 137524  | 138427 locus227.1  | 753.14 + | 137524  | 138427  | 0,0,255 | 1 | 903  | 0 |
| BEWY01000105.1 | 173486  | 174389 locus234.1  | 752.52 + | 173486  | 174389  | 0,0,255 | 1 | 903  | 0 |
| BEWY01000105.1 | 186258  | 187185 locus236.1  | 717.5 +  | 186258  | 187185  | 0,0,255 | 1 | 927  | 0 |
| BEWY01000105.1 | 196767  | 197706 locus238.1  | 790.11 + | 196767  | 197706  | 0,0,255 | 1 | 939  | 0 |
| BEWY01000105.1 | 262761  | 263763 locus247.1  | 838.51 + | 262761  | 263763  | 0,0,255 | 1 | 1002 | 0 |
| BEWY01000105.1 | 298316  | 299300 locus250.1  | 828.08 + | 298316  | 299300  | 0,0,255 | 1 | 984  | 0 |
| BEWY01000105.1 | 353454  | 354261 locus256.1  | 665.06 + | 353454  | 354261  | 0,0,255 | 1 | 807  | 0 |
| BEWY01000105.1 | 358286  | 359243 locus257.1  | 783.98 - | 358286  | 359243  | 0,0,255 | 1 | 957  | 0 |

|                |        |        |            |          |        |        |         |   |     |   |
|----------------|--------|--------|------------|----------|--------|--------|---------|---|-----|---|
| BEWY01000105.1 | 372732 | 373632 | locus260.1 | 734.34 + | 372732 | 373632 | 0,0,255 | 1 | 900 | 0 |
| BEWY01000105.1 | 385228 | 386128 | locus262.1 | 732.38 + | 385228 | 386128 | 0,0,255 | 1 | 900 | 0 |
| BEWY01000105.1 | 389037 | 389760 | locus263.1 | 592.07 - | 389037 | 389760 | 0,0,255 | 1 | 723 | 0 |
| BEWY01000105.1 | 398950 | 399748 | locus266.1 | 646.44 - | 398950 | 399748 | 0,0,255 | 1 | 798 | 0 |
| BEWY01000105.1 | 410820 | 411720 | locus270.1 | 732.18 + | 410820 | 411720 | 0,0,255 | 1 | 900 | 0 |
| BEWY01000105.1 | 420781 | 421681 | locus272.1 | 734.6 +  | 420781 | 421681 | 0,0,255 | 1 | 900 | 0 |
| BEWY01000105.1 | 429555 | 430455 | locus274.1 | 735.18 + | 429555 | 430455 | 0,0,255 | 1 | 900 | 0 |
| BEWY01000105.1 | 431969 | 432767 | locus275.1 | 649.37 - | 431969 | 432767 | 0,0,255 | 1 | 798 | 0 |
| BEWY01000105.1 | 542413 | 543406 | locus277.1 | 786.49 + | 542413 | 543406 | 0,0,255 | 1 | 993 | 0 |
| BEWY01004646.1 | 5610   | 6552   | locus298.1 | 781.42 - | 5610   | 6552   | 0,0,255 | 1 | 942 | 0 |
| BEWY01074007.1 | 6472   | 7264   | locus360.1 | 728.72 - | 6472   | 7264   | 0,0,255 | 1 | 792 | 0 |
| BEWY01083235.1 | 13034  | 13826  | locus380.1 | 729.74 + | 13034  | 13826  | 0,0,255 | 1 | 792 | 0 |
| BEWY01083235.1 | 37898  | 38708  | locus384.1 | 656.34 - | 37898  | 38708  | 0,0,255 | 1 | 810 | 0 |
| BEWY01083235.1 | 123662 | 124628 | locus394.1 | 788.26 + | 123662 | 124628 | 0,0,255 | 1 | 966 | 0 |
| BEWY01083235.1 | 133413 | 134385 | locus396.1 | 797.85 + | 133413 | 134385 | 0,0,255 | 1 | 972 | 0 |
| BEWY01083235.1 | 164818 | 165619 | locus400.1 | 655.88 + | 164818 | 165619 | 0,0,255 | 1 | 801 | 0 |
| BEWY01083235.1 | 190081 | 190885 | locus404.1 | 706.05 + | 190081 | 190885 | 0,0,255 | 1 | 804 | 0 |

---

## Zebrafish

|    |          |          |            |        |   |          |          |         |   |      |   |
|----|----------|----------|------------|--------|---|----------|----------|---------|---|------|---|
| 18 | 31912757 | 31913675 | locus473.1 | 749.34 | - | 31912757 | 31913675 | 0,0,255 | 1 | 918  | 0 |
| 18 | 31965346 | 31966228 | locus474.1 | 724.98 | - | 31965346 | 31966228 | 0,0,255 | 1 | 882  | 0 |
| 18 | 32136080 | 32136995 | locus475.1 | 769.24 | - | 32136080 | 32136995 | 0,0,255 | 1 | 915  | 0 |
| 18 | 32566599 | 32567412 | locus478.1 | 664.62 | + | 32566599 | 32567412 | 0,0,255 | 1 | 813  | 0 |
| 18 | 32617843 | 32618647 | locus479.1 | 664.85 | + | 32617843 | 32618647 | 0,0,255 | 1 | 804  | 0 |
| 18 | 32674235 | 32675048 | locus480.1 | 665.91 | - | 32674235 | 32675048 | 0,0,255 | 1 | 813  | 0 |
| 18 | 32705492 | 32706302 | locus481.1 | 664.6  | - | 32705492 | 32706302 | 0,0,255 | 1 | 810  | 0 |
| 18 | 32783337 | 32784267 | locus482.1 | 772.44 | + | 32783337 | 32784267 | 0,0,255 | 1 | 930  | 0 |
| 18 | 32918822 | 32919974 | locus485.1 | 959.62 | + | 32918822 | 32919974 | 0,0,255 | 1 | 1152 | 0 |
| 18 | 32953321 | 32954131 | locus486.1 | 664.51 | + | 32953321 | 32954131 | 0,0,255 | 1 | 810  | 0 |
| 18 | 32981139 | 32982171 | locus487.1 | 858.96 | + | 32981139 | 32982171 | 0,0,255 | 1 | 1032 | 0 |
| 18 | 32994991 | 32995792 | locus488.1 | 658.52 | + | 32994991 | 32995792 | 0,0,255 | 1 | 801  | 0 |
| 18 | 32999330 | 33000125 | locus489.1 | 652.27 | + | 32999330 | 33000125 | 0,0,255 | 1 | 795  | 0 |
| 18 | 33012244 | 33013057 | locus490.1 | 679.23 | + | 33012244 | 33013057 | 0,0,255 | 1 | 813  | 0 |
| 18 | 33035786 | 33036740 | locus492.1 | 798.58 | + | 33035786 | 33036740 | 0,0,255 | 1 | 954  | 0 |
| 18 | 33055358 | 33056327 | locus493.1 | 807.96 | + | 33055358 | 33056327 | 0,0,255 | 1 | 969  | 0 |
| 18 | 33078427 | 33079231 | locus494.1 | 663.5  | - | 33078427 | 33079231 | 0,0,255 | 1 | 804  | 0 |
| 18 | 33081323 | 33082130 | locus495.1 | 670.88 | - | 33081323 | 33082130 | 0,0,255 | 1 | 807  | 0 |
| 18 | 33102917 | 33103808 | locus497.1 | 743.91 | + | 33102917 | 33103808 | 0,0,255 | 1 | 891  | 0 |
| 18 | 33134526 | 33135417 | locus498.1 | 744.82 | + | 33134526 | 33135417 | 0,0,255 | 1 | 891  | 0 |
| 18 | 33174818 | 33175628 | locus500.1 | 660.55 | + | 33174818 | 33175628 | 0,0,255 | 1 | 810  | 0 |
| 18 | 33188586 | 33189549 | locus501.1 | 802.06 | + | 33188586 | 33189549 | 0,0,255 | 1 | 963  | 0 |
| 18 | 33215966 | 33216764 | locus502.1 | 760.02 | + | 33215966 | 33216764 | 0,0,255 | 1 | 798  | 0 |



|    |          |          |            |        |   |          |          |         |   |     |   |
|----|----------|----------|------------|--------|---|----------|----------|---------|---|-----|---|
| 18 | 33239653 | 33240538 | locus503.1 | 744.53 | + | 33239653 | 33240538 | 0,0,255 | 1 | 885 | 0 |
| 18 | 33250320 | 33251205 | locus504.1 | 743.88 | - | 33250320 | 33251205 | 0,0,255 | 1 | 885 | 0 |
| 18 | 33267647 | 33268451 | locus505.1 | 667.79 | + | 33267647 | 33268451 | 0,0,255 | 1 | 804 | 0 |
| 18 | 33275108 | 33275912 | locus506.1 | 666.32 | + | 33275108 | 33275912 | 0,0,255 | 1 | 804 | 0 |
| 18 | 33280463 | 33281264 | locus507.1 | 663.32 | + | 33280463 | 33281264 | 0,0,255 | 1 | 801 | 0 |
| 18 | 33293140 | 33294088 | locus509.1 | 791.53 | + | 33293140 | 33294088 | 0,0,255 | 1 | 948 | 0 |
| 18 | 33313860 | 33314799 | locus511.1 | 781.09 | + | 33313860 | 33314799 | 0,0,255 | 1 | 939 | 0 |
| 18 | 33330738 | 33331641 | locus513.1 | 749.82 | + | 33330738 | 33331641 | 0,0,255 | 1 | 903 | 0 |
| 18 | 33333410 | 33334214 | locus514.1 | 654.04 | - | 33333410 | 33334214 | 0,0,255 | 1 | 804 | 0 |
| 18 | 33343400 | 33344315 | locus516.1 | 747.61 | + | 33343400 | 33344315 | 0,0,255 | 1 | 915 | 0 |
| 18 | 33356124 | 33356964 | locus517.1 | 677.58 | + | 33356124 | 33356964 | 0,0,255 | 1 | 840 | 0 |
| 18 | 33377105 | 33378068 | locus519.1 | 780.97 | + | 33377105 | 33378068 | 0,0,255 | 1 | 963 | 0 |
| 18 | 33388851 | 33389754 | locus520.1 | 736.19 | + | 33388851 | 33389754 | 0,0,255 | 1 | 903 | 0 |
| 18 | 33410734 | 33411637 | locus521.1 | 736.26 | + | 33410734 | 33411637 | 0,0,255 | 1 | 903 | 0 |
| 18 | 33423656 | 33424553 | locus522.1 | 740.42 | + | 33423656 | 33424553 | 0,0,255 | 1 | 897 | 0 |
| 18 | 33472684 | 33473581 | locus524.1 | 741.22 | + | 33472684 | 33473581 | 0,0,255 | 1 | 897 | 0 |
| 18 | 33492710 | 33493613 | locus525.1 | 739.94 | + | 33492710 | 33493613 | 0,0,255 | 1 | 903 | 0 |
| 18 | 33525109 | 33526012 | locus526.1 | 739.49 | + | 33525109 | 33526012 | 0,0,255 | 1 | 903 | 0 |
| 18 | 33553111 | 33553897 | locus527.1 | 662.42 | + | 33553111 | 33553897 | 0,0,255 | 1 | 786 | 0 |
| 18 | 33560836 | 33561739 | locus528.1 | 737.8  | + | 33560836 | 33561739 | 0,0,255 | 1 | 903 | 0 |
| 18 | 33576322 | 33577222 | locus530.1 | 738.05 | + | 33576322 | 33577222 | 0,0,255 | 1 | 900 | 0 |
| 18 | 33583019 | 33583907 | locus531.1 | 730.29 | + | 33583019 | 33583907 | 0,0,255 | 1 | 888 | 0 |
| 18 | 33594790 | 33595693 | locus532.1 | 734.25 | + | 33594790 | 33595693 | 0,0,255 | 1 | 903 | 0 |
| 18 | 33655522 | 33656425 | locus533.1 | 738.8  | + | 33655522 | 33656425 | 0,0,255 | 1 | 903 | 0 |

|             |          |          |            |          |          |          |         |   |      |   |
|-------------|----------|----------|------------|----------|----------|----------|---------|---|------|---|
| 18          | 33678329 | 33679250 | locus534.1 | 753.38 + | 33678329 | 33679250 | 0,0,255 | 1 | 921  | 0 |
| 18          | 33687552 | 33688455 | locus535.1 | 737.61 + | 33687552 | 33688455 | 0,0,255 | 1 | 903  | 0 |
| 18          | 33820994 | 33821891 | locus536.1 | 729.12 + | 33820994 | 33821891 | 0,0,255 | 1 | 897  | 0 |
| 18          | 33917456 | 33918356 | locus538.1 | 733.51 + | 33917456 | 33918356 | 0,0,255 | 1 | 900  | 0 |
| 18          | 33972830 | 33973631 | locus539.1 | 752.4 -  | 33972830 | 33973631 | 0,0,255 | 1 | 801  | 0 |
| 18          | 34241448 | 34242558 | locus541.1 | 888.81 + | 34241448 | 34242558 | 0,0,255 | 1 | 1110 | 0 |
| CHR_ALT_CTG | 32237932 | 32238949 | locus795.1 | 835.4 -  | 32237932 | 32238949 | 0,0,255 | 1 | 1017 | 0 |
| CHR_ALT_CTG | 33902127 | 33903027 | locus814.1 | 733.51 + | 33902127 | 33903027 | 0,0,255 | 1 | 900  | 0 |
| CHR_ALT_CTG | 33974726 | 33975656 | locus815.1 | 767.53 - | 33974726 | 33975656 | 0,0,255 | 1 | 930  | 0 |
| CHR_ALT_CTG | 31965346 | 31966228 | locus828.1 | 724.98 - | 31965346 | 31966228 | 0,0,255 | 1 | 882  | 0 |
| CHR_ALT_CTG | 32128657 | 32129449 | locus830.1 | 756.55 - | 32128657 | 32129449 | 0,0,255 | 1 | 792  | 0 |
| CHR_ALT_CTG | 33188586 | 33189549 | locus840.1 | 802.06 + | 33188586 | 33189549 | 0,0,255 | 1 | 963  | 0 |
| CHR_ALT_CTG | 33215966 | 33216764 | locus841.1 | 760.02 + | 33215966 | 33216764 | 0,0,255 | 1 | 798  | 0 |
| CHR_ALT_CTG | 33239656 | 33240541 | locus842.1 | 743.34 + | 33239656 | 33240541 | 0,0,255 | 1 | 885  | 0 |
| CHR_ALT_CTG | 33250335 | 33251220 | locus843.1 | 742.9 -  | 33250335 | 33251220 | 0,0,255 | 1 | 885  | 0 |
| CHR_ALT_CTG | 33270242 | 33271046 | locus844.1 | 666.72 + | 33270242 | 33271046 | 0,0,255 | 1 | 804  | 0 |
| CHR_ALT_CTG | 33277581 | 33278385 | locus845.1 | 666.32 + | 33277581 | 33278385 | 0,0,255 | 1 | 804  | 0 |
| CHR_ALT_CTG | 33283107 | 33283908 | locus846.1 | 663.44 + | 33283107 | 33283908 | 0,0,255 | 1 | 801  | 0 |
| CHR_ALT_CTG | 33318122 | 33319070 | locus848.1 | 791.37 + | 33318122 | 33319070 | 0,0,255 | 1 | 948  | 0 |
| CHR_ALT_CTG | 33332802 | 33333732 | locus850.1 | 765.69 + | 33332802 | 33333732 | 0,0,255 | 1 | 930  | 0 |
| CHR_ALT_CTG | 33348050 | 33348953 | locus852.1 | 749.82 + | 33348050 | 33348953 | 0,0,255 | 1 | 903  | 0 |
| CHR_ALT_CTG | 33350668 | 33351472 | locus853.1 | 654.05 - | 33350668 | 33351472 | 0,0,255 | 1 | 804  | 0 |
| CHR_ALT_CTG | 33360501 | 33361416 | locus855.1 | 747.69 + | 33360501 | 33361416 | 0,0,255 | 1 | 915  | 0 |
| CHR_ALT_CTG | 33373428 | 33374268 | locus856.1 | 677.08 + | 33373428 | 33374268 | 0,0,255 | 1 | 840  | 0 |

|             |          |          |            |          |          |          |         |   |     |   |
|-------------|----------|----------|------------|----------|----------|----------|---------|---|-----|---|
| CHR_ALT_CTG | 33394681 | 33395644 | locus858.1 | 780.97 + | 33394681 | 33395644 | 0,0,255 | 1 | 963 | 0 |
|-------------|----------|----------|------------|----------|----------|----------|---------|---|-----|---|

**Coelacanth**

---

|            |         |         |            |          |         |        |         |   |         |       |
|------------|---------|---------|------------|----------|---------|--------|---------|---|---------|-------|
| JH126572.1 | 1660    | 2485    | locus20.1  | 731.18 + | 1660    | 2485   | 0,0,255 | 1 | 825     | 0     |
| JH126572.1 | 19350   | 20253   | locus21.1  | 741.68 + | 19350   | 20253  | 0,0,255 | 1 | 903     | 0     |
| JH126572.1 | 48890   | 49700   | locus26.1  | 660.1 -  | 48890   | 49700  | 0,0,255 | 1 | 810     | 0     |
| JH126572.1 | 68313   | 69111   | locus27.1  | 654.6 -  | 68313   | 69111  | 0,0,255 | 1 | 798     | 0     |
| JH126572.1 | 371473  | 372460  | locus28.1  | 789.35 + | 371473  | 372460 | 0,0,255 | 1 | 987     | 0     |
| JH127178.1 | 3304    | 4285    | locus131.1 | 794.96 + | 3304    | 4285   | 0,0,255 | 1 | 981     | 0     |
| JH127178.1 | 43758   | 44580   | locus132.1 | 663.86 + | 43758   | 44580  | 0,0,255 | 1 | 822     | 0     |
| JH127178.1 | 199116  | 200004  | locus136.1 | 688.45 + | 199116  | 200004 | 0,0,255 | 2 | 405,471 | 0,417 |
| JH127178.1 | 398452  | 399292  | locus141.1 | 675.39 + | 398452  | 399292 | 0,0,255 | 1 | 840     | 0     |
| JH127178.1 | 441211  | 442123  | locus142.1 | 751.2 -  | 441211  | 442123 | 0,0,255 | 1 | 912     | 0     |
| JH127178.1 | 555152  | 556013  | locus143.1 | 698.43 - | 555152  | 556013 | 0,0,255 | 1 | 861     | 0     |
| JH127178.1 | 625370  | 626363  | locus145.1 | 814.91 - | 625370  | 626363 | 0,0,255 | 1 | 993     | 0     |
| JH127178.1 | 688571  | 689519  | locus147.1 | 781.16 - | 688571  | 689519 | 0,0,255 | 1 | 948     | 0     |
| JH127178.1 | 892366  | 893278  | locus150.1 | 748.03 - | 892366  | 893278 | 0,0,255 | 1 | 912     | 0     |
| JH127178.1 | 1106224 | 1107133 | locus153.1 | 740.34 - | 1106224 | 1E+06  | 0,0,255 | 1 | 909     | 0     |
| JH127874.1 | 146802  | 147708  | locus199.1 | 740.66 - | 146802  | 147708 | 0,0,255 | 1 | 906     | 0     |
| JH127874.1 | 180783  | 181749  | locus200.1 | 791.13 - | 180783  | 181749 | 0,0,255 | 1 | 966     | 0     |
| JH127874.1 | 197051  | 197873  | locus201.1 | 666.56 - | 197051  | 197873 | 0,0,255 | 1 | 822     | 0     |
| JH127874.1 | 306245  | 307157  | locus203.1 | 746.91 - | 306245  | 307157 | 0,0,255 | 1 | 912     | 0     |
| JH127874.1 | 387160  | 388078  | locus205.1 | 757.63 - | 387160  | 388078 | 0,0,255 | 1 | 918     | 0     |
| JH127874.1 | 453413  | 454304  | locus206.1 | 726.88 - | 453413  | 454304 | 0,0,255 | 1 | 891     | 0     |
| JH127874.1 | 487820  | 488777  | locus208.1 | 790.1 -  | 487820  | 488777 | 0,0,255 | 1 | 957     | 0     |
| JH127874.1 | 506541  | 507441  | locus209.1 | 742.35 - | 506541  | 507441 | 0,0,255 | 1 | 900     | 0     |

|            |        |        |            |          |        |        |         |   |      |   |
|------------|--------|--------|------------|----------|--------|--------|---------|---|------|---|
| JH128519.1 | 116280 | 117186 | locus248.1 | 741.83 - | 116280 | 117186 | 0,0,255 | 1 | 906  | 0 |
| JH128519.1 | 188965 | 189877 | locus250.1 | 756.82 - | 188965 | 189877 | 0,0,255 | 1 | 912  | 0 |
| JH128519.1 | 224898 | 225807 | locus251.1 | 753.39 - | 224898 | 225807 | 0,0,255 | 1 | 909  | 0 |
| JH128519.1 | 335001 | 335913 | locus252.1 | 752.03 - | 335001 | 335913 | 0,0,255 | 1 | 912  | 0 |
| JH128519.1 | 369706 | 370615 | locus253.1 | 764.11 - | 369706 | 370615 | 0,0,255 | 1 | 909  | 0 |
| JH128552.1 | 157158 | 158127 | locus261.1 | 800.79 - | 157158 | 158127 | 0,0,255 | 1 | 969  | 0 |
| JH128552.1 | 284063 | 285002 | locus262.1 | 769.07 - | 284063 | 285002 | 0,0,255 | 1 | 939  | 0 |
| JH128635.1 | 151162 | 151984 | locus268.1 | 671.41 + | 151162 | 151984 | 0,0,255 | 1 | 822  | 0 |
| JH128635.1 | 177991 | 178813 | locus269.1 | 665.54 + | 177991 | 178813 | 0,0,255 | 1 | 822  | 0 |
| JH128635.1 | 220401 | 221205 | locus270.1 | 659.63 + | 220401 | 221205 | 0,0,255 | 1 | 804  | 0 |
| JH128635.1 | 244179 | 245097 | locus271.1 | 762.57 + | 244179 | 245097 | 0,0,255 | 1 | 918  | 0 |
| JH128635.1 | 266319 | 267024 | locus272.1 | 654.07 + | 266319 | 267024 | 0,0,255 | 1 | 705  | 0 |
| JH128635.1 | 316205 | 317153 | locus274.1 | 779.83 + | 316205 | 317153 | 0,0,255 | 1 | 948  | 0 |
| JH128635.1 | 334892 | 335801 | locus276.1 | 751.47 + | 334892 | 335801 | 0,0,255 | 1 | 909  | 0 |
| JH128635.1 | 351029 | 351845 | locus277.1 | 666 +    | 351029 | 351845 | 0,0,255 | 1 | 816  | 0 |
| JH128635.1 | 369080 | 369992 | locus278.1 | 747.08 + | 369080 | 369992 | 0,0,255 | 1 | 912  | 0 |
| JH129025.1 | 36670  | 37627  | locus290.1 | 779.51 - | 36670  | 37627  | 0,0,255 | 1 | 957  | 0 |
| JH129025.1 | 150061 | 150883 | locus292.1 | 659.25 - | 150061 | 150883 | 0,0,255 | 1 | 822  | 0 |
| JH129025.1 | 296338 | 297250 | locus294.1 | 744.78 - | 296338 | 297250 | 0,0,255 | 1 | 912  | 0 |
| JH129025.1 | 315192 | 316014 | locus295.1 | 657.34 - | 315192 | 316014 | 0,0,255 | 1 | 822  | 0 |
| JH129158.1 | 46643  | 47465  | locus301.1 | 665.88 - | 46643  | 47465  | 0,0,255 | 1 | 822  | 0 |
| JH129158.1 | 68588  | 69488  | locus302.1 | 737.09 - | 68588  | 69488  | 0,0,255 | 1 | 900  | 0 |
| JH129158.1 | 122796 | 123696 | locus304.1 | 738.76 - | 122796 | 123696 | 0,0,255 | 1 | 900  | 0 |
| JH129158.1 | 147069 | 148185 | locus305.1 | 925.87 - | 147069 | 148185 | 0,0,255 | 1 | 1116 | 0 |

|            |        |        |            |          |        |        |         |   |      |   |
|------------|--------|--------|------------|----------|--------|--------|---------|---|------|---|
| JH129158.1 | 168676 | 169621 | locus306.1 | 775.07 - | 168676 | 169621 | 0,0,255 | 1 | 945  | 0 |
| JH129158.1 | 201631 | 202582 | locus308.1 | 778.93 - | 201631 | 202582 | 0,0,255 | 1 | 951  | 0 |
| JH129158.1 | 219866 | 220778 | locus309.1 | 749.18 - | 219866 | 220778 | 0,0,255 | 1 | 912  | 0 |
| JH129158.1 | 262915 | 263818 | locus311.1 | 740.66 - | 262915 | 263818 | 0,0,255 | 1 | 903  | 0 |
| JH129405.1 | 46480  | 47374  | locus318.1 | 743.84 + | 46480  | 47374  | 0,0,255 | 1 | 894  | 0 |
| JH129405.1 | 65006  | 65828  | locus319.1 | 658.99 + | 65006  | 65828  | 0,0,255 | 1 | 822  | 0 |
| JH129405.1 | 109737 | 110646 | locus320.1 | 737.27 + | 109737 | 110646 | 0,0,255 | 1 | 909  | 0 |
| JH129405.1 | 160614 | 161436 | locus321.1 | 658.49 + | 160614 | 161436 | 0,0,255 | 1 | 822  | 0 |
| JH129405.1 | 224732 | 225554 | locus322.1 | 660.9 +  | 224732 | 225554 | 0,0,255 | 1 | 822  | 0 |
| JH129405.1 | 244984 | 245941 | locus324.1 | 783.13 + | 244984 | 245941 | 0,0,255 | 1 | 957  | 0 |
| JH129411.1 | 1149   | 2052   | locus325.1 | 742.24 - | 1149   | 2052   | 0,0,255 | 1 | 903  | 0 |
| JH129411.1 | 39781  | 40594  | locus327.1 | 662.34 + | 39781  | 40594  | 0,0,255 | 1 | 813  | 0 |
| JH129411.1 | 53068  | 53881  | locus328.1 | 669.5 +  | 53068  | 53881  | 0,0,255 | 1 | 813  | 0 |
| JH129411.1 | 58223  | 59195  | locus329.1 | 812.66 - | 58223  | 59195  | 0,0,255 | 1 | 972  | 0 |
| JH129411.1 | 75954  | 76767  | locus330.1 | 672.81 - | 75954  | 76767  | 0,0,255 | 1 | 813  | 0 |
| JH129411.1 | 104826 | 105624 | locus332.1 | 649.76 + | 104826 | 105624 | 0,0,255 | 1 | 798  | 0 |
| JH129411.1 | 112135 | 112978 | locus333.1 | 680.99 - | 112135 | 112978 | 0,0,255 | 1 | 843  | 0 |
| JH129411.1 | 151203 | 152100 | locus334.1 | 741.54 + | 151203 | 152100 | 0,0,255 | 1 | 897  | 0 |
| JH129411.1 | 159092 | 160079 | locus335.1 | 814.75 - | 159092 | 160079 | 0,0,255 | 1 | 987  | 0 |
| JH129675.1 | 198759 | 199656 | locus341.1 | 742.66 + | 198759 | 199656 | 0,0,255 | 1 | 897  | 0 |
| JH130005.1 | 14273  | 15185  | locus346.1 | 743.06 + | 14273  | 15185  | 0,0,255 | 1 | 912  | 0 |
| JH130005.1 | 29657  | 30476  | locus347.1 | 669.51 + | 29657  | 30476  | 0,0,255 | 1 | 819  | 0 |
| JH130005.1 | 95436  | 96579  | locus349.1 | 943.01 + | 95436  | 96579  | 0,0,255 | 1 | 1143 | 0 |
| JH130034.1 | 33862  | 34774  | locus350.1 | 748.52 - | 33862  | 34774  | 0,0,255 | 1 | 912  | 0 |

|              |        |        |            |          |        |        |         |   |     |   |
|--------------|--------|--------|------------|----------|--------|--------|---------|---|-----|---|
| JH130034.1   | 105499 | 106321 | locus351.1 | 694.56 + | 105499 | 106321 | 0,0,255 | 1 | 822 | 0 |
| JH130241.1   | 69336  | 70233  | locus352.1 | 747.86 + | 69336  | 70233  | 0,0,255 | 1 | 897 | 0 |
| JH130241.1   | 93697  | 94624  | locus353.1 | 752.88 + | 93697  | 94624  | 0,0,255 | 1 | 927 | 0 |
| JH130857.1   | 96     | 1059   | locus361.1 | 790.63 + | 96     | 1059   | 0,0,255 | 1 | 963 | 0 |
| JH130857.1   | 50871  | 51774  | locus362.1 | 739.24 + | 50871  | 51774  | 0,0,255 | 1 | 903 | 0 |
| JH131058.1   | 22511  | 23402  | locus365.1 | 727.14 - | 22511  | 23402  | 0,0,255 | 1 | 891 | 0 |
| JH131250.1   | 18165  | 19140  | locus370.1 | 807.26 + | 18165  | 19140  | 0,0,255 | 1 | 975 | 0 |
| JH131452.1   | 20233  | 21145  | locus373.1 | 754.96 - | 20233  | 21145  | 0,0,255 | 1 | 912 | 0 |
| JH131509.1   | 14057  | 14876  | locus374.1 | 660.9 +  | 14057  | 14876  | 0,0,255 | 1 | 819 | 0 |
| JH131653.1   | 7876   | 8698   | locus375.1 | 669.88 - | 7876   | 8698   | 0,0,255 | 1 | 822 | 0 |
| JH131709.1   | 6287   | 7235   | locus377.1 | 765.71 - | 6287   | 7235   | 0,0,255 | 1 | 948 | 0 |
| JH131961.1   | 2494   | 3442   | locus380.1 | 775.96 + | 2494   | 3442   | 0,0,255 | 1 | 948 | 0 |
| JH132926.1   | 10416  | 11319  | locus388.1 | 739.11 + | 10416  | 11319  | 0,0,255 | 1 | 903 | 0 |
| JH133047.1   | 3187   | 4009   | locus389.1 | 657.73 + | 3187   | 4009   | 0,0,255 | 1 | 822 | 0 |
| AFYH0127316! | 2923   | 3871   | locus395.1 | 781.77 - | 2923   | 3871   | 0,0,255 | 1 | 948 | 0 |
| AFYH0127679! | 3638   | 4595   | locus404.1 | 783.83 - | 3638   | 4595   | 0,0,255 | 1 | 957 | 0 |
| AFYH0129023! | 206    | 1118   | locus412.1 | 742.53 - | 206    | 1118   | 0,0,255 | 1 | 912 | 0 |
| AFYH0129139! | 12     | 990    | locus413.1 | 801.58 + | 12     | 990    | 0,0,255 | 1 | 978 | 0 |

**Western clawed frog**

|             |         |         |           |        |   |         |         |         |   |      |   |
|-------------|---------|---------|-----------|--------|---|---------|---------|---------|---|------|---|
| NC_030677.2 | 835521  | 836406  | locus2.1  | 637.43 | + | 835521  | 836406  | 0,0,255 | 1 | 885  | 0 |
| NC_030677.2 | 878688  | 879573  | locus3.1  | 641.43 | + | 878688  | 879573  | 0,0,255 | 1 | 885  | 0 |
| NC_030677.2 | 922748  | 923624  | locus4.1  | 633.93 | + | 922748  | 923624  | 0,0,255 | 1 | 876  | 0 |
| NC_030677.2 | 966988  | 967894  | locus5.1  | 629.43 | - | 966988  | 967894  | 0,0,255 | 1 | 906  | 0 |
| NC_030677.2 | 978999  | 979872  | locus6.1  | 631.43 | - | 978999  | 979872  | 0,0,255 | 1 | 873  | 0 |
| NC_030677.2 | 1036057 | 1036933 | locus8.1  | 628.43 | - | 1036057 | 1036933 | 0,0,255 | 1 | 876  | 0 |
| NC_030677.2 | 1054632 | 1055574 | locus9.1  | 633.92 | - | 1054632 | 1055574 | 0,0,255 | 1 | 942  | 0 |
| NC_030677.2 | 1190223 | 1191147 | locus11.1 | 639.22 | - | 1190223 | 1191147 | 0,0,255 | 1 | 924  | 0 |
| NC_030677.2 | 1227192 | 1228062 | locus12.1 | 637.22 | - | 1227192 | 1228062 | 0,0,255 | 1 | 870  | 0 |
| NC_030677.2 | 1261421 | 1262291 | locus13.1 | 637.22 | - | 1261421 | 1262291 | 0,0,255 | 1 | 870  | 0 |
| NC_030677.2 | 1306926 | 1307853 | locus14.1 | 650.41 | - | 1306926 | 1307853 | 0,0,255 | 1 | 927  | 0 |
| NC_030677.2 | 1327276 | 1328146 | locus15.1 | 640.92 | - | 1327276 | 1328146 | 0,0,255 | 1 | 870  | 0 |
| NC_030677.2 | 1384714 | 1385695 | locus16.1 | 634.93 | - | 1384714 | 1385695 | 0,0,255 | 1 | 981  | 0 |
| NC_030677.2 | 1403382 | 1404261 | locus17.1 | 633.22 | - | 1403382 | 1404261 | 0,0,255 | 1 | 879  | 0 |
| NC_030677.2 | 1425079 | 1426057 | locus18.1 | 633.43 | - | 1425079 | 1426057 | 0,0,255 | 1 | 978  | 0 |
| NC_030677.2 | 1450650 | 1451454 | locus19.1 | 566.51 | - | 1450650 | 1451454 | 0,0,255 | 1 | 804  | 0 |
| NC_030677.2 | 1468775 | 1469648 | locus20.1 | 646.41 | - | 1468775 | 1469648 | 0,0,255 | 1 | 873  | 0 |
| NC_030677.2 | 1517986 | 1518880 | locus21.1 | 629.43 | - | 1517986 | 1518880 | 0,0,255 | 1 | 894  | 0 |
| NC_030677.2 | 1540752 | 1541622 | locus22.1 | 620.93 | - | 1540752 | 1541622 | 0,0,255 | 1 | 870  | 0 |
| NC_030677.2 | 1560142 | 1560970 | locus23.1 | 629.92 | - | 1560142 | 1560970 | 0,0,255 | 1 | 828  | 0 |
| NC_030677.2 | 1636094 | 1637054 | locus24.1 | 621.43 | - | 1636094 | 1637054 | 0,0,255 | 1 | 960  | 0 |
| NC_030677.2 | 1662244 | 1663204 | locus25.1 | 617.94 | - | 1662244 | 1663204 | 0,0,255 | 1 | 960  | 0 |
| NC_030677.2 | 1699111 | 1700077 | locus26.1 | 633.42 | - | 1699111 | 1700077 | 0,0,255 | 1 | 966  | 0 |
| NC_030677.2 | 1736883 | 1737756 | locus27.1 | 621.43 | - | 1736883 | 1737756 | 0,0,255 | 1 | 873  | 0 |
| NC_030677.2 | 1774370 | 1775381 | locus28.1 | 620.44 | - | 1774370 | 1775381 | 0,0,255 | 1 | 1011 | 0 |
| NC_030677.2 | 1789862 | 1790735 | locus29.1 | 628.42 | - | 1789862 | 1790735 | 0,0,255 | 1 | 873  | 0 |
| NC_030677.2 | 1809246 | 1810119 | locus30.1 | 617.93 | - | 1809246 | 1810119 | 0,0,255 | 1 | 873  | 0 |
| NC_030677.2 | 1829973 | 1830846 | locus31.1 | 634.93 | - | 1829973 | 1830846 | 0,0,255 | 1 | 873  | 0 |
| NC_030677.2 | 1851224 | 1852097 | locus32.1 | 630.92 | - | 1851224 | 1852097 | 0,0,255 | 1 | 873  | 0 |
| NC_030677.2 | 1906882 | 1907761 | locus33.1 | 641.92 | - | 1906882 | 1907761 | 0,0,255 | 1 | 879  | 0 |
| NC_030677.2 | 1928336 | 1929215 | locus34.1 | 606.93 | - | 1928336 | 1929215 | 0,0,255 | 1 | 879  | 0 |
| NC_030677.2 | 1976970 | 1977888 | locus35.1 | 622.43 | + | 1976970 | 1977888 | 0,0,255 | 1 | 918  | 0 |
| NC_030677.2 | 1983496 | 1984372 | locus36.1 | 645.42 | - | 1983496 | 1984372 | 0,0,255 | 1 | 876  | 0 |
| NC_030677.2 | 2037099 | 2037981 | locus37.1 | 607.73 | + | 2037099 | 2037981 | 0,0,255 | 1 | 882  | 0 |
| NC_030677.2 | 2053097 | 2053973 | locus38.1 | 641.92 | - | 2053097 | 2053973 | 0,0,255 | 1 | 876  | 0 |
| NC_030677.2 | 2068837 | 2069719 | locus39.1 | 610.65 | - | 2068837 | 2069719 | 0,0,255 | 1 | 882  | 0 |
| NC_030677.2 | 2101674 | 2102556 | locus40.1 | 614.65 | - | 2101674 | 2102556 | 0,0,255 | 1 | 882  | 0 |
| NC_030677.2 | 2145356 | 2146238 | locus41.1 | 617.65 | - | 2145356 | 2146238 | 0,0,255 | 1 | 882  | 0 |
| NC_030677.2 | 2179456 | 2180338 | locus42.1 | 615.15 | - | 2179456 | 2180338 | 0,0,255 | 1 | 882  | 0 |
| NC_030677.2 | 2215653 | 2216535 | locus43.1 | 613.15 | - | 2215653 | 2216535 | 0,0,255 | 1 | 882  | 0 |
| NC_030677.2 | 2254398 | 2255280 | locus44.1 | 619.14 | - | 2254398 | 2255280 | 0,0,255 | 1 | 882  | 0 |
| NC_030677.2 | 2285226 | 2286108 | locus45.1 | 610.15 | - | 2285226 | 2286108 | 0,0,255 | 1 | 882  | 0 |
| NC_030677.2 | 2329873 | 2330755 | locus46.1 | 617.65 | - | 2329873 | 2330755 | 0,0,255 | 1 | 882  | 0 |



|             |         |         |           |        |   |         |         |         |   |      |   |
|-------------|---------|---------|-----------|--------|---|---------|---------|---------|---|------|---|
| NC_030677.2 | 2353559 | 2354441 | locus47.1 | 621.14 | - | 2353559 | 2354441 | 0,0,255 | 1 | 882  | 0 |
| NC_030677.2 | 2395332 | 2396208 | locus48.1 | 616.15 | - | 2395332 | 2396208 | 0,0,255 | 1 | 876  | 0 |
| NC_030677.2 | 2431892 | 2432744 | locus49.1 | 560.01 | + | 2431892 | 2432744 | 0,0,255 | 1 | 852  | 0 |
| NC_030677.2 | 2451984 | 2452863 | locus50.1 | 636.93 | + | 2451984 | 2452863 | 0,0,255 | 1 | 879  | 0 |
| NC_030677.2 | 2493040 | 2493922 | locus51.1 | 618.15 | + | 2493040 | 2493922 | 0,0,255 | 1 | 882  | 0 |
| NC_030677.2 | 2539886 | 2540768 | locus52.1 | 616.65 | + | 2539886 | 2540768 | 0,0,255 | 1 | 882  | 0 |
| NC_030677.2 | 2549561 | 2550467 | locus53.1 | 628.91 | - | 2549561 | 2550467 | 0,0,255 | 1 | 906  | 0 |
| NC_030677.2 | 2568567 | 2569446 | locus54.1 | 632.91 | - | 2568567 | 2569446 | 0,0,255 | 1 | 879  | 0 |
| NC_030677.2 | 2584831 | 2585710 | locus55.1 | 626.43 | - | 2584831 | 2585710 | 0,0,255 | 1 | 879  | 0 |
| NC_030677.2 | 2603686 | 2604565 | locus56.1 | 627.42 | - | 2603686 | 2604565 | 0,0,255 | 1 | 879  | 0 |
| NC_030677.2 | 2619302 | 2620181 | locus57.1 | 630.93 | - | 2619302 | 2620181 | 0,0,255 | 1 | 879  | 0 |
| NC_030677.2 | 2655549 | 2656422 | locus58.1 | 638.42 | - | 2655549 | 2656422 | 0,0,255 | 1 | 873  | 0 |
| NC_030677.2 | 2701255 | 2702128 | locus59.1 | 635.42 | - | 2701255 | 2702128 | 0,0,255 | 1 | 873  | 0 |
| NC_030677.2 | 2742536 | 2743409 | locus60.1 | 626.93 | - | 2742536 | 2743409 | 0,0,255 | 1 | 873  | 0 |
| NC_030677.2 | 2769007 | 2769883 | locus61.1 | 622.42 | + | 2769007 | 2769883 | 0,0,255 | 1 | 876  | 0 |
| NC_030677.2 | 2777561 | 2778500 | locus62.1 | 647.41 | - | 2777561 | 2778500 | 0,0,255 | 1 | 939  | 0 |
| NC_030677.2 | 2821628 | 2822522 | locus63.1 | 644.9  | - | 2822522 | 2822522 | 0,0,255 | 1 | 894  | 0 |
| NC_030677.2 | 2854856 | 2855753 | locus64.1 | 654.91 | - | 2854856 | 2855753 | 0,0,255 | 1 | 897  | 0 |
| NC_030677.2 | 2868389 | 2869286 | locus65.1 | 649.91 | - | 2868389 | 2869286 | 0,0,255 | 1 | 897  | 0 |
| NC_030677.2 | 2892540 | 2893413 | locus66.1 | 633.14 | - | 2892540 | 2893413 | 0,0,255 | 1 | 873  | 0 |
| NC_030677.2 | 2921145 | 2922048 | locus67.1 | 480.99 | - | 2921145 | 2922048 | 0,0,255 | 1 | 903  | 0 |
| NC_030677.2 | 2946553 | 2947456 | locus68.1 | 476.49 | - | 2946553 | 2947456 | 0,0,255 | 1 | 903  | 0 |
| NC_030677.2 | 2975104 | 2975983 | locus69.1 | 629.92 | - | 2975104 | 2975983 | 0,0,255 | 1 | 879  | 0 |
| NC_030677.2 | 2992226 | 2993168 | locus70.1 | 620.42 | - | 2992226 | 2993168 | 0,0,255 | 1 | 942  | 0 |
| NC_030677.2 | 3018161 | 3019037 | locus71.1 | 613.94 | - | 3018161 | 3019037 | 0,0,255 | 1 | 876  | 0 |
| NC_030677.2 | 3039623 | 3040496 | locus72.1 | 633.42 | - | 3039623 | 3040496 | 0,0,255 | 1 | 873  | 0 |
| NC_030677.2 | 3069791 | 3070664 | locus73.1 | 633.42 | - | 3069791 | 3070664 | 0,0,255 | 1 | 873  | 0 |
| NC_030677.2 | 3116380 | 3117253 | locus74.1 | 629.92 | - | 3116380 | 3117253 | 0,0,255 | 1 | 873  | 0 |
| NC_030677.2 | 3142185 | 3143121 | locus75.1 | 630.92 | - | 3142185 | 3143121 | 0,0,255 | 1 | 936  | 0 |
| NC_030677.2 | 3160182 | 3161115 | locus76.1 | 641.91 | - | 3160182 | 3161115 | 0,0,255 | 1 | 933  | 0 |
| NC_030677.2 | 3198220 | 3199114 | locus77.1 | 614.43 | - | 3198220 | 3199114 | 0,0,255 | 1 | 894  | 0 |
| NC_030677.2 | 3208838 | 3209732 | locus78.1 | 605.94 | - | 3208838 | 3209732 | 0,0,255 | 1 | 894  | 0 |
| NC_030677.2 | 3221271 | 3222129 | locus79.1 | 609.93 | - | 3221271 | 3222129 | 0,0,255 | 1 | 858  | 0 |
| NC_030677.2 | 3249544 | 3250438 | locus80.1 | 615.92 | - | 3249544 | 3250438 | 0,0,255 | 1 | 894  | 0 |
| NC_030677.2 | 3280645 | 3281539 | locus81.1 | 608.43 | - | 3280645 | 3281539 | 0,0,255 | 1 | 894  | 0 |
| NC_030677.2 | 3303980 | 3304856 | locus82.1 | 639.91 | - | 3303980 | 3304856 | 0,0,255 | 1 | 876  | 0 |
| NC_030677.2 | 3339154 | 3340030 | locus83.1 | 637.92 | - | 3339154 | 3340030 | 0,0,255 | 1 | 876  | 0 |
| NC_030677.2 | 3358019 | 3359024 | locus84.1 | 639.92 | - | 3358019 | 3359024 | 0,0,255 | 1 | 1005 | 0 |
| NC_030677.2 | 3389547 | 3390420 | locus85.1 | 625.72 | - | 3389547 | 3390420 | 0,0,255 | 1 | 873  | 0 |
| NC_030677.2 | 3424640 | 3425447 | locus86.1 | 638.42 | - | 3424640 | 3425447 | 0,0,255 | 1 | 807  | 0 |
| NC_030677.2 | 3440294 | 3441188 | locus87.1 | 623.42 | - | 3440294 | 3441188 | 0,0,255 | 1 | 894  | 0 |
| NC_030677.2 | 3459493 | 3460471 | locus88.1 | 611.43 | - | 3459493 | 3460471 | 0,0,255 | 1 | 978  | 0 |
| NC_030677.2 | 3481486 | 3482329 | locus89.1 | 644.91 | - | 3481486 | 3482329 | 0,0,255 | 1 | 843  | 0 |
| NC_030677.2 | 3495126 | 3496029 | locus90.1 | 599.47 | - | 3495126 | 3496029 | 0,0,255 | 1 | 903  | 0 |

|             |         |         |            |        |   |         |         |         |   |     |   |
|-------------|---------|---------|------------|--------|---|---------|---------|---------|---|-----|---|
| NC_030677.2 | 3514380 | 3515283 | locus91.1  | 583.48 | - | 3514380 | 3515283 | 0,0,255 | 1 | 903 | 0 |
| NC_030677.2 | 3549805 | 3550699 | locus92.1  | 574.49 | - | 3549805 | 3550699 | 0,0,255 | 1 | 894 | 0 |
| NC_030677.2 | 3594496 | 3595399 | locus93.1  | 574.99 | - | 3594496 | 3595399 | 0,0,255 | 1 | 903 | 0 |
| NC_030677.2 | 3632369 | 3633272 | locus94.1  | 576.49 | - | 3632369 | 3633272 | 0,0,255 | 1 | 903 | 0 |
| NC_030677.2 | 3667415 | 3668309 | locus95.1  | 572.49 | - | 3667415 | 3668309 | 0,0,255 | 1 | 894 | 0 |
| NC_030677.2 | 3706490 | 3707384 | locus96.1  | 580.98 | - | 3706490 | 3707384 | 0,0,255 | 1 | 894 | 0 |
| NC_030677.2 | 3760561 | 3761497 | locus97.1  | 497.98 | - | 3760561 | 3761497 | 0,0,255 | 1 | 936 | 0 |
| NC_030677.2 | 3787950 | 3788865 | locus98.1  | 466.48 | + | 3787950 | 3788865 | 0,0,255 | 1 | 915 | 0 |
| NC_030677.2 | 3806621 | 3807524 | locus100.1 | 582.44 | + | 3806621 | 3807524 | 0,0,255 | 1 | 903 | 0 |
| NC_030677.2 | 3821903 | 3822806 | locus101.1 | 492.47 | + | 3821903 | 3822806 | 0,0,255 | 1 | 903 | 0 |
| NC_030677.2 | 3858541 | 3859444 | locus102.1 | 477.99 | + | 3858541 | 3859444 | 0,0,255 | 1 | 903 | 0 |
| NC_030677.2 | 3873752 | 3874652 | locus103.1 | 484.98 | + | 3873752 | 3874652 | 0,0,255 | 1 | 900 | 0 |
| NC_030677.2 | 3887777 | 3888674 | locus104.1 | 623.92 | - | 3887777 | 3888674 | 0,0,255 | 1 | 897 | 0 |
| NC_030677.2 | 3935515 | 3936469 | locus105.1 | 627.92 | + | 3935515 | 3936469 | 0,0,255 | 1 | 954 | 0 |
| NC_030677.2 | 3956234 | 3957110 | locus106.1 | 636.41 | + | 3956234 | 3957110 | 0,0,255 | 1 | 876 | 0 |
| NC_030677.2 | 3980795 | 3981716 | locus107.1 | 628.42 | + | 3980795 | 3981716 | 0,0,255 | 1 | 921 | 0 |
| NC_030677.2 | 3984076 | 3985012 | locus108.1 | 502.98 | - | 3984076 | 3985012 | 0,0,255 | 1 | 936 | 0 |
| NC_030677.2 | 4036195 | 4037128 | locus109.1 | 627.92 | + | 4036195 | 4037128 | 0,0,255 | 1 | 933 | 0 |
| NC_030677.2 | 4065319 | 4066195 | locus110.1 | 623.73 | + | 4065319 | 4066195 | 0,0,255 | 1 | 876 | 0 |
| NC_030677.2 | 4116921 | 4117818 | locus111.1 | 629.92 | + | 4116921 | 4117818 | 0,0,255 | 1 | 897 | 0 |
| NC_030677.2 | 4146605 | 4147502 | locus112.1 | 627.42 | + | 4146605 | 4147502 | 0,0,255 | 1 | 897 | 0 |
| NC_030677.2 | 4201613 | 4202510 | locus113.1 | 634.42 | + | 4201613 | 4202510 | 0,0,255 | 1 | 897 | 0 |
| NC_030677.2 | 4240714 | 4241608 | locus114.1 | 637.92 | + | 4240714 | 4241608 | 0,0,255 | 1 | 894 | 0 |
| NC_030677.2 | 4282340 | 4283213 | locus115.1 | 630.41 | + | 4282340 | 4283213 | 0,0,255 | 1 | 873 | 0 |
| NC_030677.2 | 4306664 | 4307537 | locus116.1 | 628.91 | + | 4306664 | 4307537 | 0,0,255 | 1 | 873 | 0 |
| NC_030677.2 | 4332295 | 4333168 | locus117.1 | 631.91 | + | 4332295 | 4333168 | 0,0,255 | 1 | 873 | 0 |
| NC_030677.2 | 4361025 | 4361889 | locus118.1 | 637.41 | + | 4361025 | 4361889 | 0,0,255 | 1 | 864 | 0 |
| NC_030677.2 | 4375708 | 4376581 | locus120.1 | 616.93 | - | 4375708 | 4376581 | 0,0,255 | 1 | 873 | 0 |
| NC_030677.2 | 4413199 | 4414078 | locus121.1 | 630.42 | + | 4413199 | 4414078 | 0,0,255 | 1 | 879 | 0 |
| NC_030677.2 | 4424790 | 4425669 | locus122.1 | 654.41 | - | 4424790 | 4425669 | 0,0,255 | 1 | 879 | 0 |
| NC_030677.2 | 4452458 | 4453451 | locus123.1 | 629.42 | - | 4452458 | 4453451 | 0,0,255 | 1 | 993 | 0 |
| NC_030677.2 | 4480290 | 4481073 | locus124.1 | 620.72 | - | 4480290 | 4481073 | 0,0,255 | 1 | 783 | 0 |
| NC_030677.2 | 4532903 | 4533800 | locus126.1 | 497.48 | - | 4532903 | 4533800 | 0,0,255 | 1 | 897 | 0 |
| NC_030677.2 | 4605693 | 4606563 | locus127.1 | 626.42 | - | 4605693 | 4606563 | 0,0,255 | 1 | 870 | 0 |
| NC_030677.2 | 4636237 | 4637035 | locus128.1 | 619.2  | - | 4636237 | 4637035 | 0,0,255 | 1 | 798 | 0 |
| NC_030677.2 | 4662954 | 4663860 | locus129.1 | 491.99 | - | 4662954 | 4663860 | 0,0,255 | 1 | 906 | 0 |
| NC_030677.2 | 4716277 | 4717177 | locus130.1 | 483.03 | + | 4716277 | 4717177 | 0,0,255 | 1 | 900 | 0 |
| NC_030677.2 | 4776011 | 4776911 | locus131.1 | 489.77 | + | 4776011 | 4776911 | 0,0,255 | 1 | 900 | 0 |
| NC_030677.2 | 4808558 | 4809458 | locus132.1 | 494.77 | + | 4808558 | 4809458 | 0,0,255 | 1 | 900 | 0 |
| NC_030677.2 | 4846804 | 4847704 | locus133.1 | 482.77 | + | 4846804 | 4847704 | 0,0,255 | 1 | 900 | 0 |
| NC_030677.2 | 4861408 | 4862305 | locus134.1 | 632.41 | - | 4861408 | 4862305 | 0,0,255 | 1 | 897 | 0 |
| NC_030677.2 | 4890474 | 4891428 | locus135.1 | 630.42 | - | 4890474 | 4891428 | 0,0,255 | 1 | 954 | 0 |
| NC_030677.2 | 5015936 | 5016833 | locus136.1 | 640.42 | - | 5015936 | 5016833 | 0,0,255 | 1 | 897 | 0 |
| NC_030677.2 | 5071397 | 5072303 | locus138.1 | 499.48 | - | 5071397 | 5072303 | 0,0,255 | 1 | 906 | 0 |

|             |         |         |            |          |         |         |         |   |           |                   |
|-------------|---------|---------|------------|----------|---------|---------|---------|---|-----------|-------------------|
| NC_030677.2 | 5103811 | 5104612 | locus139.1 | 459.91 - | 5103811 | 5104612 | 0,0,255 | 1 | 801       | 0                 |
| NC_030677.2 | 5147625 | 5148531 | locus140.1 | 486.49 + | 5147625 | 5148531 | 0,0,255 | 1 | 906       | 0                 |
| NC_030677.2 | 5197550 | 5198456 | locus141.1 | 474.99 + | 5197550 | 5198456 | 0,0,255 | 1 | 906       | 0                 |
| NC_030677.2 | 5206604 | 5207510 | locus142.1 | 497.96 - | 5206604 | 5207510 | 0,0,255 | 1 | 906       | 0                 |
| NC_030677.2 | 5249709 | 5250585 | locus144.1 | 642.41 + | 5249709 | 5250585 | 0,0,255 | 1 | 876       | 0                 |
| NC_030677.2 | 5279106 | 5280000 | locus145.1 | 635.91 + | 5279106 | 5280000 | 0,0,255 | 1 | 894       | 0                 |
| NC_030677.2 | 5306749 | 5307646 | locus146.1 | 629.41 + | 5306749 | 5307646 | 0,0,255 | 1 | 897       | 0                 |
| NC_030677.2 | 5311195 | 5312095 | locus148.1 | 489.77 - | 5311195 | 5312095 | 0,0,255 | 1 | 900       | 0                 |
| NC_030677.2 | 5348557 | 5349457 | locus149.1 | 493.77 - | 5348557 | 5349457 | 0,0,255 | 1 | 900       | 0                 |
| NC_030677.2 | 5396571 | 5397471 | locus150.1 | 495.77 - | 5396571 | 5397471 | 0,0,255 | 1 | 900       | 0                 |
| NC_030677.2 | 5442351 | 5443182 | locus151.1 | 611.93 - | 5442351 | 5443182 | 0,0,255 | 1 | 831       | 0                 |
| NC_030677.2 | 5460272 | 5461103 | locus152.1 | 616.93 - | 5460272 | 5461103 | 0,0,255 | 1 | 831       | 0                 |
| NC_030677.2 | 5478893 | 5479724 | locus153.1 | 498.47 - | 5478893 | 5479724 | 0,0,255 | 1 | 831       | 0                 |
| NC_030677.2 | 5499045 | 5499876 | locus154.1 | 508.97 - | 5499045 | 5499876 | 0,0,255 | 1 | 831       | 0                 |
| NC_030677.2 | 5529137 | 5551850 | locus156.1 | 577.04 - | 5529137 | 5551850 | 0,0,255 | 4 | 822,8,7,9 | 0,868,12696,22704 |
| NC_030677.2 | 5584329 | 5585208 | locus157.1 | 639.91 + | 5584329 | 5585208 | 0,0,255 | 1 | 879       | 0                 |
| NC_030677.2 | 5617299 | 5618178 | locus158.1 | 646.41 + | 5617299 | 5618178 | 0,0,255 | 1 | 879       | 0                 |
| NC_030677.2 | 5658779 | 5659787 | locus159.1 | 634.92 + | 5658779 | 5659787 | 0,0,255 | 1 | 1008      | 0                 |
| NC_030677.2 | 5691252 | 5692146 | locus160.1 | 633.91 + | 5691252 | 5692146 | 0,0,255 | 1 | 894       | 0                 |
| NC_030677.2 | 5731978 | 5732947 | locus161.1 | 625.42 + | 5731978 | 5732947 | 0,0,255 | 1 | 969       | 0                 |
| NC_030677.2 | 5776826 | 5777717 | locus162.1 | 625.93 + | 5776826 | 5777717 | 0,0,255 | 1 | 891       | 0                 |
| NC_030677.2 | 5799201 | 5800035 | locus163.1 | 645.91 + | 5799201 | 5800035 | 0,0,255 | 1 | 834       | 0                 |
| NC_030677.2 | 5838950 | 5839829 | locus164.1 | 702.89 + | 5838950 | 5839829 | 0,0,255 | 1 | 879       | 0                 |
| NC_030677.2 | 5866601 | 5867492 | locus165.1 | 686.4 +  | 5866601 | 5867492 | 0,0,255 | 1 | 891       | 0                 |
| NC_030677.2 | 5889423 | 5890302 | locus166.1 | 603.44 + | 5889423 | 5890302 | 0,0,255 | 1 | 879       | 0                 |
| NC_030677.2 | 5900397 | 5901273 | locus167.1 | 636.41 + | 5900397 | 5901273 | 0,0,255 | 1 | 876       | 0                 |
| NC_030677.2 | 5938585 | 5939485 | locus168.1 | 491.77 + | 5938585 | 5939485 | 0,0,255 | 1 | 900       | 0                 |
| NC_030677.2 | 5964465 | 5965359 | locus169.1 | 638.92 - | 5964465 | 5965359 | 0,0,255 | 1 | 894       | 0                 |
| NC_030677.2 | 5980729 | 5981626 | locus170.1 | 640.91 - | 5980729 | 5981626 | 0,0,255 | 1 | 897       | 0                 |
| NC_030677.2 | 6051208 | 6052114 | locus172.1 | 475.98 + | 6051208 | 6052114 | 0,0,255 | 1 | 906       | 0                 |
| NC_030677.2 | 6060145 | 6061051 | locus173.1 | 488.48 + | 6060145 | 6061051 | 0,0,255 | 1 | 906       | 0                 |
| NC_030677.2 | 6088582 | 6089488 | locus174.1 | 493.48 + | 6088582 | 6089488 | 0,0,255 | 1 | 906       | 0                 |
| NC_030677.2 | 6097290 | 6098196 | locus175.1 | 482.99 + | 6097290 | 6098196 | 0,0,255 | 1 | 906       | 0                 |
| NC_030677.2 | 6112030 | 6112936 | locus176.1 | 486.48 + | 6112030 | 6112936 | 0,0,255 | 1 | 906       | 0                 |
| NC_030677.2 | 6141782 | 6142709 | locus177.1 | 482.49 + | 6141782 | 6142709 | 0,0,255 | 1 | 927       | 0                 |
| NC_030677.2 | 6165663 | 6166569 | locus178.1 | 492.99 + | 6165663 | 6166569 | 0,0,255 | 1 | 906       | 0                 |
| NC_030677.2 | 6213981 | 6214887 | locus180.1 | 501.47 - | 6213981 | 6214887 | 0,0,255 | 1 | 906       | 0                 |
| NC_030677.2 | 6267901 | 6268831 | locus183.1 | 495.47 + | 6267901 | 6268831 | 0,0,255 | 1 | 930       | 0                 |
| NC_030677.2 | 6317180 | 6318077 | locus184.1 | 488.48 + | 6317180 | 6318077 | 0,0,255 | 1 | 897       | 0                 |
| NC_030677.2 | 6353631 | 6354414 | locus185.1 | 619.72 + | 6353631 | 6354414 | 0,0,255 | 1 | 783       | 0                 |
| NC_030677.2 | 6418203 | 6418986 | locus187.1 | 624.92 + | 6418203 | 6418986 | 0,0,255 | 1 | 783       | 0                 |
| NC_030677.2 | 6474834 | 6475785 | locus188.1 | 639.41 + | 6474834 | 6475785 | 0,0,255 | 1 | 951       | 0                 |
| NC_030677.2 | 6570546 | 6571443 | locus190.1 | 625.93 - | 6570546 | 6571443 | 0,0,255 | 1 | 897       | 0                 |
| NC_030677.2 | 6643516 | 6644446 | locus191.1 | 640.41 + | 6643516 | 6644446 | 0,0,255 | 1 | 930       | 0                 |

|             |         |         |            |        |   |         |         |         |   |      |   |
|-------------|---------|---------|------------|--------|---|---------|---------|---------|---|------|---|
| NC_030677.2 | 6678414 | 6679314 | locus192.1 | 703.62 | + | 6678414 | 6679314 | 0,0,255 | 1 | 900  | 0 |
| NC_030677.2 | 6689068 | 6690076 | locus193.1 | 620.71 | + | 6689068 | 6690076 | 0,0,255 | 1 | 1008 | 0 |
| NC_030677.2 | 6939211 | 6940171 | locus194.1 | 622.92 | + | 6939211 | 6940171 | 0,0,255 | 1 | 960  | 0 |
| NC_030677.2 | 6964861 | 6965659 | locus195.1 | 619.43 | + | 6964861 | 6965659 | 0,0,255 | 1 | 798  | 0 |
| NC_030677.2 | 6971533 | 6972514 | locus196.1 | 605.44 | - | 6971533 | 6972514 | 0,0,255 | 1 | 981  | 0 |
| NC_030677.2 | 6997627 | 6998608 | locus197.1 | 595.95 | - | 6997627 | 6998608 | 0,0,255 | 1 | 981  | 0 |
| NC_030677.2 | 7037919 | 7038813 | locus198.1 | 619.93 | - | 7037919 | 7038813 | 0,0,255 | 1 | 894  | 0 |
| NC_030677.2 | 7056246 | 7057143 | locus199.1 | 614.43 | - | 7056246 | 7057143 | 0,0,255 | 1 | 897  | 0 |
| NC_030677.2 | 7071603 | 7072500 | locus200.1 | 625.43 | - | 7071603 | 7072500 | 0,0,255 | 1 | 897  | 0 |
| NC_030677.2 | 7128878 | 7129802 | locus202.1 | 511.97 | + | 7128878 | 7129802 | 0,0,255 | 1 | 924  | 0 |
| NC_030677.2 | 7156126 | 7156924 | locus203.1 | 612.97 | + | 7156126 | 7156924 | 0,0,255 | 1 | 798  | 0 |
| NC_030677.2 | 7190191 | 7191067 | locus204.1 | 638.41 | + | 7190191 | 7191067 | 0,0,255 | 1 | 876  | 0 |
| NC_030677.2 | 7223913 | 7224789 | locus205.1 | 638.41 | + | 7223913 | 7224789 | 0,0,255 | 1 | 876  | 0 |
| NC_030677.2 | 7254821 | 7255697 | locus206.1 | 635.41 | + | 7254821 | 7255697 | 0,0,255 | 1 | 876  | 0 |
| NC_030677.2 | 7275315 | 7276191 | locus207.1 | 633.91 | + | 7275315 | 7276191 | 0,0,255 | 1 | 876  | 0 |
| NC_030677.2 | 7296340 | 7297216 | locus208.1 | 631.92 | + | 7296340 | 7297216 | 0,0,255 | 1 | 876  | 0 |
| NC_030677.2 | 7316177 | 7317053 | locus209.1 | 633.42 | + | 7316177 | 7317053 | 0,0,255 | 1 | 876  | 0 |
| NC_030677.2 | 7353454 | 7354330 | locus210.1 | 629.92 | + | 7353454 | 7354330 | 0,0,255 | 1 | 876  | 0 |
| NC_030677.2 | 7388298 | 7389174 | locus211.1 | 636.41 | + | 7388298 | 7389174 | 0,0,255 | 1 | 876  | 0 |
| NC_030677.2 | 7418154 | 7419027 | locus212.1 | 635.43 | + | 7418154 | 7419027 | 0,0,255 | 1 | 873  | 0 |
| NC_030677.2 | 7460584 | 7461460 | locus213.1 | 622.44 | + | 7460584 | 7461460 | 0,0,255 | 1 | 876  | 0 |
| NC_030677.2 | 7473810 | 7474686 | locus214.1 | 642.41 | + | 7473810 | 7474686 | 0,0,255 | 1 | 876  | 0 |
| NC_030677.2 | 7479293 | 7480172 | locus215.1 | 625.92 | - | 7479293 | 7480172 | 0,0,255 | 1 | 879  | 0 |
| NC_030677.2 | 7495573 | 7496512 | locus216.1 | 602.93 | - | 7495573 | 7496512 | 0,0,255 | 1 | 939  | 0 |
| NC_030677.2 | 7519463 | 7520402 | locus217.1 | 613.43 | - | 7519463 | 7520402 | 0,0,255 | 1 | 939  | 0 |
| NC_030677.2 | 7544993 | 7545929 | locus218.1 | 609.93 | - | 7544993 | 7545929 | 0,0,255 | 1 | 936  | 0 |
| NC_030677.2 | 7568816 | 7569755 | locus219.1 | 607.93 | - | 7568816 | 7569755 | 0,0,255 | 1 | 939  | 0 |
| NC_030677.2 | 7588599 | 7589538 | locus221.1 | 606.94 | - | 7588599 | 7589538 | 0,0,255 | 1 | 939  | 0 |
| NC_030677.2 | 7607166 | 7608105 | locus222.1 | 608.43 | - | 7607166 | 7608105 | 0,0,255 | 1 | 939  | 0 |
| NC_030677.2 | 7627433 | 7628327 | locus224.1 | 610.93 | - | 7627433 | 7628327 | 0,0,255 | 1 | 894  | 0 |
| NC_030677.2 | 7647375 | 7648272 | locus225.1 | 642.91 | - | 7647375 | 7648272 | 0,0,255 | 1 | 897  | 0 |
| NC_030677.2 | 7667698 | 7668511 | locus226.1 | 641.45 | - | 7667698 | 7668511 | 0,0,255 | 1 | 813  | 0 |
| NC_030677.2 | 7705636 | 7706512 | locus227.1 | 630.92 | + | 7705636 | 7706512 | 0,0,255 | 1 | 876  | 0 |
| NC_030677.2 | 7738892 | 7739768 | locus228.1 | 605.93 | - | 7738892 | 7739768 | 0,0,255 | 1 | 876  | 0 |
| NC_030677.2 | 7770787 | 7771657 | locus229.1 | 629.92 | - | 7770787 | 7771657 | 0,0,255 | 1 | 870  | 0 |
| NC_030677.2 | 7791627 | 7792506 | locus230.1 | 623.43 | - | 7791627 | 7792506 | 0,0,255 | 1 | 879  | 0 |
| NC_030677.2 | 7823648 | 7824527 | locus231.1 | 622.93 | - | 7823648 | 7824527 | 0,0,255 | 1 | 879  | 0 |
| NC_030677.2 | 7856914 | 7857793 | locus232.1 | 625.93 | - | 7856914 | 7857793 | 0,0,255 | 1 | 879  | 0 |
| NC_030677.2 | 7881908 | 7882787 | locus233.1 | 624.94 | - | 7881908 | 7882787 | 0,0,255 | 1 | 879  | 0 |
| NC_030677.2 | 7922676 | 7923555 | locus234.1 | 626.93 | - | 7922676 | 7923555 | 0,0,255 | 1 | 879  | 0 |
| NC_030677.2 | 8011457 | 8012351 | locus236.1 | 621.93 | + | 8011457 | 8012351 | 0,0,255 | 1 | 894  | 0 |
| NC_030677.2 | 8081627 | 8082506 | locus237.1 | 623.93 | + | 8081627 | 8082506 | 0,0,255 | 1 | 879  | 0 |
| NC_030677.2 | 8096116 | 8097049 | locus238.1 | 635.42 | - | 8096116 | 8097049 | 0,0,255 | 1 | 933  | 0 |
| NC_030677.2 | 8172828 | 8173722 | locus239.1 | 615.93 | + | 8172828 | 8173722 | 0,0,255 | 1 | 894  | 0 |

|             |          |          |            |        |   |          |          |         |   |       |           |
|-------------|----------|----------|------------|--------|---|----------|----------|---------|---|-------|-----------|
| NC_030677.2 | 8246276  | 8247110  | locus240.1 | 622.42 | + | 8246276  | 8247110  | 0,0,255 | 1 | 834   | 0         |
| NC_030677.2 | 8269738  | 8270632  | locus241.1 | 618.93 | + | 8269738  | 8270632  | 0,0,255 | 1 | 894   | 0         |
| NC_030677.2 | 8277431  | 8278162  | locus242.1 | 220.99 | - | 8277431  | 8278162  | 0,0,255 | 3 | ##### | 0,275,440 |
| NC_030677.2 | 8289029  | 8289938  | locus243.1 | 615.43 | + | 8289029  | 8289938  | 0,0,255 | 1 | 909   | 0         |
| NC_030677.2 | 8291931  | 8292828  | locus244.1 | 621.42 | - | 8291931  | 8292828  | 0,0,255 | 1 | 897   | 0         |
| NC_030677.2 | 8335313  | 8336207  | locus245.1 | 627.42 | + | 8335313  | 8336207  | 0,0,255 | 1 | 894   | 0         |
| NC_030677.2 | 8367032  | 8368007  | locus246.1 | 618.42 | + | 8367032  | 8368007  | 0,0,255 | 1 | 975   | 0         |
| NC_030677.2 | 8400144  | 8401116  | locus247.1 | 612.93 | + | 8400144  | 8401116  | 0,0,255 | 1 | 972   | 0         |
| NC_030677.2 | 8422551  | 8423448  | locus248.1 | 633.43 | + | 8422551  | 8423448  | 0,0,255 | 1 | 897   | 0         |
| NC_030677.2 | 8426584  | 8427370  | locus249.1 | 619.93 | - | 8426584  | 8427370  | 0,0,255 | 1 | 786   | 0         |
| NC_030677.2 | 8445527  | 8446421  | locus250.1 | 626.43 | - | 8445527  | 8446421  | 0,0,255 | 1 | 894   | 0         |
| NC_030677.2 | 8466696  | 8467590  | locus251.1 | 617.92 | - | 8466696  | 8467590  | 0,0,255 | 1 | 894   | 0         |
| NC_030677.2 | 8505718  | 8506612  | locus252.1 | 618.43 | - | 8505718  | 8506612  | 0,0,255 | 1 | 894   | 0         |
| NC_030677.2 | 8547622  | 8548597  | locus254.1 | 610.93 | - | 8547622  | 8548597  | 0,0,255 | 1 | 975   | 0         |
| NC_030677.2 | 8574731  | 8575676  | locus255.1 | 622.43 | - | 8574731  | 8575676  | 0,0,255 | 1 | 945   | 0         |
| NC_030677.2 | 8595310  | 8596204  | locus256.1 | 619.93 | - | 8595310  | 8596204  | 0,0,255 | 1 | 894   | 0         |
| NC_030677.2 | 8614680  | 8615556  | locus257.1 | 634.43 | - | 8614680  | 8615556  | 0,0,255 | 1 | 876   | 0         |
| NC_030677.2 | 8677649  | 8678615  | locus258.1 | 635.92 | + | 8677649  | 8678615  | 0,0,255 | 1 | 966   | 0         |
| NC_030677.2 | 8683850  | 8684726  | locus259.1 | 641.42 | - | 8683850  | 8684726  | 0,0,255 | 1 | 876   | 0         |
| NC_030677.2 | 8697403  | 8698279  | locus260.1 | 636.92 | - | 8697403  | 8698279  | 0,0,255 | 1 | 876   | 0         |
| NC_030677.2 | 8740732  | 8741608  | locus261.1 | 632.42 | - | 8740732  | 8741608  | 0,0,255 | 1 | 876   | 0         |
| NC_030677.2 | 8776365  | 8777241  | locus262.1 | 630.42 | - | 8776365  | 8777241  | 0,0,255 | 1 | 876   | 0         |
| NC_030677.2 | 8809061  | 8810027  | locus263.1 | 638.43 | - | 8809061  | 8810027  | 0,0,255 | 1 | 966   | 0         |
| NC_030677.2 | 8882872  | 8883802  | locus265.1 | 498.47 | - | 8882872  | 8883802  | 0,0,255 | 1 | 930   | 0         |
| NC_030677.2 | 8923168  | 8924107  | locus266.1 | 498.47 | - | 8923168  | 8924107  | 0,0,255 | 1 | 939   | 0         |
| NC_030677.2 | 8974456  | 8975395  | locus268.1 | 499.46 | - | 8974456  | 8975395  | 0,0,255 | 1 | 939   | 0         |
| NC_030677.2 | 9039083  | 9039965  | locus269.1 | 614.66 | + | 9039083  | 9039965  | 0,0,255 | 1 | 882   | 0         |
| NC_030677.2 | 9087616  | 9088555  | locus270.1 | 620.15 | + | 9087616  | 9088555  | 0,0,255 | 1 | 939   | 0         |
| NC_030677.2 | 9143139  | 9144111  | locus271.1 | 608.25 | + | 9143139  | 9144111  | 0,0,255 | 1 | 972   | 0         |
| NC_030677.2 | 9174874  | 9175759  | locus272.1 | 617.16 | + | 9174874  | 9175759  | 0,0,255 | 1 | 885   | 0         |
| NC_030677.2 | 9200577  | 9201450  | locus274.1 | 605.76 | - | 9200577  | 9201450  | 0,0,255 | 1 | 873   | 0         |
| NC_030677.2 | 9239717  | 9240599  | locus275.1 | 622.15 | - | 9239717  | 9240599  | 0,0,255 | 1 | 882   | 0         |
| NC_030677.2 | 9285903  | 9286785  | locus277.1 | 613.65 | - | 9285903  | 9286785  | 0,0,255 | 1 | 882   | 0         |
| NC_030677.2 | 9327549  | 9328428  | locus278.1 | 618.14 | - | 9327549  | 9328428  | 0,0,255 | 1 | 879   | 0         |
| NC_030677.2 | 9348790  | 9349693  | locus279.1 | 483.98 | - | 9348790  | 9349693  | 0,0,255 | 1 | 903   | 0         |
| NC_030677.2 | 9387125  | 9388019  | locus280.1 | 630.42 | + | 9387125  | 9388019  | 0,0,255 | 1 | 894   | 0         |
| NC_030677.2 | 9410297  | 9411170  | locus282.1 | 620.93 | + | 9410297  | 9411170  | 0,0,255 | 1 | 873   | 0         |
| NC_030677.2 | 17430992 | 17431916 | locus283.1 | 477    | + | 17430992 | 17431916 | 0,0,255 | 1 | 924   | 0         |
| NC_030677.2 | 17478457 | 17479354 | locus285.1 | 585.46 | + | 17478457 | 17479354 | 0,0,255 | 1 | 897   | 0         |
| NC_030677.2 | 17496128 | 17497025 | locus286.1 | 579.46 | + | 17496128 | 17497025 | 0,0,255 | 1 | 897   | 0         |
| NC_030677.2 | 17524962 | 17525859 | locus287.1 | 571.46 | + | 17524962 | 17525859 | 0,0,255 | 1 | 897   | 0         |
| NC_030677.2 | 17546542 | 17547421 | locus288.1 | 573.97 | + | 17546542 | 17547421 | 0,0,255 | 1 | 879   | 0         |
| NC_030677.2 | 17573752 | 17574649 | locus290.1 | 587.46 | + | 17573752 | 17574649 | 0,0,255 | 1 | 897   | 0         |
| NC_030677.2 | 17598296 | 17599193 | locus291.1 | 578.96 | + | 17598296 | 17599193 | 0,0,255 | 1 | 897   | 0         |

|             |           |          |            |        |   |           |           |         |   |       |        |
|-------------|-----------|----------|------------|--------|---|-----------|-----------|---------|---|-------|--------|
| NC_030677.2 | 17616658  | 17617555 | locus292.1 | 578.46 | + | 17616658  | 17617555  | 0,0,255 | 1 | 897   | 0      |
| NC_030677.2 | 17641760  | 17642639 | locus294.1 | 561.98 | + | 17641760  | 17642639  | 0,0,255 | 1 | 879   | 0      |
| NC_030677.2 | 17669122  | 17670001 | locus295.1 | 566.47 | + | 17669122  | 17670001  | 0,0,255 | 1 | 879   | 0      |
| NC_030677.2 | 17689807  | 17690704 | locus296.1 | 573.97 | + | 17689807  | 17690704  | 0,0,255 | 1 | 897   | 0      |
| NC_030678.2 | 21334     | 27928    | locus332.1 | 629.59 | + | 21334     | 27928     | 0,0,255 | 2 | 9,879 | 0,5715 |
| NC_030678.2 | 178164867 | 1.78E+08 | locus374.1 | 689.69 | - | 178164867 | 178165770 | 0,0,255 | 1 | 903   | 0      |
| NC_030678.2 | 178209944 | 1.78E+08 | locus375.1 | 689.69 | - | 178209944 | 178210847 | 0,0,255 | 1 | 903   | 0      |
| NC_030678.2 | 178237350 | 1.78E+08 | locus376.1 | 690.19 | - | 178237350 | 178238253 | 0,0,255 | 1 | 903   | 0      |
| NC_030678.2 | 178311473 | 1.78E+08 | locus377.1 | 683.2  | - | 178311473 | 178312376 | 0,0,255 | 1 | 903   | 0      |
| NC_030678.2 | 178396223 | 1.78E+08 | locus378.1 | 689.7  | + | 178396223 | 178397132 | 0,0,255 | 1 | 909   | 0      |
| NC_030678.2 | 178416973 | 1.78E+08 | locus379.1 | 685.24 | - | 178416973 | 178417876 | 0,0,255 | 1 | 903   | 0      |
| NC_030678.2 | 178470580 | 1.78E+08 | locus380.1 | 692.74 | - | 178470580 | 178471483 | 0,0,255 | 1 | 903   | 0      |
| NC_030678.2 | 178501805 | 1.79E+08 | locus381.1 | 684.74 | - | 178501805 | 178502708 | 0,0,255 | 1 | 903   | 0      |
| NC_030678.2 | 178540754 | 1.79E+08 | locus382.1 | 693.73 | - | 178540754 | 178541657 | 0,0,255 | 1 | 903   | 0      |
| NC_030678.2 | 178573630 | 1.79E+08 | locus383.1 | 692.23 | - | 178573630 | 178574533 | 0,0,255 | 1 | 903   | 0      |
| NC_030678.2 | 178654064 | 1.79E+08 | locus385.1 | 704.23 | + | 178654064 | 178654967 | 0,0,255 | 1 | 903   | 0      |
| NC_030678.2 | 178665401 | 1.79E+08 | locus386.1 | 695.73 | - | 178665401 | 178666304 | 0,0,255 | 1 | 903   | 0      |
| NC_030678.2 | 178709921 | 1.79E+08 | locus388.1 | 694.73 | - | 178709921 | 178710818 | 0,0,255 | 1 | 897   | 0      |
| NC_030678.2 | 178733260 | 1.79E+08 | locus389.1 | 685.74 | - | 178733260 | 178734157 | 0,0,255 | 1 | 897   | 0      |
| NC_030679.2 | 145271855 | 1.45E+08 | locus416.1 | 442.21 | + | 145271855 | 145272815 | 0,0,255 | 1 | 960   | 0      |
| NC_030679.2 | 145283085 | 1.45E+08 | locus417.1 | 436.71 | + | 145283085 | 145284045 | 0,0,255 | 1 | 960   | 0      |
| NC_030679.2 | 145622605 | 1.46E+08 | locus418.1 | 717.92 | + | 145622605 | 145623526 | 0,0,255 | 1 | 921   | 0      |
| NC_030679.2 | 145630946 | 1.46E+08 | locus419.1 | 717.92 | + | 145630946 | 145631867 | 0,0,255 | 1 | 921   | 0      |
| NC_030679.2 | 145647365 | 1.46E+08 | locus420.1 | 622.89 | + | 145647365 | 145648214 | 0,0,255 | 1 | 849   | 0      |
| NC_030679.2 | 145712850 | 1.46E+08 | locus421.1 | 708.35 | + | 145712850 | 145713801 | 0,0,255 | 1 | 951   | 0      |
| NC_030679.2 | 145728373 | 1.46E+08 | locus422.1 | 558.76 | + | 145728373 | 145729291 | 0,0,255 | 1 | 918   | 0      |
| NC_030679.2 | 145741602 | 1.46E+08 | locus423.1 | 593.17 | + | 145741602 | 145742487 | 0,0,255 | 1 | 885   | 0      |
| NC_030679.2 | 145755902 | 1.46E+08 | locus424.1 | 718.6  | + | 145755902 | 145756820 | 0,0,255 | 1 | 918   | 0      |
| NC_030679.2 | 145770103 | 1.46E+08 | locus425.1 | 705.18 | + | 145770103 | 145771000 | 0,0,255 | 1 | 897   | 0      |
| NC_030679.2 | 145809884 | 1.46E+08 | locus426.1 | 519.79 | + | 145809884 | 145810895 | 0,0,255 | 1 | 1011  | 0      |
| NC_030679.2 | 145823381 | 1.46E+08 | locus427.1 | 508.43 | + | 145823381 | 145824350 | 0,0,255 | 1 | 969   | 0      |
| NC_030679.2 | 145840075 | 1.46E+08 | locus428.1 | 650.23 | + | 145840075 | 145840975 | 0,0,255 | 1 | 900   | 0      |
| NC_030679.2 | 145857765 | 1.46E+08 | locus429.1 | 681.21 | + | 145857765 | 145858644 | 0,0,255 | 1 | 879   | 0      |
| NC_030679.2 | 145888657 | 1.46E+08 | locus431.1 | 696.71 | + | 145888657 | 145889536 | 0,0,255 | 1 | 879   | 0      |
| NC_030679.2 | 145898777 | 1.46E+08 | locus432.1 | 686.71 | + | 145898777 | 145899656 | 0,0,255 | 1 | 879   | 0      |
| NC_030679.2 | 145909288 | 1.46E+08 | locus433.1 | 681.73 | + | 145909288 | 145910284 | 0,0,255 | 1 | 996   | 0      |
| NC_030679.2 | 145930741 | 1.46E+08 | locus434.1 | 664.22 | + | 145930741 | 145931611 | 0,0,255 | 1 | 870   | 0      |
| NC_030679.2 | 145942731 | 1.46E+08 | locus435.1 | 720.69 | + | 145942731 | 145943595 | 0,0,255 | 1 | 864   | 0      |
| NC_030679.2 | 145958197 | 1.46E+08 | locus436.1 | 684.22 | + | 145958197 | 145959070 | 0,0,255 | 1 | 873   | 0      |
| NC_030679.2 | 145975594 | 1.46E+08 | locus437.1 | 675.22 | + | 145975594 | 145976467 | 0,0,255 | 1 | 873   | 0      |
| NC_030679.2 | 145994586 | 1.46E+08 | locus438.1 | 675.73 | + | 145994586 | 145995459 | 0,0,255 | 1 | 873   | 0      |
| NC_030679.2 | 146006472 | 1.46E+08 | locus439.1 | 675.73 | + | 146006472 | 146007351 | 0,0,255 | 1 | 879   | 0      |
| NC_030679.2 | 146020705 | 1.46E+08 | locus441.1 | 676.72 | + | 146020705 | 146021584 | 0,0,255 | 1 | 879   | 0      |
| NC_030679.2 | 146032668 | 1.46E+08 | locus442.1 | 657.23 | + | 146032668 | 146033547 | 0,0,255 | 1 | 879   | 0      |

|             |           |          |            |        |   |           |           |         |   |     |   |
|-------------|-----------|----------|------------|--------|---|-----------|-----------|---------|---|-----|---|
| NC_030679.2 | 146046333 | 1.46E+08 | locus443.1 | 645.73 | + | 146046333 | 146047218 | 0,0,255 | 1 | 885 | 0 |
| NC_030679.2 | 146059583 | 1.46E+08 | locus444.1 | 650.72 | + | 146059583 | 146060462 | 0,0,255 | 1 | 879 | 0 |
| NC_030679.2 | 146075269 | 1.46E+08 | locus445.1 | 592.62 | + | 146075269 | 146076166 | 0,0,255 | 1 | 897 | 0 |
| NC_030679.2 | 146087607 | 1.46E+08 | locus446.1 | 608.36 | + | 146087607 | 146088495 | 0,0,255 | 1 | 888 | 0 |
| NC_030679.2 | 146096117 | 1.46E+08 | locus447.1 | 625.61 | + | 146096117 | 146097017 | 0,0,255 | 1 | 900 | 0 |
| NC_030679.2 | 146109752 | 1.46E+08 | locus448.1 | 606.1  | + | 146109752 | 146110679 | 0,0,255 | 1 | 927 | 0 |
| NC_030679.2 | 146119495 | 1.46E+08 | locus449.1 | 610.62 | + | 146119495 | 146120413 | 0,0,255 | 1 | 918 | 0 |
| NC_030679.2 | 146130416 | 1.46E+08 | locus451.1 | 595.88 | + | 146130416 | 146131316 | 0,0,255 | 1 | 900 | 0 |
| NC_030679.2 | 146141168 | 1.46E+08 | locus452.1 | 657.35 | + | 146141168 | 146142068 | 0,0,255 | 1 | 900 | 0 |
| NC_030679.2 | 146153466 | 1.46E+08 | locus453.1 | 623.6  | + | 146153466 | 146154420 | 0,0,255 | 1 | 954 | 0 |
| NC_030679.2 | 146166997 | 1.46E+08 | locus454.1 | 625.37 | + | 146166997 | 146167777 | 0,0,255 | 1 | 780 | 0 |
| NC_030679.2 | 146180285 | 1.46E+08 | locus455.1 | 621.11 | + | 146180285 | 146181182 | 0,0,255 | 1 | 897 | 0 |
| NC_030679.2 | 146190904 | 1.46E+08 | locus456.1 | 606.87 | + | 146190904 | 146191804 | 0,0,255 | 1 | 900 | 0 |
| NC_030679.2 | 146205635 | 1.46E+08 | locus457.1 | 587.39 | + | 146205635 | 146206415 | 0,0,255 | 1 | 780 | 0 |
| NC_030679.2 | 146210829 | 1.46E+08 | locus458.1 | 620.11 | - | 146210829 | 146211807 | 0,0,255 | 1 | 978 | 0 |
| NC_030679.2 | 146231789 | 1.46E+08 | locus459.1 | 598.12 | + | 146231789 | 146232698 | 0,0,255 | 1 | 909 | 0 |
| NC_030679.2 | 146241341 | 1.46E+08 | locus460.1 | 602.61 | + | 146241341 | 146242241 | 0,0,255 | 1 | 900 | 0 |
| NC_030679.2 | 146390737 | 1.46E+08 | locus463.1 | 606.37 | - | 146390737 | 146391640 | 0,0,255 | 1 | 903 | 0 |
| NC_030679.2 | 146415510 | 1.46E+08 | locus464.1 | 616.85 | - | 146415510 | 146416416 | 0,0,255 | 1 | 906 | 0 |
| NC_030679.2 | 146427112 | 1.46E+08 | locus465.1 | 661.84 | - | 146427112 | 146428009 | 0,0,255 | 1 | 897 | 0 |
| NC_030679.2 | 146436266 | 1.46E+08 | locus466.1 | 729.31 | - | 146436266 | 146437106 | 0,0,255 | 1 | 840 | 0 |
| NC_030679.2 | 146445846 | 1.46E+08 | locus467.1 | 616.36 | - | 146445846 | 146446746 | 0,0,255 | 1 | 900 | 0 |
| NC_030679.2 | 146457394 | 1.46E+08 | locus468.1 | 611.12 | - | 146457394 | 146458294 | 0,0,255 | 1 | 900 | 0 |
| NC_030679.2 | 146483646 | 1.46E+08 | locus469.1 | 610.38 | + | 146483646 | 146484546 | 0,0,255 | 1 | 900 | 0 |
| NC_030679.2 | 146495074 | 1.46E+08 | locus470.1 | 628.6  | + | 146495074 | 146495974 | 0,0,255 | 1 | 900 | 0 |
| NC_030679.2 | 146508942 | 1.47E+08 | locus471.1 | 621.61 | + | 146508942 | 146509842 | 0,0,255 | 1 | 900 | 0 |
| NC_030679.2 | 146521524 | 1.47E+08 | locus472.1 | 623.61 | + | 146521524 | 146522445 | 0,0,255 | 1 | 921 | 0 |
| NC_030679.2 | 146541550 | 1.47E+08 | locus473.1 | 617.86 | + | 146541550 | 146542390 | 0,0,255 | 1 | 840 | 0 |
| NC_030679.2 | 146555963 | 1.47E+08 | locus474.1 | 619.12 | + | 146555963 | 146556863 | 0,0,255 | 1 | 900 | 0 |
| NC_030679.2 | 146568197 | 1.47E+08 | locus475.1 | 625.85 | + | 146568197 | 146569085 | 0,0,255 | 1 | 888 | 0 |
| NC_030679.2 | 146573705 | 1.47E+08 | locus476.1 | 620.35 | - | 146573705 | 146574575 | 0,0,255 | 1 | 870 | 0 |
| NC_030679.2 | 146585402 | 1.47E+08 | locus477.1 | 629.61 | - | 146585402 | 146586296 | 0,0,255 | 1 | 894 | 0 |
| NC_030679.2 | 146598469 | 1.47E+08 | locus478.1 | 628.86 | - | 146598469 | 146599357 | 0,0,255 | 1 | 888 | 0 |
| NC_030679.2 | 146617463 | 1.47E+08 | locus479.1 | 612.36 | + | 146617463 | 146618336 | 0,0,255 | 1 | 873 | 0 |
| NC_030679.2 | 146626905 | 1.47E+08 | locus480.1 | 591.26 | + | 146626905 | 146627682 | 0,0,255 | 1 | 777 | 0 |
| NC_030679.2 | 146637775 | 1.47E+08 | locus481.1 | 618.62 | + | 146637775 | 146638669 | 0,0,255 | 1 | 894 | 0 |
| NC_030679.2 | 146650644 | 1.47E+08 | locus482.1 | 621.85 | + | 146650644 | 146651409 | 0,0,255 | 1 | 765 | 0 |
| NC_030679.2 | 146656544 | 1.47E+08 | locus483.1 | 622.12 | + | 146656544 | 146657435 | 0,0,255 | 1 | 891 | 0 |
| NC_030679.2 | 146668798 | 1.47E+08 | locus484.1 | 627.11 | + | 146668798 | 146669704 | 0,0,255 | 1 | 906 | 0 |
| NC_030679.2 | 146677964 | 1.47E+08 | locus485.1 | 609.12 | + | 146677964 | 146678864 | 0,0,255 | 1 | 900 | 0 |
| NC_030679.2 | 146686602 | 1.47E+08 | locus486.1 | 610.61 | + | 146686602 | 146687502 | 0,0,255 | 1 | 900 | 0 |
| NC_030679.2 | 146698121 | 1.47E+08 | locus487.1 | 621.61 | + | 146698121 | 146699021 | 0,0,255 | 1 | 900 | 0 |
| NC_030679.2 | 146709546 | 1.47E+08 | locus488.1 | 610.11 | + | 146709546 | 146710440 | 0,0,255 | 1 | 894 | 0 |
| NC_030679.2 | 146722272 | 1.47E+08 | locus489.1 | 622.86 | + | 146722272 | 146723196 | 0,0,255 | 1 | 924 | 0 |

|             |           |          |            |        |   |           |           |         |   |           |             |
|-------------|-----------|----------|------------|--------|---|-----------|-----------|---------|---|-----------|-------------|
| NC_030679.2 | 146727993 | 1.47E+08 | locus490.1 | 702    | - | 146727993 | 146728956 | 0,0,255 | 1 | 963       | 0           |
| NC_030679.2 | 146746937 | 1.47E+08 | locus491.1 | 610.62 | + | 146746937 | 146747837 | 0,0,255 | 1 | 900       | 0           |
| NC_030679.2 | 146752351 | 1.47E+08 | locus492.1 | 724.56 | - | 146752351 | 146753251 | 0,0,255 | 1 | 900       | 0           |
| NC_030679.2 | 146761250 | 1.47E+08 | locus493.1 | 612.62 | - | 146761250 | 146762237 | 0,0,255 | 1 | 987       | 0           |
| NC_030679.2 | 146772261 | 1.47E+08 | locus494.1 | 628.85 | - | 146772261 | 146773161 | 0,0,255 | 1 | 900       | 0           |
| NC_030679.2 | 146791494 | 1.47E+08 | locus496.1 | 621.61 | - | 146791494 | 146792394 | 0,0,255 | 1 | 900       | 0           |
| NC_030679.2 | 146812154 | 1.47E+08 | locus497.1 | 715.04 | + | 146812154 | 146812946 | 0,0,255 | 1 | 792       | 0           |
| NC_030679.2 | 146824901 | 1.47E+08 | locus498.1 | 721.91 | + | 146824901 | 146825834 | 0,0,255 | 1 | 933       | 0           |
| NC_030679.2 | 146847230 | 1.47E+08 | locus499.1 | 398.13 | + | 146847230 | 146848133 | 0,0,255 | 1 | 903       | 0           |
| NC_030680.2 | 24522     | 25397    | locus502.1 | 632.86 | + | 24522     | 25397     | 0,0,255 | 2 | 30,834    | 0,41        |
| NC_030680.2 | 24688609  | 24689527 | locus505.1 | 409.89 | + | 24688609  | 24689527  | 0,0,255 | 1 | 918       | 0           |
| NC_030680.2 | 24711758  | 24712661 | locus506.1 | 394.9  | + | 24711758  | 24712661  | 0,0,255 | 1 | 903       | 0           |
| NC_030680.2 | 24741300  | 24742218 | locus507.1 | 399.9  | + | 24741300  | 24742218  | 0,0,255 | 1 | 918       | 0           |
| NC_030680.2 | 24791734  | 24792631 | locus508.1 | 396.4  | + | 24791734  | 24792631  | 0,0,255 | 1 | 897       | 0           |
| NC_030680.2 | 128529424 | 1.29E+08 | locus531.1 | 697.86 | - | 128529424 | 128530360 | 0,0,255 | 1 | 936       | 0           |
| NC_030680.2 | 152998213 | 1.53E+08 | locus536.1 | 633.33 | + | 152998213 | 153006860 | 0,0,255 | 3 | 26,14,896 | 0,6824,7751 |
| NC_030681.2 | 116456528 | 1.16E+08 | locus568.1 | 697.58 | - | 116456528 | 116457512 | 0,0,255 | 1 | 984       | 0           |
| NC_030681.2 | 116482565 | 1.16E+08 | locus569.1 | 695.8  | - | 116482565 | 116483405 | 0,0,255 | 1 | 840       | 0           |
| NC_030681.2 | 154715071 | 1.55E+08 | locus578.1 | 413.96 | - | 154715071 | 154715854 | 0,0,255 | 1 | 783       | 0           |
| NC_030681.2 | 154750009 | 1.55E+08 | locus580.1 | 415.47 | - | 154750009 | 154750792 | 0,0,255 | 1 | 783       | 0           |
| NC_030681.2 | 154764974 | 1.55E+08 | locus581.1 | 419.46 | - | 154764974 | 154765931 | 0,0,255 | 1 | 957       | 0           |
| NC_030681.2 | 154780095 | 1.55E+08 | locus582.1 | 418.96 | - | 154780095 | 154781025 | 0,0,255 | 1 | 930       | 0           |
| NC_030681.2 | 154800559 | 1.55E+08 | locus583.1 | 419.47 | - | 154800559 | 154801342 | 0,0,255 | 1 | 783       | 0           |
| NC_030681.2 | 154841651 | 1.55E+08 | locus584.1 | 412.48 | - | 154841651 | 154842563 | 0,0,255 | 1 | 912       | 0           |
| NC_030681.2 | 154860552 | 1.55E+08 | locus585.1 | 411.48 | - | 154860552 | 154861518 | 0,0,255 | 1 | 966       | 0           |
| NC_030681.2 | 154877224 | 1.55E+08 | locus586.1 | 410.49 | - | 154877224 | 154878022 | 0,0,255 | 1 | 798       | 0           |
| NC_030681.2 | 154899877 | 1.55E+08 | locus587.1 | 421.97 | - | 154899877 | 154900789 | 0,0,255 | 1 | 912       | 0           |
| NC_030681.2 | 154924047 | 1.55E+08 | locus588.1 | 424.46 | - | 154924047 | 154924851 | 0,0,255 | 1 | 804       | 0           |
| NC_030681.2 | 154955745 | 1.55E+08 | locus589.1 | 414.38 | - | 154955745 | 154956606 | 0,0,255 | 1 | 861       | 0           |
| NC_030681.2 | 154980120 | 1.55E+08 | locus590.1 | 382.77 | - | 154980120 | 154980893 | 0,0,255 | 2 | 742,14    | 0,759       |
| NC_030681.2 | 155007217 | 1.55E+08 | locus591.1 | 423.46 | - | 155007217 | 155008129 | 0,0,255 | 1 | 912       | 0           |
| NC_030681.2 | 155038792 | 1.55E+08 | locus592.1 | 420.4  | - | 155038792 | 155039734 | 0,0,255 | 1 | 942       | 0           |
| NC_030681.2 | 155055448 | 1.55E+08 | locus593.1 | 423.46 | - | 155055448 | 155056252 | 0,0,255 | 1 | 804       | 0           |
| NC_030681.2 | 155078235 | 1.55E+08 | locus594.1 | 414.35 | - | 155078235 | 155079186 | 0,0,255 | 1 | 951       | 0           |
| NC_030681.2 | 155188260 | 1.55E+08 | locus596.1 | 414.47 | - | 155188260 | 155189190 | 0,0,255 | 1 | 930       | 0           |
| NC_030681.2 | 155220413 | 1.55E+08 | locus597.1 | 429.96 | - | 155220413 | 155221343 | 0,0,255 | 1 | 930       | 0           |
| NC_030681.2 | 155249835 | 1.55E+08 | locus598.1 | 421.97 | - | 155249835 | 155250750 | 0,0,255 | 1 | 915       | 0           |
| NC_030681.2 | 155268003 | 1.55E+08 | locus599.1 | 423.47 | - | 155268003 | 155268810 | 0,0,255 | 1 | 807       | 0           |
| NC_030681.2 | 155288745 | 1.55E+08 | locus600.1 | 416.97 | - | 155288745 | 155289675 | 0,0,255 | 1 | 930       | 0           |
| NC_030681.2 | 155309287 | 1.55E+08 | locus601.1 | 432.45 | - | 155309287 | 155310217 | 0,0,255 | 1 | 930       | 0           |
| NC_030681.2 | 155324442 | 1.55E+08 | locus602.1 | 423.97 | - | 155324442 | 155325249 | 0,0,255 | 1 | 807       | 0           |
| NC_030681.2 | 155340816 | 1.55E+08 | locus603.1 | 411.47 | - | 155340816 | 155341746 | 0,0,255 | 1 | 930       | 0           |
| NC_030681.2 | 155361948 | 1.55E+08 | locus604.1 | 414.47 | - | 155361948 | 155362878 | 0,0,255 | 1 | 930       | 0           |
| NC_030681.2 | 155383950 | 1.55E+08 | locus605.1 | 409.47 | - | 155383950 | 155384880 | 0,0,255 | 1 | 930       | 0           |



|             |           |          |            |        |   |           |           |         |   |         |       |
|-------------|-----------|----------|------------|--------|---|-----------|-----------|---------|---|---------|-------|
| NC_030681.2 | 155399948 | 1.55E+08 | locus606.1 | 409.88 | - | 155399948 | 155400878 | 0,0,255 | 1 | 930     | 0     |
| NC_030681.2 | 155417584 | 1.55E+08 | locus607.1 | 423.96 | - | 155417584 | 155418514 | 0,0,255 | 1 | 930     | 0     |
| NC_030681.2 | 155441606 | 1.55E+08 | locus608.1 | 420.47 | - | 155441606 | 155442536 | 0,0,255 | 1 | 930     | 0     |
| NC_030681.2 | 155462515 | 1.55E+08 | locus609.1 | 420.46 | - | 155462515 | 155463445 | 0,0,255 | 1 | 930     | 0     |
| NC_030681.2 | 155517971 | 1.56E+08 | locus611.1 | 403.48 | + | 155517971 | 155518874 | 0,0,255 | 1 | 903     | 0     |
| NC_030681.2 | 155536170 | 1.56E+08 | locus612.1 | 416.97 | + | 155536170 | 155537091 | 0,0,255 | 1 | 921     | 0     |
| NC_030681.2 | 155548209 | 1.56E+08 | locus613.1 | 402.88 | + | 155548209 | 155549094 | 0,0,255 | 1 | 885     | 0     |
| NC_030681.2 | 155554970 | 1.56E+08 | locus614.1 | 419.48 | - | 155554970 | 155555885 | 0,0,255 | 1 | 915     | 0     |
| NC_030681.2 | 155571529 | 1.56E+08 | locus615.1 | 406.98 | - | 155571529 | 155572393 | 0,0,255 | 1 | 864     | 0     |
| NC_030681.2 | 155588287 | 1.56E+08 | locus616.1 | 412.97 | - | 155588287 | 155589148 | 0,0,255 | 1 | 861     | 0     |
| NC_030681.2 | 155623117 | 1.56E+08 | locus618.1 | 414.46 | - | 155623117 | 155623978 | 0,0,255 | 1 | 861     | 0     |
| NC_030681.2 | 155673182 | 1.56E+08 | locus619.1 | 413.97 | + | 155673182 | 155674079 | 0,0,255 | 1 | 897     | 0     |
| NC_030681.2 | 155683846 | 1.56E+08 | locus620.1 | 422.37 | - | 155683846 | 155684713 | 0,0,255 | 1 | 867     | 0     |
| NC_030681.2 | 155706852 | 1.56E+08 | locus621.1 | 425.97 | - | 155706852 | 155707782 | 0,0,255 | 1 | 930     | 0     |
| NC_030681.2 | 155733012 | 1.56E+08 | locus622.1 | 419.98 | - | 155733012 | 155733927 | 0,0,255 | 1 | 915     | 0     |
| NC_030681.2 | 155750174 | 1.56E+08 | locus623.1 | 431.46 | - | 155750174 | 155751038 | 0,0,255 | 1 | 864     | 0     |
| NC_030681.2 | 155772749 | 1.56E+08 | locus624.1 | 418.47 | - | 155772749 | 155773607 | 0,0,255 | 1 | 858     | 0     |
| NC_030681.2 | 155795189 | 1.56E+08 | locus625.1 | 398.49 | - | 155795189 | 155796053 | 0,0,255 | 1 | 864     | 0     |
| NC_030681.2 | 155806344 | 1.56E+08 | locus626.1 | 423.47 | - | 155806344 | 155807256 | 0,0,255 | 1 | 912     | 0     |
| NC_030681.2 | 155863270 | 1.56E+08 | locus627.1 | 419.98 | - | 155863270 | 155864182 | 0,0,255 | 1 | 912     | 0     |
| NC_030681.2 | 155893139 | 1.56E+08 | locus628.1 | 428.97 | - | 155893139 | 155894000 | 0,0,255 | 1 | 861     | 0     |
| NC_030681.2 | 155916395 | 1.56E+08 | locus629.1 | 429.98 | - | 155916395 | 155917301 | 0,0,255 | 1 | 906     | 0     |
| NC_030681.2 | 155934595 | 1.56E+08 | locus630.1 | 405    | - | 155934595 | 155935510 | 0,0,255 | 1 | 915     | 0     |
| NC_030681.2 | 155961910 | 1.56E+08 | locus631.1 | 422.48 | + | 155961910 | 155962816 | 0,0,255 | 1 | 906     | 0     |
| NC_030681.2 | 155982143 | 1.56E+08 | locus632.1 | 424.98 | + | 155982143 | 155983055 | 0,0,255 | 1 | 912     | 0     |
| NC_030681.2 | 156021443 | 1.56E+08 | locus634.1 | 376.01 | + | 156021443 | 156022363 | 0,0,255 | 2 | 555,354 | 0,566 |
| NC_030681.2 | 156049531 | 1.56E+08 | locus635.1 | 416.48 | + | 156049531 | 156050419 | 0,0,255 | 1 | 888     | 0     |
| NC_030681.2 | 156069827 | 1.56E+08 | locus636.1 | 405.38 | + | 156069827 | 156070715 | 0,0,255 | 1 | 888     | 0     |
| NC_030681.2 | 156084413 | 1.56E+08 | locus637.1 | 424.35 | + | 156084413 | 156085334 | 0,0,255 | 1 | 921     | 0     |
| NC_030681.2 | 156100820 | 1.56E+08 | locus638.1 | 418.36 | + | 156100820 | 156101708 | 0,0,255 | 1 | 888     | 0     |
| NC_030681.2 | 156139821 | 1.56E+08 | locus639.1 | 409.98 | + | 156139821 | 156140715 | 0,0,255 | 1 | 894     | 0     |
| NC_030681.2 | 156148158 | 1.56E+08 | locus640.1 | 407.98 | - | 156148158 | 156149040 | 0,0,255 | 1 | 882     | 0     |
| NC_030681.2 | 156207645 | 1.56E+08 | locus641.1 | 412.48 | + | 156207645 | 156208530 | 0,0,255 | 1 | 885     | 0     |
| NC_030681.2 | 156221196 | 1.56E+08 | locus642.1 | 419.65 | + | 156221196 | 156222090 | 0,0,255 | 1 | 894     | 0     |
| NC_030681.2 | 156238562 | 1.56E+08 | locus643.1 | 396.74 | + | 156238562 | 156239411 | 0,0,255 | 1 | 849     | 0     |
| NC_030681.2 | 156261594 | 1.56E+08 | locus644.1 | 410.38 | + | 156261594 | 156262482 | 0,0,255 | 1 | 888     | 0     |
| NC_030681.2 | 156282376 | 1.56E+08 | locus645.1 | 402.98 | + | 156282376 | 156283264 | 0,0,255 | 1 | 888     | 0     |
| NC_030681.2 | 156291784 | 1.56E+08 | locus646.1 | 419.97 | + | 156291784 | 156292669 | 0,0,255 | 1 | 885     | 0     |
| NC_030681.2 | 156311492 | 1.56E+08 | locus647.1 | 413.47 | + | 156311492 | 156312377 | 0,0,255 | 1 | 885     | 0     |
| NC_030681.2 | 156343383 | 1.56E+08 | locus648.1 | 413.84 | + | 156343383 | 156344268 | 0,0,255 | 1 | 885     | 0     |
| NC_030681.2 | 156374263 | 1.56E+08 | locus649.1 | 412.48 | + | 156374263 | 156375148 | 0,0,255 | 1 | 885     | 0     |
| NC_030681.2 | 156390154 | 1.56E+08 | locus650.1 | 416.96 | + | 156390154 | 156391039 | 0,0,255 | 1 | 885     | 0     |
| NC_030681.2 | 156449612 | 1.56E+08 | locus651.1 | 409.98 | + | 156449612 | 156450494 | 0,0,255 | 1 | 882     | 0     |
| NC_030681.2 | 156493612 | 1.56E+08 | locus653.1 | 410.48 | + | 156493612 | 156494497 | 0,0,255 | 1 | 885     | 0     |

|             |           |          |            |          |           |           |         |   |         |       |
|-------------|-----------|----------|------------|----------|-----------|-----------|---------|---|---------|-------|
| NC_030681.2 | 156531038 | 1.57E+08 | locus654.1 | 415.97 + | 156531038 | 156532187 | 0,0,255 | 1 | 1149    | 0     |
| NC_030681.2 | 156565268 | 1.57E+08 | locus655.1 | 412.35 + | 156565268 | 156566150 | 0,0,255 | 1 | 882     | 0     |
| NC_030681.2 | 156583720 | 1.57E+08 | locus656.1 | 403.97 - | 156583720 | 156584605 | 0,0,255 | 1 | 885     | 0     |
| NC_030681.2 | 156612842 | 1.57E+08 | locus657.1 | 405.47 - | 156612842 | 156613727 | 0,0,255 | 1 | 885     | 0     |
| NC_030681.2 | 156668846 | 1.57E+08 | locus658.1 | 410.97 - | 156668846 | 156669848 | 0,0,255 | 1 | 1002    | 0     |
| NC_030681.2 | 156684798 | 1.57E+08 | locus659.1 | 404.07 - | 156684798 | 156685683 | 0,0,255 | 1 | 885     | 0     |
| NC_030681.2 | 156715443 | 1.57E+08 | locus660.1 | 403.48 - | 156715443 | 156716262 | 0,0,255 | 1 | 819     | 0     |
| NC_030681.2 | 156729671 | 1.57E+08 | locus661.1 | 406.48 - | 156729671 | 156730553 | 0,0,255 | 1 | 882     | 0     |
| NC_030681.2 | 156744834 | 1.57E+08 | locus662.1 | 420.97 - | 156744834 | 156745722 | 0,0,255 | 1 | 888     | 0     |
| NC_030681.2 | 156820331 | 1.57E+08 | locus663.1 | 406.98 + | 156820331 | 156821216 | 0,0,255 | 1 | 885     | 0     |
| NC_030681.2 | 156840266 | 1.57E+08 | locus664.1 | 406.47 - | 156840266 | 156841151 | 0,0,255 | 1 | 885     | 0     |
| NC_030681.2 | 156898140 | 1.57E+08 | locus665.1 | 399.48 - | 156898140 | 156899025 | 0,0,255 | 1 | 885     | 0     |
| NC_030681.2 | 156926649 | 1.57E+08 | locus666.1 | 399.98 - | 156926649 | 156927534 | 0,0,255 | 1 | 885     | 0     |
| NC_030681.2 | 156941228 | 1.57E+08 | locus667.1 | 413.98 - | 156941228 | 156942113 | 0,0,255 | 1 | 885     | 0     |
| NC_030681.2 | 156972041 | 1.57E+08 | locus668.1 | 410.48 - | 156972041 | 156972926 | 0,0,255 | 1 | 885     | 0     |
| NC_030681.2 | 157014199 | 1.57E+08 | locus669.1 | 402.16 - | 157014199 | 157015084 | 0,0,255 | 1 | 885     | 0     |
| NC_030681.2 | 157046627 | 1.57E+08 | locus670.1 | 418.46 - | 157046627 | 157047521 | 0,0,255 | 1 | 894     | 0     |
| NC_030681.2 | 157095759 | 1.57E+08 | locus671.1 | 403.98 - | 157095759 | 157096641 | 0,0,255 | 1 | 882     | 0     |
| NC_030681.2 | 157140496 | 1.57E+08 | locus672.1 | 412.97 - | 157140496 | 157141378 | 0,0,255 | 1 | 882     | 0     |
| NC_030681.2 | 157188927 | 1.57E+08 | locus673.1 | 408.84 - | 157188927 | 157189812 | 0,0,255 | 1 | 885     | 0     |
| NC_030681.2 | 157214151 | 1.57E+08 | locus674.1 | 412.48 - | 157214151 | 157215111 | 0,0,255 | 1 | 960     | 0     |
| NC_030681.2 | 157234518 | 1.57E+08 | locus675.1 | 407.98 - | 157234518 | 157235403 | 0,0,255 | 1 | 885     | 0     |
| NC_030681.2 | 157256298 | 1.57E+08 | locus676.1 | 413.64 - | 157256298 | 157257183 | 0,0,255 | 1 | 885     | 0     |
| NC_030681.2 | 157272283 | 1.57E+08 | locus677.1 | 406.48 - | 157272283 | 157273165 | 0,0,255 | 1 | 882     | 0     |
| NC_030681.2 | 157305469 | 1.57E+08 | locus678.1 | 413.47 - | 157305469 | 157306354 | 0,0,255 | 1 | 885     | 0     |
| NC_030681.2 | 157333314 | 1.57E+08 | locus679.1 | 421.47 - | 157333314 | 157334196 | 0,0,255 | 1 | 882     | 0     |
| NC_030681.2 | 157369443 | 1.57E+08 | locus680.1 | 413.47 - | 157369443 | 157370328 | 0,0,255 | 1 | 885     | 0     |
| NC_030681.2 | 157397213 | 1.57E+08 | locus681.1 | 371.42 - | 157397213 | 157398088 | 0,0,255 | 2 | 674,190 | 0,685 |
| NC_030681.2 | 157467229 | 1.57E+08 | locus682.1 | 403.49 - | 157467229 | 157468117 | 0,0,255 | 1 | 888     | 0     |
| NC_030681.2 | 157492880 | 1.57E+08 | locus683.1 | 411.36 - | 157492880 | 157493744 | 0,0,255 | 1 | 864     | 0     |
| NC_030681.2 | 157507457 | 1.58E+08 | locus684.1 | 417.48 - | 157507457 | 157508351 | 0,0,255 | 1 | 894     | 0     |
| NC_030681.2 | 157526766 | 1.58E+08 | locus685.1 | 413.47 - | 157526766 | 157527657 | 0,0,255 | 1 | 891     | 0     |
| NC_030681.2 | 157564389 | 1.58E+08 | locus686.1 | 410.48 + | 157564389 | 157565271 | 0,0,255 | 1 | 882     | 0     |
| NC_030681.2 | 157601956 | 1.58E+08 | locus687.1 | 418.97 + | 157601956 | 157602841 | 0,0,255 | 1 | 885     | 0     |
| NC_030681.2 | 157611434 | 1.58E+08 | locus688.1 | 408.98 - | 157611434 | 157612322 | 0,0,255 | 1 | 888     | 0     |
| NC_030681.2 | 157650119 | 1.58E+08 | locus689.1 | 415.86 - | 157650119 | 157651007 | 0,0,255 | 1 | 888     | 0     |
| NC_030681.2 | 157664628 | 1.58E+08 | locus690.1 | 423.35 - | 157664628 | 157665549 | 0,0,255 | 1 | 921     | 0     |
| NC_030681.2 | 157678611 | 1.58E+08 | locus691.1 | 406.17 - | 157678611 | 157679604 | 0,0,255 | 1 | 993     | 0     |
| NC_030681.2 | 157699836 | 1.58E+08 | locus692.1 | 416.98 - | 157699836 | 157700724 | 0,0,255 | 1 | 888     | 0     |
| NC_030681.2 | 157785646 | 1.58E+08 | locus695.1 | 422.48 - | 157785646 | 157786558 | 0,0,255 | 1 | 912     | 0     |
| NC_030681.2 | 157805793 | 1.58E+08 | locus696.1 | 422.98 - | 157805793 | 157806699 | 0,0,255 | 1 | 906     | 0     |
| NC_030681.2 | 157833133 | 1.58E+08 | locus697.1 | 406 +    | 157833133 | 157833997 | 0,0,255 | 1 | 864     | 0     |
| NC_030681.2 | 157905071 | 1.58E+08 | locus698.1 | 419.98 + | 157905071 | 157905983 | 0,0,255 | 1 | 912     | 0     |
| NC_030681.2 | 157970739 | 1.58E+08 | locus699.1 | 407.49 + | 157970739 | 157971603 | 0,0,255 | 1 | 864     | 0     |

|             |           |          |            |          |           |           |         |   |       |        |
|-------------|-----------|----------|------------|----------|-----------|-----------|---------|---|-------|--------|
| NC_030681.2 | 157993126 | 1.58E+08 | locus700.1 | 421.47 + | 157993126 | 157993984 | 0,0,255 | 1 | 858   | 0      |
| NC_030681.2 | 158015775 | 1.58E+08 | locus701.1 | 431.46 + | 158015775 | 158016639 | 0,0,255 | 1 | 864   | 0      |
| NC_030681.2 | 158032917 | 1.58E+08 | locus702.1 | 419.98 + | 158032917 | 158033832 | 0,0,255 | 1 | 915   | 0      |
| NC_030681.2 | 158054736 | 1.58E+08 | locus703.1 | 427.97 + | 158054736 | 158055666 | 0,0,255 | 1 | 930   | 0      |
| NC_030681.2 | 158077522 | 1.58E+08 | locus704.1 | 421.38 + | 158077522 | 158078389 | 0,0,255 | 1 | 867   | 0      |
| NC_030681.2 | 158087565 | 1.58E+08 | locus705.1 | 413.97 - | 158087565 | 158088462 | 0,0,255 | 1 | 897   | 0      |
| NC_030681.2 | 158138791 | 1.58E+08 | locus706.1 | 415.47 + | 158138791 | 158139652 | 0,0,255 | 1 | 861   | 0      |
| NC_030681.2 | 158174060 | 1.58E+08 | locus708.1 | 414.47 + | 158174060 | 158174921 | 0,0,255 | 1 | 861   | 0      |
| NC_030681.2 | 158194035 | 1.58E+08 | locus709.1 | 406.48 + | 158194035 | 158194899 | 0,0,255 | 1 | 864   | 0      |
| NC_030681.2 | 158208129 | 1.58E+08 | locus710.1 | 421.97 + | 158208129 | 158209044 | 0,0,255 | 1 | 915   | 0      |
| NC_030681.2 | 158220481 | 1.58E+08 | locus711.1 | 401.88 - | 158220481 | 158221366 | 0,0,255 | 1 | 885   | 0      |
| NC_030681.2 | 158232497 | 1.58E+08 | locus712.1 | 414.97 - | 158232497 | 158233418 | 0,0,255 | 1 | 921   | 0      |
| NC_030681.2 | 158251920 | 1.58E+08 | locus713.1 | 401.85 - | 158251920 | 158252805 | 0,0,255 | 1 | 885   | 0      |
| NC_030681.2 | 158263521 | 1.58E+08 | locus714.1 | 415.96 - | 158263521 | 158264439 | 0,0,255 | 1 | 918   | 0      |
| NC_030681.2 | 158301563 | 1.58E+08 | locus715.1 | 425.47 + | 158301563 | 158302493 | 0,0,255 | 1 | 930   | 0      |
| NC_030681.2 | 158322953 | 1.58E+08 | locus716.1 | 417.97 + | 158322953 | 158323883 | 0,0,255 | 1 | 930   | 0      |
| NC_030681.2 | 158346689 | 1.58E+08 | locus717.1 | 423.96 + | 158346689 | 158347619 | 0,0,255 | 1 | 930   | 0      |
| NC_030681.2 | 158364958 | 1.58E+08 | locus718.1 | 410.48 + | 158364958 | 158365888 | 0,0,255 | 1 | 930   | 0      |
| NC_030681.2 | 158402803 | 1.58E+08 | locus720.1 | 415.98 + | 158402803 | 158403733 | 0,0,255 | 1 | 930   | 0      |
| NC_030681.2 | 158421225 | 1.58E+08 | locus721.1 | 416.47 + | 158421225 | 158422155 | 0,0,255 | 1 | 930   | 0      |
| NC_030681.2 | 158437203 | 1.58E+08 | locus722.1 | 422.48 + | 158437203 | 158438133 | 0,0,255 | 1 | 930   | 0      |
| NC_030681.2 | 158452420 | 1.58E+08 | locus723.1 | 430.45 + | 158452420 | 158453350 | 0,0,255 | 1 | 930   | 0      |
| NC_030681.2 | 158487897 | 1.58E+08 | locus725.1 | 424.96 + | 158487897 | 158488704 | 0,0,255 | 1 | 807   | 0      |
| NC_030681.2 | 158507316 | 1.59E+08 | locus726.1 | 423.97 + | 158507316 | 158508231 | 0,0,255 | 1 | 915   | 0      |
| NC_030681.2 | 158534968 | 1.59E+08 | locus727.1 | 429.96 + | 158534968 | 158535898 | 0,0,255 | 1 | 930   | 0      |
| NC_030681.2 | 158607532 | 1.59E+08 | locus728.1 | 425.47 + | 158607532 | 158608462 | 0,0,255 | 1 | 930   | 0      |
| NC_030681.2 | 158640124 | 1.59E+08 | locus729.1 | 424.47 + | 158640124 | 158640952 | 0,0,255 | 1 | 828   | 0      |
| NC_030681.2 | 158695737 | 1.59E+08 | locus730.1 | 349.89 + | 158695737 | 158696547 | 0,0,255 | 1 | 810   | 0      |
| NC_030681.2 | 158757522 | 1.59E+08 | locus731.1 | 405.98 + | 158757522 | 158758488 | 0,0,255 | 1 | 966   | 0      |
| NC_030681.2 | 158773404 | 1.59E+08 | locus732.1 | 416.98 + | 158773404 | 158774259 | 0,0,255 | 1 | 855   | 0      |
| NC_030681.2 | 158823975 | 1.59E+08 | locus734.1 | 418.96 + | 158823975 | 158824905 | 0,0,255 | 1 | 930   | 0      |
| NC_030681.2 | 158838710 | 1.59E+08 | locus735.1 | 422.96 + | 158838710 | 158839667 | 0,0,255 | 1 | 957   | 0      |
| NC_030681.2 | 158852936 | 1.59E+08 | locus736.1 | 422.46 + | 158852936 | 158853719 | 0,0,255 | 1 | 783   | 0      |
| NC_030681.2 | 158859137 | 1.59E+08 | locus737.1 | 415.46 - | 158859137 | 158860085 | 0,0,255 | 1 | 948   | 0      |
| NC_030681.2 | 158885939 | 1.59E+08 | locus738.1 | 419.96 - | 158885939 | 158886824 | 0,0,255 | 1 | 885   | 0      |
| NC_030681.2 | 158939322 | 1.59E+08 | locus739.1 | 416.46 + | 158939322 | 158940219 | 0,0,255 | 1 | 897   | 0      |
| NC_030681.2 | 158972669 | 1.59E+08 | locus741.1 | 413.96 + | 158972669 | 158973716 | 0,0,255 | 1 | 1047  | 0      |
| NC_030681.2 | 159234119 | 1.59E+08 | locus742.1 | 410.47 - | 159234119 | 159235007 | 0,0,255 | 1 | 888   | 0      |
| NC_030681.2 | 159253212 | 1.59E+08 | locus743.1 | 412.66 - | 159253212 | 159254094 | 0,0,255 | 1 | 882   | 0      |
| NC_030681.2 | 159274453 | 1.59E+08 | locus744.1 | 411.47 - | 159274453 | 159275335 | 0,0,255 | 1 | 882   | 0      |
| NC_030681.2 | 159290872 | 1.59E+08 | locus745.1 | 411.9 -  | 159290872 | 159291884 | 0,0,255 | 2 | 875,7 | 0,1005 |
| NC_030681.2 | 159357840 | 1.59E+08 | locus746.1 | 419.47 + | 159357840 | 159358722 | 0,0,255 | 1 | 882   | 0      |
| NC_030681.2 | 159372800 | 1.59E+08 | locus747.1 | 413.47 + | 159372800 | 159373682 | 0,0,255 | 1 | 882   | 0      |
| NC_030681.2 | 159391780 | 1.59E+08 | locus748.1 | 411.98 + | 159391780 | 159392662 | 0,0,255 | 1 | 882   | 0      |

|             |           |          |            |        |   |           |           |         |   |          |             |
|-------------|-----------|----------|------------|--------|---|-----------|-----------|---------|---|----------|-------------|
| NC_030681.2 | 159410028 | 1.59E+08 | locus749.1 | 411.66 | + | 159410028 | 159410910 | 0,0,255 | 1 | 882      | 0           |
| NC_030681.2 | 159423069 | 1.59E+08 | locus750.1 | 403.98 | + | 159423069 | 159423888 | 0,0,255 | 1 | 819      | 0           |
| NC_030681.2 | 159441586 | 1.59E+08 | locus751.1 | 401.42 | + | 159441586 | 159442465 | 0,0,255 | 1 | 879      | 0           |
| NC_030681.2 | 159458246 | 1.59E+08 | locus752.1 | 410.97 | + | 159458246 | 159459128 | 0,0,255 | 1 | 882      | 0           |
| NC_030681.2 | 159476719 | 1.59E+08 | locus753.1 | 409.47 | + | 159476719 | 159477607 | 0,0,255 | 1 | 888      | 0           |
| NC_030681.2 | 160299084 | 1.6E+08  | locus754.1 | 398.48 | + | 160299084 | 160299957 | 0,0,255 | 1 | 873      | 0           |
| NC_030681.2 | 160339058 | 1.6E+08  | locus755.1 | 400.97 | + | 160339058 | 160339976 | 0,0,255 | 1 | 918      | 0           |
| NC_030681.2 | 160350807 | 1.6E+08  | locus756.1 | 415.98 | - | 160350807 | 160351680 | 0,0,255 | 1 | 873      | 0           |
| NC_030681.2 | 160389885 | 1.6E+08  | locus757.1 | 394.48 | + | 160389885 | 160390758 | 0,0,255 | 1 | 873      | 0           |
| NC_030681.2 | 160421331 | 1.6E+08  | locus758.1 | 409.47 | + | 160421331 | 160422204 | 0,0,255 | 1 | 873      | 0           |
| NC_030681.2 | 160430947 | 1.6E+08  | locus759.1 | 398.48 | + | 160430947 | 160431820 | 0,0,255 | 1 | 873      | 0           |
| NC_030681.2 | 160447076 | 1.6E+08  | locus760.1 | 402.47 | + | 160447076 | 160447949 | 0,0,255 | 1 | 873      | 0           |
| NC_030681.2 | 160463911 | 1.6E+08  | locus761.1 | 402.47 | + | 160463911 | 160464784 | 0,0,255 | 1 | 873      | 0           |
| NC_030681.2 | 160479263 | 1.6E+08  | locus762.1 | 402.47 | + | 160479263 | 160480136 | 0,0,255 | 1 | 873      | 0           |
| NC_030681.2 | 160497053 | 1.6E+08  | locus763.1 | 407.48 | + | 160497053 | 160497974 | 0,0,255 | 1 | 921      | 0           |
| NC_030681.2 | 160533515 | 1.61E+08 | locus764.1 | 403.97 | + | 160533515 | 160534457 | 0,0,255 | 1 | 942      | 0           |
| NC_030681.2 | 160556685 | 1.61E+08 | locus765.1 | 401.97 | + | 160556685 | 160557558 | 0,0,255 | 1 | 873      | 0           |
| NC_030681.2 | 160566538 | 1.61E+08 | locus766.1 | 402.47 | - | 160566538 | 160567411 | 0,0,255 | 1 | 873      | 0           |
| NC_030681.2 | 160595058 | 1.61E+08 | locus767.1 | 401.47 | - | 160595058 | 160596000 | 0,0,255 | 1 | 942      | 0           |
| NC_030681.2 | 160633412 | 1.61E+08 | locus768.1 | 404.97 | - | 160633412 | 160634285 | 0,0,255 | 1 | 873      | 0           |
| NC_030681.2 | 160654222 | 1.61E+08 | locus769.1 | 399.48 | - | 160654222 | 160655095 | 0,0,255 | 1 | 873      | 0           |
| NC_030681.2 | 160685334 | 1.61E+08 | locus770.1 | 401.46 | - | 160685334 | 160686207 | 0,0,255 | 1 | 873      | 0           |
| NC_030681.2 | 160714142 | 1.61E+08 | locus771.1 | 400.98 | - | 160714142 | 160715084 | 0,0,255 | 1 | 942      | 0           |
| NC_030681.2 | 160754668 | 1.61E+08 | locus772.1 | 403.97 | - | 160754668 | 160755610 | 0,0,255 | 1 | 942      | 0           |
| NC_030681.2 | 160785237 | 1.61E+08 | locus773.1 | 400.97 | - | 160785237 | 160786110 | 0,0,255 | 1 | 873      | 0           |
| NC_030681.2 | 160800059 | 1.61E+08 | locus774.1 | 400.98 | - | 160800059 | 160800932 | 0,0,255 | 1 | 873      | 0           |
| NC_030681.2 | 160881173 | 1.61E+08 | locus776.1 | 400.97 | + | 160881173 | 160882115 | 0,0,255 | 1 | 942      | 0           |
| NC_030681.2 | 160934621 | 1.61E+08 | locus778.1 | 399.48 | + | 160934621 | 160935494 | 0,0,255 | 1 | 873      | 0           |
| NC_030681.2 | 160970410 | 1.61E+08 | locus779.1 | 393.98 | + | 160970410 | 160971283 | 0,0,255 | 1 | 873      | 0           |
| NC_030681.2 | 160997296 | 1.61E+08 | locus780.1 | 398.47 | + | 160997296 | 160998169 | 0,0,255 | 1 | 873      | 0           |
| NC_030681.2 | 161951424 | 1.62E+08 | locus781.1 | 467.36 | - | 161951424 | 161952333 | 0,0,255 | 1 | 909      | 0           |
| NC_030681.2 | 162768620 | 1.63E+08 | locus782.1 | 710.9  | - | 162768620 | 162769517 | 0,0,255 | 1 | 897      | 0           |
| NC_030681.2 | 162797056 | 1.63E+08 | locus783.1 | 705.9  | - | 162797056 | 162797902 | 0,0,255 | 1 | 846      | 0           |
| NC_030681.2 | 162852634 | 1.63E+08 | locus785.1 | 709.4  | + | 162852634 | 162853480 | 0,0,255 | 1 | 846      | 0           |
| NC_030681.2 | 163387067 | 1.63E+08 | locus786.1 | 406.41 | - | 163387067 | 163387985 | 0,0,255 | 1 | 918      | 0           |
| NC_030681.2 | 163806574 | 1.64E+08 | locus787.1 | 613.69 | - | 163806574 | 163820415 | 0,0,255 | 3 | 91,827,9 | 0,232,13832 |
| NC_030682.2 | 133471    | 134397   | locus788.1 | 612.39 | + | 133471    | 134397    | 0,0,255 | 2 | 30,885   | 0,41        |
| NC_030683.2 | 102962369 | 1.03E+08 | locus847.1 | 574.59 | + | 102962369 | 102963374 | 0,0,255 | 2 | 692,259  | 0,746       |
| NC_030683.2 | 103145211 | 1.03E+08 | locus848.1 | 571.99 | - | 103145211 | 103146132 | 0,0,255 | 1 | 921      | 0           |
| NC_030683.2 | 103161507 | 1.03E+08 | locus849.1 | 569.92 | - | 103161507 | 103162431 | 0,0,255 | 2 | 250,620  | 0,304       |
| NC_030683.2 | 103178607 | 1.03E+08 | locus850.1 | 694.41 | - | 103178607 | 103179531 | 0,0,255 | 1 | 924      | 0           |
| NC_030683.2 | 103205220 | 1.03E+08 | locus852.1 | 559.11 | - | 103205220 | 103206099 | 0,0,255 | 2 | 241,584  | 0,295       |
| NC_030683.2 | 103234456 | 1.03E+08 | locus853.1 | 580.91 | - | 103234456 | 103235323 | 0,0,255 | 2 | 247,566  | 0,301       |
| NC_030683.2 | 103239411 | 1.03E+08 | locus854.1 | 561.61 | - | 103239411 | 103240359 | 0,0,255 | 2 | 247,647  | 0,301       |

|             |           |          |            |        |   |           |           |         |   |         |       |
|-------------|-----------|----------|------------|--------|---|-----------|-----------|---------|---|---------|-------|
| NC_030683.2 | 103252046 | 1.03E+08 | locus855.1 | 569.92 | - | 103252046 | 103252931 | 0,0,255 | 2 | 247,584 | 0,301 |
| NC_030683.2 | 103264154 | 1.03E+08 | locus856.1 | 572.09 | - | 103264154 | 103265039 | 0,0,255 | 2 | 247,584 | 0,301 |
| NC_030683.2 | 103274702 | 1.03E+08 | locus857.1 | 649.88 | - | 103274702 | 103275575 | 0,0,255 | 2 | 253,566 | 0,307 |
| NC_030683.2 | 103292091 | 1.03E+08 | locus858.1 | 587.9  | - | 103292091 | 103293078 | 0,0,255 | 2 | 274,659 | 0,328 |
| NC_030683.2 | 103314139 | 1.03E+08 | locus860.1 | 585.17 | - | 103314139 | 103315072 | 0,0,255 | 2 | 247,632 | 0,301 |
| NC_030683.2 | 103330636 | 1.03E+08 | locus862.1 | 584.96 | - | 103330636 | 103331533 | 0,0,255 | 2 | 259,584 | 0,313 |
| NC_030683.2 | 103342877 | 1.03E+08 | locus863.1 | 575.09 | - | 103342877 | 103343813 | 0,0,255 | 2 | 259,623 | 0,313 |
| NC_030683.2 | 103357233 | 1.03E+08 | locus864.1 | 445.53 | - | 103357233 | 103358124 | 0,0,255 | 2 | 271,566 | 0,325 |
| NC_030683.2 | 103369450 | 1.03E+08 | locus865.1 | 444.2  | - | 103369450 | 103370341 | 0,0,255 | 2 | 271,566 | 0,325 |
| NC_030683.2 | 103380080 | 1.03E+08 | locus866.1 | 436.71 | - | 103380080 | 103380971 | 0,0,255 | 2 | 271,566 | 0,325 |
| NC_030683.2 | 103388898 | 1.03E+08 | locus867.1 | 445.21 | - | 103388898 | 103389789 | 0,0,255 | 2 | 271,566 | 0,325 |
| NC_030684.2 | 1271851   | 1272634  | locus875.1 | 668.98 | - | 1271851   | 1272634   | 0,0,255 | 1 | 783     | 0     |
| NC_030684.2 | 64857632  | 64858601 | locus890.1 | 398.45 | + | 64857632  | 64858601  | 0,0,255 | 1 | 969     | 0     |
| NC_030684.2 | 120151819 | 1.2E+08  | locus903.1 | 437.88 | - | 120151819 | 120152740 | 0,0,255 | 1 | 921     | 0     |
| NC_030684.2 | 120266315 | 1.2E+08  | locus905.1 | 401.37 | + | 120266315 | 120267224 | 0,0,255 | 1 | 909     | 0     |
| NC_030684.2 | 120272888 | 1.2E+08  | locus906.1 | 395.88 | - | 120272888 | 120273809 | 0,0,255 | 1 | 921     | 0     |
| NC_030684.2 | 120367889 | 1.2E+08  | locus908.1 | 674.92 | + | 120367889 | 120368780 | 0,0,255 | 1 | 891     | 0     |
| NC_030684.2 | 120508348 | 1.21E+08 | locus909.1 | 438.89 | + | 120508348 | 120509248 | 0,0,255 | 1 | 900     | 0     |
| NC_030684.2 | 120562151 | 1.21E+08 | locus910.1 | 436.38 | + | 120562151 | 120563081 | 0,0,255 | 1 | 930     | 0     |
| NC_030684.2 | 120584772 | 1.21E+08 | locus911.1 | 439.38 | + | 120584772 | 120585672 | 0,0,255 | 1 | 900     | 0     |
| NC_030684.2 | 120609590 | 1.21E+08 | locus912.1 | 429.39 | + | 120609590 | 120610520 | 0,0,255 | 1 | 930     | 0     |
| NC_030684.2 | 120633374 | 1.21E+08 | locus913.1 | 420.14 | + | 120633374 | 120634268 | 0,0,255 | 1 | 894     | 0     |
| NC_030684.2 | 120655966 | 1.21E+08 | locus914.1 | 437.37 | + | 120655966 | 120656923 | 0,0,255 | 1 | 957     | 0     |
| NC_030684.2 | 120758816 | 1.21E+08 | locus915.1 | 420.89 | + | 120758816 | 120759713 | 0,0,255 | 1 | 897     | 0     |
| NC_030684.2 | 120799205 | 1.21E+08 | locus916.1 | 420.9  | + | 120799205 | 120800102 | 0,0,255 | 1 | 897     | 0     |
| NC_030684.2 | 120840845 | 1.21E+08 | locus917.1 | 407.9  | + | 120840845 | 120841742 | 0,0,255 | 1 | 897     | 0     |
| NC_030684.2 | 120878982 | 1.21E+08 | locus918.1 | 411.9  | + | 120878982 | 120879879 | 0,0,255 | 1 | 897     | 0     |
| NC_030684.2 | 120921959 | 1.21E+08 | locus919.1 | 409.9  | + | 120921959 | 120922856 | 0,0,255 | 1 | 897     | 0     |
| NC_030684.2 | 120941613 | 1.21E+08 | locus920.1 | 412.4  | + | 120941613 | 120942510 | 0,0,255 | 1 | 897     | 0     |
| NC_030684.2 | 121006034 | 1.21E+08 | locus922.1 | 431.9  | + | 121006034 | 121006931 | 0,0,255 | 1 | 897     | 0     |
| NC_030684.2 | 121030642 | 1.21E+08 | locus923.1 | 421.4  | + | 121030642 | 121031539 | 0,0,255 | 1 | 897     | 0     |
| NC_030684.2 | 121062894 | 1.21E+08 | locus924.1 | 422.89 | + | 121062894 | 121063797 | 0,0,255 | 1 | 903     | 0     |
| NC_030684.2 | 122053742 | 1.22E+08 | locus926.1 | 440.38 | + | 122053742 | 122054630 | 0,0,255 | 1 | 888     | 0     |
| NC_030684.2 | 122093658 | 1.22E+08 | locus927.1 | 447.37 | + | 122093658 | 122094546 | 0,0,255 | 1 | 888     | 0     |
| NC_030684.2 | 122132340 | 1.22E+08 | locus928.1 | 448.36 | + | 122132340 | 122133228 | 0,0,255 | 1 | 888     | 0     |
| NC_030684.2 | 122167756 | 1.22E+08 | locus929.1 | 450.36 | + | 122167756 | 122168644 | 0,0,255 | 1 | 888     | 0     |
| NC_030684.2 | 122185836 | 1.22E+08 | locus930.1 | 450.86 | + | 122185836 | 122186724 | 0,0,255 | 1 | 888     | 0     |
| NC_030684.2 | 122205002 | 1.22E+08 | locus931.1 | 447.37 | + | 122205002 | 122205890 | 0,0,255 | 1 | 888     | 0     |
| NC_030684.2 | 122222015 | 1.22E+08 | locus932.1 | 440.86 | + | 122222015 | 122222903 | 0,0,255 | 1 | 888     | 0     |
| NC_030684.2 | 122268448 | 1.22E+08 | locus933.1 | 446.86 | + | 122268448 | 122269330 | 0,0,255 | 1 | 882     | 0     |
| NC_030684.2 | 122343970 | 1.22E+08 | locus934.1 | 459.85 | + | 122343970 | 122344870 | 0,0,255 | 1 | 900     | 0     |
| NC_030684.2 | 122360722 | 1.22E+08 | locus935.1 | 453.35 | + | 122360722 | 122361613 | 0,0,255 | 1 | 891     | 0     |
| NC_030684.2 | 122383303 | 1.22E+08 | locus936.1 | 449.37 | - | 122383303 | 122384206 | 0,0,255 | 1 | 903     | 0     |
| NC_030684.2 | 122409955 | 1.22E+08 | locus937.1 | 456.86 | - | 122409955 | 122410858 | 0,0,255 | 1 | 903     | 0     |

|             |           |          |            |        |   |           |           |         |   |      |   |
|-------------|-----------|----------|------------|--------|---|-----------|-----------|---------|---|------|---|
| NC_030684.2 | 122431682 | 1.22E+08 | locus938.1 | 453.86 | - | 122431682 | 122432585 | 0,0,255 | 1 | 903  | 0 |
| NC_030684.2 | 122447326 | 1.22E+08 | locus939.1 | 465.36 | - | 122447326 | 122448229 | 0,0,255 | 1 | 903  | 0 |
| NC_030684.2 | 122462640 | 1.22E+08 | locus940.1 | 410.16 | - | 122462640 | 122463537 | 0,0,255 | 1 | 897  | 0 |
| NC_030684.2 | 122472585 | 1.22E+08 | locus941.1 | 396.66 | - | 122472585 | 122473509 | 0,0,255 | 1 | 924  | 0 |
| NC_030684.2 | 123196134 | 1.23E+08 | locus942.1 | 696.76 | - | 123196134 | 123197022 | 0,0,255 | 1 | 888  | 0 |
| NC_030684.2 | 123225062 | 1.23E+08 | locus943.1 | 400.39 | - | 123225062 | 123226001 | 0,0,255 | 1 | 939  | 0 |
| NC_030684.2 | 123242839 | 1.23E+08 | locus944.1 | 395.08 | - | 123242839 | 123243616 | 0,0,255 | 1 | 777  | 0 |
| NC_030684.2 | 123272794 | 1.23E+08 | locus945.1 | 400.07 | - | 123272794 | 123273586 | 0,0,255 | 1 | 792  | 0 |
| NC_030684.2 | 123299228 | 1.23E+08 | locus946.1 | 389.08 | - | 123299228 | 123300146 | 0,0,255 | 1 | 918  | 0 |
| NC_030684.2 | 123335285 | 1.23E+08 | locus947.1 | 398.08 | - | 123335285 | 123336203 | 0,0,255 | 1 | 918  | 0 |
| NC_030684.2 | 123445890 | 1.23E+08 | locus948.1 | 632.34 | - | 123445890 | 123446796 | 0,0,255 | 1 | 906  | 0 |
| NC_030684.2 | 123481506 | 1.23E+08 | locus950.1 | 678.32 | + | 123481506 | 123482607 | 0,0,255 | 1 | 1101 | 0 |
| NC_030684.2 | 123503503 | 1.24E+08 | locus951.1 | 671.32 | + | 123503503 | 123504517 | 0,0,255 | 1 | 1014 | 0 |
| NC_030684.2 | 123534002 | 1.24E+08 | locus952.1 | 676.83 | + | 123534002 | 123534911 | 0,0,255 | 1 | 909  | 0 |
| NC_030684.2 | 123561352 | 1.24E+08 | locus953.1 | 667.32 | + | 123561352 | 123562432 | 0,0,255 | 1 | 1080 | 0 |
| NC_030684.2 | 123568064 | 1.24E+08 | locus955.1 | 639.83 | - | 123568064 | 123568961 | 0,0,255 | 1 | 897  | 0 |
| NC_030684.2 | 123603898 | 1.24E+08 | locus957.1 | 684.81 | + | 123603898 | 123604807 | 0,0,255 | 1 | 909  | 0 |
| NC_030684.2 | 123611296 | 1.24E+08 | locus958.1 | 641.84 | - | 123611296 | 123612202 | 0,0,255 | 1 | 906  | 0 |
| NC_030684.2 | 123625639 | 1.24E+08 | locus959.1 | 670.82 | - | 123625639 | 123626548 | 0,0,255 | 1 | 909  | 0 |
| NC_030684.2 | 123642642 | 1.24E+08 | locus960.1 | 674.32 | - | 123642642 | 123643551 | 0,0,255 | 1 | 909  | 0 |
| NC_030684.2 | 123665314 | 1.24E+08 | locus961.1 | 667.32 | - | 123665314 | 123666226 | 0,0,255 | 1 | 912  | 0 |
| NC_030684.2 | 123693946 | 1.24E+08 | locus962.1 | 671.82 | - | 123693946 | 123694948 | 0,0,255 | 1 | 1002 | 0 |
| NC_030684.2 | 123719758 | 1.24E+08 | locus963.1 | 680.82 | - | 123719758 | 123720757 | 0,0,255 | 1 | 999  | 0 |
| NC_030684.2 | 123742969 | 1.24E+08 | locus964.1 | 666.32 | - | 123742969 | 123744058 | 0,0,255 | 1 | 1089 | 0 |
| NC_030684.2 | 123770066 | 1.24E+08 | locus965.1 | 667.32 | - | 123770066 | 123770978 | 0,0,255 | 1 | 912  | 0 |
| NC_030684.2 | 123789471 | 1.24E+08 | locus966.1 | 674.82 | - | 123789471 | 123790383 | 0,0,255 | 1 | 912  | 0 |
| NC_030684.2 | 123822532 | 1.24E+08 | locus967.1 | 679.82 | - | 123822532 | 123823444 | 0,0,255 | 1 | 912  | 0 |
| NC_030684.2 | 123845006 | 1.24E+08 | locus968.1 | 667.33 | - | 123845006 | 123845918 | 0,0,255 | 1 | 912  | 0 |
| NC_030684.2 | 123873896 | 1.24E+08 | locus969.1 | 672.82 | - | 123873896 | 123874805 | 0,0,255 | 1 | 909  | 0 |
| NC_030684.2 | 123891709 | 1.24E+08 | locus971.1 | 666.33 | - | 123891709 | 123892798 | 0,0,255 | 1 | 1089 | 0 |
| NC_030684.2 | 123913965 | 1.24E+08 | locus972.1 | 659.33 | - | 123913965 | 123914988 | 0,0,255 | 1 | 1023 | 0 |
| NC_030684.2 | 123933769 | 1.24E+08 | locus973.1 | 673.32 | - | 123933769 | 123934678 | 0,0,255 | 1 | 909  | 0 |
| NC_030684.2 | 123956079 | 1.24E+08 | locus974.1 | 672.32 | - | 123956079 | 123956988 | 0,0,255 | 1 | 909  | 0 |
| NC_030684.2 | 123989850 | 1.24E+08 | locus975.1 | 669.82 | - | 123989850 | 123990747 | 0,0,255 | 1 | 897  | 0 |
| NC_030684.2 | 124008005 | 1.24E+08 | locus976.1 | 667.82 | - | 124008005 | 124008911 | 0,0,255 | 1 | 906  | 0 |
| NC_030684.2 | 124050641 | 1.24E+08 | locus977.1 | 655.75 | + | 124050641 | 124051454 | 0,0,255 | 1 | 813  | 0 |
| NC_030684.2 | 124073126 | 1.24E+08 | locus978.1 | 701.21 | + | 124073126 | 124073939 | 0,0,255 | 1 | 813  | 0 |
| NC_030684.2 | 124099565 | 1.24E+08 | locus979.1 | 627.83 | + | 124099565 | 124100507 | 0,0,255 | 1 | 942  | 0 |
| NC_030684.2 | 124120524 | 1.24E+08 | locus980.1 | 402.3  | + | 124120524 | 124121448 | 0,0,255 | 1 | 924  | 0 |
| NC_030684.2 | 124141358 | 1.24E+08 | locus981.1 | 398.81 | + | 124141358 | 124142243 | 0,0,255 | 1 | 885  | 0 |
| NC_030684.2 | 124161509 | 1.24E+08 | locus982.1 | 379.33 | + | 124161509 | 124162430 | 0,0,255 | 1 | 921  | 0 |
| NC_030684.2 | 124186313 | 1.24E+08 | locus983.1 | 379.24 | + | 124186313 | 124187291 | 0,0,255 | 1 | 978  | 0 |
| NC_030684.2 | 124199647 | 1.24E+08 | locus984.1 | 374.32 | + | 124199647 | 124200568 | 0,0,255 | 1 | 921  | 0 |
| NC_030684.2 | 124217234 | 1.24E+08 | locus985.1 | 371.89 | + | 124217234 | 124218158 | 0,0,255 | 1 | 924  | 0 |

|             |           |          |             |        |   |           |           |         |   |        |        |
|-------------|-----------|----------|-------------|--------|---|-----------|-----------|---------|---|--------|--------|
| NC_030684.2 | 124238497 | 1.24E+08 | locus986.1  | 375.89 | + | 124238497 | 124239421 | 0,0,255 | 1 | 924    | 0      |
| NC_030684.2 | 124268262 | 1.24E+08 | locus987.1  | 377.31 | + | 124268262 | 124269186 | 0,0,255 | 1 | 924    | 0      |
| NC_030684.2 | 124300972 | 1.24E+08 | locus988.1  | 387.89 | + | 124300972 | 124301896 | 0,0,255 | 1 | 924    | 0      |
| NC_030684.2 | 124319645 | 1.24E+08 | locus989.1  | 385.21 | + | 124319645 | 124320533 | 0,0,255 | 1 | 888    | 0      |
| NC_030684.2 | 124341900 | 1.24E+08 | locus990.1  | 385.32 | + | 124341900 | 124342821 | 0,0,255 | 1 | 921    | 0      |
| NC_030684.2 | 124365525 | 1.24E+08 | locus991.1  | 391.23 | + | 124365525 | 124366452 | 0,0,255 | 1 | 927    | 0      |
| NC_030684.2 | 124394031 | 1.24E+08 | locus992.1  | 381.81 | + | 124394031 | 124394940 | 0,0,255 | 1 | 909    | 0      |
| NC_030684.2 | 124408758 | 1.24E+08 | locus993.1  | 401.87 | - | 124408758 | 124409667 | 0,0,255 | 1 | 909    | 0      |
| NC_030684.2 | 124439478 | 1.24E+08 | locus994.1  | 431.82 | - | 124439478 | 124440378 | 0,0,255 | 1 | 900    | 0      |
| NC_030684.2 | 124471663 | 1.24E+08 | locus995.1  | 420.81 | - | 124471663 | 124472563 | 0,0,255 | 1 | 900    | 0      |
| NC_030684.2 | 124506771 | 1.25E+08 | locus997.1  | 665.42 | + | 124506771 | 124507602 | 0,0,255 | 1 | 831    | 0      |
| NC_030684.2 | 124514272 | 1.25E+08 | locus998.1  | 420.32 | - | 124514272 | 124515172 | 0,0,255 | 1 | 900    | 0      |
| NC_030684.2 | 124525548 | 1.25E+08 | locus999.1  | 434.06 | - | 124525548 | 124526448 | 0,0,255 | 1 | 900    | 0      |
| NC_030684.2 | 124542568 | 1.25E+08 | locus1000.1 | 704.23 | - | 124542568 | 124543459 | 0,0,255 | 1 | 891    | 0      |
| NC_030684.2 | 124557985 | 1.25E+08 | locus1001.1 | 715.81 | - | 124557985 | 124558879 | 0,0,255 | 1 | 894    | 0      |
| NC_030684.2 | 124632930 | 1.25E+08 | locus1003.1 | 709.06 | - | 124632930 | 124633830 | 0,0,255 | 1 | 900    | 0      |
| NC_030684.2 | 124657304 | 1.25E+08 | locus1004.1 | 688.56 | - | 124657304 | 124658204 | 0,0,255 | 1 | 900    | 0      |
| NC_030684.2 | 124672716 | 1.25E+08 | locus1005.1 | 606.12 | - | 124672716 | 124673637 | 0,0,255 | 1 | 921    | 0      |
| NC_030684.2 | 124676823 | 1.25E+08 | locus1006.1 | 606.12 | - | 124676823 | 124677744 | 0,0,255 | 1 | 921    | 0      |
| NC_030684.2 | 124727027 | 1.25E+08 | locus1007.1 | 701.91 | - | 124727027 | 124727921 | 0,0,255 | 1 | 894    | 0      |
| NC_030684.2 | 124754575 | 1.25E+08 | locus1009.1 | 693.91 | - | 124754575 | 124755469 | 0,0,255 | 1 | 894    | 0      |
| NC_030684.2 | 124770146 | 1.25E+08 | locus1011.1 | 673.85 | - | 124770146 | 124771046 | 0,0,255 | 1 | 900    | 0      |
| NC_030684.2 | 125117771 | 1.25E+08 | locus1014.1 | 702.41 | + | 125117771 | 125118665 | 0,0,255 | 1 | 894    | 0      |
| NC_030684.2 | 127798466 | 1.28E+08 | locus1017.1 | 611.84 | - | 127798466 | 127799336 | 0,0,255 | 1 | 870    | 0      |
| NC_030684.2 | 127817942 | 1.28E+08 | locus1018.1 | 607.35 | - | 127817942 | 127818812 | 0,0,255 | 1 | 870    | 0      |
| NC_030684.2 | 127830771 | 1.28E+08 | locus1019.1 | 610.84 | - | 127830771 | 127831719 | 0,0,255 | 1 | 948    | 0      |
| NC_030684.2 | 127843652 | 1.28E+08 | locus1020.1 | 609.35 | - | 127843652 | 127844588 | 0,0,255 | 1 | 936    | 0      |
| NC_030684.2 | 127856269 | 1.28E+08 | locus1021.1 | 615.84 | - | 127856269 | 127857205 | 0,0,255 | 1 | 936    | 0      |
| NC_030684.2 | 127876097 | 1.28E+08 | locus1022.1 | 602.35 | - | 127876097 | 127877033 | 0,0,255 | 1 | 936    | 0      |
| NC_030684.2 | 127897746 | 1.28E+08 | locus1023.1 | 619.84 | - | 127897746 | 127898682 | 0,0,255 | 1 | 936    | 0      |
| NC_030685.2 | 16235     | 17110    | locus1028.1 | 630.37 | - | 16235     | 17110     | 0,0,255 | 2 | 834,30 | 0,845  |
| NC_030686.2 | 52381478  | 52388307 | locus1062.1 | 636.09 | - | 52381478  | 52388307  | 0,0,255 | 2 | 876,9  | 0,6820 |

**Caecilian**

---

|            |           |           |              |          |           |           |         |   |     |   |
|------------|-----------|-----------|--------------|----------|-----------|-----------|---------|---|-----|---|
| CABPRQ0100 | 27082     | 27886     | locus46850.1 | 682.52 - | 27082     | 27886     | 0,0,255 | 1 | 804 | 0 |
| LR699147.1 | 250585478 | 250586369 | locus10029.1 | 724.98 - | 250585478 | 250586369 | 0,0,255 | 1 | 891 | 0 |
| LR699150.1 | 90409978  | 90410893  | locus22632.1 | 737.78 - | 90409978  | 90410893  | 0,0,255 | 1 | 915 | 0 |
| LR699154.1 | 160605649 | 160606597 | locus34699.1 | 793.96 - | 160605649 | 160606597 | 0,0,255 | 1 | 948 | 0 |
| LR699154.1 | 161065784 | 161066675 | locus34702.1 | 706.47 + | 161065784 | 161066675 | 0,0,255 | 1 | 891 | 0 |
| LR699155.1 | 119403663 | 119404602 | locus36723.1 | 768.65 - | 119403663 | 119404602 | 0,0,255 | 1 | 939 | 0 |
| LR699155.1 | 119464874 | 119465780 | locus36726.1 | 741.42 - | 119464874 | 119465780 | 0,0,255 | 1 | 906 | 0 |
| LR699155.1 | 119507874 | 119508780 | locus36727.1 | 742.47 + | 119507874 | 119508780 | 0,0,255 | 1 | 906 | 0 |
| LR699155.1 | 119547583 | 119548480 | locus36728.1 | 733.6 +  | 119547583 | 119548480 | 0,0,255 | 1 | 897 | 0 |
| LR699155.1 | 119571081 | 119572020 | locus36730.1 | 762.85 + | 119571081 | 119572020 | 0,0,255 | 1 | 939 | 0 |
| LR699155.1 | 119656359 | 119657253 | locus36732.1 | 731.07 + | 119656359 | 119657253 | 0,0,255 | 1 | 894 | 0 |
| LR699155.1 | 119715611 | 119716505 | locus36733.1 | 729.17 + | 119715611 | 119716505 | 0,0,255 | 1 | 894 | 0 |
| LR699155.1 | 119764824 | 119765718 | locus36734.1 | 732.67 + | 119764824 | 119765718 | 0,0,255 | 1 | 894 | 0 |
| LR699155.1 | 119808317 | 119809211 | locus36735.1 | 735.65 + | 119808317 | 119809211 | 0,0,255 | 1 | 894 | 0 |
| LR699155.1 | 119846364 | 119847258 | locus36736.1 | 729.91 + | 119846364 | 119847258 | 0,0,255 | 1 | 894 | 0 |
| LR699155.1 | 119901002 | 119901797 | locus36738.1 | 640.16 + | 119901002 | 119901797 | 0,0,255 | 1 | 795 | 0 |
| LR699155.1 | 120040733 | 120041627 | locus36740.1 | 732.32 + | 120040733 | 120041627 | 0,0,255 | 1 | 894 | 0 |
| LR699155.1 | 120138907 | 120139801 | locus36742.1 | 731.04 + | 120138907 | 120139801 | 0,0,255 | 1 | 894 | 0 |
| LR699155.1 | 120235603 | 120236497 | locus36743.1 | 732.56 + | 120235603 | 120236497 | 0,0,255 | 1 | 894 | 0 |
| LR699155.1 | 120291050 | 120291944 | locus36744.1 | 725.55 + | 120291050 | 120291944 | 0,0,255 | 1 | 894 | 0 |
| LR699155.1 | 130972543 | 130973506 | locus36860.1 | 751.11 - | 130972543 | 130973506 | 0,0,255 | 1 | 963 | 0 |
| LR699155.1 | 131064468 | 131065407 | locus36862.1 | 760.99 + | 131064468 | 131065407 | 0,0,255 | 1 | 939 | 0 |
| LR699155.1 | 134146095 | 134147004 | locus36882.1 | 733.24 - | 134146095 | 134147004 | 0,0,255 | 1 | 909 | 0 |



|            |           |           |              |          |           |           |         |   |     |   |
|------------|-----------|-----------|--------------|----------|-----------|-----------|---------|---|-----|---|
| LR699155.1 | 134186404 | 134187313 | locus36883.1 | 732.41 - | 134186404 | 134187313 | 0,0,255 | 1 | 909 | 0 |
| LR699155.1 | 134230892 | 134231801 | locus36884.1 | 732.41 - | 134230892 | 134231801 | 0,0,255 | 1 | 909 | 0 |
| LR699155.1 | 134283980 | 134284889 | locus36885.1 | 731.12 - | 134283980 | 134284889 | 0,0,255 | 1 | 909 | 0 |
| LR699155.1 | 134330989 | 134331898 | locus36886.1 | 735.73 - | 134330989 | 134331898 | 0,0,255 | 1 | 909 | 0 |
| LR699155.1 | 134429384 | 134430296 | locus36888.1 | 739.78 - | 134429384 | 134430296 | 0,0,255 | 1 | 912 | 0 |
| LR699155.1 | 134522068 | 134522977 | locus36891.1 | 734.17 - | 134522068 | 134522977 | 0,0,255 | 1 | 909 | 0 |
| LR699155.1 | 134566990 | 134567899 | locus36892.1 | 731.67 - | 134566990 | 134567899 | 0,0,255 | 1 | 909 | 0 |
| LR699155.1 | 134756206 | 134757115 | locus36893.1 | 731.67 - | 134756206 | 134757115 | 0,0,255 | 1 | 909 | 0 |
| LR699155.1 | 134803810 | 134804719 | locus36895.1 | 731.12 - | 134803810 | 134804719 | 0,0,255 | 1 | 909 | 0 |
| LR699155.1 | 134837467 | 134838379 | locus36896.1 | 737.01 - | 134837467 | 134838379 | 0,0,255 | 1 | 912 | 0 |
| LR699155.1 | 134875233 | 134876142 | locus36898.1 | 734.94 - | 134875233 | 134876142 | 0,0,255 | 1 | 909 | 0 |
| LR699155.1 | 134979490 | 134980399 | locus36900.1 | 734.19 - | 134979490 | 134980399 | 0,0,255 | 1 | 909 | 0 |
| LR699155.1 | 135520728 | 135521622 | locus36907.1 | 733.12 + | 135520728 | 135521622 | 0,0,255 | 1 | 894 | 0 |
| LR699155.1 | 135560679 | 135561573 | locus36908.1 | 733.25 + | 135560679 | 135561573 | 0,0,255 | 1 | 894 | 0 |
| LR699155.1 | 135595258 | 135596161 | locus36909.1 | 737.13 + | 135595258 | 135596161 | 0,0,255 | 1 | 903 | 0 |
| LR699155.1 | 135626048 | 135626942 | locus36910.1 | 734.05 + | 135626048 | 135626942 | 0,0,255 | 1 | 894 | 0 |
| LR699155.1 | 135653943 | 135654846 | locus36911.1 | 738.91 + | 135653943 | 135654846 | 0,0,255 | 1 | 903 | 0 |
| LR699155.1 | 135664608 | 135665511 | locus36912.1 | 740.82 - | 135664608 | 135665511 | 0,0,255 | 1 | 903 | 0 |
| LR699155.1 | 135711963 | 135712857 | locus36913.1 | 733.92 - | 135711963 | 135712857 | 0,0,255 | 1 | 894 | 0 |
| LR699155.1 | 135738061 | 135738955 | locus36915.1 | 734.03 - | 135738061 | 135738955 | 0,0,255 | 1 | 894 | 0 |
| LR699155.1 | 135907700 | 135908600 | locus36917.1 | 735.49 - | 135907700 | 135908600 | 0,0,255 | 1 | 900 | 0 |
| LR699155.1 | 136253768 | 136254662 | locus36920.1 | 739.05 - | 136253768 | 136254662 | 0,0,255 | 1 | 894 | 0 |
| LR699155.1 | 136293371 | 136294265 | locus36921.1 | 737.63 - | 136293371 | 136294265 | 0,0,255 | 1 | 894 | 0 |
| LR699155.1 | 136417898 | 136418792 | locus36926.1 | 728.34 - | 136417898 | 136418792 | 0,0,255 | 1 | 894 | 0 |

|            |           |           |              |          |           |           |         |   |     |   |
|------------|-----------|-----------|--------------|----------|-----------|-----------|---------|---|-----|---|
| LR699155.1 | 136464911 | 136465832 | locus36928.1 | 750.97 - | 136464911 | 136465832 | 0,0,255 | 1 | 921 | 0 |
| LR699155.1 | 136515857 | 136516778 | locus36931.1 | 751.82 - | 136515857 | 136516778 | 0,0,255 | 1 | 921 | 0 |
| LR699155.1 | 136596668 | 136597589 | locus36934.1 | 748.68 - | 136596668 | 136597589 | 0,0,255 | 1 | 921 | 0 |
| LR699155.1 | 136647593 | 136648514 | locus36937.1 | 749.62 - | 136647593 | 136648514 | 0,0,255 | 1 | 921 | 0 |
| LR699155.1 | 136711929 | 136712850 | locus36939.1 | 757.58 + | 136711929 | 136712850 | 0,0,255 | 1 | 921 | 0 |
| LR699155.1 | 136752845 | 136753766 | locus36940.1 | 749.95 + | 136752845 | 136753766 | 0,0,255 | 1 | 921 | 0 |
| LR699155.1 | 136818561 | 136819482 | locus36942.1 | 747.39 + | 136818561 | 136819482 | 0,0,255 | 1 | 921 | 0 |
| LR699155.1 | 136867269 | 136868163 | locus36943.1 | 734.31 + | 136867269 | 136868163 | 0,0,255 | 1 | 894 | 0 |
| LR699155.1 | 136924397 | 136925291 | locus36944.1 | 732.94 + | 136924397 | 136925291 | 0,0,255 | 1 | 894 | 0 |
| LR699155.1 | 137012054 | 137012948 | locus36946.1 | 734.5 +  | 137012054 | 137012948 | 0,0,255 | 1 | 894 | 0 |
| LR699155.1 | 137037904 | 137038798 | locus36947.1 | 736.11 + | 137037904 | 137038798 | 0,0,255 | 1 | 894 | 0 |
| LR699155.1 | 137064077 | 137064971 | locus36948.1 | 732.87 + | 137064077 | 137064971 | 0,0,255 | 1 | 894 | 0 |
| LR699155.1 | 137136386 | 137137211 | locus36949.1 | 704.06 + | 137136386 | 137137211 | 0,0,255 | 1 | 825 | 0 |
| LR699155.1 | 137228543 | 137229437 | locus36950.1 | 731.68 + | 137228543 | 137229437 | 0,0,255 | 1 | 894 | 0 |
| LR699155.1 | 137281666 | 137282560 | locus36951.1 | 724.89 + | 137281666 | 137282560 | 0,0,255 | 1 | 894 | 0 |
| LR699155.1 | 137325379 | 137326264 | locus36954.1 | 729.09 + | 137325379 | 137326264 | 0,0,255 | 1 | 885 | 0 |
| LR699155.1 | 137366651 | 137367545 | locus36955.1 | 735.19 + | 137366651 | 137367545 | 0,0,255 | 1 | 894 | 0 |
| LR699155.1 | 137458179 | 137459073 | locus36959.1 | 734.7 -  | 137458179 | 137459073 | 0,0,255 | 1 | 894 | 0 |
| LR699155.1 | 137472008 | 137472890 | locus36960.1 | 721.13 - | 137472008 | 137472890 | 0,0,255 | 1 | 882 | 0 |
| LR699155.1 | 137523138 | 137524032 | locus36962.1 | 731.98 - | 137523138 | 137524032 | 0,0,255 | 1 | 894 | 0 |
| LR699155.1 | 137553143 | 137554037 | locus36963.1 | 732.51 - | 137553143 | 137554037 | 0,0,255 | 1 | 894 | 0 |
| LR699155.1 | 137767704 | 137768613 | locus36974.1 | 745.84 + | 137767704 | 137768613 | 0,0,255 | 1 | 909 | 0 |
| LR699155.1 | 137790050 | 137790959 | locus36976.1 | 746.2 +  | 137790050 | 137790959 | 0,0,255 | 1 | 909 | 0 |
| LR699155.1 | 137840577 | 137841486 | locus36981.1 | 746.2 +  | 137840577 | 137841486 | 0,0,255 | 1 | 909 | 0 |

|            |          |          |              |          |          |          |         |   |      |   |
|------------|----------|----------|--------------|----------|----------|----------|---------|---|------|---|
| LR699157.1 | 95062657 | 95063512 | locus40274.1 | 694.58 + | 95062657 | 95063512 | 0,0,255 | 1 | 855  | 0 |
| LR699157.1 | 95113206 | 95114118 | locus40276.1 | 752.94 + | 95113206 | 95114118 | 0,0,255 | 1 | 912  | 0 |
| LR699157.1 | 95227104 | 95228025 | locus40278.1 | 759.19 - | 95227104 | 95228025 | 0,0,255 | 1 | 921  | 0 |
| LR699157.1 | 95537468 | 95538362 | locus40280.1 | 748.19 - | 95537468 | 95538362 | 0,0,255 | 1 | 894  | 0 |
| LR699157.1 | 95669367 | 95670261 | locus40281.1 | 730.55 - | 95669367 | 95670261 | 0,0,255 | 1 | 894  | 0 |
| LR699157.1 | 95806893 | 95807787 | locus40283.1 | 733.65 - | 95806893 | 95807787 | 0,0,255 | 1 | 894  | 0 |
| LR699157.1 | 95911461 | 95912373 | locus40284.1 | 746.6 -  | 95911461 | 95912373 | 0,0,255 | 1 | 912  | 0 |
| LR699157.1 | 96085334 | 96086237 | locus40286.1 | 738.18 - | 96085334 | 96086237 | 0,0,255 | 1 | 903  | 0 |
| LR699157.1 | 96327021 | 96327939 | locus40288.1 | 763.81 + | 96327021 | 96327939 | 0,0,255 | 1 | 918  | 0 |
| LR699157.1 | 96547458 | 96548340 | locus40291.1 | 721.99 + | 96547458 | 96548340 | 0,0,255 | 1 | 882  | 0 |
| LR699157.1 | 97245280 | 97246174 | locus40294.1 | 734.61 + | 97245280 | 97246174 | 0,0,255 | 1 | 894  | 0 |
| LR699157.1 | 97482784 | 97483696 | locus40296.1 | 753.26 - | 97482784 | 97483696 | 0,0,255 | 1 | 912  | 0 |
| LR699157.1 | 97702293 | 97703307 | locus40297.1 | 833.83 - | 97702293 | 97703307 | 0,0,255 | 1 | 1014 | 0 |
| LR699157.1 | 97880269 | 97881163 | locus40302.1 | 730.47 - | 97880269 | 97881163 | 0,0,255 | 1 | 894  | 0 |
| LR699157.1 | 97970706 | 97971609 | locus40303.1 | 736.29 - | 97970706 | 97971609 | 0,0,255 | 1 | 903  | 0 |
| LR699157.1 | 98087627 | 98088521 | locus40306.1 | 731.31 + | 98087627 | 98088521 | 0,0,255 | 1 | 894  | 0 |
| LR699157.1 | 98251224 | 98252130 | locus40307.1 | 745.06 + | 98251224 | 98252130 | 0,0,255 | 1 | 906  | 0 |
| LR699157.1 | 98300680 | 98301586 | locus40308.1 | 744.23 + | 98300680 | 98301586 | 0,0,255 | 1 | 906  | 0 |
| LR699157.1 | 98424987 | 98425893 | locus40309.1 | 745.15 + | 98424987 | 98425893 | 0,0,255 | 1 | 906  | 0 |
| LR699157.1 | 98544740 | 98545646 | locus40310.1 | 744.2 +  | 98544740 | 98545646 | 0,0,255 | 1 | 906  | 0 |
| LR699157.1 | 98605968 | 98606874 | locus40311.1 | 744.79 + | 98605968 | 98606874 | 0,0,255 | 1 | 906  | 0 |
| LR699157.1 | 98689183 | 98690074 | locus40312.1 | 728.82 - | 98689183 | 98690074 | 0,0,255 | 1 | 891  | 0 |
| LR699157.1 | 98944360 | 98945254 | locus40313.1 | 726.04 - | 98944360 | 98945254 | 0,0,255 | 1 | 894  | 0 |
| LR699157.1 | 99010740 | 99011709 | locus40314.1 | 755.54 - | 99010740 | 99011709 | 0,0,255 | 1 | 969  | 0 |

|            |           |           |              |          |           |           |         |   |      |   |
|------------|-----------|-----------|--------------|----------|-----------|-----------|---------|---|------|---|
| LR699157.1 | 99080992  | 99081886  | locus40315.1 | 732.31 - | 99080992  | 99081886  | 0,0,255 | 1 | 894  | 0 |
| LR699157.1 | 99271936  | 99272830  | locus40317.1 | 730.47 - | 99271936  | 99272830  | 0,0,255 | 1 | 894  | 0 |
| LR699157.1 | 99354872  | 99355766  | locus40318.1 | 731.14 - | 99354872  | 99355766  | 0,0,255 | 1 | 894  | 0 |
| LR699157.1 | 99494894  | 99495788  | locus40321.1 | 731.7 -  | 99494894  | 99495788  | 0,0,255 | 1 | 894  | 0 |
| LR699157.1 | 99570440  | 99571334  | locus40322.1 | 736.27 - | 99570440  | 99571334  | 0,0,255 | 1 | 894  | 0 |
| LR699157.1 | 99679259  | 99680153  | locus40323.1 | 731.33 - | 99679259  | 99680153  | 0,0,255 | 1 | 894  | 0 |
| LR699157.1 | 99799023  | 99799917  | locus40325.1 | 733.22 - | 99799023  | 99799917  | 0,0,255 | 1 | 894  | 0 |
| LR699157.1 | 99963283  | 99964186  | locus40327.1 | 751.45 + | 99963283  | 99964186  | 0,0,255 | 1 | 903  | 0 |
| LR699157.1 | 100011049 | 100012000 | locus40328.1 | 779.48 + | 100011049 | 100012000 | 0,0,255 | 1 | 951  | 0 |
| LR699157.1 | 100063084 | 100064029 | locus40329.1 | 779.86 + | 100063084 | 100064029 | 0,0,255 | 1 | 945  | 0 |
| LR699157.1 | 100161462 | 100162446 | locus40331.1 | 770.08 - | 100161462 | 100162446 | 0,0,255 | 1 | 984  | 0 |
| LR699157.1 | 100234236 | 100235139 | locus40332.1 | 741.81 - | 100234236 | 100235139 | 0,0,255 | 1 | 903  | 0 |
| LR699157.1 | 100446073 | 100446997 | locus40334.1 | 756.79 + | 100446073 | 100446997 | 0,0,255 | 1 | 924  | 0 |
| LR699157.1 | 100530273 | 100531284 | locus40335.1 | 827.25 + | 100530273 | 100531284 | 0,0,255 | 1 | 1011 | 0 |
| LR699157.1 | 100619386 | 100620310 | locus40336.1 | 758.04 + | 100619386 | 100620310 | 0,0,255 | 1 | 924  | 0 |
| LR699157.1 | 100704039 | 100704963 | locus40337.1 | 758.39 + | 100704039 | 100704963 | 0,0,255 | 1 | 924  | 0 |
| LR699157.1 | 100783653 | 100784577 | locus40338.1 | 753.59 + | 100783653 | 100784577 | 0,0,255 | 1 | 924  | 0 |
| LR699157.1 | 100804798 | 100805692 | locus40339.1 | 731.55 - | 100804798 | 100805692 | 0,0,255 | 1 | 894  | 0 |
| LR699157.1 | 100923341 | 100924262 | locus40341.1 | 751.71 + | 100923341 | 100924262 | 0,0,255 | 1 | 921  | 0 |
| LR699157.1 | 100935936 | 100936830 | locus40342.1 | 733.34 - | 100935936 | 100936830 | 0,0,255 | 1 | 894  | 0 |
| LR699157.1 | 101039811 | 101040732 | locus40343.1 | 753.07 - | 101039811 | 101040732 | 0,0,255 | 1 | 921  | 0 |
| LR699157.1 | 101116783 | 101117704 | locus40344.1 | 752.57 - | 101116783 | 101117704 | 0,0,255 | 1 | 921  | 0 |
| LR699157.1 | 101222064 | 101222985 | locus40345.1 | 752.46 + | 101222064 | 101222985 | 0,0,255 | 1 | 921  | 0 |
| LR699157.1 | 101289913 | 101290807 | locus40348.1 | 724.96 - | 101289913 | 101290807 | 0,0,255 | 1 | 894  | 0 |

|            |           |           |              |          |           |           |         |   |      |   |
|------------|-----------|-----------|--------------|----------|-----------|-----------|---------|---|------|---|
| LR699157.1 | 101386980 | 101387883 | locus40349.1 | 741.07 + | 101386980 | 101387883 | 0,0,255 | 1 | 903  | 0 |
| LR699157.1 | 101499018 | 101499912 | locus40354.1 | 736.71 + | 101499018 | 101499912 | 0,0,255 | 1 | 894  | 0 |
| LR699157.1 | 101567284 | 101568202 | locus40355.1 | 760.85 + | 101567284 | 101568202 | 0,0,255 | 1 | 918  | 0 |
| LR699157.1 | 101618109 | 101619030 | locus40356.1 | 757.17 + | 101618109 | 101619030 | 0,0,255 | 1 | 921  | 0 |
| LR699157.1 | 101742020 | 101742932 | locus40360.1 | 750.06 + | 101742020 | 101742932 | 0,0,255 | 1 | 912  | 0 |
| LR699157.1 | 101846600 | 101847500 | locus40361.1 | 737.81 + | 101846600 | 101847500 | 0,0,255 | 1 | 900  | 0 |
| LR699157.1 | 101993509 | 101994409 | locus40362.1 | 738.59 + | 101993509 | 101994409 | 0,0,255 | 1 | 900  | 0 |
| LR699157.1 | 102069442 | 102070336 | locus40363.1 | 728.79 + | 102069442 | 102070336 | 0,0,255 | 1 | 894  | 0 |
| LR699157.1 | 102147284 | 102148208 | locus40364.1 | 758.06 + | 102147284 | 102148208 | 0,0,255 | 1 | 924  | 0 |
| LR699157.1 | 102223317 | 102224238 | locus40365.1 | 759.32 + | 102223317 | 102224238 | 0,0,255 | 1 | 921  | 0 |
| LR699157.1 | 102375245 | 102376280 | locus40369.1 | 845.14 + | 102375245 | 102376280 | 0,0,255 | 1 | 1035 | 0 |
| LR699157.1 | 102555817 | 102556711 | locus40370.1 | 786.69 + | 102555817 | 102556711 | 0,0,255 | 1 | 894  | 0 |
| LR699157.1 | 102681207 | 102682128 | locus40371.1 | 756.9 +  | 102681207 | 102682128 | 0,0,255 | 1 | 921  | 0 |
| LR699157.1 | 102925797 | 102926808 | locus40376.1 | 820.93 + | 102925797 | 102926808 | 0,0,255 | 1 | 1011 | 0 |
| LR699157.1 | 102934062 | 102935073 | locus40377.1 | 820.07 + | 102934062 | 102935073 | 0,0,255 | 1 | 1011 | 0 |
| LR699157.1 | 103103897 | 103104908 | locus40379.1 | 818.63 + | 103103897 | 103104908 | 0,0,255 | 1 | 1011 | 0 |
| LR699157.1 | 103311773 | 103312784 | locus40382.1 | 820.75 + | 103311773 | 103312784 | 0,0,255 | 1 | 1011 | 0 |
| LR699157.1 | 103483139 | 103484033 | locus40384.1 | 790.69 + | 103483139 | 103484033 | 0,0,255 | 1 | 894  | 0 |
| LR699157.1 | 103578627 | 103579521 | locus40385.1 | 736.97 + | 103578627 | 103579521 | 0,0,255 | 1 | 894  | 0 |
| LR699157.1 | 103609951 | 103610899 | locus40387.1 | 761.15 - | 103609951 | 103610899 | 0,0,255 | 1 | 948  | 0 |
| LR699157.1 | 103665607 | 103666531 | locus40390.1 | 760.77 - | 103665607 | 103666531 | 0,0,255 | 1 | 924  | 0 |
| LR699157.1 | 103809421 | 103810372 | locus40392.1 | 793.88 + | 103809421 | 103810372 | 0,0,255 | 1 | 951  | 0 |
| LR699157.1 | 103836885 | 103837842 | locus40393.1 | 775.76 - | 103836885 | 103837842 | 0,0,255 | 1 | 957  | 0 |
| LR699157.1 | 104036745 | 104037648 | locus40394.1 | 741.54 - | 104036745 | 104037648 | 0,0,255 | 1 | 903  | 0 |

|            |           |           |              |          |           |           |         |   |     |   |
|------------|-----------|-----------|--------------|----------|-----------|-----------|---------|---|-----|---|
| LR699157.1 | 104092837 | 104093731 | locus40395.1 | 732.66 + | 104092837 | 104093731 | 0,0,255 | 1 | 894 | 0 |
| LR699157.1 | 104129395 | 104130289 | locus40397.1 | 731.61 - | 104129395 | 104130289 | 0,0,255 | 1 | 894 | 0 |
| LR699157.1 | 104202391 | 104203285 | locus40400.1 | 736.04 - | 104202391 | 104203285 | 0,0,255 | 1 | 894 | 0 |
| LR699157.1 | 104252249 | 104253143 | locus40401.1 | 733.38 - | 104252249 | 104253143 | 0,0,255 | 1 | 894 | 0 |
| LR699157.1 | 104351667 | 104352558 | locus40402.1 | 727.87 - | 104351667 | 104352558 | 0,0,255 | 1 | 891 | 0 |
| LR699157.1 | 104411664 | 104412558 | locus40403.1 | 733.24 - | 104411664 | 104412558 | 0,0,255 | 1 | 894 | 0 |
| LR699157.1 | 104478208 | 104479102 | locus40404.1 | 728.81 - | 104478208 | 104479102 | 0,0,255 | 1 | 894 | 0 |
| LR699157.1 | 104549155 | 104550049 | locus40406.1 | 735.19 - | 104549155 | 104550049 | 0,0,255 | 1 | 894 | 0 |
| LR699157.1 | 104604086 | 104604980 | locus40407.1 | 732.32 - | 104604086 | 104604980 | 0,0,255 | 1 | 894 | 0 |
| LR699157.1 | 104681956 | 104682850 | locus40408.1 | 730.93 - | 104681956 | 104682850 | 0,0,255 | 1 | 894 | 0 |
| LR699157.1 | 104732008 | 104732977 | locus40409.1 | 798.41 + | 104732008 | 104732977 | 0,0,255 | 1 | 969 | 0 |
| LR699157.1 | 104793182 | 104794124 | locus40410.1 | 773.99 + | 104793182 | 104794124 | 0,0,255 | 1 | 942 | 0 |
| LR699157.1 | 104815528 | 104816434 | locus40412.1 | 744.49 + | 104815528 | 104816434 | 0,0,255 | 1 | 906 | 0 |
| LR699157.1 | 104822752 | 104823652 | locus40413.1 | 743.5 -  | 104822752 | 104823652 | 0,0,255 | 1 | 900 | 0 |
| LR699157.1 | 104854916 | 104855816 | locus40414.1 | 737.94 - | 104854916 | 104855816 | 0,0,255 | 1 | 900 | 0 |
| LR699157.1 | 104884858 | 104885749 | locus40415.1 | 733.84 - | 104884858 | 104885749 | 0,0,255 | 1 | 891 | 0 |
| LR699157.1 | 104900179 | 104901073 | locus40416.1 | 731.41 - | 104900179 | 104901073 | 0,0,255 | 1 | 894 | 0 |
| LR699157.1 | 105023369 | 105024260 | locus40417.1 | 738.04 + | 105023369 | 105024260 | 0,0,255 | 1 | 891 | 0 |
| LR699157.1 | 105139484 | 105140375 | locus40418.1 | 734.02 - | 105139484 | 105140375 | 0,0,255 | 1 | 891 | 0 |
| LR699157.1 | 105229068 | 105229899 | locus40420.1 | 709.56 - | 105229068 | 105229899 | 0,0,255 | 1 | 831 | 0 |
| LR699157.1 | 105285046 | 105286012 | locus40421.1 | 797.67 - | 105285046 | 105286012 | 0,0,255 | 1 | 966 | 0 |
| LR699157.1 | 105298256 | 105299222 | locus40422.1 | 797.67 - | 105298256 | 105299222 | 0,0,255 | 1 | 966 | 0 |
| LR699157.1 | 105400441 | 105401377 | locus40424.1 | 772.72 + | 105400441 | 105401377 | 0,0,255 | 1 | 936 | 0 |
| LR699157.1 | 105474214 | 105475108 | locus40426.1 | 750.85 + | 105474214 | 105475108 | 0,0,255 | 1 | 894 | 0 |

|            |           |           |              |          |           |           |         |   |     |   |
|------------|-----------|-----------|--------------|----------|-----------|-----------|---------|---|-----|---|
| LR699157.1 | 105486202 | 105487183 | locus40428.1 | 809.23 - | 105486202 | 105487183 | 0,0,255 | 1 | 981 | 0 |
| LR699157.1 | 105564377 | 105565271 | locus40429.1 | 729.63 + | 105564377 | 105565271 | 0,0,255 | 1 | 894 | 0 |
| LR699157.1 | 105675363 | 105676299 | locus40431.1 | 766.93 + | 105675363 | 105676299 | 0,0,255 | 1 | 936 | 0 |
| LR699157.1 | 105744248 | 105745139 | locus40432.1 | 732.25 + | 105744248 | 105745139 | 0,0,255 | 1 | 891 | 0 |
| LR699157.1 | 105756765 | 105757740 | locus40433.1 | 755.91 - | 105756765 | 105757740 | 0,0,255 | 1 | 975 | 0 |
| LR699157.1 | 105836184 | 105837084 | locus40434.1 | 743.59 - | 105836184 | 105837084 | 0,0,255 | 1 | 900 | 0 |
| LR699157.1 | 105880682 | 105881576 | locus40435.1 | 729.37 - | 105880682 | 105881576 | 0,0,255 | 1 | 894 | 0 |
| LR699157.1 | 106038323 | 106039244 | locus40438.1 | 752.75 + | 106038323 | 106039244 | 0,0,255 | 1 | 921 | 0 |
| LR699157.1 | 106120230 | 106121130 | locus40440.1 | 734.33 + | 106120230 | 106121130 | 0,0,255 | 1 | 900 | 0 |
| LR699157.1 | 106204843 | 106205764 | locus40441.1 | 749.76 + | 106204843 | 106205764 | 0,0,255 | 1 | 921 | 0 |
| LR699157.1 | 106271978 | 106272863 | locus40443.1 | 724.59 + | 106271978 | 106272863 | 0,0,255 | 1 | 885 | 0 |
| LR699157.1 | 106353867 | 106354770 | locus40446.1 | 741.4 +  | 106353867 | 106354770 | 0,0,255 | 1 | 903 | 0 |
| LR699157.1 | 106370625 | 106371528 | locus40447.1 | 741.2 -  | 106370625 | 106371528 | 0,0,255 | 1 | 903 | 0 |
| LR699157.1 | 106469627 | 106470551 | locus40448.1 | 755.44 + | 106469627 | 106470551 | 0,0,255 | 1 | 924 | 0 |
| LR699157.1 | 106499862 | 106500786 | locus40450.1 | 757.5 -  | 106499862 | 106500786 | 0,0,255 | 1 | 924 | 0 |
| LR699157.1 | 106648955 | 106649879 | locus40454.1 | 762.44 - | 106648955 | 106649879 | 0,0,255 | 1 | 924 | 0 |
| LR699157.1 | 106701054 | 106702041 | locus40455.1 | 826.28 - | 106701054 | 106702041 | 0,0,255 | 1 | 987 | 0 |
| LR699157.1 | 106796058 | 106796952 | locus40458.1 | 733.6 -  | 106796058 | 106796952 | 0,0,255 | 1 | 894 | 0 |
| LR699157.1 | 106837933 | 106838827 | locus40460.1 | 734.89 - | 106837933 | 106838827 | 0,0,255 | 1 | 894 | 0 |
| LR699157.1 | 106887433 | 106888327 | locus40462.1 | 734.95 - | 106887433 | 106888327 | 0,0,255 | 1 | 894 | 0 |
| LR699157.1 | 106935667 | 106936561 | locus40463.1 | 736.51 - | 106935667 | 106936561 | 0,0,255 | 1 | 894 | 0 |
| LR699157.1 | 106974811 | 106975735 | locus40464.1 | 766.03 - | 106974811 | 106975735 | 0,0,255 | 1 | 924 | 0 |
| LR699157.1 | 107027682 | 107028624 | locus40466.1 | 773.44 - | 107027682 | 107028624 | 0,0,255 | 1 | 942 | 0 |
| LR699157.1 | 107131560 | 107132490 | locus40467.1 | 761.81 + | 107131560 | 107132490 | 0,0,255 | 1 | 930 | 0 |

|            |           |           |              |          |           |           |         |   |      |   |
|------------|-----------|-----------|--------------|----------|-----------|-----------|---------|---|------|---|
| LR699157.1 | 107172022 | 107172967 | locus40469.1 | 780.54 - | 107172022 | 107172967 | 0,0,255 | 1 | 945  | 0 |
| LR699157.1 | 107313862 | 107314756 | locus40470.1 | 737.26 + | 107313862 | 107314756 | 0,0,255 | 1 | 894  | 0 |
| LR699157.1 | 107429242 | 107430136 | locus40473.1 | 737.43 + | 107429242 | 107430136 | 0,0,255 | 1 | 894  | 0 |
| LR699157.1 | 107505401 | 107506295 | locus40476.1 | 730.55 + | 107505401 | 107506295 | 0,0,255 | 1 | 894  | 0 |
| LR699157.1 | 107564708 | 107565602 | locus40477.1 | 732.53 + | 107564708 | 107565602 | 0,0,255 | 1 | 894  | 0 |
| LR699157.1 | 107632749 | 107633643 | locus40480.1 | 735.98 + | 107632749 | 107633643 | 0,0,255 | 1 | 894  | 0 |
| LR699157.1 | 107670002 | 107670896 | locus40481.1 | 731.73 + | 107670002 | 107670896 | 0,0,255 | 1 | 894  | 0 |
| LR699157.1 | 107727124 | 107728009 | locus40485.1 | 725.34 + | 107727124 | 107728009 | 0,0,255 | 1 | 885  | 0 |
| LR699157.1 | 107804017 | 107804911 | locus40486.1 | 732.26 + | 107804017 | 107804911 | 0,0,255 | 1 | 894  | 0 |
| LR699157.1 | 107821483 | 107822503 | locus40487.1 | 768.71 - | 107821483 | 107822503 | 0,0,255 | 1 | 1020 | 0 |
| LR699157.1 | 107882045 | 107883038 | locus40489.1 | 826.11 - | 107882045 | 107883038 | 0,0,255 | 1 | 993  | 0 |
| LR699157.1 | 107986510 | 107987413 | locus40490.1 | 739.22 + | 107986510 | 107987413 | 0,0,255 | 1 | 903  | 0 |
| LR699157.1 | 108008100 | 108009003 | locus40491.1 | 739.2 +  | 108008100 | 108009003 | 0,0,255 | 1 | 903  | 0 |
| LR699157.1 | 108026740 | 108027664 | locus40492.1 | 769.76 - | 108026740 | 108027664 | 0,0,255 | 1 | 924  | 0 |
| LR699157.1 | 108137460 | 108138348 | locus40494.1 | 725.41 + | 108137460 | 108138348 | 0,0,255 | 1 | 888  | 0 |
| LR699157.1 | 108275397 | 108276285 | locus40497.1 | 723.63 + | 108275397 | 108276285 | 0,0,255 | 1 | 888  | 0 |
| LR699157.1 | 108300028 | 108300916 | locus40498.1 | 729.17 + | 108300028 | 108300916 | 0,0,255 | 1 | 888  | 0 |
| LR699157.1 | 108353043 | 108353931 | locus40499.1 | 727.94 + | 108353043 | 108353931 | 0,0,255 | 1 | 888  | 0 |
| LR699157.1 | 108532693 | 108533581 | locus40502.1 | 727.77 + | 108532693 | 108533581 | 0,0,255 | 1 | 888  | 0 |
| LR699157.1 | 108625788 | 108626676 | locus40504.1 | 724.28 + | 108625788 | 108626676 | 0,0,255 | 1 | 888  | 0 |
| LR699157.1 | 108680607 | 108681501 | locus40506.1 | 734.57 + | 108680607 | 108681501 | 0,0,255 | 1 | 894  | 0 |
| LR699157.1 | 108789178 | 108790135 | locus40508.1 | 787.9 +  | 108789178 | 108790135 | 0,0,255 | 1 | 957  | 0 |
| LR699157.1 | 108839533 | 108840427 | locus40509.1 | 726.89 + | 108839533 | 108840427 | 0,0,255 | 1 | 894  | 0 |
| LR699157.1 | 108911615 | 108912518 | locus40511.1 | 738.37 + | 108911615 | 108912518 | 0,0,255 | 1 | 903  | 0 |



|            |           |           |              |          |           |           |         |   |     |   |
|------------|-----------|-----------|--------------|----------|-----------|-----------|---------|---|-----|---|
| LR699157.1 | 108986539 | 108987505 | locus40513.1 | 801.07 + | 108986539 | 108987505 | 0,0,255 | 1 | 966 | 0 |
| LR699157.1 | 109003250 | 109004162 | locus40514.1 | 753.31 - | 109003250 | 109004162 | 0,0,255 | 1 | 912 | 0 |
| LR699157.1 | 109262621 | 109263551 | locus40517.1 | 767.45 - | 109262621 | 109263551 | 0,0,255 | 1 | 930 | 0 |
| LR699157.1 | 109362718 | 109363603 | locus40518.1 | 735 -    | 109362718 | 109363603 | 0,0,255 | 1 | 885 | 0 |
| LR699157.1 | 109423540 | 109424422 | locus40519.1 | 696.2 -  | 109423540 | 109424422 | 0,0,255 | 1 | 882 | 0 |
| LR699157.1 | 109521576 | 109522458 | locus40520.1 | 726.59 + | 109521576 | 109522458 | 0,0,255 | 1 | 882 | 0 |
| LR699157.1 | 109608190 | 109609075 | locus40522.1 | 729.89 + | 109608190 | 109609075 | 0,0,255 | 1 | 885 | 0 |
| LR699157.1 | 109658305 | 109659190 | locus40523.1 | 731.83 + | 109658305 | 109659190 | 0,0,255 | 1 | 885 | 0 |
| LR699157.1 | 109701965 | 109702850 | locus40524.1 | 733.11 + | 109701965 | 109702850 | 0,0,255 | 1 | 885 | 0 |
| LR699157.1 | 109732771 | 109733656 | locus40525.1 | 733.82 - | 109732771 | 109733656 | 0,0,255 | 1 | 885 | 0 |
| LR699157.1 | 109776449 | 109777373 | locus40526.1 | 762.86 - | 109776449 | 109777373 | 0,0,255 | 1 | 924 | 0 |
| LR699157.1 | 109807220 | 109808105 | locus40527.1 | 710.92 - | 109807220 | 109808105 | 0,0,255 | 1 | 885 | 0 |
| LR699157.1 | 109871761 | 109872760 | locus40528.1 | 779.04 - | 109871761 | 109872760 | 0,0,255 | 1 | 999 | 0 |
| LR699157.1 | 109922567 | 109923452 | locus40530.1 | 726.37 - | 109922567 | 109923452 | 0,0,255 | 1 | 885 | 0 |
| LR699157.1 | 110034098 | 110035016 | locus40531.1 | 743.94 - | 110034098 | 110035016 | 0,0,255 | 1 | 918 | 0 |
| LR699157.1 | 110126450 | 110127386 | locus40533.1 | 772.72 - | 110126450 | 110127386 | 0,0,255 | 1 | 936 | 0 |
| LR699157.1 | 110215511 | 110216396 | locus40534.1 | 720.18 - | 110215511 | 110216396 | 0,0,255 | 1 | 885 | 0 |
| LR699157.1 | 110309727 | 110310612 | locus40537.1 | 728.66 - | 110309727 | 110310612 | 0,0,255 | 1 | 885 | 0 |
| LR699157.1 | 110417353 | 110418238 | locus40538.1 | 727.42 - | 110417353 | 110418238 | 0,0,255 | 1 | 885 | 0 |
| LR699157.1 | 110468381 | 110469266 | locus40539.1 | 730.56 - | 110468381 | 110469266 | 0,0,255 | 1 | 885 | 0 |
| LR699157.1 | 110531067 | 110532045 | locus40540.1 | 755.65 - | 110531067 | 110532045 | 0,0,255 | 1 | 978 | 0 |
| LR699157.1 | 110562731 | 110563718 | locus40541.1 | 789.37 - | 110562731 | 110563718 | 0,0,255 | 1 | 987 | 0 |
| LR699157.1 | 112662266 | 112663187 | locus40565.1 | 757.04 + | 112662266 | 112663187 | 0,0,255 | 1 | 921 | 0 |
| LR699157.1 | 112706537 | 112707461 | locus40566.1 | 764.67 + | 112706537 | 112707461 | 0,0,255 | 1 | 924 | 0 |

|            |           |           |              |          |           |           |         |   |      |   |
|------------|-----------|-----------|--------------|----------|-----------|-----------|---------|---|------|---|
| LR699157.1 | 112789869 | 112790793 | locus40568.1 | 763 +    | 112789869 | 112790793 | 0,0,255 | 1 | 924  | 0 |
| LR699157.1 | 112866282 | 112867206 | locus40569.1 | 762.96 + | 112866282 | 112867206 | 0,0,255 | 1 | 924  | 0 |
| LR699157.1 | 112939465 | 112940389 | locus40570.1 | 761.44 + | 112939465 | 112940389 | 0,0,255 | 1 | 924  | 0 |
| LR699157.1 | 113004018 | 113004912 | locus40571.1 | 745.7 +  | 113004018 | 113004912 | 0,0,255 | 1 | 894  | 0 |
| LR699157.1 | 113055734 | 113056658 | locus40572.1 | 764.18 + | 113055734 | 113056658 | 0,0,255 | 1 | 924  | 0 |
| LR699157.1 | 113132402 | 113133326 | locus40573.1 | 761.45 + | 113132402 | 113133326 | 0,0,255 | 1 | 924  | 0 |
| LR699157.1 | 113195399 | 113196323 | locus40574.1 | 761.14 + | 113195399 | 113196323 | 0,0,255 | 1 | 924  | 0 |
| LR699157.1 | 113280057 | 113280981 | locus40578.1 | 763.58 - | 113280057 | 113280981 | 0,0,255 | 1 | 924  | 0 |
| LR699157.1 | 113328484 | 113329408 | locus40579.1 | 765.33 - | 113328484 | 113329408 | 0,0,255 | 1 | 924  | 0 |
| LR699157.1 | 113385393 | 113386317 | locus40580.1 | 762.44 - | 113385393 | 113386317 | 0,0,255 | 1 | 924  | 0 |
| LR699157.1 | 113451104 | 113452028 | locus40581.1 | 762.59 - | 113451104 | 113452028 | 0,0,255 | 1 | 924  | 0 |
| LR699157.1 | 113526897 | 113527821 | locus40582.1 | 760.9 -  | 113526897 | 113527821 | 0,0,255 | 1 | 924  | 0 |
| LR699157.1 | 113612402 | 113613326 | locus40584.1 | 765.6 -  | 113612402 | 113613326 | 0,0,255 | 1 | 924  | 0 |
| LR699157.1 | 113658588 | 113659512 | locus40585.1 | 763.7 -  | 113658588 | 113659512 | 0,0,255 | 1 | 924  | 0 |
| LR699157.1 | 113720965 | 113721859 | locus40586.1 | 738.53 - | 113720965 | 113721859 | 0,0,255 | 1 | 894  | 0 |
| LR699161.1 | 15068330  | 15069230  | locus44250.1 | 728.91 + | 15068330  | 15069230  | 0,0,255 | 1 | 900  | 0 |
| LR699161.1 | 15109005  | 15109938  | locus44251.1 | 756.91 + | 15109005  | 15109938  | 0,0,255 | 1 | 933  | 0 |
| LR699161.1 | 15137860  | 15138913  | locus44252.1 | 848.06 - | 15137860  | 15138913  | 0,0,255 | 1 | 1053 | 0 |
| LR699161.1 | 15159019  | 15159952  | locus44253.1 | 757.76 - | 15159019  | 15159952  | 0,0,255 | 1 | 933  | 0 |
| LR699161.1 | 15580906  | 15581815  | locus44258.1 | 737.06 + | 15580906  | 15581815  | 0,0,255 | 1 | 909  | 0 |
| LR699161.1 | 15686262  | 15687195  | locus44261.1 | 759.51 + | 15686262  | 15687195  | 0,0,255 | 1 | 933  | 0 |
| LR699161.1 | 16326175  | 16326979  | locus44273.1 | 690.01 + | 16326175  | 16326979  | 0,0,255 | 1 | 804  | 0 |
| LR699161.1 | 17752896  | 17753814  | locus44290.1 | 741.03 - | 17752896  | 17753814  | 0,0,255 | 1 | 918  | 0 |
| LR699161.1 | 18086294  | 18087188  | locus44297.1 | 723.51 + | 18086294  | 18087188  | 0,0,255 | 1 | 894  | 0 |

|            |          |          |              |          |          |          |         |   |      |   |
|------------|----------|----------|--------------|----------|----------|----------|---------|---|------|---|
| LR699161.1 | 18177544 | 18178450 | locus44300.1 | 730.75 + | 18177544 | 18178450 | 0,0,255 | 1 | 906  | 0 |
| LR699161.1 | 23691778 | 23692696 | locus44364.1 | 753 -    | 23691778 | 23692696 | 0,0,255 | 1 | 918  | 0 |
| LR699161.1 | 23722581 | 23723517 | locus44365.1 | 785.11 - | 23722581 | 23723517 | 0,0,255 | 1 | 936  | 0 |
| LR699161.1 | 28638713 | 28639643 | locus44437.1 | 752.52 + | 28638713 | 28639643 | 0,0,255 | 1 | 930  | 0 |
| LR699161.1 | 28670387 | 28671317 | locus44439.1 | 751.92 + | 28670387 | 28671317 | 0,0,255 | 1 | 930  | 0 |
| LR699161.1 | 28690143 | 28691070 | locus44440.1 | 749.12 + | 28690143 | 28691070 | 0,0,255 | 1 | 927  | 0 |
| LR699161.1 | 28718812 | 28719694 | locus44442.1 | 733.44 + | 28718812 | 28719694 | 0,0,255 | 1 | 882  | 0 |
| LR699161.1 | 28742883 | 28743810 | locus44444.1 | 751.51 + | 28742883 | 28743810 | 0,0,255 | 1 | 927  | 0 |
| LR699161.1 | 28961223 | 28962156 | locus44450.1 | 757.22 + | 28961223 | 28962156 | 0,0,255 | 1 | 933  | 0 |
| LR699161.1 | 28973488 | 28974391 | locus44451.1 | 732.7 -  | 28973488 | 28974391 | 0,0,255 | 1 | 903  | 0 |
| LR699161.1 | 28991930 | 28992833 | locus44452.1 | 733.92 - | 28991930 | 28992833 | 0,0,255 | 1 | 903  | 0 |
| LR699161.1 | 32961355 | 32962441 | locus44514.1 | 914.35 + | 32961355 | 32962441 | 0,0,255 | 1 | 1086 | 0 |

---

**Anole\_lizard**

---

|            |   |           |           |            |          |           |           |         |   |      |   |
|------------|---|-----------|-----------|------------|----------|-----------|-----------|---------|---|------|---|
|            | 2 | 193798122 | 193799079 | locus37.1  | 780.54 + | 193798122 | 193799079 | 0,0,255 | 1 | 957  | 0 |
|            | 3 | 15721862  | 15722747  | locus40.1  | 705.1 -  | 15721862  | 15722747  | 0,0,255 | 1 | 885  | 0 |
| GL343220.1 |   | 94617     | 95520     | locus96.1  | 733.75 - | 94617     | 95520     | 0,0,255 | 1 | 903  | 0 |
| GL343220.1 |   | 113516    | 114419    | locus97.1  | 731.68 - | 113516    | 114419    | 0,0,255 | 1 | 903  | 0 |
| GL343220.1 |   | 128250    | 129024    | locus98.1  | 710.76 - | 128250    | 129024    | 0,0,255 | 1 | 774  | 0 |
| GL343220.1 |   | 149925    | 150825    | locus99.1  | 732.8 -  | 149925    | 150825    | 0,0,255 | 1 | 900  | 0 |
| GL343220.1 |   | 159930    | 160821    | locus100.1 | 732.7 -  | 159930    | 160821    | 0,0,255 | 1 | 891  | 0 |
| GL343220.1 |   | 174203    | 175094    | locus101.1 | 732.74 - | 174203    | 175094    | 0,0,255 | 1 | 891  | 0 |
| GL343220.1 |   | 187800    | 188691    | locus102.1 | 723.25 - | 187800    | 188691    | 0,0,255 | 1 | 891  | 0 |
| GL343220.1 |   | 200234    | 201125    | locus103.1 | 727.93 - | 200234    | 201125    | 0,0,255 | 1 | 891  | 0 |
| GL343220.1 |   | 212181    | 213111    | locus104.1 | 765.26 - | 212181    | 213111    | 0,0,255 | 1 | 930  | 0 |
| GL343220.1 |   | 226433    | 227324    | locus105.1 | 727.08 - | 226433    | 227324    | 0,0,255 | 1 | 891  | 0 |
| GL343220.1 |   | 241426    | 242326    | locus106.1 | 725.66 - | 241426    | 242326    | 0,0,255 | 1 | 900  | 0 |
| GL343220.1 |   | 254373    | 255273    | locus107.1 | 731.84 - | 254373    | 255273    | 0,0,255 | 1 | 900  | 0 |
| GL343220.1 |   | 284822    | 285722    | locus108.1 | 734.78 + | 284822    | 285722    | 0,0,255 | 1 | 900  | 0 |
| GL343220.1 |   | 299440    | 300334    | locus109.1 | 723.63 + | 299440    | 300334    | 0,0,255 | 1 | 894  | 0 |
| GL343220.1 |   | 327484    | 328570    | locus111.1 | 905.18 + | 327484    | 328570    | 0,0,255 | 1 | 1086 | 0 |
| GL343220.1 |   | 343063    | 344074    | locus112.1 | 820.88 + | 343063    | 344074    | 0,0,255 | 1 | 1011 | 0 |
| GL343220.1 |   | 355553    | 356444    | locus113.1 | 724.51 + | 355553    | 356444    | 0,0,255 | 1 | 891  | 0 |
| GL343220.1 |   | 365185    | 366106    | locus114.1 | 767.85 + | 365185    | 366106    | 0,0,255 | 1 | 921  | 0 |
| GL343220.1 |   | 392927    | 393749    | locus115.1 | 646.51 + | 392927    | 393749    | 0,0,255 | 1 | 822  | 0 |
| GL343220.1 |   | 397437    | 398328    | locus117.1 | 716.61 - | 397437    | 398328    | 0,0,255 | 1 | 891  | 0 |
| GL343220.1 |   | 411614    | 412556    | locus119.1 | 762.71 - | 411614    | 412556    | 0,0,255 | 1 | 942  | 0 |

|            |         |         |            |          |         |         |         |   |      |   |
|------------|---------|---------|------------|----------|---------|---------|---------|---|------|---|
| GL343220.1 | 422000  | 422936  | locus120.1 | 772.93 - | 422000  | 422936  | 0,0,255 | 1 | 936  | 0 |
| GL343220.1 | 433763  | 434663  | locus121.1 | 728.18 - | 433763  | 434663  | 0,0,255 | 1 | 900  | 0 |
| GL343220.1 | 449524  | 450424  | locus122.1 | 727.67 - | 449524  | 450424  | 0,0,255 | 1 | 900  | 0 |
| GL343220.1 | 464902  | 465865  | locus123.1 | 761.78 - | 464902  | 465865  | 0,0,255 | 1 | 963  | 0 |
| GL343220.1 | 476931  | 477852  | locus124.1 | 737.99 - | 476931  | 477852  | 0,0,255 | 1 | 921  | 0 |
| GL343220.1 | 487819  | 488782  | locus125.1 | 773.63 - | 487819  | 488782  | 0,0,255 | 1 | 963  | 0 |
| GL343220.1 | 508308  | 509229  | locus127.1 | 747.49 + | 508308  | 509229  | 0,0,255 | 1 | 921  | 0 |
| GL343220.1 | 1575221 | 1576208 | locus129.1 | 816.65 - | 1575221 | 1576208 | 0,0,255 | 1 | 987  | 0 |
| GL343220.1 | 1587051 | 1587942 | locus130.1 | 732.62 - | 1587051 | 1587942 | 0,0,255 | 1 | 891  | 0 |
| GL343253.1 | 601063  | 601996  | locus135.1 | 758.35 + | 601063  | 601996  | 0,0,255 | 1 | 933  | 0 |
| GL343253.1 | 618252  | 619146  | locus137.1 | 730.13 + | 618252  | 619146  | 0,0,255 | 1 | 894  | 0 |
| GL343253.1 | 780204  | 781149  | locus139.1 | 778.79 + | 780204  | 781149  | 0,0,255 | 1 | 945  | 0 |
| GL343253.1 | 934580  | 935480  | locus140.1 | 735.63 + | 934580  | 935480  | 0,0,255 | 1 | 900  | 0 |
| GL343253.1 | 1098933 | 1099848 | locus141.1 | 756.56 + | 1098933 | 1099848 | 0,0,255 | 1 | 915  | 0 |
| GL343253.1 | 1137573 | 1138464 | locus142.1 | 725.15 + | 1137573 | 1138464 | 0,0,255 | 1 | 891  | 0 |
| GL343253.1 | 1475928 | 1476840 | locus143.1 | 748.49 + | 1475928 | 1476840 | 0,0,255 | 1 | 912  | 0 |
| GL343253.1 | 1494215 | 1495115 | locus144.1 | 740.4 +  | 1494215 | 1495115 | 0,0,255 | 1 | 900  | 0 |
| GL343253.1 | 1899873 | 1900782 | locus145.1 | 744.49 - | 1899873 | 1900782 | 0,0,255 | 1 | 909  | 0 |
| GL343253.1 | 1917521 | 1918412 | locus146.1 | 730.88 - | 1917521 | 1918412 | 0,0,255 | 1 | 891  | 0 |
| GL343253.1 | 1931433 | 1932225 | locus147.1 | 645.86 - | 1931433 | 1932225 | 0,0,255 | 1 | 792  | 0 |
| GL343253.1 | 1959004 | 1960042 | locus148.1 | 846.78 + | 1959004 | 1960042 | 0,0,255 | 1 | 1038 | 0 |
| GL343253.1 | 1963640 | 1964537 | locus149.1 | 740.71 - | 1963640 | 1964537 | 0,0,255 | 1 | 897  | 0 |
| GL343253.1 | 1975044 | 1975962 | locus150.1 | 750.76 - | 1975044 | 1975962 | 0,0,255 | 1 | 918  | 0 |
| GL343253.1 | 1989115 | 1990021 | locus152.1 | 747.43 - | 1989115 | 1990021 | 0,0,255 | 1 | 906  | 0 |

|            |         |         |            |          |         |         |         |   |     |   |
|------------|---------|---------|------------|----------|---------|---------|---------|---|-----|---|
| GL343287.1 | 1752846 | 1753809 | locus155.1 | 773.89 + | 1752846 | 1753809 | 0,0,255 | 1 | 963 | 0 |
| GL343438.1 | 218253  | 219153  | locus175.1 | 728.6 +  | 218253  | 219153  | 0,0,255 | 1 | 900 | 0 |
| GL343491.1 | 140613  | 141510  | locus177.1 | 737.45 + | 140613  | 141510  | 0,0,255 | 1 | 897 | 0 |
| GL343491.1 | 153746  | 154643  | locus178.1 | 738.26 + | 153746  | 154643  | 0,0,255 | 1 | 897 | 0 |
| GL343491.1 | 165893  | 166793  | locus179.1 | 740.81 + | 165893  | 166793  | 0,0,255 | 1 | 900 | 0 |
| GL343491.1 | 172830  | 173730  | locus180.1 | 722.27 - | 172830  | 173730  | 0,0,255 | 1 | 900 | 0 |
| GL343491.1 | 214856  | 215756  | locus181.1 | 728.35 - | 214856  | 215756  | 0,0,255 | 1 | 900 | 0 |
| GL343491.1 | 226456  | 227356  | locus182.1 | 728.9 -  | 226456  | 227356  | 0,0,255 | 1 | 900 | 0 |
| GL343514.1 | 253785  | 254691  | locus186.1 | 747.63 + | 253785  | 254691  | 0,0,255 | 1 | 906 | 0 |
| GL343514.1 | 268411  | 269341  | locus187.1 | 759.26 + | 268411  | 269341  | 0,0,255 | 1 | 930 | 0 |
| GL343514.1 | 281254  | 282160  | locus188.1 | 740.5 +  | 281254  | 282160  | 0,0,255 | 1 | 906 | 0 |
| GL343514.1 | 304686  | 305592  | locus190.1 | 740.14 + | 304686  | 305592  | 0,0,255 | 1 | 906 | 0 |
| GL343520.1 | 399815  | 400715  | locus183.1 | 718.66 - | 399815  | 400715  | 0,0,255 | 1 | 900 | 0 |
| GL343520.1 | 434981  | 435863  | locus184.1 | 707.47 - | 434981  | 435863  | 0,0,255 | 1 | 882 | 0 |
| GL344165.1 | 51383   | 52262   | locus203.1 | 716.55 - | 51383   | 52262   | 0,0,255 | 1 | 879 | 0 |
| AAWZ020352 | 30170   | 31106   | locus204.1 | 761.36 - | 30170   | 31106   | 0,0,255 | 1 | 936 | 0 |
| AAWZ020387 | 59      | 779     | locus211.1 | 580.84 + | 59      | 779     | 0,0,255 | 1 | 720 | 0 |

---

**Mouse**

---

|            |           |           |           |          |           |           |         |   |      |   |
|------------|-----------|-----------|-----------|----------|-----------|-----------|---------|---|------|---|
| CM000995.2 | 182000184 | 182001087 | locus17.1 | 743.69 + | 182000184 | 182001087 | 0,0,255 | 1 | 903  | 0 |
| CM000996.2 | 64104486  | 64105458  | locus22.1 | 785.51 + | 64104486  | 64105458  | 0,0,255 | 1 | 972  | 0 |
| CM000996.2 | 64116431  | 64117403  | locus23.1 | 785.52 - | 64116431  | 64117403  | 0,0,255 | 1 | 972  | 0 |
| CM000996.2 | 64258960  | 64260181  | locus26.1 | 1001.5 - | 64258960  | 64260181  | 0,0,255 | 1 | 1221 | 0 |
| CM000996.2 | 64339564  | 64340671  | locus28.1 | 901.25 - | 64339564  | 64340671  | 0,0,255 | 1 | 1107 | 0 |
| CM000996.2 | 64490820  | 64491849  | locus33.1 | 831.03 - | 64490820  | 64491849  | 0,0,255 | 1 | 1029 | 0 |
| CM000996.2 | 64537560  | 64538532  | locus35.1 | 791.09 - | 64537560  | 64538532  | 0,0,255 | 1 | 972  | 0 |
| CM000996.2 | 64690659  | 64691631  | locus41.1 | 791.08 - | 64690659  | 64691631  | 0,0,255 | 1 | 972  | 0 |
| CM000997.2 | 156338145 | 156339060 | locus63.1 | 745.28 + | 156338145 | 156339060 | 0,0,255 | 1 | 915  | 0 |
| CM000998.2 | 108797192 | 108798125 | locus74.1 | 765.89 - | 108797192 | 108798125 | 0,0,255 | 1 | 933  | 0 |
| CM000998.2 | 108842946 | 108843849 | locus75.1 | 733.96 - | 108842946 | 108843849 | 0,0,255 | 1 | 903  | 0 |
| CM000998.2 | 108995538 | 108996441 | locus77.1 | 739.25 - | 108995538 | 108996441 | 0,0,255 | 1 | 903  | 0 |
| CM000998.2 | 109046872 | 109047775 | locus78.1 | 742.9 -  | 109046872 | 109047775 | 0,0,255 | 1 | 903  | 0 |
| CM000998.2 | 109085848 | 109086706 | locus79.1 | 700.55 - | 109085848 | 109086706 | 0,0,255 | 1 | 858  | 0 |
| CM000998.2 | 109156067 | 109156922 | locus80.1 | 694.16 - | 109156067 | 109156922 | 0,0,255 | 1 | 855  | 0 |
| CM000998.2 | 109215501 | 109216404 | locus82.1 | 737.9 -  | 109215501 | 109216404 | 0,0,255 | 1 | 903  | 0 |
| CM000998.2 | 109286268 | 109287171 | locus83.1 | 735.87 - | 109286268 | 109287171 | 0,0,255 | 1 | 903  | 0 |
| CM000998.2 | 109363578 | 109364481 | locus85.1 | 738.41 + | 109363578 | 109364481 | 0,0,255 | 1 | 903  | 0 |
| CM000998.2 | 109452484 | 109453387 | locus86.1 | 739.61 + | 109452484 | 109453387 | 0,0,255 | 1 | 903  | 0 |
| CM000998.2 | 109566217 | 109567102 | locus87.1 | 732.64 - | 109566217 | 109567102 | 0,0,255 | 1 | 885  | 0 |
| CM000998.2 | 138532199 | 138533006 | locus90.1 | 667.82 + | 138532199 | 138533006 | 0,0,255 | 1 | 807  | 0 |
| CM000998.2 | 151513132 | 151514023 | locus92.1 | 724.66 - | 151513132 | 151514023 | 0,0,255 | 1 | 891  | 0 |
| CM000998.2 | 151561660 | 151562464 | locus93.1 | 646.37 - | 151561660 | 151562464 | 0,0,255 | 1 | 804  | 0 |

|            |           |           |            |          |           |           |         |   |     |   |
|------------|-----------|-----------|------------|----------|-----------|-----------|---------|---|-----|---|
| CM000999.2 | 123335559 | 123336537 | locus105.1 | 802.7 +  | 123335559 | 123336537 | 0,0,255 | 1 | 978 | 0 |
| CM000999.2 | 123385261 | 123386152 | locus106.1 | 725.55 - | 123385261 | 123386152 | 0,0,255 | 1 | 891 | 0 |
| CM000999.2 | 123492507 | 123493398 | locus108.1 | 727.02 - | 123492507 | 123493398 | 0,0,255 | 1 | 891 | 0 |
| CM000999.2 | 123609757 | 123610648 | locus110.1 | 727.02 - | 123609757 | 123610648 | 0,0,255 | 1 | 891 | 0 |
| CM000999.2 | 123741348 | 123742239 | locus111.1 | 733.71 + | 123741348 | 123742239 | 0,0,255 | 1 | 891 | 0 |
| CM000999.2 | 123815389 | 123816280 | locus112.1 | 728 +    | 123815389 | 123816280 | 0,0,255 | 1 | 891 | 0 |
| CM000999.2 | 123822813 | 123823704 | locus113.1 | 726.23 - | 123822813 | 123823704 | 0,0,255 | 1 | 891 | 0 |
| CM000999.2 | 124061144 | 124062035 | locus114.1 | 725.35 + | 124061144 | 124062035 | 0,0,255 | 1 | 891 | 0 |
| CM000999.2 | 124081695 | 124082586 | locus115.1 | 724.68 - | 124081695 | 124082586 | 0,0,255 | 1 | 891 | 0 |
| CM000999.2 | 124138730 | 124139621 | locus116.1 | 721.54 - | 124138730 | 124139621 | 0,0,255 | 1 | 891 | 0 |
| CM000999.2 | 124191595 | 124192498 | locus117.1 | 734.08 - | 124191595 | 124192498 | 0,0,255 | 1 | 903 | 0 |
| CM001000.2 | 5480640   | 5481543   | locus120.1 | 748.14 - | 5480640   | 5481543   | 0,0,255 | 1 | 903 | 0 |
| CM001000.2 | 7231326   | 7232229   | locus122.1 | 745.26 - | 7231326   | 7232229   | 0,0,255 | 1 | 903 | 0 |
| CM001000.2 | 7312273   | 7313176   | locus124.1 | 747.85 - | 7312273   | 7313176   | 0,0,255 | 1 | 903 | 0 |
| CM001000.2 | 7383984   | 7384914   | locus126.1 | 766.13 - | 7383984   | 7384914   | 0,0,255 | 1 | 930 | 0 |
| CM001000.2 | 7417669   | 7418572   | locus128.1 | 748.98 - | 7417669   | 7418572   | 0,0,255 | 1 | 903 | 0 |
| CM001000.2 | 7463968   | 7464871   | locus130.1 | 746.14 - | 7463968   | 7464871   | 0,0,255 | 1 | 903 | 0 |
| CM001000.2 | 7550966   | 7551896   | locus133.1 | 765.78 - | 7550966   | 7551896   | 0,0,255 | 1 | 930 | 0 |
| CM001000.2 | 7642128   | 7643058   | locus134.1 | 760.59 - | 7642128   | 7643058   | 0,0,255 | 1 | 930 | 0 |
| CM001000.2 | 7671828   | 7672731   | locus136.1 | 745.58 - | 7671828   | 7672731   | 0,0,255 | 1 | 903 | 0 |
| CM001000.2 | 7786150   | 7787080   | locus140.1 | 764.66 - | 7786150   | 7787080   | 0,0,255 | 1 | 930 | 0 |
| CM001000.2 | 7876652   | 7877555   | locus143.1 | 747.96 - | 7876652   | 7877555   | 0,0,255 | 1 | 903 | 0 |
| CM001000.2 | 7948287   | 7949217   | locus145.1 | 767.19 - | 7948287   | 7949217   | 0,0,255 | 1 | 930 | 0 |
| CM001000.2 | 8102367   | 8103297   | locus150.1 | 763.48 - | 8102367   | 8103297   | 0,0,255 | 1 | 930 | 0 |



|            |         |                    |          |         |         |         |   |     |   |
|------------|---------|--------------------|----------|---------|---------|---------|---|-----|---|
| CM001000.2 | 8137904 | 8138807 locus151.1 | 748.69 - | 8137904 | 8138807 | 0,0,255 | 1 | 903 | 0 |
| CM001000.2 | 8184212 | 8185115 locus153.1 | 745.53 - | 8184212 | 8185115 | 0,0,255 | 1 | 903 | 0 |
| CM001000.2 | 8244624 | 8245554 locus155.1 | 765.17 - | 8244624 | 8245554 | 0,0,255 | 1 | 930 | 0 |
| CM001000.2 | 8304225 | 8305155 locus157.1 | 764.59 - | 8304225 | 8305155 | 0,0,255 | 1 | 930 | 0 |
| CM001000.2 | 8367459 | 8368389 locus159.1 | 766.43 - | 8367459 | 8368389 | 0,0,255 | 1 | 930 | 0 |
| CM001000.2 | 8399201 | 8400104 locus161.1 | 748.72 - | 8399201 | 8400104 | 0,0,255 | 1 | 903 | 0 |
| CM001000.2 | 8471468 | 8472371 locus163.1 | 746.79 - | 8471468 | 8472371 | 0,0,255 | 1 | 903 | 0 |
| CM001000.2 | 8667317 | 8668220 locus170.1 | 746.95 - | 8667317 | 8668220 | 0,0,255 | 1 | 903 | 0 |
| CM001000.2 | 8738845 | 8739775 locus172.1 | 766.83 - | 8738845 | 8739775 | 0,0,255 | 1 | 930 | 0 |
| CM001000.2 | 8801137 | 8802040 locus174.1 | 749.47 - | 8801137 | 8802040 | 0,0,255 | 1 | 903 | 0 |
| CM001000.2 | 8872179 | 8873109 locus176.1 | 763.4 -  | 8872179 | 8873109 | 0,0,255 | 1 | 930 | 0 |
| CM001000.2 | 8907733 | 8908636 locus177.1 | 748.76 - | 8907733 | 8908636 | 0,0,255 | 1 | 903 | 0 |
| CM001000.2 | 9014749 | 9015679 locus181.1 | 763.75 - | 9014749 | 9015679 | 0,0,255 | 1 | 930 | 0 |
| CM001000.2 | 9074795 | 9075725 locus183.1 | 765.18 - | 9074795 | 9075725 | 0,0,255 | 1 | 930 | 0 |
| CM001000.2 | 9176901 | 9177831 locus185.1 | 765.75 - | 9176901 | 9177831 | 0,0,255 | 1 | 930 | 0 |
| CM001000.2 | 9206102 | 9207005 locus187.1 | 747.24 - | 9206102 | 9207005 | 0,0,255 | 1 | 903 | 0 |
| CM001000.2 | 9326023 | 9326953 locus191.1 | 764.63 - | 9326023 | 9326953 | 0,0,255 | 1 | 930 | 0 |
| CM001000.2 | 9373547 | 9374450 locus192.1 | 747.54 - | 9373547 | 9374450 | 0,0,255 | 1 | 903 | 0 |
| CM001000.2 | 9547710 | 9548613 locus198.1 | 749.47 - | 9547710 | 9548613 | 0,0,255 | 1 | 903 | 0 |
| CM001000.2 | 9642620 | 9643523 locus200.1 | 747.54 - | 9642620 | 9643523 | 0,0,255 | 1 | 903 | 0 |
| CM001000.2 | 9816781 | 9817684 locus206.1 | 749.47 - | 9816781 | 9817684 | 0,0,255 | 1 | 903 | 0 |
| CM001000.2 | 9886277 | 9887207 locus208.1 | 764.31 - | 9886277 | 9887207 | 0,0,255 | 1 | 930 | 0 |
| CM001000.2 | 9927623 | 9928526 locus210.1 | 749.43 - | 9927623 | 9928526 | 0,0,255 | 1 | 903 | 0 |
| CM001000.2 | 9976244 | 9977147 locus212.1 | 746.8 -  | 9976244 | 9977147 | 0,0,255 | 1 | 903 | 0 |

|            |          |          |            |          |          |          |         |   |      |   |
|------------|----------|----------|------------|----------|----------|----------|---------|---|------|---|
| CM001000.2 | 10037234 | 10038164 | locus214.1 | 764.73 - | 10037234 | 10038164 | 0,0,255 | 1 | 930  | 0 |
| CM001000.2 | 10087197 | 10088100 | locus216.1 | 748.3 -  | 10087197 | 10088100 | 0,0,255 | 1 | 903  | 0 |
| CM001000.2 | 10158651 | 10159554 | locus218.1 | 753.88 - | 10158651 | 10159554 | 0,0,255 | 1 | 903  | 0 |
| CM001000.2 | 12581469 | 12582444 | locus220.1 | 788.01 - | 12581469 | 12582444 | 0,0,255 | 1 | 975  | 0 |
| CM001000.2 | 12615232 | 12616207 | locus221.1 | 791.23 - | 12615232 | 12616207 | 0,0,255 | 1 | 975  | 0 |
| CM001000.2 | 12651705 | 12652608 | locus222.1 | 733.6 -  | 12651705 | 12652608 | 0,0,255 | 1 | 903  | 0 |
| CM001000.2 | 12693997 | 12694900 | locus223.1 | 732.95 - | 12693997 | 12694900 | 0,0,255 | 1 | 903  | 0 |
| CM001000.2 | 41399731 | 41400661 | locus224.1 | 759.8 -  | 41399731 | 41400661 | 0,0,255 | 1 | 930  | 0 |
| CM001000.2 | 41719004 | 41719919 | locus227.1 | 742.04 + | 41719004 | 41719919 | 0,0,255 | 1 | 915  | 0 |
| CM001000.2 | 41744712 | 41745639 | locus229.1 | 757.77 - | 41744712 | 41745639 | 0,0,255 | 1 | 927  | 0 |
| CM001000.2 | 41836880 | 41837807 | locus231.1 | 757.92 - | 41836880 | 41837807 | 0,0,255 | 1 | 927  | 0 |
| CM001000.2 | 41937526 | 41938462 | locus232.1 | 765.04 - | 41937526 | 41938462 | 0,0,255 | 1 | 936  | 0 |
| CM001000.2 | 42011791 | 42012727 | locus234.1 | 758.49 - | 42011791 | 42012727 | 0,0,255 | 1 | 936  | 0 |
| CM001000.2 | 42194876 | 42195776 | locus237.1 | 732.81 + | 42194876 | 42195776 | 0,0,255 | 1 | 900  | 0 |
| CM001000.2 | 42299924 | 42300755 | locus239.1 | 695.34 + | 42299924 | 42300755 | 0,0,255 | 1 | 831  | 0 |
| CM001000.2 | 42429782 | 42430718 | locus243.1 | 762.82 - | 42429782 | 42430718 | 0,0,255 | 1 | 936  | 0 |
| CM001000.2 | 42764437 | 42765355 | locus244.1 | 747.33 - | 42764437 | 42765355 | 0,0,255 | 1 | 918  | 0 |
| CM001000.2 | 42903250 | 42904168 | locus246.1 | 747.55 - | 42903250 | 42904168 | 0,0,255 | 1 | 918  | 0 |
| CM001000.2 | 43047188 | 43048106 | locus248.1 | 746.62 + | 43047188 | 43048106 | 0,0,255 | 1 | 918  | 0 |
| CM001000.2 | 84940168 | 84941215 | locus254.1 | 852.34 - | 84940168 | 84941215 | 0,0,255 | 1 | 1047 | 0 |
| CM001000.2 | 84994644 | 84995562 | locus255.1 | 750.26 - | 84994644 | 84995562 | 0,0,255 | 1 | 918  | 0 |
| CM001000.2 | 85136239 | 85137202 | locus261.1 | 787.5 -  | 85136239 | 85137202 | 0,0,255 | 1 | 963  | 0 |
| CM001000.2 | 85221517 | 85222480 | locus264.1 | 791.86 - | 85221517 | 85222480 | 0,0,255 | 1 | 963  | 0 |
| CM001000.2 | 85406375 | 85407290 | locus268.1 | 751.81 - | 85406375 | 85407290 | 0,0,255 | 1 | 915  | 0 |

|            |           |           |            |          |           |           |         |   |     |   |
|------------|-----------|-----------|------------|----------|-----------|-----------|---------|---|-----|---|
| CM001000.2 | 85558702  | 85559620  | locus271.1 | 748.5 -  | 85558702  | 85559620  | 0,0,255 | 1 | 918 | 0 |
| CM001000.2 | 85623629  | 85624547  | locus276.1 | 760.34 + | 85623629  | 85624547  | 0,0,255 | 1 | 918 | 0 |
| CM001000.2 | 85737783  | 85738746  | locus280.1 | 793.66 - | 85737783  | 85738746  | 0,0,255 | 1 | 963 | 0 |
| CM001000.2 | 85857546  | 85858461  | locus286.1 | 751.9 -  | 85857546  | 85858461  | 0,0,255 | 1 | 915 | 0 |
| CM001000.2 | 85951866  | 85952781  | locus289.1 | 753.33 - | 85951866  | 85952781  | 0,0,255 | 1 | 915 | 0 |
| CM001000.2 | 86148041  | 86148965  | locus298.1 | 760.91 - | 86148041  | 86148965  | 0,0,255 | 1 | 924 | 0 |
| CM001000.2 | 86225205  | 86226111  | locus302.1 | 752.48 - | 86225205  | 86226111  | 0,0,255 | 1 | 906 | 0 |
| CM001000.2 | 86811114  | 86812032  | locus305.1 | 757.2 +  | 86811114  | 86812032  | 0,0,255 | 1 | 918 | 0 |
| CM001000.2 | 86884870  | 86885788  | locus307.1 | 755.19 + | 86884870  | 86885788  | 0,0,255 | 1 | 918 | 0 |
| CM001000.2 | 86954253  | 86955177  | locus309.1 | 761.59 + | 86954253  | 86955177  | 0,0,255 | 1 | 924 | 0 |
| CM001000.2 | 87037050  | 87037968  | locus311.1 | 760.7 +  | 87037050  | 87037968  | 0,0,255 | 1 | 918 | 0 |
| CM001001.2 | 3139124   | 3140009   | locus317.1 | 721.15 + | 3139124   | 3140009   | 0,0,255 | 1 | 885 | 0 |
| CM001002.2 | 124428075 | 124429008 | locus338.1 | 763.2 -  | 124428075 | 124429008 | 0,0,255 | 1 | 933 | 0 |
| CM001003.2 | 79193979  | 79194933  | locus345.1 | 788.47 + | 79193979  | 79194933  | 0,0,255 | 1 | 954 | 0 |
| CM001003.2 | 79292956  | 79293874  | locus346.1 | 762.26 + | 79292956  | 79293874  | 0,0,255 | 1 | 918 | 0 |
| CM001003.2 | 79395839  | 79396766  | locus347.1 | 763.21 + | 79395839  | 79396766  | 0,0,255 | 1 | 927 | 0 |
| CM001003.2 | 79491347  | 79492154  | locus348.1 | 656.54 + | 79491347  | 79492154  | 0,0,255 | 1 | 807 | 0 |
| CM001003.2 | 130385799 | 130386705 | locus351.1 | 743.8 -  | 130385799 | 130386705 | 0,0,255 | 1 | 906 | 0 |
| CM001003.2 | 130418260 | 130419166 | locus352.1 | 744.36 - | 130418260 | 130419166 | 0,0,255 | 1 | 906 | 0 |
| CM001003.2 | 130446198 | 130447098 | locus353.1 | 736.22 - | 130446198 | 130447098 | 0,0,255 | 1 | 900 | 0 |
| CM001003.2 | 130471820 | 130472720 | locus354.1 | 733.27 - | 130471820 | 130472720 | 0,0,255 | 1 | 900 | 0 |
| CM001007.2 | 51417979  | 51418882  | locus389.1 | 735.54 + | 51417979  | 51418882  | 0,0,255 | 1 | 903 | 0 |
| CM001007.2 | 51460056  | 51460854  | locus391.1 | 695.29 + | 51460056  | 51460854  | 0,0,255 | 1 | 798 | 0 |
| CM001010.2 | 17733237  | 17734167  | locus403.1 | 758.77 + | 17733237  | 17734167  | 0,0,255 | 1 | 930 | 0 |

|            |          |          |            |          |          |          |         |   |     |   |
|------------|----------|----------|------------|----------|----------|----------|---------|---|-----|---|
| CM001010.2 | 18184353 | 18185178 | locus409.1 | 699.47 + | 18184353 | 18185178 | 0,0,255 | 1 | 825 | 0 |
| CM001010.2 | 18243569 | 18244394 | locus410.1 | 769.85 - | 18243569 | 18244394 | 0,0,255 | 1 | 825 | 0 |
| CM001010.2 | 18325619 | 18326441 | locus413.1 | 767.65 + | 18325619 | 18326441 | 0,0,255 | 1 | 822 | 0 |
| CM001010.2 | 18451538 | 18452324 | locus415.1 | 733.92 + | 18451538 | 18452324 | 0,0,255 | 1 | 786 | 0 |
| CM001010.2 | 18597338 | 18598157 | locus419.1 | 760.9 +  | 18597338 | 18598157 | 0,0,255 | 1 | 819 | 0 |
| CM001010.2 | 18706327 | 18707149 | locus421.1 | 767.12 + | 18706327 | 18707149 | 0,0,255 | 1 | 822 | 0 |
| CM001010.2 | 18947249 | 18948071 | locus426.1 | 720.52 + | 18947249 | 18948071 | 0,0,255 | 1 | 822 | 0 |
| CM001010.2 | 19080489 | 19081311 | locus430.1 | 722.02 + | 19080489 | 19081311 | 0,0,255 | 1 | 822 | 0 |
| CM001010.2 | 19175935 | 19176751 | locus432.1 | 692.39 + | 19175935 | 19176751 | 0,0,255 | 1 | 816 | 0 |
| CM001010.2 | 19303725 | 19304643 | locus434.1 | 752.41 + | 19303725 | 19304643 | 0,0,255 | 1 | 918 | 0 |
| CM001010.2 | 19393768 | 19394590 | locus436.1 | 762.84 + | 19393768 | 19394590 | 0,0,255 | 1 | 822 | 0 |
| CM001010.2 | 19531211 | 19532060 | locus440.1 | 681.07 + | 19531211 | 19532060 | 0,0,255 | 1 | 849 | 0 |
| CM001010.2 | 19811540 | 19812536 | locus448.1 | 827.96 + | 19811540 | 19812536 | 0,0,255 | 1 | 996 | 0 |
| CM001010.2 | 19986867 | 19987782 | locus452.1 | 749.56 - | 19986867 | 19987782 | 0,0,255 | 1 | 915 | 0 |
| CM001010.2 | 20029424 | 20030246 | locus453.1 | 699.09 - | 20029424 | 20030246 | 0,0,255 | 1 | 822 | 0 |
| CM001010.2 | 20208229 | 20209144 | locus456.1 | 757.96 - | 20208229 | 20209144 | 0,0,255 | 1 | 915 | 0 |
| CM001010.2 | 20267546 | 20268545 | locus458.1 | 838.63 - | 20267546 | 20268545 | 0,0,255 | 1 | 999 | 0 |
| CM001010.2 | 20374938 | 20375772 | locus462.1 | 677.49 + | 20374938 | 20375772 | 0,0,255 | 1 | 834 | 0 |
| CM001010.2 | 20540516 | 20541434 | locus465.1 | 754.13 - | 20540516 | 20541434 | 0,0,255 | 1 | 918 | 0 |
| CM001010.2 | 20573828 | 20574746 | locus467.1 | 758.67 - | 20573828 | 20574746 | 0,0,255 | 1 | 918 | 0 |
| CM001010.2 | 22547940 | 22548753 | locus469.1 | 659.26 - | 22547940 | 22548753 | 0,0,255 | 1 | 813 | 0 |
| CM001010.2 | 22618320 | 22619133 | locus472.1 | 658.26 + | 22618320 | 22619133 | 0,0,255 | 1 | 813 | 0 |
| CM001010.2 | 22958001 | 22958814 | locus474.1 | 657.06 + | 22958001 | 22958814 | 0,0,255 | 1 | 813 | 0 |
| CM001010.2 | 23076612 | 23077425 | locus476.1 | 656.3 +  | 23076612 | 23077425 | 0,0,255 | 1 | 813 | 0 |

|            |           |           |            |          |           |           |         |   |     |   |
|------------|-----------|-----------|------------|----------|-----------|-----------|---------|---|-----|---|
| CM001010.2 | 23149863  | 23150676  | locus477.1 | 652.21 + | 23149863  | 23150676  | 0,0,255 | 1 | 813 | 0 |
| CM001010.2 | 23290933  | 23291842  | locus481.1 | 733.58 - | 23290933  | 23291842  | 0,0,255 | 1 | 909 | 0 |
| CM001010.2 | 23359219  | 23360128  | locus484.1 | 731.67 + | 23359219  | 23360128  | 0,0,255 | 1 | 909 | 0 |
| CM001010.2 | 23400955  | 23401864  | locus486.1 | 736.73 + | 23400955  | 23401864  | 0,0,255 | 1 | 909 | 0 |
| CM001010.2 | 23441010  | 23441823  | locus487.1 | 673.2 -  | 23441010  | 23441823  | 0,0,255 | 1 | 813 | 0 |
| CM001010.2 | 23459674  | 23460487  | locus489.1 | 699.6 -  | 23459674  | 23460487  | 0,0,255 | 1 | 813 | 0 |
| CM001010.2 | 55592340  | 55593123  | locus493.1 | 736.42 - | 55592340  | 55593123  | 0,0,255 | 1 | 783 | 0 |
| CM001010.2 | 57508782  | 57509715  | locus494.1 | 771.92 - | 57508782  | 57509715  | 0,0,255 | 1 | 933 | 0 |
| CM001013.2 | 124127777 | 124128680 | locus508.1 | 734.21 - | 124127777 | 124128680 | 0,0,255 | 1 | 903 | 0 |
| KB469738.3 | 197845    | 198778    | locus755.1 | 763.2 -  | 197845    | 198778    | 0,0,255 | 1 | 933 | 0 |
| KB469742.1 | 904911    | 905817    | locus758.1 | 83.15 -  | 904911    | 905817    | 0,0,255 | 1 | 906 | 0 |

---

**Table S2. PCR primers used to amplify four V2R genes of *Polypterus senegalus***

| Gene              | Forward                      | Reverse                    |
|-------------------|------------------------------|----------------------------|
| <i>V2R2</i>       | 5'-CCAACGTCTTCTGATTGTG-3'    | 5'-GACTCCGTGATGTTACTGCT-3' |
| <i>ancV2R</i>     | 5'-GCAAGACGAGATCAATGTG-3'    | 5'-TTGTGCTGATGTATCCTGG-3'  |
| <i>f-V2R65700</i> | 5'-TGTATGACACTGCTGAAGTGC-3'  | 5'-CTTTCCGTGCATACCGATA-3'  |
| <i>t-V2R56889</i> | 5'-GCAGGTACTGAGATTGTGTAGG-3' | 5'-CAATGCTGTCACTGACAGAC-3' |

















MEYLSFEDTTGIIISLALFGLICTLITIVIFAYRNSPIVKANNSLSFLILFSLALCFLCSVTFIQTPTWMSCLRHTVFGITFVLSISCSILGKTVVLI AFKAKLPANMMTKWFGIQQKALILICTGVQIISVWVLIAPPLPM  
NKIHKQSSRIILECNVGSVAVSLVLYGIGLSCICFLVLAFLARLKNDFNEAKITFSMLIFCAVWITFIPAYISSPGKYTVAVEIFAILSSSFGLLCIPAPKCYIILLRPEKNTKQMLMGRSS  
>Western\_c\_lawed\_frog, locus782.1

MCVPKVIIFLSYQEPGLIFLAVTVIIFLITLISLIFIMKYRGTPIKATNRELSYLLVSLCFLCCLIFIPAGSVPMTCLRQTLFMVVSISISSVLAKTIVVIAFNATKPKGSLKHYVGTQALIAIVLVIV  
SPFPQVNAEIKHLZRECHGFLYVTLGFMFLAMVFFAAFLNAGLILITSLMFLCSVWVSFIAPHLSTKGYVTSVQIFAILASSAGLACIFLPCYIILLRPPDRNSRGLTSGASR  
>Caecilian, locus36862.1

CTTCPEDQWSPNRDACPIMIFLSEYELLGIVLILISIVFFLITAVILGIFIYRDPPIVRANRNNRSLYLLISLMSFLCFLCFLVIFIGRPPKVTCLLRQTVFVITFISLSSVLAKTIVVIAFNATKPKGSLKHYVGTQALIAIVLVIV  
CSLIQTVLCLAWLFTAPPFPYLMKSEIGLITLCEGNSIVAFVYCVLGLGVLGAGVSVFAFLARLNDPDSFNEAKITFSMLGFCVSWGAFVAPYLSKSGSRMVAVEIFAILSSSAGLGCIFIPKCYIILLRPPDRNSRGLTKNLNE  
>Caecilian, locus36730.1

CITCPEDQWSPNRDACPIMIFLSEYELLGIVLILISIVFFLITAVILGIFIYRDPPIVRANRNNRSLYLLISLMSFLCFLCFLVIFIGRPPKVTCLLRQTVFVITFISLSSVLAKTIVVIAFNATKPKGSLKHYVGTQALIAIVLVIV  
CSLIQTVLCLAWLFTAPPFPYLMKSEIGLITLCEGNSIVAFVYCVLGLGVLGAGVSVFAFLARLNDPDSFNEAKITFSMLGFCVSWGAFVAPYLSKSGSRMVAVEIFAILSSSAGLGCIFIPKCYIILLRPPDRNSRGLTKNLNE  
>Western\_c\_lawed\_frog, locus689.1

CIKSEYKSNTEQDGPCKPKNINFLSYDILGATLSSITILCAVTCVAVLIGFIKYRETPIVRANRNNRSLYLLISLMSFLCFLCFLVIFIGRPTQICCLLRQTVFVITFISVSSVLAKTIVVIAFNATKPKGSLKHYVGTQALIAIVLVIV  
CSLGEIISIVMLSNPPFSETDLSDPENIILLCEGNSGFFFCIIGYIGTLALLSFAAFLAKDFPDRFNEAKITFSMLGFCVSWGAFVAPYLSKSGSRMVAVEIFAILSSSAGLGCIFIPKCYIILLRPPDRNSRGLTKNLNE  
>Western\_c\_lawed\_frog, locus638.1

CIKSEYKSNTEQDGPCKPKNINFLSYDILGATLSSITILCAVTCVAVLIGFIKYRETPIVRANRNNRSLYLLISLMSFLCFLCFLVIFIGRPTQICCLLRQTVFVITFISVSSVLAKTIVVIAFNATKPKGSLKHYVGTQALIAIVLVIV  
CSLGEIISIVMLSNPPFSETDLSDPENIILLCEGNSGFFFCIIGYIGTLALLSFAAFLAKDFPDRFNEAKITFSMLGFCVSWGAFVAPYLSKSGSRMVAVEIFAILSSSAGLGCIFIPKCYIILLRPPDRNSRGLTKNLNE  
>Western\_c\_lawed\_frog, locus582.1

CERCSEYKSNTERTECLLKAIFLSDYDITMGASLTAIAFLITFASVVLGFIKRYWETPIVRANRNNRSLYLLISLMSFLCFLCFLVIFIGRPTQICCLLRQTVFVITFISVSSVLAKTIVVIAFNATKPKGSLKHYVGTQALIAIVLVIV  
CSLGEIISIVMLSNPPFSETDLSDPENIILLCEGNSGFFFCIIGYIGTLALLSFAAFLAKDFPDRFNEAKITFSMLGFCVSWGAFVAPYLSKSGSRMVAVEIFAILSSSAGLGCIFIPKCYIILLRPPDRNSRGLTKNLNE  
>Small-eyed\_fabbitsfish, locus128.1

CLTCPLEWSDIKRKHDLKIEEFLSLEETLRVLTALLGLVCLTSVTFAYYHRDITIVKANNSDLSFLLLVALLCFLCSVTFIPEPSVMSCLRHMMAFITFVLCISCVLGTIVVIAFNATKPKGSLKHYVGTQALIAIVLVIV  
LTLIQCLICTIWLSPPPYLETISEYFTRVFECHVGSVAFAVYCVLGLGVLGAGVSVFAFLARLNDPDSFNEAKITFSMLIFCAVWITFIPAYISSPGKYTVAVEIFAILSSSAGLGCIFIPKCYIILLRPPDRNSRGLTKNLNE  
>Redfish, locus27498.1

MGIALTTLSSGTCISICVLTIFIIYRNTPIVVKANNSLSFLLLISLTLFCVCLCFIGKPSHVTCLRHVMGFSVLCISICLVKTIIVVIMAFKATLPGNNIMKWFAGAAQRGTVFFFTIQLSICIWLSTAPPFPVNSKNINTK  
IILECDIGSLTGFSCLLGYGLLACIFLAFARLNDPDTFNEARITFSMLIFCAVWITFIPAYISSPGKYTVAVEIFAILSSSAGLGCIFIPKCYIILLRPPDRNSRGLTKNLNE  
>Redfish, locus27501.1

MGIALTTLSSGTCISICVLTIFIIYRNTPIVVKANNSLSFLLLISLTLFCVCLCFIGKPSHVTCLRHVMGFSVLCISICLVKTIIVVIMAFKATLPGNNIMKWFAGAAQRGTVFFFTIQLSICIWLSTAPPFPVNSKNINTK  
IILECDIGSLTGFSCLLGYGLLACIFLAFARLNDPDTFNEARITFSMLIFCAVWITFIPAYISSPGKYTVAVEIFAILSSSAGLGCIFIPKCYIILLRPPDRNSRGLTKNLNE  
>Redfish, locus27496.1

MGIALTTLSSGTCISICVLTIFIIYRNTPIVVKANNSLSFLLLISLTLFCVCLCFIGKPSHVTCLRHVMGFSVLCISICLVKTIIVVIMAFKATLPGNNIMKWFAGAAQRGTVFFFTIQLSICIWLSTAPPFPVNSKNINTK  
IILECDIGSLTGFSCLLGYGLLACIFLAFARLNDPDTFNEARITFSMLIFCAVWITFIPAYISSPGKYTVAVEIFAILSSSAGLGCIFIPKCYIILLRPPDRNSRGLTKNLNE  
>Redfish, locus27496.1

MGIALTTLSSGTCISICVLTIFIIYRNTPIVVKANNSLSFLLLISLTLFCVCLCFIGKPSHVTCLRHVMGFSVLCISICLVKTIIVVIMAFKATLPGNNIMKWFAGAAQRGTVFFFTIQLSICIWLSTAPPFPVNSKNINTK  
IILECDIGSLTGFSCLLGYGLLACIFLAFARLNDPDTFNEARITFSMLIFCAVWITFIPAYISSPGKYTVAVEIFAILSSSAGLGCIFIPKCYIILLRPPDRNSRGLTKNLNE  
>Redfish, locus27496.1

MGIALTTLSSGTCISICVLTIFIIYRNTPIVVKANNSLSFLLLISLTLFCVCLCFIGKPSHVTCLRHVMGFSVLCISICLVKTIIVVIMAFKATLPGNNIMKWFAGAAQRGTVFFFTIQLSICIWLSTAPPFPVNSKNINTK  
IILECDIGSLTGFSCLLGYGLLACIFLAFARLNDPDTFNEARITFSMLIFCAVWITFIPAYISSPGKYTVAVEIFAILSSSAGLGCIFIPKCYIILLRPPDRNSRGLTKNLNE  
>Redfish, locus40354.1

CIKCPDDLWNSAGKNOQVCLKEIEFLSYDESMGIVLITIASLFGASISVCLLIIIFHYRNTPIVVKANNSLSFLLLISLTLFCVCLCFIGQPSDITCFMRHVMGFSVLCISICLVKTIIVVIMAFKATLPGNNIMKWFAGAAQRGTVFF  
LTFIQSMICLWLAAPPFPKNSKYLNKIILEDIGSLIAGFCTLGYGLLACIFLAFARLNDPDTFNEAKITFSMLIFCAVWITFIPAYISSPGKYTVAVEIFAILSSSAGLGCIFIPKCYIILLRPPDRNSRGLTKNLNE  
>Redfish, locus27514.1

MKEIEFLSYDESMGLTITLTTALTVGLSCLGILSIFIIHYRHTPIVVKANNSLSFLLLASLTLFCFALCFIGQPSNTSCLRHMVGFISVLCISICLVKTIIVVIMAFKATLPGNNIMKWFAGAAQRGTVFFFTIQLSICIWLSTAPP  
VPNKNTIKQSVIIFECDDVGLTGFSCLLGYGLLACIFLAFARLNDPDTFNEAKITFSMLIFCAVWITFIPAYISSPGKYTVAVEIFAILSSSAGLGCIFIPKCYIILLRPPDRNSRGLTKNLNE  
>Redfish, locus27524.1

MGITLTTALSGTCLSIGLMIIFQYRNTPIVVKANNSLSFLLLVSLTLFCVCLCFIGQPSHVTCLRHVMGFSVLCISICLVKTIIVVIMAFKATLPGNNIMKWFAGAAQRGTVFFFTIQLSICIWLSTAPPFPVNSKNINTK  
IILECDIGSLTGFSCLLGYGLLACIFLAFARLNDPDTFNEAKITFSMLIFCAVWITFIPAYISSPGKYTVAVEIFAILSSSAGLGCIFIPKCYIILLRPPDRNSRGLTKNLNE  
>Redfish, locus27417.1

CSRLCPDFNSNQGKNOQVCLKEIEFLSYDESMGIIITLTTALGTCLSVAILAIFIQYRNTPIVVKANNSLSFLLLVSLTLFCVCLCFIGQPSHVTCLRHVMGFSVLCISICLVKTIIVVIMAFKATLPGNNIMKWFAGAAQRGTVFF  
FTLIQAVICLWFCFPPGPAKNIKQNSKIILEDIGSLIAGFCTLGYGLLACIFLAFARLNDPDTFNEAKITFSMLIFCAVWITFIPAYISSPGKYTVAVEIFAILSSSAGLGCIFIPKCYIILLRPPDRNSRGLTKNLNE  
>Redfish, locus27517.1

CIQCPDQWSPNRNCCLKEVEFLSYDAMGIIITLTAALFGASFCVMAIIFIIHYRHTPIVVKANNSLSFLLLVSLTLFCVCLCFIGQPSHVTCLRHVMGFSVLCISICLVKTIIVVIMAFKATLPGNNIMKWFAGAAQRGTVFF  
LTCVQSLICTFWLTTAPPFPNTLSONAKLILECNISGIFGCLGILSIFLAFARLNDPDTFNEAKITFSMLIFCAVWITFIPAYISSPGKYTVAVEIFAILSSSAGLGCIFIPKCYIILLRPPDRNSRGLTKNLNE  
>Redfish, locus27515.1

MGITLTTALSGTCLSIGLMIIFQYRNTPIVVKANNSLSFLLLVSLTLFCVCLCFIGQPSHVTCLRHVMGFSVLCISICLVKTIIVVIMAFKATLPGNNIMKWFAGAAQRGTVFFFTIQLSICIWLSTAPPFPVNSKNINTK  
IILECDIGSLTGFSCLLGYGLLACIFLAFARLNDPDTFNEAKITFSMLIFCAVWITFIPAYISSPGKYTVAVEIFAILSSSAGLGCIFIPKCYIILLRPPDRNSRGLTKNLNE  
>Redfish, locus27510.1

CIKCTSEFPNSGRNECVLKEIEFLSYDESMGIIITLTTALSGACLSTGLVAVFIHYRNTPIVVKANNSLSFLLLVSLTLFCVCLCFIGQPSHVTCLRHVMGFSVLCISICLVKTIIVVIMAFKATLPGNNIMKWFAGAAQRGTVFF  
FTIQLSICIWLTTAPPFPKNSKYLNKIILEDIGSLIAGFCTLGYGLLACIFLAFARLNDPDTFNEAKITFSMLIFCAVWITFIPAYISSPGKYTVAVEIFAILSSSAGLGCIFIPKCYIILLRPPDRNSRGLTKNLNE  
>Redfish, locus40336.1

CIRCLPEFNSNRDSCVCLKEIEFLSYDDMGIIITLTAACFGACLSTGLVSVLFIHYRNTPIVVKANNSLSFLLLVSLTLFCVCLCFIGQPSHVTCLRHVMGFSVLCISICLVKTIIVVIMAFKATLPGNNIMKWFAGAAQRGTVFF  
LAFIQALICLWMLTTAPPFPKNIKQNSKIILEDIGSLIAGFCTLGYGLLACIFLAFARLNDPDTFNEAKITFSMLIFCAVWITFIPAYISSPGKYTVAVEIFAILSSSAGLGCIFIPKCYIILLRPPDRNSRGLTKNLNE  
>Redfish, locus40342.1

CIRCLPEFNSNRDSCVCLKEIEFLSYDDMGIIITLTAACFGACLSTGLVSVLFIHYRNTPIVVKANNSLSFLLLVSLTLFCVCLCFIGQPSHVTCLRHVMGFSVLCISICLVKTIIVVIMAFKATLPGNNIMKWFAGAAQRGTVFF  
LAFIQALICLWMLTTAPPFPKNIKQNSKIILEDIGSLIAGFCTLGYGLLACIFLAFARLNDPDTFNEAKITFSMLIFCAVWITFIPAYISSPGKYTVAVEIFAILSSSAGLGCIFIPKCYIILLRPPDRNSRGLTKNLNE  
>Redfish, locus40347.1

CIRCLTEFNSNRDSCVCLKEIEFLSYDDMGIIITLTAACFGACLSTGLVSVLFIHYRNTPIVVKANNSLSFLLLVSLTLFCVCLCFIGQPSHVTCLRHVMGFSVLCISICLVKTIIVVIMAFKATLPGNNIMKWFAGAAQRGTVFF  
LAFIQALICLWMLTTAPPFPKNIKQNSKIILEDIGSLIAGFCTLGYGLLACIFLAFARLNDPDTFNEAKITFSMLIFCAVWITFIPAYISSPGKYTVAVEIFAILSSSAGLGCIFIPKCYIILLRPPDRNSRGLTKNLNE  
>Redfish, locus27454.1

CIKCPDQWSPNRNCCVCLKEVEFLSFTVETIIGLTVSSGCVLCLSTIAVFIHYRNTSPLKANNLESLIILSLTLFCVCLCFIGQPSHVTCLRHVMGFSVLCISICLVKTIIVVIMAFKATLPGNNIMKWFAGAAQRGTVFF  
LTLFQILCIWMLTTAPPFPKNIKQNSKIILEDIGSLIAGFCTLGYGLLACIFLAFARLNDPDTFNEAKITFSMLIFCAVWITFIPAYISSPGKYTVAVEIFAILSSSAGLGCIFIPKCYIILLRPPDRNSRGLTKNLNE  
>Redfish, locus27452.1

MGITLTTALSGTCLSIGLMIIFQYRNTPIVVKANNSLSFLLLVSLTLFCVCLCFIGQPSHVTCLRHVMGFSVLCISICLVKTIIVVIMAFKATLPGNNIMKWFAGAAQRGTVFFFTIQLSICIWLSTAPPFPVNSKNINTK  
IILECDIGSLTGFSCLLGYGLLACIFLAFARLNDPDTFNEAKITFSMLIFCAVWITFIPAYISSPGKYTVAVEIFAILSSSAGLGCIFIPKCYIILLRPPDRNSRGLTKNLNE  
>Redfish, locus27461.1

MGITLTTALSGTCLSIGLMIIFQYRNTPIVVKANNSLSFLLLVSLTLFCVCLCFIGQPSHVTCLRHVMGFSVLCISICLVKTIIVVIMAFKATLPGNNIMKWFAGAAQRGTVFFFTIQLSICIWLSTAPPFPVNSKNINTK  
IILECDIGSLTGFSCLLGYGLLACIFLAFARLNDPDTFNEAKITFSMLIFCAVWITFIPAYISSPGKYTVAVEIFAILSSSAGLGCIFIPKCYIILLRPPDRNSRGLTKNLNE  
>Redfish, locus27464.1

MGITLTTALSGTCLSIGLMIIFQYRNTPIVVKANNSLSFLLLVSLTLFCVCLCFIGQPSHVTCLRHVMGFSVLCISICLVKTIIVVIMAFKATLPGNNIMKWFAGAAQRGTVFFFTIQLSICIWLSTAPPFPVNSKNINTK  
IILECDIGSLTGFSCLLGYGLLACIFLAFARLNDPDTFNEAKITFSMLIFCAVWITFIPAYISSPGKYTVAVEIFAILSSSAGLGCIFIPKCYIILLRPPDRNSRGLTKNLNE  
>Redfish, locus27456.1

MGITLTTALSGTCLSIGLMIIFQYRNTPIVVKANNSLSFLLLVSLTLFCVCLCFIGQPSHVTCLRHVMGFSVLCISICLVKTIIVVIMAFKATLPGNNIMKWFAGAAQRGTVFFFTIQLSICIWLSTAPPFPVNSKNINTK  
IILECDIGSLTGFSCLLGYGLLACIFLAFARLNDPDTFNEAKITFSMLIFCAVWITFIPAYISSPGKYTVAVEIFAILSSSAGLGCIFIPKCYIILLRPPDRNSRGLTKNLNE  
>Redfish, locus40375.1

MGMLTAVIALGACMLFVLIIFQYRSTPIVVKANNSLSFLLLISLTLFCVCLCFIGQPSHVTCLRHVMGFSVLCISICLVKTIIVVIMAFKATLPGNNIMKWFAGAAQRGTVFFFTIQLSICIWLSTAPPFPVNSKNINTK  
IILECDIGSLTGFSCLLGYGLLACIFLAFARLNDPDTFNEAKITFSMLIFCAVWITFIPAYISSPGKYTVAVEIFAILSSSAGLGCIFIPKCYIILLRPPDRNSRGLTKNLNE  
>Mouse, locus248.1

CVQCPESHYANSEKHNCLQKVSFLAYEELGMLITITLADFSVLTAVLVVFKHRDTPIVKANRNSVLSYLLTLIICFLSCLLYIROPNTATCIIQOAFGLTFTVALSTVLAKAVVITAFKTSAPRMVRLVSGAPNSIPI  
CTLIQILIIYGLWATSPFPIDQNAHVEHGHIIIMCNKGSVAFAVYCVLGLGVLGAGVSVFAFLARLNDPDTFNEAKITFSMLIFCAVWITFIPAYISSPGKYTVAVEIFAILSSSAGLGCIFIPKCYIILLRPPDRNSRGLTKNLNE  
>Zebrafish, locus480.1

MGITLTTALSGTCLSIGLMIIFQYRNTPIVVKANNSLSFLLLVSLTLFCVCLCFIGQPSHVTCLRHVMGFSVLCISICLVKTIIVVIMAFKATLPGNNIMKWFAGAAQRGTVFFFTIQLSICIWLSTAPPFPVNSKNINTK  
IILECDIGSLTGFSCLLGYGLLACIFLAFARLNDPDTFNEAKITFSMLIFCAVWITFIPAYISSPGKYTVAVEIFAILSSSAGLGCIFIPKCYIILLRPPDRNSRGLTKNLNE  
>Western\_c\_lawed\_frog, locus661.1

CIKSKYKSNTEQDGPCKPKNINFLSYDILGATLSSITILCAVTCVAVLIGFIKYRETPIVRANRNNRSLYLLISLMSFLCFLCFLVIFIGRPTQICCLLRQTVFVITFISVSSVLAKTIVVIAFNATKPKGSLKHYVGTQALIAIVLVIV  
CSLGEIISIVMLSNPPFSETDLSDPENIILLCEGNSGFFFCIIGYIGTLALLSFAAFLAKDFPDRFNEAKITFSMLGFCVSWGAFVAPYLSKSGSRMVAVEIFAILSSSAGLGCIFIPKCYIILLRPPDRNSRGLTKNLNE  
>Western\_c\_lawed\_frog, locus658.1

CIKSKYKSNTEQDGPCKPKNINFLSYDILGATLSSITILCAVTCVAVLIGFIKYRETPIVRANRNNRSLYLLISLMSFLCFLCFLVIFIGRPTQICCLLRQTVFVITFISVSSVLAKTIVVIAFNATKPKGSLKHYVGTQALIAIVLVIV  
CSLGEIISIVMLSNPPFSETDLSDPENIILLCEGNSGFFFCIIGYIGTLALLSFAAFLAKDFPDRFNEAKITFSMLGFCVSWGAFVAPYLSKSGSRMVAVEIFAILSSSAGLGCIFIPKCYIILLRPPDRNSRGLTKNLNE  
>Western\_c\_lawed\_frog, locus660.1

MNYLSYDEHLSGTFSSIVLSITCAVILGFIKYRETPIVRANRNNRSLYLLISLMSFLCFLCFLVIFIGRPTQICCLLRQTVFVITFISVSSVLAKTIVVIAFNATKPKGSLKHYVGTQALIAIVLVIVCSLGEIISIVMLSNPPFPE  
DEILSDADITILLCEGNSGFFFCIIGYIGTLALLSFAAFLAKDFPDRFNEAKITFSMLGFCVSWGAFVAPYLSKSGSRMVAVEIFAILSSSAGLGCIFIPKCYIILLRPPDRNSRGLTKNLNE  
>Western\_c\_lawed\_frog, locus750.1

MNYLSYDDHLSGTFSSIVLSITCAVILGFIKYRETPIVRANRNNRSLYLLISLMSFLCFLCFLVIFIGRPTQICCLLRQTVFVITFISVSSVLAKTIVVIAFNATKPKGSLKHYVGTQALIAIVLVIVCSLGEIISIVMLSNPPFPE  
DEILSDADITILLCEGNSGFFFCIIGYIGTLALLSFAAFLAKDFPDRFNEAKITFSMLGFCVSWGAFVAPYLSKSGSRMVAVEIFAILSSSAGLGCIFIPKCYIILLRPPDRNSRGLTKNLNE  
>Caecilian, locus40469.1

CIKCPANQNSNQRDACPIMIFLSEYELLGIVLILISIVFFLITAVILGIFIYRDPPIVRANRNNRSLYLLISLMSFLCFLCFLVIFIGRPTQICCLLRQTVFVITFISLSSVLAKTIVVIAFNATKPKGSLKHYVGTQALIAIVLVIV  
CSLIQTVLCLAWLFTAPPFPYLMKSEIGLITLCEGNSIVAFVYCVLGLGVLGAGVSVFAFLARLNDPDSFNEAKITFSMLGFCVSWGAFVAPYLSKSGSRMVAVEIFAILSSSAGLGCIFIPKCYIILLRPPDRNSRGLTKNLNE  
>Caecilian, locus40329.1





































>Zebrafish, locus521.1

CTVCPDEFWSNLKNDKQCPKPEIEFLSYEDPLGSLTTASLLGTGCFACVMIIFTHRNPPIVRANNSSELSFLLLSLKLCLFVLLFIGOPQLWTCQLRHAVFGISFVLCISSILVKTVMVIAVFKSSRPGSGAMKWFAGAAQQRCTVLV

>Zebrafish, locus526.1

CTVCPDEFWSNFKNDKQCPKPEIEFLSYEDPLGSLTTASLLGTGCFACVMIIFTHRNPPIVRANNSSELSFLLLSLKLCLFVLLFIGOPQLWTCQLRHAVFGISFVLCISSILVKTVMVIAVFNSSRPGSGAMKWFAGAAQQRCTVLV

>Zebrafish, locus525.1

CTVCPDEFWSNFKNDKQCPKPEIEFLSYEDPLGSLTTASLLGTGCFACVMIIFTHRNPPIVRANNSSELSFLLLSLKLCLFVLLFIGOPQLWTCQLRHAVFGISFVLCISSILVKTVMVIAVFNSSRPGSGAMKWFAGAAQQRCTVLV

>Zebrafish, locus532.1

CTVCPDEFWSNFKNDKQCPKPEIEFLSYEDPLGSLTTASLLGTGCFACVMIIFTHRNPPIVRANNSSELSFLLLSLKLCLFVLLFIGOPQLWTCQLRHAVFGISFVLCISSILVKTVMVIAVFNSSRPGSGAMKWFAGAAQQRCTVLV

>Zebrafish, locus522.1

CTVCPDEFWSNLKNDKQCPKPEIEFLSYEDPLGSLTTASLLGTGCFACVMIIFTHRNPPIVRANNSSELSFLLLSLKLCLFVLLFIGOPQLWTCQLRHAVFGISFVLCISSILVKTVMVIAVFNSSRPGSGAMKWFAGAAQQRCTVLV

>marker, zebrafish\_16\_6\_F

CPDFFWSNLKNDKQCPKPEIEFLSYEDPLGSLTTASLLGTGCFACVMIIFTHRNPPIVRANNSSELSFLLLSLKLCLFVLLFIGOPQLWTCQLRHAVFGISFVLCISSILVKTVMVIAVFNSSRPGSGAMKWFAGAAQQRCTVLV

>Zebrafish, locus524.1

CTVCPDEFWSNLKNDKQCPKPEIEFLSYEDPLGSLTTASLLGTGCFACVMIIFTHRNPPIVRANNSSELSFLLLSLKLCLFVLLFIGOPQLWTCQLRHAVFGISFVLCISSILVKTVMVIAVFNSSRPGSGAMKWFAGAAQQRCTVLV

>Cloudy\_catshark, locus87.1

CFQCPEPWSNFKNDKQCPKPEIEFLSYEDPLGSLTTASLLGTGCFACVMIIFTHRNPPIVRANNSSELSFLLLSLKLCLFVLLFIGOPQLWTCQLRHAVFGISFVLCISSILVKTVMVIAVFNSSRPGSGAMKWFAGAAQQRCTVLV

>Great\_white\_shark, locus10.1

CFQCPEPWSNFKNDKQCPKPEIEFLSYEDPLGSLTTASLLGTGCFACVMIIFTHRNPPIVRANNSSELSFLLLSLKLCLFVLLFIGOPQLWTCQLRHAVFGISFVLCISSILVKTVMVIAVFNSSRPGSGAMKWFAGAAQQRCTVLV

>Brownbanded\_bambooshark, locus519.1

CFQCPEPWSNFKNDKQCPKPEIEFLSYEDPLGSLTTASLLGTGCFACVMIIFTHRNPPIVRANNSSELSFLLLSLKLCLFVLLFIGOPQLWTCQLRHAVFGISFVLCISSILVKTVMVIAVFNSSRPGSGAMKWFAGAAQQRCTVLV

>Thorny\_skate, locus24.1

CFQCPEPWSNFKNDKQCPKPEIEFLSYEDPLGSLTTASLLGTGCFACVMIIFTHRNPPIVRANNSSELSFLLLSLKLCLFVLLFIGOPQLWTCQLRHAVFGISFVLCISSILVKTVMVIAVFNSSRPGSGAMKWFAGAAQQRCTVLV

>Little\_skate, locus5.1

CFQCPEPWSNFKNDKQCPKPEIEFLSYEDPLGSLTTASLLGTGCFACVMIIFTHRNPPIVRANNSSELSFLLLSLKLCLFVLLFIGOPQLWTCQLRHAVFGISFVLCISSILVKTVMVIAVFNSSRPGSGAMKWFAGAAQQRCTVLV

>Smalltooth\_sawfish, locus20.1

CFQCPEPWSNFKNDKQCPKPEIEFLSYEDPLGSLTTASLLGTGCFACVMIIFTHRNPPIVRANNSSELSFLLLSLKLCLFVLLFIGOPQLWTCQLRHAVFGISFVLCISSILVKTVMVIAVFNSSRPGSGAMKWFAGAAQQRCTVLV

>marker, fugu\_15\_1\_F

CPPEFWSNDRGTACVPRQLDFLFSNETLGVALTAVAVSGAVTAVFVFLHYRHTPMVRANNSSELSFLLLSLKLCLFVLLFIGOPQLWTCQLRHAVFGISFVLCISSILVKTVMVIAVFNSSRPGSGAMKWFAGAAQQRCTVLV

>Reedfish, locus27554.1

MCSCLPDYNSNEQKDHCVLKIIEFLSFGIEGIIIVLTCVSLFGVTLTALVASIFFYKPEPVPVKANNSSELSFLLLSLMLCFSCSLTFIGEPQSWCTIRHTTGITFVLCISCLAKTIVVLMFRATLPGNNIMKWFAGPTQRLSVLA

>Reedfish, locus40520.1

CLSCPLDYNSEKQDHCVLKIIEFLSFGIEGIIIVLTCVSLFGVTLTALVASIFFYKPEPVPVKANNSSELSFLLLSLMLCFSCSLTFIGEPQSWCTIRHTTGITFVLCISCLAKTIVVLMFRATLPGNNIMKWFAGPTQRLSVLA

>Whale\_shark, locus79.1

MGIIIVLAFAGLSTIGVFLFYHHRNPPIVRANNSSELSFLLLSLKLCLFVLLFIGOPQLWTCQLRHAVFGISFVLCISSILVKTVMVIAVFNSSRPGSGAMKWFAGAAQQRCTVLV

>Whale\_shark, locus77.1

CIKCPWEYRSNRRDEICLKIIEFLSFGDLGVLVTLTALVAGLSTIGVFLFYHHRNPPIVRANNSSELSFLLLSLKLCLFVLLFIGOPQLWTCQLRHAVFGISFVLCISSILVKTVMVIAVFNSSRPGSGAMKWFAGAAQQRCTVLV

>Whale\_shark, locus61.1

MMGIIFVTALLGVSITGVFLFYHHRNPPIVRANNSSELSFLLLSLKLCLFVLLFIGOPQLWTCQLRHAVFGISFVLCISSILVKTVMVIAVFNSSRPGSGAMKWFAGAAQQRCTVLV

>Cloudy\_catshark, locus43.1

HKCPWYRSNDRDQKILKEVFLSFAELMGIIIVLTCVSLFGVTLTALVAGLSTIGVFLFYHHRNPPIVRANNSSELSFLLLSLMLCFSCSLTFIGEPQSWCTIRHTTGITFVLCISCLAKTIVVLMFRATLPGNNIMKWFAGPTQRLSVLA

>Great\_white\_shark, locus29.1

CINCPLEYSNDRDQKILKEVFLSFAELMGIIIVLTCVSLFGVTLTALVAGLSTIGVFLFYHHRNPPIVRANNSSELSFLLLSLMLCFSCSLTFIGEPQSWCTIRHTTGITFVLCISCLAKTIVVLMFRATLPGNNIMKWFAGPTQRLSVLA

>Smalltooth\_sawfish, locus36.1

MGITLLVALLGASITMGVFTFYHHRNPPIVRANNSSELSFLLLSLKLCLFVLLFIGOPQLWTCQLRHAVFGISFVLCISSILVKTVMVIAVFNSSRPGSGAMKWFAGAAQQRCTVLV

>Caecilian, locus40504.1

CVSCSEDORPNHERNSICPKLITFLSYEDSLGNLTTSSIFFLINVILRIFITYRDPPIVRANNSSELSFLLLSLMLCFSCSLTFIGEPQSWCTIRHTTGITFVLCISCLAKTIVVLMFRATLPGNNIMKWFAGPTQRLSVLA

>Caecilian, locus40497.1

CVSCREDORPNHERNTICPKLITFLSYEDSLGNLTTSSIFFLINVILRIFITYRDPPIVRANNSSELSFLLLSLMLCFSCSLTFIGEPQSWCTIRHTTGITFVLCISCLAKTIVVLMFRATLPGNNIMKWFAGPTQRLSVLA

>Caecilian, locus40502.1

CVSCSEORPNHERNSICPKLITFLSYEDSLGNLTTSSIFFLINVILRIFITYRDPPIVRANNSSELSFLLLSLMLCFSCSLTFIGEPQSWCTIRHTTGITFVLCISCLAKTIVVLMFRATLPGNNIMKWFAGPTQRLSVLA

>Caecilian, locus40494.1

CVSCREDORPNHERNTICPKLITFLSYEDSLGNLTTSSIFFLINVILRIFITYRDPPIVRANNSSELSFLLLSLMLCFSCSLTFIGEPQSWCTIRHTTGITFVLCISCLAKTIVVLMFRATLPGNNIMKWFAGPTQRLSVLA

>Caecilian, locus40499.1

CMPCREDORPNHRDTCIPKLIIFLFLSYEDSLGNLTTSSIFFLINVILRIFITYRDPPIVRANNSSELSFLLLSLMLCFSCSLTFIGEPQSWCTIRHTTGITFVLCISCLAKTIVVLMFRATLPGNNIMKWFAGPTQRLSVLA

>Caecilian, locus40498.1

CMPCREDORPNHRDTCIPKLIIFLFLSYEDSLGNLTTSSIFFLINVILRIFITYRDPPIVRANNSSELSFLLLSLMLCFSCSLTFIGEPQSWCTIRHTTGITFVLCISCLAKTIVVLMFRATLPGNNIMKWFAGPTQRLSVLA

>Caecilian, locus40492.1

CIKCPEDQNSKDRDQKILKEVFLSFAELMGIIIVLTCVSLFGVTLTALVAGLSTIGVFLFYHHRNPPIVRANNSSELSFLLLSLMLCFSCSLTFIGEPQSWCTIRHTTGITFVLCISCLAKTIVVLMFRATLPGNNIMKWFAGPTQRLSVLA

>Spotted\_gar, locus147.1

CFQCPLDWSNDRDQKILKEVFLSFAELMGIIIVLTCVSLFGVTLTALVAGLSTIGVFLFYHHRNPPIVRANNSSELSFLLLSLMLCFSCSLTFIGEPQSWCTIRHTTGITFVLCISCLAKTIVVLMFRATLPGNNIMKWFAGPTQRLSVLA

>Spotted\_gar, locus148.1

CFKCPDWSNDRDQKILKEVFLSFAELMGIIIVLTCVSLFGVTLTALVAGLSTIGVFLFYHHRNPPIVRANNSSELSFLLLSLMLCFSCSLTFIGEPQSWCTIRHTTGITFVLCISCLAKTIVVLMFRATLPGNNIMKWFAGPTQRLSVLA

>Spotted\_gar, locus152.1

CFQCPLDWSNDRDQKILKEVFLSFAELMGIIIVLTCVSLFGVTLTALVAGLSTIGVFLFYHHRNPPIVRANNSSELSFLLLSLMLCFSCSLTFIGEPQSWCTIRHTTGITFVLCISCLAKTIVVLMFRATLPGNNIMKWFAGPTQRLSVLA

>Western\_c\_lawed\_frog, locus1009.1

CFKCPINQWPNLRITCTDKVIITLVSHEPLGASLALLSVLFCIMTCLVMIIFTKYRNTAVKANNRDLISYLLVSLKICFCLNLMFIGHPRHVTCLIRQTVFGVIFSVISSLAKTIVVLMFRATLPGNNIMKWFAGPTQRLSVLA

>Western\_c\_lawed\_frog, locus1007.1

CFKCPINQWPNLRITCTDKVIITLVSHEPLGASLALLSVLFCIMTCLVMIIFTKYRNTAVKANNRDLISYLLVSLKICFCLNLMFIGHPRHVTCLIRQTVFGVIFSVISSLAKTIVVLMFRATLPGNNIMKWFAGPTQRLSVLA

>Western\_c\_lawed\_frog, locus997.1

CFKCPINQWPNLRITCTDKVIITLVSHEPLGASLALLSVLFCIMTCLVMIIFTKYRNTAVKANNRDLISYLLVSLKICFCLNLMFIGHPRHVTCLIRQTVFGVIFSVISSLAKTIVVLMFRATLPGNNIMKWFAGPTQRLSVLA

>Western\_c\_lawed\_frog, locus1014.1

CFKCPINQWPNLRITCTDKVIITLVSHEPLGASLALLSVLFCIMTCLVMIIFTKYRNTAVKANNRDLISYLLVSLKICFCLNLMFIGHPRHVTCLIRQTVFGVIFSVISSLAKTIVVLMFRATLPGNNIMKWFAGPTQRLSVLA

>Western\_c\_lawed\_frog, locus908.1

CFKCPINQWPNLRITCTDKVIITLVSHEPLGASLALLSVLFCIMTCLVMIIFTKYRNTAVKANNRDLISYLLVSLKICFCLNLMFIGHPRHVTCLIRQTVFGVIFSVISSLAKTIVVLMFRATLPGNNIMKWFAGPTQRLSVLA

>Western\_c\_lawed\_frog, locus1011.1

CLKCPINQWPNLRITCTDKVIITLVSHEPLGASLALLSVLFCIMTCLVMIIFTKYRNTAVKANNRDLISYLLVSLKICFCLNLMFIGHPRHVTCLIRQTVFGVIFSVISSLAKTIVVLMFRATLPGNNIMKWFAGPTQRLSVLA





MALITISLWFLAVLVVFKHRDTPVKANNRSLYIILLTLFISFLSLLFVGPNTTTCILQQTAFGLIFVLSLTVLAKAITVIAFKAIVPARMVRLVMSRAPNFIIPICTLIQIICGIWLLTSPFFIDQDQAEHGHI  
IVNMGSTVAFHVLGVLCSLALGSYMAFLSRNLPDTPNEAKLFSFMQVFFCVWITFLPVYHSTKGMVMAVEVFSILASSIALLGLNFAPKCYIILLRPEKISCIDIRHXYT  
>Mouse, locus234.1  
CVCKPESHYANSEKHNCKQKVSFLAYEELPMALITAIACFSLLTALVAVFVKHRDTPVKANNRSLYIILLTLFICLLSLLFVIGPNTTTCILQQTAFGLIFVLSLTVLAKAITVIAFKAIVPARMVRLVMSRAPNFIIPI  
CTLIQIICGIWLLTSPFFIDQDQAEHGHIIVNMGSTVAFHVLGVLCSLALGSYMAFLSRNLPDTPNEAKLFSFMQVFFCVWITFLPVYHSTKGMVMAVEVFSILASSIALLGLNFAPKCYIILLRPEKISCIDIRHXYT  
>Mouse, locus237.1  
CVCKPESHYANSEKHNCKQKVSFLAYEELPMALITAIACFSLLTALVAVFVKHRDTPVKANNRSLYIILLTLFISFLSLLFVIGPNTTTCILQQTAFGLIFVLSLTVLAKAITVIAFKAIVPARMVRLVMSRAPNFIIPI  
CTLIQIICGIWLLTSPFFIDQDQAEHGHIIVNMGSTVAFHVLGVLCSLALGSYMAFLSRNLPDTPNEAKLFSFMQVFFCVWITFLPVYHSTKGMVMAVEVFSILASSIALLGLNFAPKCYIILLRPEKISCIDIRHXYT  
>Mouse, locus244.1  
CVCKPESHYANSEKHNCKQKVSFLAYEELPMALITAIACFSLLTALVAVFVKHRDTPVKANNRSLYIILLTLFISFLSLLFVIGPNTTTCILQQTAFGLIFVLSLTVLAKAITVIAFKAIVPARMVRLVMSRAPNFIIPI  
CTLIQIICGIWLLTSPFFIDQDQAEHGHIIVNMGSTVAFHVLGVLCSLALGSYMAFLSRNLPDTPNEAKLFSFMQVFFCVWITFLPVYHSTKGMVMAVEVFSILASSIALLGLNFAPKCYIILLRPEKISCIDIRHXYT  
>Mouse, locus246.1  
CVCKPESHYANSEKHNCKQKVSFLAYEELPMALITAIACFSLLTALVAVFVKHRDTPVKANNRSLYIILLTLFISFLSLLFVIGPNTTTCILQQTAFGLIFVLSLTVLAKAITVIAFKAIVPARMVRLVMSRAPNFIIPI  
CTLIQIICGIWLLTSPFFIDQDQAEHGHIIVNMGSTVAFHVLGVLCSLALGSYMAFLSRNLPDTPNEAKLFSFMQVFFCVWITFLPVYHSTKGMVMAVEVFSILASSIALLGLNFAPKCYIILLRPEKISCIDIRHXYT  
>Mouse, locus224.1  
CVCKPESHYANSEKHNCKQKVSFLAYEELPMALITAIACFSLLTALVAVFVKHRDTPVKANNRSLYIILLTLFISFLSLLFVIGPNTTTCILQQTAFGLIFVLSLTVLAKAITVIAFKAIVPARMVRLVMSRAPNFIIPI  
CTLIQIICGIWLLTSPFFIDQDQAEHGHIIVNMGSTVAFHVLGVLCSLALGSYMAFLSRNLPDTPNEAKLFSFMQVFFCVWITFLPVYHSTKGMVMAVEVFSILASSIALLGLNFAPKCYIILLRPEKISCIDIRHXYT  
>Mouse, locus403.1  
CVCKPESHYANSEKHNCKQKVSFLAYEELPMALITAIACFSLLTALVAVFVKHRDTPVKANNRSLYIILLTLFISFLSLLFVIGPNTTTCILQQTAFGLIFVLSLTVLAKAITVIAFKAIVPARMVRLVMSRAPNFIIPI  
CTLIQIICGIWLLTSPFFIDQDQAEHGHIIVNMGSTVAFHVLGVLCSLALGSYMAFLSRNLPDTPNEAKLFSFMQVFFCVWITFLPVYHSTKGMVMAVEVFSILASSIALLGLNFAPKCYIILLRPEKISCIDIRHXYT  
>Mouse, locus90.1

MALGFVLTAGVLGVFKYHHTPIVANKNOVLYIILLTLFALFCLPFLFVIGVNTATCIIQDSTFSLFVLSLTVLAKAITVIAFKAIVPARMVRLVMSRAPNFIIPICTLIQIICGIWLLTSPFFIDQDQAEHGHIIVNMG  
GSAVAFHVLGVLCSLALGSYMAFLSRNLPDTPNEAKLFSFMQVFFCVWITFLPVYHSTKGMVMAVEVFSILASSIALLGLNFAPKCYIILLRPEKISCIDIRHXYT  
>Redfish, locus40408.1

MGITLTFISFAGCVTTAVAVITFRQTPVVRANMELSFLLLLFLVLCFLCLPFAIGEPTNISCVRHRTLFGISFALCISCLGKTVVLMFAFRATLPGNNVMKWFGLAQQRASVFICTSIQIIVICWLLTSPFYAIPNSKFNHNSK  
IILECSVGSAGFVCLVSIYGLFASMCVIAFLARLKNLDPNFNEAKLFTFMSLIFCAVWITFIPAYISTPGKYTVAVELFAILASAGLLFCIFAPKCYIILLRPEKNTKXHMGGKNV  
>Redfish, locus40406.1  
CLKCSLEKSNKQKQKIPSEIYFSLYDQDGLGSLAFISFAGCVTTAVAVITFRQTPVVRANMELSFLLLLFLVLCFLCLPFAIGEPTNISCVRHRTLFGISFALCISCLGKTVVLMFAFRATLPGNNVMKWFGLAQQRASVFI  
CTSIQIIVICWLLTSPFYAIPNSKFNHNSKIILECSVGSAGFVCLVSIYGLFASMCVIAFLARLKNLDPNFNEAKLFTFMSLIFCAVWITFIPAYISTPGKYTVAVELFAILASAGLLFCIFAPKCYIILLRPEKNTKXHMGGKNV  
>Japanese\_eel, locus260.1  
CYRCPDWFNSQLRDRCPKPEIEFLSFEHPELGLISLTTISVLGACICAVTLVSVFARHNTPVVKNANSELSFLLLSLTLFCLCSSLFVIGPQORWTCQLRHAAGFISFALSISCLVKTIVVMAFAKARPGNTKWFVQOQRGTVLA  
FTIIQAVICVAVLTAASPVYKNTLRONSKIIYQCAVGSIAAGFALLGYIGLLAAISLFLAFLARLKNLDPNFNEAKLFTFMSLIFCAVWITFIPAYISTPGKYTVAVELFAILASAGLLFCIFAPKCYIILLRPEKNTKXHMGGKNV  
>Cloudy\_catshark, locus91.1  
CLCKPLEYMSNQQORCVLKKIEFLSFEHPELGLISLTTISVLGACICAVTLVSVFARHNTPVVKNANSELSFLLLSLTLFCLCSSLFVIGPQORWTCQLRHAAGFISFALSISCLVKTIVVMAFAKARPGNTKWFVQOQRGTVLA  
FTIIQAVICVAVLTAASPVYKNTLRONSKIIYQCAVGSIAAGFALLGYIGLLAAISLFLAFLARLKNLDPNFNEAKLFTFMSLIFCAVWITFIPAYISTPGKYTVAVELFAILASAGLLFCIFAPKCYIILLRPEKNTKXHMGGKNV  
>Japanese\_eel, locus82.1

MALAAAILGALSTAATAAIVFLHRRTPVVRANMELSFLLLSLTLFCLCSSLFVIGPQORWTCQLRHAAGFISFALSISCLVKTIVVMAFAKARPGNTKWFVQOQRGTVLA  
FTIIQAVICVAVLTAASPVYKNTLRONSKIIYQCAVGSIAAGFALLGYIGLLAAISLFLAFLARLKNLDPNFNEAKLFTFMSLIFCAVWITFIPAYISTPGKYTVAVELFAILASAGLLFCIFAPKCYIILLRPEKNTKXHMGGKNV  
>Western\_c\_lawed\_frog, locus103.1  
CIKCHIEYWPNEEKTCKIEKQTEFLSYDDPLTLVFIIVLSVSVLTVLIGIFISFRDTPVVRANMELSFLLLSLTLFCLCSSLFVIGPQORWTCQLRHAAGFISFALSISCLVKTIVVMAFAKARPGNTKWFVQOQRGTVLA  
FTIIQAVICVAVLTAASPVYKNTLRONSKIIYQCAVGSIAAGFALLGYIGLLAAISLFLAFLARLKNLDPNFNEAKLFTFMSLIFCAVWITFIPAYISTPGKYTVAVELFAILASAGLLFCIFAPKCYIILLRPEKNTKXHMGGKNV  
>Western\_c\_lawed\_frog, locus102.1  
CIKCHIEYWPNEEKTCKIEKQTEFLSYDDPLTLVFIIVLSVSVLTVLIGIFISFRDTPVVRANMELSFLLLSLTLFCLCSSLFVIGPQORWTCQLRHAAGFISFALSISCLVKTIVVMAFAKARPGNTKWFVQOQRGTVLA  
FTIIQAVICVAVLTAASPVYKNTLRONSKIIYQCAVGSIAAGFALLGYIGLLAAISLFLAFLARLKNLDPNFNEAKLFTFMSLIFCAVWITFIPAYISTPGKYTVAVELFAILASAGLLFCIFAPKCYIILLRPEKNTKXHMGGKNV  
>Western\_c\_lawed\_frog, locus101.1  
CIKCHIEYWPNEEKTCKIEKQTEFLSYDDPLTLVFIIVLSVSVLTVLIGIFISFRDTPVVRANMELSFLLLSLTLFCLCSSLFVIGPQORWTCQLRHAAGFISFALSISCLVKTIVVMAFAKARPGNTKWFVQOQRGTVLA  
FTIIQAVICVAVLTAASPVYKNTLRONSKIIYQCAVGSIAAGFALLGYIGLLAAISLFLAFLARLKNLDPNFNEAKLFTFMSLIFCAVWITFIPAYISTPGKYTVAVELFAILASAGLLFCIFAPKCYIILLRPEKNTKXHMGGKNV  
>Western\_c\_lawed\_frog, locus1018.1

MKERCLPKIIFLSYDEPLGSSLACISVLFCLITFSAFCLFIAKRKTPVVRANMELSFLLLSLTLFCLCSSLFVIGPQORWTCQLRHAAGFISFALSISCLVKTIVVMAFAKARPGNTKWFVQOQRGTVLA  
FTIIQAVICVAVLTAASPVYKNTLRONSKIIYQCAVGSIAAGFALLGYIGLLAAISLFLAFLARLKNLDPNFNEAKLFTFMSLIFCAVWITFIPAYISTPGKYTVAVELFAILASAGLLFCIFAPKCYIILLRPEKNTKXHMGGKNV  
>Western\_c\_lawed\_frog, locus1020.1  
CLCKPEDWPSMKERCLPKIIFLSYDEPLGSSLACISVLFCLITFSAFCLFIAKRKTPVVRANMELSFLLLSLTLFCLCSSLFVIGPQORWTCQLRHAAGFISFALSISCLVKTIVVMAFAKARPGNTKWFVQOQRGTVLA  
FTIIQAVICVAVLTAASPVYKNTLRONSKIIYQCAVGSIAAGFALLGYIGLLAAISLFLAFLARLKNLDPNFNEAKLFTFMSLIFCAVWITFIPAYISTPGKYTVAVELFAILASAGLLFCIFAPKCYIILLRPEKNTKXHMGGKNV  
>Anole\_lizard, locus211.1

MVKANNRDLTYMLVSLFLSFLSFLFVIGPQORWTCQLRHAAGFISFALSISCLVKTIVVMAFAKARPGNTKWFVQOQRGTVLA  
FTIIQAVICVAVLTAASPVYKNTLRONSKIIYQCAVGSIAAGFALLGYIGLLAAISLFLAFLARLKNLDPNFNEAKLFTFMSLIFCAVWITFIPAYISTPGKYTVAVELFAILASAGLLFCIFAPKCYIILLRPEKNTKXHMGGKNV  
>Western\_c\_lawed\_frog, locus444.1

MHPNSARDRLCKPTEFLSYEELPAILLASTGIVSISLIPISFRDTPVVRANMELSFLLLSLTLFCLCSSLFVIGPQORWTCQLRHAAGFISFALSISCLVKTIVVMAFAKARPGNTKWFVQOQRGTVLA  
FTIIQAVICVAVLTAASPVYKNTLRONSKIIYQCAVGSIAAGFALLGYIGLLAAISLFLAFLARLKNLDPNFNEAKLFTFMSLIFCAVWITFIPAYISTPGKYTVAVELFAILASAGLLFCIFAPKCYIILLRPEKNTKXHMGGKNV  
>Japanese\_eel, locus272.1  
CYRCPDWFNSQLRDRCPKPEIEFLSFEHPELGLISLTTISVLGACICAVTLVSVFARHNTPVVKNANSELSFLLLSLTLFCLCSSLFVIGPQORWTCQLRHAAGFISFALSISCLVKTIVVMAFAKARPGNTKWFVQOQRGTVLA  
FTIIQAVICVAVLTAASPVYKNTLRONSKIIYQCAVGSIAAGFALLGYIGLLAAISLFLAFLARLKNLDPNFNEAKLFTFMSLIFCAVWITFIPAYISTPGKYTVAVELFAILASAGLLFCIFAPKCYIILLRPEKNTKXHMGGKNV  
>Western\_c\_lawed\_frog, locus177.1  
CLCKEDTEWPNQEKTCIEKQTEFLSYDDPLTLVFIIVLSVSVLTVLIGIFISFRDTPVVRANMELSFLLLSLTLFCLCSSLFVIGPQORWTCQLRHAAGFISFALSISCLVKTIVVMAFAKARPGNTKWFVQOQRGTVLA  
FTIIQAVICVAVLTAASPVYKNTLRONSKIIYQCAVGSIAAGFALLGYIGLLAAISLFLAFLARLKNLDPNFNEAKLFTFMSLIFCAVWITFIPAYISTPGKYTVAVELFAILASAGLLFCIFAPKCYIILLRPEKNTKXHMGGKNV  
>Anole\_lizard, locus183.1  
CTKPLDQHPKQNRCPKNTFSLYEELGMLNLSIALLSITTCVFGVITNOQTPVVRANMELSFLLLSLTLFCLCSSLFVIGPQORWTCQLRHAAGFISFALSISCLVKTIVVMAFAKARPGNTKWFVQOQRGTVLA  
FTIIQAVICVAVLTAASPVYKNTLRONSKIIYQCAVGSIAAGFALLGYIGLLAAISLFLAFLARLKNLDPNFNEAKLFTFMSLIFCAVWITFIPAYISTPGKYTVAVELFAILASAGLLFCIFAPKCYIILLRPEKNTKXHMGGKNV  
>Anole\_lizard, locus184.1  
CNKCPDQHPKQNRCPKNTFSLYEELGMLNLSIALLSITTCVFGVITNOQTPVVRANMELSFLLLSLTLFCLCSSLFVIGPQORWTCQLRHAAGFISFALSISCLVKTIVVMAFAKARPGNTKWFVQOQRGTVLA  
FTIIQAVICVAVLTAASPVYKNTLRONSKIIYQCAVGSIAAGFALLGYIGLLAAISLFLAFLARLKNLDPNFNEAKLFTFMSLIFCAVWITFIPAYISTPGKYTVAVELFAILASAGLLFCIFAPKCYIILLRPEKNTKXHMGGKNV  
>Mouse, locus354.1  
CVRCPDQHPKQNRCPKNTFSLYEELGMLNLSIALLSITTCVFGVITNOQTPVVRANMELSFLLLSLTLFCLCSSLFVIGPQORWTCQLRHAAGFISFALSISCLVKTIVVMAFAKARPGNTKWFVQOQRGTVLA  
FTIIQAVICVAVLTAASPVYKNTLRONSKIIYQCAVGSIAAGFALLGYIGLLAAISLFLAFLARLKNLDPNFNEAKLFTFMSLIFCAVWITFIPAYISTPGKYTVAVELFAILASAGLLFCIFAPKCYIILLRPEKNTKXHMGGKNV  
>Redfish, locus40372.1  
CECKOPYFWSNPERTQCPKVEEFLSHEDALGIALTAVLSGAALSLAVLAVFYIYRTPVVRANMELSFLLLSLTLFCLCSSLFVIGPQORWTCQLRHAAGFISFALSISCLVKTIVVMAFAKARPGNTKWFVQOQRGTVLA  
FTIIQAVICVAVLTAASPVYKNTLRONSKIIYQCAVGSIAAGFALLGYIGLLAAISLFLAFLARLKNLDPNFNEAKLFTFMSLIFCAVWITFIPAYISTPGKYTVAVELFAILASAGLLFCIFAPKCYIILLRPEKNTKXHMGGKNV  
>Redfish, locus40371.1

MGITLTAVALSAGALSLAVLAVFYIYRTPVVRANMELSFLLLSLTLFCLCSSLFVIGPQORWTCQLRHAAGFISFALSISCLVKTIVVMAFAKARPGNTKWFVQOQRGTVLA  
FTIIQAVICVAVLTAASPVYKNTLRONSKIIYQCAVGSIAAGFALLGYIGLLAAISLFLAFLARLKNLDPNFNEAKLFTFMSLIFCAVWITFIPAYISTPGKYTVAVELFAILASAGLLFCIFAPKCYIILLRPEKNTKXHMGGKNV  
>Redfish, locus40368.1  
CDKCPDQHPKQNRCPKNTFSLYEELGMLNLSIALLSITTCVFGVITNOQTPVVRANMELSFLLLSLTLFCLCSSLFVIGPQORWTCQLRHAAGFISFALSISCLVKTIVVMAFAKARPGNTKWFVQOQRGTVLA  
FTIIQAVICVAVLTAASPVYKNTLRONSKIIYQCAVGSIAAGFALLGYIGLLAAISLFLAFLARLKNLDPNFNEAKLFTFMSLIFCAVWITFIPAYISTPGKYTVAVELFAILASAGLLFCIFAPKCYIILLRPEKNTKXHMGGKNV  
>Redfish, locus27689.1  
-MKCPDQHPKQNRCPKNTFSLYEELGMLNLSIALLSITTCVFGVITNOQTPVVRANMELSFLLLSLTLFCLCSSLFVIGPQORWTCQLRHAAGFISFALSISCLVKTIVVMAFAKARPGNTKWFVQOQRGTVLA  
FTIIQAVICVAVLTAASPVYKNTLRONSKIIYQCAVGSIAAGFALLGYIGLLAAISLFLAFLARLKNLDPNFNEAKLFTFMSLIFCAVWITFIPAYISTPGKYTVAVELFAILASAGLLFCIFAPKCYIILLRPEKNTKXHMGGKNV  
>Coelacanth, locus412.1  
CLCKPDDWNSQNEQNECPKTEFLVYEDLAGAALAVSIFCALASTAVLAVFYIYRTPVVRANMELSFLLLSLTLFCLCSSLFVIGPQORWTCQLRHAAGFISFALSISCLVKTIVVMAFAKARPGNTKWFVQOQRGTVLA  
FTIIQAVICVAVLTAASPVYKNTLRONSKIIYQCAVGSIAAGFALLGYIGLLAAISLFLAFLARLKNLDPNFNEAKLFTFMSLIFCAVWITFIPAYISTPGKYTVAVELFAILASAGLLFCIFAPKCYIILLRPEKNTKXHMGGKNV  
>Spotted\_gar, locus110.1

MGITLTAVALSAGALSLAVLAVFYIYRTPVVRANMELSFLLLSLTLFCLCSSLFVIGPQORWTCQLRHAAGFISFALSISCLVKTIVVMAFAKARPGNTKWFVQOQRGTVLA  
FTIIQAVICVAVLTAASPVYKNTLRONSKIIYQCAVGSIAAGFALLGYIGLLAAISLFLAFLARLKNLDPNFNEAKLFTFMSLIFCAVWITFIPAYISTPGKYTVAVELFAILASAGLLFCIFAPKCYIILLRPEKNTKXHMGGKNV  
>Spotted\_gar, locus113.1  
CVCKPESHYANSEKHNCKQKVSFLAYEELPMALITAIACFSLLTALVAVFVKHRDTPVKANNRSLYIILLTLFICLLSLLFVIGPNTTTCILQQTAFGLIFVLSLTVLAKAITVIAFKAIVPARMVRLVMSRAPNFIIPI  
CTLIQIICGIWLLTSPFFIDQDQAEHGHIIVNMGSTVAFHVLGVLCSLALGSYMAFLSRNLPDTPNEAKLFSFMQVFFCVWITFLPVYHSTKGMVMAVEVFSILASSIALLGLNFAPKCYIILLRPEKISCIDIRHXYT  
>Spotted\_gar, locus105.1  
CIKCHIEYWPNEEKTCKIEKQTEFLSYDDPLTLVFIIVLSVSVLTVLIGIFISFRDTPVVRANMELSFLLLSLTLFCLCSSLFVIGPQORWTCQLRHAAGFISFALSISCLVKTIVVMAFAKARPGNTKWFVQOQRGTVLA  
FTIIQAVICVAVLTAASPVYKNTLRONSKIIYQCAVGSIAAGFALLGYIGLLAAISLFLAFLARLKNLDPNFNEAKLFTFMSLIFCAVWITFIPAYISTPGKYTVAVELFAILASAGLLFCIFAPKCYIILLRPEKNTKXHMGGKNV  
>Spotted\_gar, locus128.1  
CIKCHIEYWPNEEKTCKIEKQTEFLSYDDPLTLVFIIVLSVSVLTVLIGIFISFRDTPVVRANMELSFLLLSLTLFCLCSSLFVIGPQORWTCQLRHAAGFISFALSISCLVKTIVVMAFAKARPGNTKWFVQOQRGTVLA  
FTIIQAVICVAVLTAASPVYKNTLRONSKIIYQCAVGSIAAGFALLGYIGLLAAISLFLAFLARLKNLDPNFNEAKLFTFMSLIFCAVWITFIPAYISTPGKYTVAVELFAILASAGLLFCIFAPKCYIILLRPEKNTKXHMGGKNV  
>Cloudy\_catshark, locus78.1

MALNIAVIFRYRETPVVRANMELSFLLLSLTLFCLCSSLFVIGPQORWTCQLRHAAGFISFALSISCLVKTIVVMAFAKARPGNTKWFVQOQRGTVLA  
FTIIQAVICVAVLTAASPVYKNTLRONSKIIYQCAVGSIAAGFALLGYIGLLAAISLFLAFLARLKNLDPNFNEAKLFTFMSLIFCAVWITFIPAYISTPGKYTVAVELFAILASAGLLFCIFAPKCYIILLRPEKNTKXHMGGKNV  
>Redfish, locus40339.1  
CFCTPPEYWSNHERSECIQKTEFLSYDDGMLTATLSALGACLSLVLAIFHRRTPVVRANMELSFLLLSLTLFCLCSSLFVIGPQORWTCQLRHAAGFISFALSISCLVKTIVVMAFAKARPGNTKWFVQOQRGTVLA  
FTIIQAVICVAVLTAASPVYKNTLRONSKIIYQCAVGSIAAGFALLGYIGLLAAISLFLAFLARLKNLDPNFNEAKLFTFMSLIFCAVWITFIPAYISTPGKYTVAVELFAILASAGLLFCIFAPKCYIILLRPEKNTKXHMGGKNV  
>marker, zebrafish\_16\_1\_F

CPDEFWSSPKKNQCPVKDFEVLTYGDLPLGSLTASLLGSCISAVVIFAHHRHTPVVRANSELSFLLVSLKLCFLCVLLFIPGQPLWTRCLRHAVFGISFVLCISSILVKTMMVIAVFKSSRPGKSMKWFQSHQQRCTVLTALQVVICAVLWNASPKPKYNNQYTSKIVYECTISVGVFAMLLGYIGLAAVFSFLAFLARLNDPWFNEAKITFSMLIFCAVWITFIPAYISSPGKYTVAVEIFAILASSFGLLAAIFAPKCYIILLPERNTKKAINGRA-->Reedfish, locus40475.1

MGILLVLSLFGAFITLITLTYLNRTPVVRANSELSFLLFSLTCLFCLSTFIGEPEWSEMLRHTAFGITVVMCISCVLGTIVVMAFRATIPGNINMKWFGVMQORLSVCSFTLIQILICLLWLLTSPFPKPKIMRHSTETIILECDLGSKTAFYAVLGYIGLAAFLAFLARLNDPWFNEAKITFSMLIFCAVWITFIPAYISSPGKYTVAVEIFAILASSFGLLFCIFPKCYIILLPERNTKKNLMGKMP5>Reedfish, locus40481.1  
CVKCPLEYKANKQKQDCILKEIEFLSFEENMGILLVTLALLGASLTIAIGVVFYKRDPVIVKANSELSFLLFSLTCLFCLSTFIGEPTWSEMLRHTAFGITVFLCISCVLGTIVVMAFRATIPGNINMKWFGATQORLSVCMFTLVQVICTLWLMVSPFPKPKMAHTEIIEILECDLGSKTAFYAVLGYIGLAAFLAFLARLNDPWFNEAKITFSMLIFCAVWITFIPAYISSPGKYTVAVEIFAILASSFGLLFCIFPKCYIILLPERNTKKNLMGKMP>Reedfish, locus40483.1

MGILLVTLALLGASLTIAIGVVFYKRDPVIVKANSELSFLLFSLTCLFCLSTFIGEPTWSEMLRHTAFGITVFLCISCVLGTIVVMAFRATIPGNINMKWFGATQORLSVCMFTLIQVICTLWLLVSPFPKPKMAHIAEIIILECDLGSKTAFYAVLGYIGLAAFLAFLARLNDPWFNEAKITFSMLIFCAVWITFIPAYISSPGKYTVAVEIFAILASSFGLLFCIFPKCYIILLPERNTKKNLMGKMP5>Reedfish, locus40479.1  
CLCKSLEYKANKQKQDCILKEIEFLSFEENMGILLVTLALLGASLTIAIGVVFYKRDPVIVKANSELSFLLFSLTCLFCLSTFIGEPTWSEMLRHTAFGITVFLCISCVLGTIVVMAFRATIPGNINMKWFGAMQORLSVCMFTLIQVICTLWLMVSPFPKPKMAHTEIIEILECDLGSKTAFYAVLGYIGLAAFLAFLARLNDPWFNEAKITFSMLIFCAVWITFIPAYISSPGKYTVAVEIFAILASSFGLLFCIFPKCYIILLPERNTKKNLMGKMP5>Reedfish, locus40471.1

MGILLVALALLGASVTIAIFVYFRDTPVIVKANSELSFLLFSLTCLFCLSTFIGEPTWSEMLRHTAFGITVFLCISCVLGTIVVMAFRATIPGNINMKWFGATQORLSVCMFTLIQVICTLWLLVSPFPKPKMHKHYSEIIILECDLGSKTAFYAVLGYIGLAAFLAFLARLNDPWFNEAKITFSMLIFCAVWITFIPAYISSPGKYTVAVEIFAILASSFGLLFCIFPKCYIILLPERNTKKNLMGKMP5>Reedfish, locus40478.1

MGILLVTLALLGAFITIAIFVYFRDTPVIVKANSELSFLLFSLTCLFCLSTFIGEPTWSEMLRHTAFGITVFLCISCVLGTIVVMAFRATIPGNINMKWFGATQORLSVCMFTLIQVICTLWLLVSPFPKPKMHKHYSEIIILECDLGSKTAFYAVLGYIGLAAFLAFLARLNDPWFNEAKITFSMLIFCAVWITFIPAYISSPGKYTVAVEIFAILASSFGLLFCIFPKCYIILLPERNTKKNLMGKMP5>Reedfish, locus40513.1

MGILLVTLALLGAFITIAIFVYFRDTPVIVKANSELSFLLFSLTCLFCLSTFIGEPTWSEMLRHTAFGITVFLCISCVLGTIVVMAFRATIPGNINMKWFGATQORLSVCMFTLIQVICTLWLLVSPFPKPKMHKHYSEIIILECDLGSKTAFYAVLGYIGLAAFLAFLARLNDPWFNEAKITFSMLIFCAVWITFIPAYISSPGKYTVAVEIFAILASSFGLLFCIFPKCYIILLPERNTKKNLMGKMP5>Reedfish, locus40492.1

MGILLVTLALLGAFITIAIFVYKRDPVIVKANSELSFLLFSLTCLFCLSTFIGEPTWSEMLRHTAFGITVFLCISCVLGTIVVMAFRATIPGNINMKWFGATQORLSVCMFTLIQVICTLWLLVSPFPKPKMHKHYSEIIILECDLGSATAFYAVLGYIGLAAFLAFLARLNDPWFNEAKITFSMLIFCAVWITFIPAYISSPGKYTVAVEIFAILASSFGLLFCIFPKCYIILLPERNTKKNLMGKMP-->Reedfish, locus40486.1

MCYEEYKSNKQKQDCILKEIEFLSFEEMGILLMVLTVLGSALTSMAVIFVYFRDTPVIVKANSELSFLLFSLTCLFCLSTFIGEPEWSEMLRHTAFGITVFLCISCVLGTIVVMAFRATIPGNINMKWFGQIQRLSVCTFTLVQVILCLLWLLVSPFPKPKMHKHYSEIIILECDLGSATAFYAVLGYIGLAAFLAFLARLNDPWFNEAKITFSMLIFCAVWITFIPAYISSPGKYTVAVEIFAILASSFGLLFCIFPKCYIILLPERNTKKNLMGKMP5>Reedfish, locus27495.1

MKQIEFLSYEETMGIIAASAFSGSLFVIVFYNRHTPVIVKANSELSFLLVSLKLCFLCVLLFIPGQPLWTRCLRHAVFGISFVLCISSILVKTMMVIAVFKSSRPGKSMKWFQSHQQRCTVLTALQVVICAVLWNASPKPKYNNQYTSKIVYECTISVGVFAMLLGYIGLAAVFSFLAFLARLNDPWFNEAKITFSMLIFCAVWITFIPAYISSPGKYTVAVEIFAILASSFGLLAAIFAPKCYIILLPERNTKKAINGRA-->Mouse, locus176.1  
CVNCEYQYANTEQNKCIQKGVTFSLYEDPLGMLALMAFCFAFTAVLVCVFKHHDTPVIVKANRSLYSILLLSMSCFLCSFFFIGHNPRATCVLQITFIVTAVSTVLAKTVTVLAFKVDTPGRRLNLFVSGTPNYIPII  
CSLLQCLSAITLWLEVPDFVIDEHSOQHIIIVCNKGSVTAFCVLYGLAACLALGSFTLAFALAKNLPDAFNEAKFTFSMLVFFSVWVTFPLVYHSTGKVMVAVEIFAILASSAGMLGCFAPKVIYIILMRPVNSTQIKIEKESYF  
>Mouse, locus208.1  
CVNCEYQYANTEQNKCIQKGVTFSLYEDPLGMLALMAFCFAFTAVLVCVFKHHDTPVIVKANRSLYSILLLSMSCFLCSFFFIGHNPRATCVLQITFIVTAVSTVLAKTVTVLAFKVDTPGRRLNLFVSGTPNYIPII  
CSLLQCLSAITLWLEVPDFVIDEHSOQHIIIVCNKGSVTAFCVLYGLAACLALGSFTLAFALAKNLPDAFNEAKFTFSMLVFFSVWVTFPLVYHSTGKVMVAVEIFAILASSAGMLGCFAPKVIYIILMRPVNSTQIKIEKESYF  
>Mouse, locus150.1  
CVNCEYQYANTEQNKCIQKGVTFSLYEDPLGMLALMAFCFAFTAVLVCVFKHHDTPVIVKANRSLYSILLLSMSCFLCSFFFIGHNPRATCVLQITFIVTAVSTVLAKTVTVLAFKVDTPGRRLNLFVSGTPNYIPII  
CSLLQCLSAITLWLEVPDFVIDEHSOQHIIIVCNKGSVTAFCVLYGLAACLALGSFTLAFALAKNLPDAFNEAKFTFSMLVFFSVWVTFPLVYHSTGKVMVAVEIFAILASSAGMLGCFAPKVIYIILMRPVNSTQIKIEKESYF  
>Mouse, locus159.1  
CVNCEYQYANTEQNKCIQKGVTFSLYEDPLGMLALMAFCFAFTAVLVCVFKHHDTPVIVKANRSLYSILLLSMSCFLCSFFFIGHNPRATCVLQITFIVTAVSTVLAKTVTVLAFKVDTPGRRLNLFVSGTPNYIPII  
CSLLQCLSAITLWLEVPDFVIDEHSOQHIIIVCNKGSVTAFCVLYGLAACLALGSFTLAFALAKNLPDAFNEAKFTFSMLVFFSVWVTFPLVYHSTGKVMVAVEIFAILASSAGMLGCFAPKVIYIILMRPVNSTQIKIEKESYF  
>Mouse, locus126.1  
CVNCEYQYANTEQNKCIQKGVTFSLYEDPLGMLALMAFCFAFTAVLVCVFKHHDTPVIVKANRSLYSILLLSMSCFLCSFFFIGHNPRATCVLQITFIVTAVSTVLAKTVTVLAFKVDTPGRRLNLFVSGTPNYIPII  
CSLLQCLSAITLWLEVPDFVIDEHSOQHIIIVCNKGSVTAFCVLYGLAACLALGSFTLAFALAKNLPDAFNEAKFTFSMLVFFSVWVTFPLVYHSTGKVMVAVEIFAILASSAGMLGCFAPKVIYIILMRPVNSTQIKIEKESYF  
>Mouse, locus133.1  
CVNCEYQYANTEQNKCIQKGVTFSLYEDPLGMLALMAFCFAFTAVLVCVFKHHDTPVIVKANRSLYSILLLSMSCFLCSFFFIGHNPRATCVLQITFIVTAVSTVLAKTVTVLAFKVDTPGRRLNLFVSGTPNYIPII  
CSLLQCLSAITLWLEVPDFVIDEHSOQHIIIVCNKGSVTAFCVLYGLAACLALGSFTLAFALAKNLPDAFNEAKFTFSMLVFFSVWVTFPLVYHSTGKVMVAVEIFAILASSAGMLGCFAPKVIYIILMRPVNSTQIKIEKESYF  
>Mouse, locus183.1  
CVNCEYQYANTEQNKCIQKGVTFSLYEDPLGMLALMAFCFAFTAVLVCVFKHHDTPVIVKANRSLYSILLLSMSCFLCSFFFIGHNPRATCVLQITFIVTAVSTVLAKTVTVLAFKVDTPGRRLNLFVSGTPNYIPII  
CSLLQCLSAITLWLEVPDFVIDEHSOQHIIIVCNKGSVTAFCVLYGLAACLALGSFTLAFALAKNLPDAFNEAKFTFSMLVFFSVWVTFPLVYHSTGKVMVAVEIFAILASSAGMLGCFAPKVIYIILMRPVNSTQIKIEKESYF  
>Western\_c\_lawed\_frog, locus457.1

MISSPVPLFLLGIFCYKTPVIVRANNYSCLLILLSLFCLFCLSGFIGYPOPEKLLRQVAFGMVAFALCISCVLAKTITVIAFNATKPNRKRKMTGVRVSYCVIGICVLQILFVWLLVSPFPPEYDTGKPGIIVCNQEGSPTAFWMLGYLGLAMISFIVAFLARLNDPWFNEAKITFSMLAFSLVWVSFIPAYLSARGMYTVAEVEIFAILSSWAVGVCIFVPCYIIVLFPKNVSRKHILGK-->Coelacanth, locus377.1  
CQKRDDEWSENERHDECPKLIIDYLSYELMGTIFAVISLSLTFPALIYTFIKYRDTPLVKNPNREISYLLVGLMLSLFCLSLFIGRPTVTCMMRQTVFGIIFALFVSCVLAKTIMVIAFNATKPNMMLKWKVWPKLSISIVFV  
CTVIQISICIAWLSAPPPEKDMKSGIOMIIGNEGSTAFWCVLGYMLLAIISFIVAFLARLNDPWFNEAKITFSMLIFVSWVLAIFAPYVSTRGKYMVAEVEIFAILASSGTLCTIFCSKCYIILLMSDRNTEYLLGKGTK  
>Western\_c\_lawed\_frog, locus494.1  
CHPCSMOTWMLQDRCLPRTEFLSYDPLGYSLAAISFSSLPLGLVGFVHQQKTPVIVRANNYSCLLILLSLFCLFCLSGFIGYPOPEKLLRQVAFGMVAFALCISCVLAKTITVIAFNATKPNRKRKMTGVRVSYCVIGICVLQILFVWLLVSPFPPEYDTGKPGIIVCNQEGSPTAFWMLGYLGLAMISFIVAFLARLNDPWFNEAKITFSMLAFSLVWVSFIPAYLSARGMYTVAEVEIFAILSSWAVGVCIFVPCYIIVLFPKNVSRKHILGK-->Western\_c\_lawed\_frog, locus417.1  
CFPCTAETWPNDRTECLPKPVDLFEELGITTICTTIFSSFTLTLCLVIFRYKDTAIVKANRDLTYLLVGLMLSLFCLSLFIGRPTVTCMMRQTVFGIIFALFVSCVLAKTIMVIAFNATKPNMMLKWKVWPKLSISIVFV  
CTNLQILFVWLLVSPFPPEYDTGKPGIIVCNQEGSPTAFWMLGYLGLAMISFIVAFLARLNDPWFNEAKITFSMLIFVSWVLAIFAPYVSTRGKYMVAEVEIFAILASSGTLCTIFCSKCYIILLMSDRNTEYLLGKGTK  
>Spotted\_gar, locus137.1

MGIIISAVSLGSCFTIAVASIFVYRNTPVIVKANSELSFLLVSLKLCFLCVLLFIPGQPLWTRCLRHAVFGISFVLCISSILVKTMMVIAVFKSSRPGKSMKWFQSHQQRCTVLTALQVVICAVLWNASPKPKYNNQYTSKIVYECTISVGVFAMLLGYIGLAAVFSFLAFLARLNDPWFNEAKITFSMLIFCAVWITFIPAYISSPGKYTVAVEIFAILASSFGLLAAIFAPKCYIILLPERNTKKAINGRA-->Mouse, locus191.1  
CVNCEYQYANTEQNKCIQKGVTFSLYEDPLGMLALMAFCFAFTAVLVCVFKHHDTPVIVKANRSLYSILLLSMSCFLCSFFFIGHNPRATCVLQITFIVTAVSTVLAKTVTVLAFKVDTPGRRLNLFVSGTPNYIPII  
CSLLQCLSAITLWLEVPDFVIDEHSOQHIIIVCNKGSVTAFCVLYGLAACLALGSFTLAFALAKNLPDAFNEAKFTFSMLVFFSVWVTFPLVYHSTGKVMVAVEIFAILASSAGMLGCFAPKVIYIILMRPVNSTQIKIEKESYF  
>Brownbanded\_bambooshark, locus520.1  
CIQCPEDYNSNREDCVHKIEYGLYNDPLGALIALSIFGACVATAIAYLIRKDTALVKANNGLSFLVLSVICFLSSVVFVGEVPAWSCMTRQVLLAISFATCLSCMLSKAVNMLKARKTKPEDTEKFLSPQQRIIALI  
FVSHACLCAWLLIIPYVKNQTSQNIKIIMECNEGSVFLCCVLYGDLALAAICFVAFIARLNDPWFNEAKITFSMLIFVSWVLAIFAPYVSTRGKYMVAEVEIFAILASSGTLCTIFCSKCYIILLMSDRNTEYLLGKGTK  
>Whale\_shark, locus98.1

MALIALSIFGACVAAAIAYVLRKDTALVKANNRGLSFVLLFSLVICFLSSVVFVGEVPAWSCMTRQVLLAISFATCLSCMLSKAVNMLKARKTKPEGTEKFLSPQQRIIALIFVSHACLCAWLLIIPYVKNQTSQNIKIIMECNEGSVFLCCVLYGDLALAAICFVAFIARLNDPWFNEAKITFSMLIFVSWVLAIFAPYVSTRGKYMVAEVEIFAILASSGTLCTIFCSKCYIILLMSDRNTEYLLGKGTK  
>Great\_white\_shark, locus11.1

MTLIALSIFGACTAAAIAYVYRNTALVKANNRGLSFVLLFSLVICFLSSVVFVGEVPAWSCMTRQVLLAISFATCLSCMLSKAVNMLKARKTKPEGTEKFLSPQQRIIALIFVSHACLCAWLLIIPYVKNQTSQNIKIIMECNEGSVFLCCVLYGDLALAAICFVAFIARLNDPWFNEAKITFSMLIFVSWVLAIFAPYVSTRGKYMVAEVEIFAILASSGTLCTIFCSKCYIILLMSDRNTEYLLGKGTK  
>Cloudy\_catshark, locus79.1

MALIALSIFGACTAAAIAYVYRNTALVKANNRGLSFVLLFSLVICFLSSVVFVGEVPAWSCMTRQVLLAISFATCLSCMLSKAVNMLKARKTKPEGTEKFLSPQQRIIALIFVSHACLCAWLLIIPYVKNQTSQNIKIIMECNEGSVFLCCVLYGDLALAAICFVAFIARLNDPWFNEAKITFSMLIFVSWVLAIFAPYVSTRGKYMVAEVEIFAILASSGTLCTIFCSKCYIILLMSDRNTEYLLGKGTK  
>Thorny\_skate, locus23.1

EGGGKGLGPHQORMLTVSLTCHACLTAWLLIFPPYIKNTLSQNIKIIMECNEGSVFLCCVLYGDLALAAICFVAFIARLNDPWFNEAKITFSMLIFVSWVLAIFAPYVSTRGKYMVAEVEIFAILASSGTLCTIFCSKCYIILLMSDRNTEYLLGKGTK  
>Little\_skate, locus49.1  
CIQCPEDYNSNREDCVHKIEYGLYNDPLGALIALSIFGACVATAIAYLIRKDTALVKANNRGLSFVLLFSLVICFLSSVVFVGEVPAWSCMTRQVLLAISFATCLSCMLSKAVNMLKARKTKPEGTEKFLSPQQRIIALI  
FTLCHACLTAWLLIFPPYIKNTLSQNIKIIMECNEGSVFLCCVLYGDLALAAICFVAFIARLNDPWFNEAKITFSMLIFVSWVLAIFAPYVSTRGKYMVAEVEIFAILASSGTLCTIFCSKCYIILLMSDRNTEYLLGKGTK  
>Elephant\_shark, locus27.1  
CIECLEYDYSNREDCVHKIEYGLYNDPLGALIALSIFGACVATAIAYLIRKDTALVKANNRGLSFVLLFSLVICFLSSVVFVGEVPAWSCMTRQVLLAISFATCLSCMLSKAVNMLKARKTKPEGTEKFLSPQQRIIALI  
FIFCHACLCAWLLIFPPYIKNTLSQNIKIIMECNEGSVFLCCVLYGDLALAAICFVAFIARLNDPWFNEAKITFSMLIFVSWVLAIFAPYVSTRGKYMVAEVEIFAILASSGTLCTIFCSKCYIILLMSDRNTEYLLGKGTK  
>Small-eyed\_rabbitfish, locus110.1  
CIECLEYDYSNREDCVHKIEYGLYNDPLGALIALSIFGACVATAIAYLIRKDTALVKANNRGLSFVLLFSLVICFLSSVVFVGEVPAWSCMTRQVLLAISFATCLSCMLSKAVNMLKARKTKPEGTEKFLSPQQRIIALI  
FIFCHACLCAWLLIFPPYIKNTLSQNIKIIMECNEGSVFLCCVLYGDLALAAICFVAFIARLNDPWFNEAKITFSMLIFVSWVLAIFAPYVSTRGKYMVAEVEIFAILASSGTLCTIFCSKCYIILLMSDRNTEYLLGKGTK  
>Reedfish, locus27509.1

MGITLTAASAVCLSVIVLVSFIHYRHTPVIVKANSELSFLLVSLTCLFCLSTFIGHPTLTKLRHLFGISFVLCISSILVKTMMVIAVFKSSRPGKSMKWFQSHQQRCTVLTALQVVICAVLWNASPKPKYNNQYTSKIVYECTISVGVFAMLLGYIGLAAVFSFLAFLARLNDPWFNEAKITFSMLIFCAVWITFIPAYISSPGKYTVAVEIFAILASSFGLLAAIFAPKCYIILLPERNTKKAINGRA-->Reedfish, locus27509.1



>Reedfish. locus27468.1

MGITLTATAIFGSCLSVSVLIVFIYRNTPVVKANNSELSFLLLSLTLCLFCLSCFIFGEPNSASCTLRHVVFISVFLSICISILVKTIVVIMAFKATLPGNNMMKWFVGTQQRGTVMFTFIQSLICVWLTSAFFPFSKNTKHQNSK  
VILECDVGLSGFSCLLGIGLACISFVLAFLARLNPDTFNEAKITFSMLIFCAVWVIFIPAYISSPGKYTVAVEIFAILASSFGLLGAIFAPKCYIILFKPERNTKALMGR---

>Reedfish. locus27482.1

MKQIEFLSYEETMGIIAASAI FGSSLSFVGLVIVFVYRHTPVVKANNSELSFLLVLSLCLFCLSCFIFGQPSQNLCLRHIMFGVSVFLCISILVKTIVVIMAFKATLPGNNMMKWFVGAOQRGTVFLFTFIQSIICIIWLITAPP  
APSKNTKYQNAKIIIECDIGSVTGFSLGIGLGLSLVCFVLAFLARLNPDTFNEAKITFSMLIFCAVWVIFIPAYISSPGKYTVAVEIFAILASSFGLLMAIFAPKCYIILFKPERNTKVMGRYDK---

>Reedfish. locus27487.1

MKQIEFLSYEETMGIIAASAI FGSSLSFVGLVIVFVYRHTPVVKANNSELSFLLVLSLCLFCLSCFIFGQPSQNLCLRHIMFGVSVFLCISILVKTIVVIMAFKATLPGNNMMKWFVGAOQRGTVFIQSIICIIWLITAPP  
APSKNTKYQNAKIIIECDIGSVTGFSLGIGLGLSLVCFVLAFLARLNPDTFNEAKITFSMLIFCAVWVIFIPAYISSPGKYTVAVEIFAILASSFGLLMAIFAPKCYIILFKPERNTKVMGRYDK---

>Reedfish. locus27491.1

MCLMKQIEFLSYEETMGIIAASAI FGSSLSFVGLVIVFVYRHTPVVKANNSELSFLLVLSLCLFCLSCFIFGQPSQNLCLRHIMFGVSVFLCISILVKTIVVIMAFKATLPGNNMMKWFVGAOQRGTVFIQSIICIIWLITAPP  
IFECQVSGVTFGSCLLGIGLACFCFALAFARLNPDTFNEAKITFSMLIFCAVWVIFIPAYISSPGKYTVAVEIFAILASSFGLLMAIFAPKCYIILFKPERNTKRALMGRGA---

>Reedfish. locus40381.1

MGIALTSLAALGMCVSVLAVFIHFRRETAVVKANNSELSYLLVLSLCLFCLSCFFIGEPHSVTRCLRHVAFGISVFLCISILVKTIVVIMAFKATLPGNNRIMKWFVGAOQRGTVFFTSVETLICIILWLVIAAPPVPAKNTNHEHSK  
IILECYVSGITGFCVGLGYIFFLACICFALAFARLNPDSFNEAKITFSMLIFLAWVIAFIPAYVSSPGKYTVAVEIFAILASSFGLLTAIFTPKCYIILKPELNKRSLMGRIN

>Reedfish. locus40378.1

MGITLTTIAALGICVSVLAVFIHFRRETAVVKANNSELSYLLVLSLCLFCLSCFFIGEPHSVTRCLRHVAFGISVFLCISILVKTIVVIMAFKATLPGNNRIMKWFVGAOQRGTVFFTSVETLICIILWLVIAAPPVPAKNTNHEHSK  
IILECNVSGVTFGACVGLGYIFFLACVCFVLAFLARLNPDSFNEAKITFSMLIFLAWVIAFIPAYVSSPGKYTVAVEIFAILASSFGLLTAIFTPKCYIILKPELNKRSLMGRSTN

>Reedfish. locus27478.1

MGITLTTTALFGSCLSLVGLVFLYRNTPVVKANNSELSFLLLALNCLFCLSCFIFGQPSQNLCLRHVLFGISFALCISILVKTIVVIMAFKATLPGNNMMKWFVGAOQRGTVFTFIQSIICIIWLITAPPVPAKNTNYQNTK  
IILECNVSGLMGFFLLGYIGLACVCFVLAFLARLNPDSFNEAKITFSMLIFCAVWVIFIPAYISSPGKYTVAVEIFAILASSFGLLVAIFAPKCYIILFKPERNTKALMGRVAVT

>Reedfish. locus27457.1

MEYWSYERNKCVIREVEFLSYEDAMGITLSTALFGAELSVGLVAVFIHHRNTPPVKANNSELSFLLVLSLCLFCLSCFIFGKPSDLTCLRHRMFGVSVFLCISILVKTIVVIMAFKATLPGNNMMKWFVGAOQRSTVFFCTFIQ  
SLVCTWMLTAPPVPAKIPFTQFALIFECNVGSLTGFSCLLGIGLGLASLFCVLAFLARLNPDSFNEAKITFSMLIFCAVWVIFIPAYISSPGKYTVAVEIFAILASSFGLLVAIFAPKCYIILFKPERNTKAMMSRTLS

>Sterlet. locus293.1

MGISLMTIALFGAGLSVGLVFIYRNTPVVKANNSELSFLLVLSLCLFCLSCFIFGQPTNLTCLRHRVFGISVFLCISILVKTIVVIMAFKATLPGNNMMKWFVGAOQRGTVFTFIQVVICIWLITAPPVPAKNTNYQNTK  
IIFECNAGSFTGYSCLLGYIGLACTCFALFAFARLNPDSFNEAKITFSMLIFCAVWVIFIPAYISSPGKYTVAVEIFAILASSFGLLVAIFAPKCYIILFKPERNTKALMGRVAVT

>marker. zebrafish\_16\_13\_F

CPYEFWSNKEKDYCVKQVEFLSYEDPLGISLTTASLLGTCFALVMVIFSHHNTPIVRANNSELSFLLVLSLCLFCLVLLFIGQPQLWTCQLRYAVFGISVFLSVCSILVKTIVVIMAFKATLPGNNMMKWFVGAOQRGTVFTFIQVVICIWLITAPPVPAKNTNYQNTK  
IIVVICIWLITAPPVPAKIPFTQFALIFECNVGSLTGFSCLLGIGLGLASLFCVLAFLARLNPDSFNEAKITFSMLIFCAVWVIFIPAYISSPGKYTVAVEIFAILASSFGLLVAIFAPKCYIILFKPERNTKALMGRVAVT

>Zebrafish. locus531.1

CLVCPYEFWSNKEKDYCVKQVEFLSYEDPLGISLTTASLLGTCFALVMVIFSHHNTPIVRANNSELSFLLVLSLCLFCLVLLFIGQPQLWTCQLRYAVFGISVFLSVCSILVKTIVVIMAFKATLPGNNMMKWFVGAOQRGTVFTFIQVVICIWLITAPPVPAKNTNYQNTK  
IIVVICIWLITAPPVPAKIPFTQFALIFECNVGSLTGFSCLLGIGLGLASLFCVLAFLARLNPDSFNEAKITFSMLIFCAVWVIFIPAYISSPGKYTVAVEIFAILASSFGLLVAIFAPKCYIILFKPERNTKALMGRVAVT

>Zebrafish. locus530.1

CTVCPDEFWSNKEKDYCVKQVEFLSYEDPLGISLTTASLLGTCFALVMVIFSHHNTPIVRANNSELSFLLVLSLCLFCLVLLFIGQPQLWTCQLRYAVFGISVFLSVCSILVKTIVVIMAFKATLPGNNMMKWFVGAOQRGTVFTFIQVVICIWLITAPPVPAKNTNYQNTK  
IIVVICIWLITAPPVPAKIPFTQFALIFECNVGSLTGFSCLLGIGLGLASLFCVLAFLARLNPDSFNEAKITFSMLIFCAVWVIFIPAYISSPGKYTVAVEIFAILASSFGLLVAIFAPKCYIILFKPERNTKALMGRVAVT

>marker. zebrafish\_16\_12\_F

CPDEFWSNKEKDYCVKQVEFLSYEDPLGISLTTASLLGTCFALVMVIFSHHNTPIVRANNSELSFLLVLSLCLFCLVLLFIGQPQLWTCQLRYAVFGISVFLSVCSILVKTIVVIMAFKATLPGNNMMKWFVGAOQRGTVFTFIQVVICIWLITAPPVPAKNTNYQNTK  
IIVVICIWLITAPPVPAKIPFTQFALIFECNVGSLTGFSCLLGIGLGLASLFCVLAFLARLNPDSFNEAKITFSMLIFCAVWVIFIPAYISSPGKYTVAVEIFAILASSFGLLVAIFAPKCYIILFKPERNTKALMGRVAVT

>marker. zebrafish\_16\_11\_F

CPDEFWSNKEKDYCVKQVEFLSYEDPLGISLTTASLLGTCFALVMVIFSHHNTPIVRANNSELSFLLVLSLCLFCLVLLFIGQPQLWTCQLRYAVFGISVFLSVCSILVKTIVVIMAFKATLPGNNMMKWFVGAOQRGTVFTFIQVVICIWLITAPPVPAKNTNYQNTK  
IIVVICIWLITAPPVPAKIPFTQFALIFECNVGSLTGFSCLLGIGLGLASLFCVLAFLARLNPDSFNEAKITFSMLIFCAVWVIFIPAYISSPGKYTVAVEIFAILASSFGLLVAIFAPKCYIILFKPERNTKALMGRVAVT

>marker. zebrafish\_16\_10\_F

CPDEFWSNKEKDYCVKQVEFLSYEDPLGISLTTASLLGTCFALVMVIFSHHNTPIVRANNSELSFLLVLSLCLFCLVLLFIGQPQLWTCQLRYAVFGISVFLSVCSILVKTIVVIMAFKATLPGNNMMKWFVGAOQRGTVFTFIQVVICIWLITAPPVPAKNTNYQNTK  
IIVVICIWLITAPPVPAKIPFTQFALIFECNVGSLTGFSCLLGIGLGLASLFCVLAFLARLNPDSFNEAKITFSMLIFCAVWVIFIPAYISSPGKYTVAVEIFAILASSFGLLVAIFAPKCYIILFKPERNTKALMGRVAVT

>marker. zebrafish\_16\_9\_F

CPDEFWSNKEKDYCVKQVEFLSYEDPLGISLTTASLLGTCFALVMVIFSHHNTPIVRANNSELSFLLVLSLCLFCLVLLFIGQPQLWTCQLRYAVFGISVFLSVCSILVKTIVVIMAFKATLPGNNMMKWFVGAOQRGTVFTFIQVVICIWLITAPPVPAKNTNYQNTK  
IIVVICIWLITAPPVPAKIPFTQFALIFECNVGSLTGFSCLLGIGLGLASLFCVLAFLARLNPDSFNEAKITFSMLIFCAVWVIFIPAYISSPGKYTVAVEIFAILASSFGLLVAIFAPKCYIILFKPERNTKALMGRVAVT

>marker. zebrafish\_16\_8aa

CPDEFWSNKEKDYCVKQVEFLSYEDPLGISLTTASLLGTCFALVMVIFSHHNTPIVRANNSELSFLLVLSLCLFCLVLLFIGQPQLWTCQLRYAVFGISVFLSVCSILVKTIVVIMAFKATLPGNNMMKWFVGAOQRGTVFTFIQVVICIWLITAPPVPAKNTNYQNTK  
IIVVICIWLITAPPVPAKIPFTQFALIFECNVGSLTGFSCLLGIGLGLASLFCVLAFLARLNPDSFNEAKITFSMLIFCAVWVIFIPAYISSPGKYTVAVEIFAILASSFGLLVAIFAPKCYIILFKPERNTKALMGRVAVT

>marker. cichlid\_16-8aa

CPDEFWSNKEKDYCVKQVEFLSYEDPLGISLTTASLLGTCFALVMVIFSHHNTPIVRANNSELSFLLVLSLCLFCLVLLFIGQPQLWTCQLRYAVFGISVFLSVCSILVKTIVVIMAFKATLPGNNMMKWFVGAOQRGTVFTFIQVVICIWLITAPPVPAKNTNYQNTK  
IIVVICIWLITAPPVPAKIPFTQFALIFECNVGSLTGFSCLLGIGLGLASLFCVLAFLARLNPDSFNEAKITFSMLIFCAVWVIFIPAYISSPGKYTVAVEIFAILASSFGLLVAIFAPKCYIILFKPERNTKALMGRVAVT

>marker. cichlid\_16-4aa

CPDEFWSNKEKDYCVKQVEFLSYEDPLGISLTTASLLGTCFALVMVIFSHHNTPIVRANNSELSFLLVLSLCLFCLVLLFIGQPQLWTCQLRYAVFGISVFLSVCSILVKTIVVIMAFKATLPGNNMMKWFVGAOQRGTVFTFIQVVICIWLITAPPVPAKNTNYQNTK  
IIVVICIWLITAPPVPAKIPFTQFALIFECNVGSLTGFSCLLGIGLGLASLFCVLAFLARLNPDSFNEAKITFSMLIFCAVWVIFIPAYISSPGKYTVAVEIFAILASSFGLLVAIFAPKCYIILFKPERNTKALMGRVAVT

>marker. medaka\_16\_2\_F

CPDEFWSNKEKDYCVKQVEFLSYEDPLGISLTTASLLGTCFALVMVIFSHHNTPIVRANNSELSFLLVLSLCLFCLVLLFIGQPQLWTCQLRYAVFGISVFLSVCSILVKTIVVIMAFKATLPGNNMMKWFVGAOQRGTVFTFIQVVICIWLITAPPVPAKNTNYQNTK  
IIVVICIWLITAPPVPAKIPFTQFALIFECNVGSLTGFSCLLGIGLGLASLFCVLAFLARLNPDSFNEAKITFSMLIFCAVWVIFIPAYISSPGKYTVAVEIFAILASSFGLLVAIFAPKCYIILFKPERNTKALMGRVAVT

>marker. cichlid\_16-3aa

CPDEFWSNKEKDYCVKQVEFLSYEDPLGISLTTASLLGTCFALVMVIFSHHNTPIVRANNSELSFLLVLSLCLFCLVLLFIGQPQLWTCQLRYAVFGISVFLSVCSILVKTIVVIMAFKATLPGNNMMKWFVGAOQRGTVFTFIQVVICIWLITAPPVPAKNTNYQNTK  
IIVVICIWLITAPPVPAKIPFTQFALIFECNVGSLTGFSCLLGIGLGLASLFCVLAFLARLNPDSFNEAKITFSMLIFCAVWVIFIPAYISSPGKYTVAVEIFAILASSFGLLVAIFAPKCYIILFKPERNTKALMGRVAVT

>marker. cichlid\_16-1aa

CPDEFWSNKEKDYCVKQVEFLSYEDPLGISLTTASLLGTCFALVMVIFSHHNTPIVRANNSELSFLLVLSLCLFCLVLLFIGQPQLWTCQLRYAVFGISVFLSVCSILVKTIVVIMAFKATLPGNNMMKWFVGAOQRGTVFTFIQVVICIWLITAPPVPAKNTNYQNTK  
IIVVICIWLITAPPVPAKIPFTQFALIFECNVGSLTGFSCLLGIGLGLASLFCVLAFLARLNPDSFNEAKITFSMLIFCAVWVIFIPAYISSPGKYTVAVEIFAILASSFGLLVAIFAPKCYIILFKPERNTKALMGRVAVT

>marker. pufferfish\_16\_3\_Y

CPDEFWSNKEKDYCVKQVEFLSYEDPLGISLTTASLLGTCFALVMVIFSHHNTPIVRANNSELSFLLVLSLCLFCLVLLFIGQPQLWTCQLRYAVFGISVFLSVCSILVKTIVVIMAFKATLPGNNMMKWFVGAOQRGTVFTFIQVVICIWLITAPPVPAKNTNYQNTK  
IIVVICIWLITAPPVPAKIPFTQFALIFECNVGSLTGFSCLLGIGLGLASLFCVLAFLARLNPDSFNEAKITFSMLIFCAVWVIFIPAYISSPGKYTVAVEIFAILASSFGLLVAIFAPKCYIILFKPERNTKALMGRVAVT

>marker. fugu\_16\_1\_F

CPEDFWSSPQRDHCVPKTEFLSYHEPLGICLTAASLLGTIVSAVVLGFIHHRSTPVVRANSELSYQILVSLKLCFLCSSLFGRPRLWTCQRHAAGFISFVLCVSCILVKTMMVAVFRASKPGGATLKWFGAVQQRMTVIILTS  
IQAAICLWILLASPPHNTYQNSRIIEYECVAGSVGTGIFLLSYIGLALTLFLAFYSRKLPDSFNEAKLITFSMLIFCAVWVAFVPAVYVSSPGKYADAVEIFAILASSFGLLALFAPKCYIILLRPEKNTKAIMGRV---

>marker.fugu\_16\_4\_F

CPEDFWSSPQRDHCVPKTEFLSYHEPLGICLTAASLLGTIVSAVVLGFIHHRSTPVVRANSELSYQILVSLKLCFLCSSLFGRPRLWTCQRHAAGFISFVLCVSCILVKTMMVAVFRASKPGGATLKWFGAVQQRMTVIILTS  
VQAAICTAWLVSYSPPHNTYQNSRIIEYECVAGSVGTGIFLLSYIGLALTLFLAFYSRKLPDSFNEAKLITFSMLIFCAVWVAFVPAVYVSSPGKYADAVEIFAILASSFGLLALFAPKCYIILLRPEKNTKAIMGRV---

>marker.medaka\_16\_1\_F

CPEDFWSSQNDHCVPKTEFLSYDDPLGICLTAASLLGTIVSAVVLGFIHHRSTPVVRANSELSYQILVSLKLCFLCSSLFGRPRLWTCQRHAAGFISFVLCVSCILVKTMMVAVFRASKPGGATLKWFGAVQQRMTVIILTS  
VQAAICTAWLVSYSPPHNTYQNSRIIEYECVAGSVGTGIFLLSYIGLALTLFLAFYSRKLPDSFNEAKLITFSMLIFCAVWVAFVPAVYVSSPGKYADAVEIFAILASSFGLLALFAPKCYIILLRPEKNTKAIMGRV---

>Japanese\_eel, locus262.1

CYRCPVDFWNSQLRDRDHCVPKTEFLSYHEPLGICLTAASLLGTIVSAVVLGFIHHRSTPVVRANSELSYQILVSLKLCFLCSSLFGRPRLWTCQRHAAGFISFVLCVSCILVKTMMVAVFRASKPGGATLKWFGAVQQRMTVIILTS  
FTIIOAVICVAMLTAASPPVYKNTLRONSKIIEYECVAGSVGTGIFLLSYIGLALTLFLAFYSRKLPDSFNEAKLITFSMLIFCAVWVAFVPAVYVSSPGKYADAVEIFAILASSFGLLALFAPKCYIILLRPEKNTKAIMGRADAP

>Japanese\_eel, locus274.1

CYRCPVDFWNSQLRDRDHCVPKTEFLSYHEPLGICLTAASLLGTIVSAVVLGFIHHRSTPVVRANSELSYQILVSLKLCFLCSSLFGRPRLWTCQRHAAGFISFVLCVSCILVKTMMVAVFRASKPGGATLKWFGAVQQRMTVIILTS  
FTIIOAVICVAMLTAASPPVYKNTLRONSKIIEYECVAGSVGTGIFLLSYIGLALTLFLAFYSRKLPDSFNEAKLITFSMLIFCAVWVAFVPAVYVSSPGKYADAVEIFAILASSFGLLALFAPKCYIILLRPEKNTKAIMGRADAP

>Japanese\_eel, locus270.1

CYRCPVDFWNSQLRDRDHCVPKTEFLSYHEPLGICLTAASLLGTIVSAVVLGFIHHRSTPVVRANSELSYQILVSLKLCFLCSSLFGRPRLWTCQRHAAGFISFVLCVSCILVKTMMVAVFRASKPGGATLKWFGAVQQRMTVIILTS  
FTIIOAVICVAMLTAASPPVYKNTLRONSKIIEYECVAGSVGTGIFLLSYIGLALTLFLAFYSRKLPDSFNEAKLITFSMLIFCAVWVAFVPAVYVSSPGKYADAVEIFAILASSFGLLALFAPKCYIILLRPEKNTKAIMGRADAP

>Spotted\_gar, locus161.1

CFKCPQIEYWSNRSRQDCVPKTEFLSYHEPLGICLTAASLLGTIVSAVVLGFIHHRSTPVVRANSELSYQILVSLKLCFLCSSLFGRPRLWTCQRHAAGFISFVLCVSCILVKTMMVAVFRASKPGGATLKWFGAVQQRMTVIILTS  
FTVIOALICIIWLTASPPFKNTQYNSKIIEFCVAGSVGTGIFLLSYIGLALTLFLAFYSRKLPDSFNEAKLITFSMLIFCAVWVAFVPAVYVSSPGKYADAVEIFAILASSFGLLALFAPKCYIILLRPEKNTKAIMGRAAP

>Spotted\_gar, locus163.1

CLKCPDPPDFWNSRQDCVPKTEFLSYHEPLGICLTAASLLGTIVSAVVLGFIHHRSTPVVRANSELSYQILVSLKLCFLCSSLFGRPRLWTCQRHAAGFISFVLCVSCILVKTMMVAVFRASKPGGATLKWFGAVQQRMTVIILTS  
FTVIOALICIIWLTASPPFKNTQYNSKIIEFCVAGSVGTGIFLLSYIGLALTLFLAFYSRKLPDSFNEAKLITFSMLIFCAVWVAFVPAVYVSSPGKYADAVEIFAILASSFGLLALFAPKCYIILLRPEKNTKAIMGRAAP

>Spotted\_gar, locus154.1

CFKCPDPPDFWNSRQDCVPKTEFLSYHEPLGICLTAASLLGTIVSAVVLGFIHHRSTPVVRANSELSYQILVSLKLCFLCSSLFGRPRLWTCQRHAAGFISFVLCVSCILVKTMMVAVFRASKPGGATLKWFGAVQQRMTVIILTS  
FTVIOALICIIWLTASPPFKNTQYNSKIIEFCVAGSVGTGIFLLSYIGLALTLFLAFYSRKLPDSFNEAKLITFSMLIFCAVWVAFVPAVYVSSPGKYADAVEIFAILASSFGLLALFAPKCYIILLRPEKNTKAIMGRAAGL

>Spotted\_gar, locus166.1

MDYWSPPGRDQVCKTEFLSYHDPGLISLTTISFGACTSVGLIIFYYRNTPVVRANSELSYQILVSLKLCFLCSSLFGRPRLWTCQRHAAGFISFVLCVSCILVKTMMVAVFRASKPGGATLKWFGAVQQRMTVIILTS  
ALICIIWLTASPPFKNTQYNSKIIEFCVAGSVGTGIFLLSYIGLALTLFLAFYSRKLPDSFNEAKLITFSMLIFCAVWVAFVPAVYVSSPGKYADAVEIFAILASSFGLLALFAPKCYIILLRPEKNTKAIMGRAAP

>Reedfish, locus40365.1

MGIALTAVSLGSAAMLAVLAVIYRETPVVRANSELSYQILVSLKLCFLCSSLFGRPRLWTCQRHAAGFISFVLCVSCILVKTMMVAVFRASKPGGATLKWFGAVQQRMTVIILTS  
IIECDIGITGFSCLMVGIFLASICFLAVLAFARLNDPNEAKLITFSMLIFCAVWVAFVPAVYVSSPGKYADAVEIFAILASSFGLLALFAPKCYIILLRPEKNTKAIMGRAAP

>Mouse, locus124.1

CVNCPEYQYANTEQNKCIQKGVFTLSEYDPLGALALMAFCFAFTAVLVCFVGHKHTDPIVKNANRSLYLLMSLMFCFSFFIIGLPNRAICVLOQITGIVTAVSTVLAKTVLAVFKVDPGRRLNLFVSGTNYIPI  
CSLLOQVLCATLWAVSPPFVIDEHTLGHGIIIVCNKGSDFATYFCILGYLACLALGFSFLAFLAKLPDTPNEAKLITFSMLIFCAVWVAFVPAVYVSSPGKYADAVEIFAILASSFGLLALFAPKCYIILLRPEKNTKAIMGRAAP

>Western\_c\_lawed\_frog, locus847.1

CTKCPEDMWANEMHGDRCRDKTEFLSYHEPLGICLTAASLLGTIVSAVVLGFIHHRSTPVVRANSELSYQILVSLKLCFLCSSLFGRPRLWTCQRHAAGFISFVLCVSCILVKTMMVAVFRASKPGGATLKWFGAVQQRMTVIILTS  
CTAIQVITICAGWLHSSPPFQYDNKSKGIIIEVCNKGSPIAYSCIT-----KLPGSFNEAKLITFSMLIFGAVWVAFVPAVYVSSPGKYADAVEIFAILASSFGLLALFAPKCYIILLRPEKNTKAIMGRAAP

>Western\_c\_lawed\_frog, locus849.1

CTECPEDMWANEMHGDRCRDKTEFLSYHEPLGICLTAASLLGTIVSAVVLGFIHHRSTPVVRANSELSYQILVSLKLCFLCSSLFGRPRLWTCQRHAAGFISFVLCVSCILVKTMMVAVFRASKPGGATLKWFGAVQQRMTVIILTS  
CTAIQVITICAGWLHSSPPFQYDNKSKGIIIEVCNKGSPIAYSCIT-----KLPGSFNEAKLITFSMLIFGAVWVAFVPAVYVSSPGKYADAVEIFAILASSFGLLALFAPKCYIILLRPEKNTKAIMGRAAP

>Elephant\_shark, locus31.1

CTKCPEDMWANEMHGDRCRDKTEFLSYHEPLGICLTAASLLGTIVSAVVLGFIHHRSTPVVRANSELSYQILVSLKLCFLCSSLFGRPRLWTCQRHAAGFISFVLCVSCILVKTMMVAVFRASKPGGATLKWFGAVQQRMTVIILTS  
CTAIQVITICAGWLHSSPPFQYDNKSKGIIIEVCNKGSPIAYSCIT-----KLPGSFNEAKLITFSMLIFGAVWVAFVPAVYVSSPGKYADAVEIFAILASSFGLLALFAPKCYIILLRPEKNTKAIMGRAAP

>Sterlet, locus277.1

STGIQVITICAGWLHSSPPFQYDNKSKGIIIEVCNKGSPIAYSCIT-----KLPGSFNEAKLITFSMLIFGAVWVAFVPAVYVSSPGKYADAVEIFAILASSFGLLALFAPKCYIILLRPEKNTKAIMGRAAP

>Japanese\_eel, locus160.1

MGIIIVLIFSLGVCVTVLAVLFFKDKDPIVVRANSELSYQILVSLKLCFLCSSLFGRPRLWTCQRHAAGFISFVLCVSCILVKTMMVAVFRASKPGGATLKWFGAVQQRMTVIILTS  
IIECDIGITGFSCLMVGIFLASICFLAVLAFARLNDPNEAKLITFSMLIFCAVWVAFVPAVYVSSPGKYADAVEIFAILASSFGLLALFAPKCYIILLRPEKNTKAIMGRAAP

>Spotted\_gar, locus168.1

MEFLEFREPLGIVLTVLAVLGAVALSITGAFVHRDTPVVRANSELSYQILVSLKLCFLCSSLFGRPRLWTCQRHAAGFISFVLCVSCILVKTMMVAVFRASKPGGATLKWFGAVQQRMTVIILTS  
KNEAVTPKIEVCEQDAGSPALFCVLAAYTGFVAVLAFARLNDPNEAKLITFSMLIFCAVWVAFVPAVYVSSPGKYADAVEIFAILASSFGLLALFAPKCYIILLRPEKNTKAIMGRAAP

>Reedfish, locus27375.1

MCPEDFWNSRDRDHCVPKTEFLSYHEPLGICLTAASLLGTIVSAVVLGFIHHRSTPVVRANSELSYQILVSLKLCFLCSSLFGRPRLWTCQRHAAGFISFVLCVSCILVKTMMVAVFRASKPGGATLKWFGAVQQRMTVIILTS  
LVQIGICVGFHVPSSPVMNRDQYISKIIIECONEGPELALFCILGYLAVLAFARLNDPNEAKLITFSMLIFCAVWVAFVPAVYVSSPGKYADAVEIFAILASSFGLLALFAPKCYIILLRPEKNTKAIMGRAAP

>Japanese\_eel, locus165.1

CICQPEEYWSNRSRQDCVPKTEFLSYHEPLGICLTAASLLGTIVSAVVLGFIHHRSTPVVRANSELSYQILVSLKLCFLCSSLFGRPRLWTCQRHAAGFISFVLCVSCILVKTMMVAVFRASKPGGATLKWFGAVQQRMTVIILTS  
FTIIOALICIIWLTASPPFKNTQYNSKIIEFCVAGSVGTGIFLLSYIGLALTLFLAFYSRKLPDSFNEAKLITFSMLIFCAVWVAFVPAVYVSSPGKYADAVEIFAILASSFGLLALFAPKCYIILLRPEKNTKAIMGRAAP

>Western\_c\_lawed\_frog, locus431.1

MWPNKRDRCFLKPIEFLSYEDYLGITLATISFSSMVPISVFRLLIHYKSTPIVRANNSVSCILLVLSFCFLCALAFIGYPOPEKCLLROAAFGVFTLVCVSCILAKTVIVVAFMATKPGSSLLKWTTPRVPYMIITCTFIQLT  
LCIFWLSISPPFPQYNEAKPGIIVVECNENSQFAFWCMLGYLGLAVSFTVAFARLNDPNEAKLITFSMLAFSLVWVYFIPASLSAQGYTVAMEIFAILTSSWALVFCMFLPKCFIILFRPDMNSRDLNMGKRS

>Western\_c\_lawed\_frog, locus432.1

MWPNKRDRCFLKPIEFLSYEDYLGITLATISFSSMVPISVFRLLIHYKSTPIVRANNSVSCILLVLSFCFLCALAFIGYPOPEKCLLROAAFGVFTLVCVSCILAKTVIVVAFMATKPGSSLLKWTTPRVPYMIITCTFIQLT  
LCIFWLSISPPFPQYNEAKPGIIVVECNENSQFAFWCMLGYLGLAVSFTVAFARLNDPNEAKLITFSMLAFSLVWVYFIPASLSAQGYTVAMEIFAILTSSWALVFCMFLPKCFIILFRPDMNSRDLNMGKRS

>Western\_c\_lawed\_frog, locus429.1

MWPNKRDRCFLKPIEFLSYEDYLGITLATISFSSMVPISVFRLLIHYKSTPIVRANNSVSCILLVLSFCFLCALAFIGYPOPEKCLLROAAFGVFTLVCVSCILAKTVIVVAFMATKPGSSLLKWTTPRVPYMIITCTFIQLT  
LCIFWLSISPPFPQYNEAKPGIIVVECNENSQFAFWCMLGYLGLAVSFTVAFARLNDPNEAKLITFSMLAFSLVWVYFIPASLSAQGYTVAMEIFAILTSSWALVFCMFLPKCFIILFRPDMNSRDLNMGKRS

>Western\_c\_lawed\_frog, locus433.1

MWPNKRDRCFLKPIEFLSYEDYLGITLATISFSSMVPISVFRLLIHYKSTPIVRANNSVSCILLVLSFCFLCALAFIGYPOPEKCLLROAAFGVFTLVCVSCILAKTVIVVAFMATKPGSSLLKWTTPRVPYMIITCTFIQLT  
LCIFWLSISPPFPQYNEAKPGIIVVECNENSQFAFWCMLGYLGLAVSFTVAFARLNDPNEAKLITFSMLAFSLVWVYFIPASLSAQGYTVAMEIFAILTSSWALVFCMFLPKCFIILFRPDMNSRDLNMGKRS

>Western\_c\_lawed\_frog, locus436.1

MWPNKRDRCFLKPIEFLSYEDYLGITLATISFSSMVPISVFRLLIHYKSTPIVRANNSVSCILLVLSFCFLCALAFIGYPOPEKCLLROAAFGVFTLVCVSCILAKTVIVVAFMATKPGSSLLKWTTPRVPYMIITCTFIQLT  
LCIFWLSISPPFPQYNEAKPGIIVVECNENSQFAFWCMLGYLGLAVSFTVAFARLNDPNEAKLITFSMLAFSLVWVYFIPASLSAQGYTVAMEIFAILTSSWALVFCMFLPKCFIILFRPDMNSRDLNMGKRS

>Western\_c\_lawed\_frog, locus435.1

MWPNKRDRCFLKPIEFLSYEDYLGITLATISFSSMVPISVFRLLIHYKSTPIVRANNSVSCILLVLSFCFLCALAFIGYPOPEKCLLROAAFGVFTLVCVSCILAKTVIVVAFMATKPGSSLLKWTTPRVPYMIITCTFIQLT  
LCIFWLSISPPFPQYNEAKPGIIVVECNENSQFAFWCMLGYLGLAVSFTVAFARLNDPNEAKLITFSMLAFSLVWVYFIPASLSAQGYTVAMEIFAILTSSWALVFCMFLPKCFIILFRPDMNSRDLNMGKRS

>Western\_c\_lawed\_frog, locus434.1

MWPNKRDRCFLKPIEFLSYEDYLGITLATISFSSMVPISVFRLLIHYKSTPIVRANNSVSCILLVLSFCFLCALAFIGYPOPEKCLLROAAFGVFTLVCVSCILAKTVIVVAFMATKPGSSLLKWTTPRVPYMIITCTFIQLT  
LCIFWLSISPPFPQYNEAKPGIIVVECNENSQFAFWCMLGYLGLAVSFTVAFARLNDPNEAKLITFSMLAFSLVWVYFIPASLSAQGYTVAMEIFAILTSSWALVFCMFLPKCFIILFRPDMNSRDLNMGKRS

>Western\_c\_lawed\_frog, locus437.1

MWPNKRDRCFLKPIEFLSYEDYLGITLATISFSSMVPISVFRLLIHYKSTPIVRANNSVSCILLVLSFCFLCALAFIGYPOPEKCLLROAAFGVFTLVCVSCILAKTVIVVAFMATKPGSSLLKWTTPRVPYMIITCTFIQLT  
LCIFWLSISPPFPQYNEAKPGIIVVECNENSQFAFWCMLGYLGLAVSFTVAFARLNDPNEAKLITFSMLAFSLVWVYFIPASLSAQGYTVAMEIFAILTSSWALVFCMFLPKCFIILFRPDMNSRDLNMGKRS

>Western\_c\_lawed\_frog, locus438.1

MWPNKRDRCFLKPIEFLSYEDYLGITLATISFSSMVPISVFRLLIHYKSTPIVRANNSVSCILLVLSFCFLCALAFIGYPOPEKCLLROAAFGVFTLVCVSCILAKTVIVVAFMATKPGSSLLKWTTPRVPYMIITCTFIQLT  
LCIFWLSISPPFPQYNEAKPGIIVVECNENSQFAFWCMLGYLGLAVSFTVAFARLNDPNEAKLITFSMLAFSLVWVYFIPASLSAQGYTVAMEIFAILTSSWALVFCMFLPKCFIILFRPDMNSRDLNMGKRS

>Western\_c\_lawed\_frog, locus439.1

MWPNKRDRCFLKPIEFLSYEDYLGITLATISFSSMVPISVFRLLIHYKSTPIVRANNSVSCILLVLSFCFLCALAFIGYPOPEKCLLROAAFGVFTLVCVSCILAKTVIVVAFMATKPGSSLLKWTTPRVPYMIITCTFIQLT  
LCIFWLSISPPFPQYNEAKPGIIVVECNENSQFAFWCMLGYLGLAVSFTVAFARLNDPNEAKLITFSMLAFSLVWVYFIPASLSAQGYTVAMEIFAILTSSWALVFCMFLPKCFIILFRPDMNSRDLNMGKRS

>Western\_c\_lawed\_frog, locus441.1

MWPNKRDRCFLKPIEFLSYEDYLGITLATISFSSMVPISVFRLLIHYKSTPIVRANNSVSCILLVLSFCFLCALAFIGYPOPEKCLLROAAFGVFTLVCVSCILAKTVIVVAFMATKPGSSLLKWTTPRVPYMIITCTFIQLT  
LCIFWLSISPPFPQYNEAKPGIIVVECNENSQFAFWCMLGYLGLAVSFTVAFARLNDPNEAKLITFSMLAFSLVWVYFIPASLSAQGYTVAMEIFAILTSSWALVFCMFLPKCFIILFRPDMNSRDLNMGKRS

>Western\_c\_lawed\_frog, locus443.1

MWPNKRDRCFLKPIEFLSYEDYLGITLATISFSSMVPISVFRLLIHYKSTPIVRANNSVSCILLVLSFCFLCALAFIGYPOPEKCLLROAAFGVFTLVCVSCILAKTVIVVAFMATKPGSSLLKWTTPRVPYMIITCTFIQLT  
LCIFWLSISPPFPQYNEAKPGIIVVECNENSQFAFWCMLGYLGLAVSFTVAFARLNDPNEAKLITFSMLAFSLVWVYFIPASLSAQGYTVAMEIFAILTSSWALVFCMFLPKCFIILFRPDMNSRDLNMGKRS

>Western\_c\_lawed\_frog, locus442.1

MWPNKRDRCFLKPIEFLSYEDYLGITLATISFSSMVPISVFRLLIHYKSTPIVRANNSVSCILLVLSFCFLCALAFIGYPOPEKCLLROAAFGVFTLVCVSCILAKTVIVVAFMATKPGSSLLKWTTPRVPYMIITCTFIQLT  
LCIFWLSISPPFPQYNEAKPGIIVVECNENSQFAFWCMLGYLGLAVSFTVAFARLNDPNEAKLITFSMLAFSLVWVYFIPASLSAQGYTVAMEIFAILTSSWALVFCMFLPKCFIILFRPDMNSRDLNMGKRS

>Western\_c\_lawed\_frog, locus444.1

>Thorny\_skate, locus26.1  
--MKCPIDYWSNDRRACVPKQIEFLSFGESMGVTLMAISVCGACVTVGVAVFLRINTPVRANNSSELSFLLLSLMLCFLCSIAFIGOPTWPCAMRHTVFGISFVLCISCLSKTLVLMFAKATLPSNVNMRWFGPAQORSIVFI  
STLIQVIVCAVWLLTSPPPPTQNTQYOSAKIILECAVGSSTLAFCCAFYIGLLACILVLAFLGRALPDFKNEAKFITFSMLIFFAVWLTVPAYVTPGKYTVAVEIFAILASSFGLLFCIFPKCYIILKPEENTKKQMMGRAER  
>Little\_skate, locus54.1  
--MKCPIDYWSNDRRACVPKQIEFLSFGESMGVTLMAISVCGACVTVGVAVFLRINTPVRANNSSELSFLLLSLMLCFLCSIAFIGOPTWPCAMRHTVFGISFVLCISCLSKTLVLMFAKATLPSNVNMRWFGPAQORSIVFI  
STLIQVIVCAVWLLTSPPPPTQNTQYOSAKIILECAVGSSTLAFCCAFYIGLLACILVLAFLGRALPDFKNEAKFITFSMLIFFAVWLTVPAYVTPGKYTVAVEIFAILASSFGLLFCIFPKCYIILKPEENTKKQMMGRAER  
>Mouse, locus110.1  
CICKPEDQYPNKQNNCKPKIKFISLHEDTLGAVLVSLAISLAFSAMLGFLHYRDPVIVRANNRNLSYVLLVSLMLCFCCSLFIFIGQPTVTVLVRQIMFVGVVSVAVSAILAKTIVVVAFTAIPKSTLQMMVTRLSNAIVCC  
GSIIVQVICAVWLGTPPPFDADMHEFQGIILWNEGSTLAFYCVLGYLGLSLSLLIAFLARLPESFNEAKFITFSMLVFCVWITVFPVYLSKQKTMVAVEIFAILASSFGLLFCIFPKCYIILKPEENTKKQMMGRAER  
>marker, fugu\_4\_3\_FP

-----  
CSEEFWPNPERNACFLKPVFSLFNEVLGILAVFVSGGACLAIVTAAVFFHRRASPIVRANNSSELSFLLLSLMLCFLCSIAFIGOPTWPCAMRHTVFGISFVLCISCLSKTLVLMFAKATLPSNVNMRWFGPPQORMTVTFSTS  
IQVLCIWLVSPPFPVNRLLTYKERIILECALGSSVGFVAVLGYIGLAAVCLVLAFLARLPDNFNEAKFITFSMLIFCAVWITFIPAYVSSPGKYTVAVEIFAILASSFGLLFCIFAPKCYIILKPEKNSKXHLMNK--  
>Western\_c\_lawed\_frog, locus965.1  
CLNCPKDPKWSRKEECLPKIQFLSYEELGSAACISVFLCLLTFVFCFLIIRKRPVIVKANRRDLSYLLLSLMLFMCFLSIAFIGRNPIMCIRQVMFAVIFSLCVSTILAKTIVVMFISATNPDSKLLKVLGRIPYIVPV  
CTMVQVILCIWLLTADPAEAFNEAEIGIIVIECNEGSRVLFASVLYGMLGSLVSLFAFLARLPDNFNEAKFITFSMLIFCAVWITFIPAYVSSPGKYTVAVEIFAILASSFGLLFCIFAPKCYIILKPEKNTKQYIMG--  
>Sterlet, locus189.1

MGVTLTVIALFGAALTIGVLAFLHYKNTPIVRANNSSELSFLLLSLMLCFLCSIAFIGEIPANNSCFMRHTVFSITFSLCSICLKGTVVLMVFKATQPGSNIMKWFQIQRIMISACTSVQIICAIVLAMPFPPSKNTKYQSSK  
IILECDVGSSTLAFWCVLGYIGVLAFCMCFVLAFLARLPDNFNEAKFITFSMLIFCAVWITFIPAYVSSPGKYTVAVEIFAILASSFGLLFCIFAPKCYIILKPEKNTKQYIMG--  
>Sterlet, locus184.1

MGVTLTVIALFGAALTIGVLAFLHYKNTPIVRANNSSELSFLLLSLMLCFLCSIAFIGEIPANNSCFMRHTVFSITFSLCSICLKGTVVLMVFKATQPGSNIMKWFQIQRIMISACTSVQIICAIVLAMPFPPSKNTKYQSSK  
IILECDVGSSTLAFWCVLGYIGVLAFCMCFVLAFLARLPDNFNEAKFITFSMLIFCAVWITFIPAYVSSPGKYTVAVEIFAILASSFGLLFCIFAPKCYIILKPEKNTKQYIMG--  
>Sterlet, locus188.1

CIQCPVDFWNSAERTCEIPKEIEYLYT-  
DEMGVTLTVIALFGAALTIGVLAFLHYKNTPIVRANNSSELSFLLLSLMLCFLCSIAFIGEIPANNSCFMRHTVFSITFSLCSICLKGTVVLMVFKATQPGSNIMKWFQIQRIMISACTSVQIICAIVLAMPFPPSKNTKYQSSK  
SKIILECDVGSSTLAFWCVLGYIGVLAFCMCFVLAFLARLPDNFNEAKFITFSMLIFCAVWITFIPAYVSSPGKYTVAVEIFAILASSFGLLFCIFAPKCYIILKPEKNTKQYIMG--  
>Sterlet, locus183.1

CIQCPVDFWNSAERTCEIPKEIEYLYT-  
DEMGVTLTVIALFGAALTIGVLAFLHYKNTPIVRANNSSELSFLLLSLMLCFLCSIAFIGEIPANNSCFMRHTVFSITFSLCSICLKGTVVLMVFKATQPGSNIMKWFQIQRIMISACTSVQIICAIVLAMPFPPSKNTKYQSSK  
SKIILECDVGSSTLAFWCVLGYIGVLAFCMCFVLAFLARLPDNFNEAKFITFSMLIFCAVWITFIPAYVSSPGKYTVAVEIFAILASSFGLLFCIFAPKCYIILKPEKNTKQYIMG--  
>Sterlet, locus185.1

MGVTLTVIALFGAALTIGVLAFLHYKNTPIVRANNSSELSFLLLSLMLCFLCSIAFIGEIPANNSCFMRHTVFSITFSLCSICLKGTVVLMVFKATQPGSNIMKWFQIQRIMISACTSVQIICAIVLAMPFPPSKNTKYQSSK  
IILECDVGSSTLAFWCVLGYIGVLAFCMCFVLAFLARLPDNFNEAKFITFSMLIFCAVWITFIPAYVSSPGKYTVAVEIFAILASSFGLLFCIFAPKCYIILKPEKNTKQYIMG--  
>Sterlet, locus187.1

CIQCPVDFWNSAERTCEIPKEIEYLYT-  
DEMGVTLTVIALFGAALTIGVLAFLHYKNTPIVRANNSSELSFLLLSLMLCFLCSIAFIGEIPANNSCFMRHTVFSITFSLCSICLKGTVVLMVFKATQPGSNIMKWFQIQRIMISACTSVQIICAIVLAMPFPPSKNTKYQSSK  
SKIILECDVGSSTLAFWCVLGYIGVLAFCMCFVLAFLARLPDNFNEAKFITFSMLIFCAVWITFIPAYVSSPGKYTVAVEIFAILASSFGLLFCIFAPKCYIILKPEKNTKQYIMG--  
>Sterlet, locus182.1

MGVTLTVIALFGAALTIGVLAFLHYKNTPIVRANNSSELSFLLLSLMLCFLCSIAFIGEIPANNSCFMRHTVFSITFSLCSICLKGTVVLMVFKATQPGSNIMKWFQIQRIMISACTSVQIICAIVLAMPFPPSKNTKYQSSK  
IILECDVGSSTLAFWCVLGYIGVLAFCMCFVLAFLARLPDNFNEAKFITFSMLIFCAVWITFIPAYVSSPGKYTVAVEIFAILASSFGLLFCIFAPKCYIILKPEKNTKQYIMG--  
>Mouse, locus78.1

CVRCPDDKYANLEKTHCLQRASFLAYEDPLGMLGCMALFSLALTVLTVFKYKQDTPVIVKANRRISYLLLSLMLCFLCSIAFIGEIPANNSCFMRHTVFSITFSLCSICLKGTVVLMVFKATQPGSNIMKWFQIQRIMISACTSVQIICAIVLAMPFPPSKNTKYQSSK  
CTLIQVFCGZLVTPSPFIDRDTQSEYKGTIIICNKGSVIAFHVFLGYLGLSALGSGTVAFLARLPDRFNEAKFITFSMLVFCVSWITFLPVYHSTRGTVMVVEVFSILASSAGLGCIFLPCCKCIVLRLDSNFLOKHYKDLPS  
>Mouse, locus75.1

CVSCTGDKYANLEKTHCLQRASFLAYEDPLGMLGCMALFSLALTVLTVFKYKQDTPVIVKANRRISYLLLSLMLCFLCSIAFIGEIPANNSCFMRHTVFSITFSLCSICLKGTVVLMVFKATQPGSNIMKWFQIQRIMISACTSVQIICAIVLAMPFPPSKNTKYQSSK  
CTLIQVFCGZLVTPSPFIDRDTQSEYKGTIIICNKGSVIAFHVFLGYLGLSALGSGTVAFLARLPDRFNEAKFITFSMLVFCVSWITFLPVYHSTRGTVMVVEVFSILASSAGLGCIFLPCCKCIVLRLDSNFLOKHYKDLPS  
>Mouse, locus74.1

CVRCPDDKYANLEKTHCLQRASFLAYEDPLGMLGCMALFSLALTVLTVFKYKQDTPVIVKANRRISYLLLSLMLCFLCSIAFIGEIPANNSCFMRHTVFSITFSLCSICLKGTVVLMVFKATQPGSNIMKWFQIQRIMISACTSVQIICAIVLAMPFPPSKNTKYQSSK  
CTLIQVFCGZLVTPSPFIDRDTQSEYKGTIIICNKGSVIAFHVFLGYLGLSALGSGTVAFLARLPDRFNEAKFITFSMLVFCVSWITFLPVYHSTRGTVMVVEVFSILASSAGLGCIFLPCCKCIVLRLDSNFLOKHYKDLPS  
>Mouse, locus79.1

CVRCPDDKYANLEKTHCLQRASFLAYEDPLGMLGCMALFSLALTVLTVFKYKQDTPVIVKANRRISYLLLSLMLCFLCSIAFIGEIPANNSCFMRHTVFSITFSLCSICLKGTVVLMVFKATQPGSNIMKWFQIQRIMISACTSVQIICAIVLAMPFPPSKNTKYQSSK  
CTLIQVFCGZLVTPSPFIDRDTQSEYKGTIIICNKGSVIAFHVFLGYLGLSALGSGTVAFLARLPDRFNEAKFITFSMLVFCVSWITFLPVYHSTRGTVMVVEVFSILASSAGLGCIFLPCCKCIVLRLDSNFLOKHYKDLPS  
>Mouse, locus83.1

CVRCPDDKYANLEKTHCLQRASFLAYEDPLGMLGCMALFSLALTVLTVFKYKQDTPVIVKANRRISYLLLSLMLCFLCSIAFIGEIPANNSCFMRHTVFSITFSLCSICLKGTVVLMVFKATQPGSNIMKWFQIQRIMISACTSVQIICAIVLAMPFPPSKNTKYQSSK  
CTLIQVFCGZLVTPSPFIDRDTQSEYKGTIIICNKGSVIAFHVFLGYLGLSALGSGTVAFLARLPDRFNEAKFITFSMLVFCVSWITFLPVYHSTRGTVMVVEVFSILASSAGLGCIFLPCCKCIVLRLDSNFLOKHYKDLPS  
>Mouse, locus77.1

CMRCPDDKYANLEKTHCLQRASFLAYEDPLGMLGCMALFSLALTVLTVFKYKQDTPVIVKANRRISYLLLSLMLCFLCSIAFIGEIPANNSCFMRHTVFSITFSLCSICLKGTVVLMVFKATQPGSNIMKWFQIQRIMISACTSVQIICAIVLAMPFPPSKNTKYQSSK  
CTLIQVFCGZLVTPSPFIDRDTQSEYKGTIIICNKGSVIAFHVFLGYLGLSALGSGTVAFLARLPDRFNEAKFITFSMLVFCVSWITFLPVYHSTRGTVMVVEVFSILASSAGLGCIFLPCCKCIVLRLDSNFLOKHYKDLPS  
>Mouse, locus102.1

CFQCPEDHYNMRQDFIPKSLTFIIFEEALGTSALSSALLFCVTSVVLGFKHRDTPVIVKANRRISYLLLSLMLCFLCSIAFIGEIPANNSCFMRHTVFSITFSLCSICLKGTVVLMVFKATQPGSNIMKWFQIQRIMISACTSVQIICAIVLAMPFPPSKNTKYQSSK  
SLLIQTICTVWLTSPFPDQVMSAEVILKNEGSIIMFYCYLLGFMGFLSICSTAFARKLPDSFNEAKFITFSMLVFCVSWITFLPVYHSTRGTVMVVEVFSILASSAGLGCIFLPCCKCIVLRLDSNFLOKHYKDLPS  
>Mouse, locus307.1

CMKCPVDEYANTDQTCFKKVSFLDYEEPLGMLTAVLAVFVSSLTVILCFLKHRDTPVIVKANRRISYLLLSLMLCFLCSIAFIGEIPANNSCFMRHTVFSITFSLCSICLKGTVVLMVFKATQPGSNIMKWFQIQRIMISACTSVQIICAIVLAMPFPPSKNTKYQSSK  
CTTIQMLCGZLVTPSPFIDRDTQSEYKGTIIICNKGSVIAFHVFLGYLGLSALGSGTVAFLARLPDRFNEAKFITFSMLVFCVSWITFLPVYHSTRGTVMVVEVFSILASSAGLGCIFLPCCKCIVLRLDSNFLOKHYKDLPS  
>Reef fish, locus2727.1

MGVLLTIMISGASITLTVLTVFKYKQDTPVIVKANNSSELSFLLLSLMLCFLCSIAFIGOPLSWSMCLRHTAFGIFSVLVCISCVLKGTVVLMVFKATQPGSNIMKWFQIQRIMISACTSVQIICAIVLAMPFPPSKNTKYQSSK  
HYSGRVILECNVGSVLYGYSVLYGIFLACMCFVLAFLARLPDNFNEAKFITFSMLIFCAVWITFIPAYVSSPGKYTVAVEIFAILASSFGLLFCIFAPKCYIILKPEKNTKXHLMEKPA  
>Reef fish, locus40470.1

CMSCPISYRSNKEKNOICIKDTEFLSFEEMGSLVLLFALLGALMTISVAVIFILYDTPVIVRANNSSELSFLLLSLMLCFLCSIAFIGOPLSWSMCLRHTAFGIFSVLVCISCVLKGTVVLMVFKATQPGSNIMKWFQIQRIMISACTSVQIICAIVLAMPFPPSKNTKYQSSK  
FTLTQVICTFWLFLSPPPHNFNTSYKEKIIILECEVGSIVAFVCLGYIGLSAVCFVLAFLARLPDNFNEAKFITFSMLIFCSVWITFIPAYVSSPGKYTVAVEIFAILASSFGLLFCIFPKCYIILKPEKNTKXHLMEKPA  
>Reef fish, locus40462.1

CMSCPISYRSNKEKNOICIKDTEFLSFEEMGSLVLLFALLGALMTISVAVIFILYDTPVIVRANNSSELSFLLLSLMLCFLCSIAFIGOPLSWSMCLRHTAFGIFSVLVCISCVLKGTVVLMVFKATQPGSNIMKWFQIQRIMISACTSVQIICAIVLAMPFPPSKNTKYQSSK  
FTLTQVICTFWLFLSPPPHNFNTSYKEKIIILECEVGSIVAFVCLGYIGLSAVCFVLAFLARLPDNFNEAKFITFSMLIFCSVWITFIPAYVSSPGKYTVAVEIFAILASSFGLLFCIFPKCYIILKPEKNTKXHLMEKPA  
>Reef fish, locus40460.1

CMSCPISYRSNKEKNOICIKDTEFLSFEEMGSLVLLFALLGALMTISVAVIFILYDTPVIVRANNSSELSFLLLSLMLCFLCSIAFIGOPLSWSMCLRHTAFGIFSVLVCISCVLKGTVVLMVFKATQPGSNIMKWFQIQRIMISACTSVQIICAIVLAMPFPPSKNTKYQSSK  
FTLTQVICTFWLFLSPPPHNFNTSYKEKIIILECEVGSIVAFVCLGYIGLSAVCFVLAFLARLPDNFNEAKFITFSMLIFCSVWITFIPAYVSSPGKYTVAVEIFAILASSFGLLFCIFPKCYIILKPEKNTKXHLMEKPA  
>Reef fish, locus40468.1

CMSCPISYRSNKEKNOICIKDTEFLSFEEMGSLVLLFALLGALMTISVAVIFILYDTPVIVRANNSSELSFLLLSLMLCFLCSIAFIGOPLSWSMCLRHTAFGIFSVLVCISCVLKGTVVLMVFKATQPGSNIMKWFQIQRIMISACTSVQIICAIVLAMPFPPSKNTKYQSSK  
FTLTQVICTFWLFLSPPPHNFNTSYKEKIIILECEVGSIVAFVCLGYIGLSAVCFVLAFLARLPDNFNEAKFITFSMLIFCSVWITFIPAYVSSPGKYTVAVEIFAILASSFGLLFCIFPKCYIILKPEKNTKXHLMEKPA  
>Reef fish, locus40458.1

CMSCPISYRSNKEKNOICIKDTEFLSFEEMGSLVLLFALLGALMTISVAVIFILYDTPVIVRANNSSELSFLLLSLMLCFLCSIAFIGOPLSWSMCLRHTAFGIFSVLVCISCVLKGTVVLMVFKATQPGSNIMKWFQIQRIMISACTSVQIICAIVLAMPFPPSKNTKYQSSK  
FTLTQVICTFWLFLSPPPHNFNTSYKEKIIILECEVGSIVAFVCLGYIGLSAVCFVLAFLARLPDNFNEAKFITFSMLIFCSVWITFIPAYVSSPGKYTVAVEIFAILASSFGLLFCIFPKCYIILKPEKNTKXHLMEKPA  
>Reef fish, locus40464.1

CMSCPISYRSNKEKNOICIKDTEFLSFEEMGSLVLLFALLGALMTISVAVIFILYDTPVIVRANNSSELSFLLLSLMLCFLCSIAFIGOPLSWSMCLRHTAFGIFSVLVCISCVLKGTVVLMVFKATQPGSNIMKWFQIQRIMISACTSVQIICAIVLAMPFPPSKNTKYQSSK  
FTLTQVICTFWLFLSPPPHNFNTSYKEKIIILECEVGSIVAFVCLGYIGLSAVCFVLAFLARLPDNFNEAKFITFSMLIFCSVWITFIPAYVSSPGKYTVAVEIFAILASSFGLLFCIFPKCYIILKPEKNTKXHLMEKPA  
>Reef fish, locus40437.1

CMSCPISYRSNKEKNOICIKDTEFLSFEEMGSLVLLFALLGALMTISVAVIFILYDTPVIVRANNSSELSFLLLSLMLCFLCSIAFIGOPLSWSMCLRHTAFGIFSVLVCISCVLKGTVVLMVFKATQPGSNIMKWFQIQRIMISACTSVQIICAIVLAMPFPPSKNTKYQSSK  
FTLTQVICTFWLFLSPPPHNFNTSYKEKIIILECEVGSIVAFVCLGYIGLSAVCFVLAFLARLPDNFNEAKFITFSMLIFCSVWITFIPAYVSSPGKYTVAVEIFAILASSFGLLFCIFPKCYIILKPEKNTKXHLMEKPA  
>Reef fish, locus40444.1

CMSCPISYRSNKEKNOICIKDTEFLSFEEMGSLVLLFALLGALMTISVAVIFILYDTPVIVRANNSSELSFLLLSLMLCFLCSIAFIGOPLSWSMCLRHTAFGIFSVLVCISCVLKGTVVLMVFKATQPGSNIMKWFQIQRIMISACTSVQIICAIVLAMPFPPSKNTKYQSSK  
FTLTQVICTFWLFLSPPPHNFNTSYKEKIIILECEVGSIVAFVCLGYIGLSAVCFVLAFLARLPDNFNEAKFITFSMLIFCSVWITFIPAYVSSPGKYTVAVEIFAILASSFGLLFCIFPKCYIILKPEKNTKXHLMEKPA  
>Reef fish, locus40451.1

CMSCPISYRSNKEKNOICIKDTEFLSFEEMGSLVLLFALLGALMTISVAVIFILYDTPVIVRANNSSELSFLLLSLMLCFLCSIAFIGOPLSWSMCLRHTAFGIFSVLVCISCVLKGTVVLMVFKATQPGSNIMKWFQIQRIMISACTSVQIICAIVLAMPFPPSKNTKYQSSK  
FTLTQVICTFWLFLSPPPHNFNTSYKEKIIILECEVGSIVAFVCLGYIGLSAVCFVLAFLARLPDNFNEAKFITFSMLIFCSVWITFIPAYVSSPGKYTVAVEIFAILASSFGLLFCIFPKCYIILKPEKNTKXHLMEKPA  
>Reef fish, locus27546.1

CMSCPISYRSNKEKNOICIKDTEFLSFEEMGSLVLLFALLGALMTISVAVIFILYDTPVIVRANNSSELSFLLLSLMLCFLCSIAFIGOPLSWSMCLRHTAFGIFSVLVCISCVLKGTVVLMVFKATQPGSNIMKWFQIQRIMISACTSVQIICAIVLAMPFPPSKNTKYQSSK  
FTLTQVICTFWLFLSPPPHNFNTSYKEKIIILECEVGSIVAFVCLGYIGLSAVCFVLAFLARLPDNFNEAKFITFSMLIFCSVWITFIPAYVSSPGKYTVAVEIFAILASSFGLLFCIFPKCYIILKPEKNTKXHLMEKPA  
>Reef fish, locus27548.1

CMSCPISYRSNKEKNOICIKDTEFLSFEEMGSLVLLFALLGALMTISVAVIFILYDTPVIVRANNSSELSFLLLSLMLCFLCSIAFIGOPLSWSMCLRHTAFGIFSVLVCISCVLKGTVVLMVFKATQPGSNIMKWFQIQRIMISACTSVQIICAIVLAMPFPPSKNTKYQSSK  
FTLTQVICTFWLFLSPPPHNFNTSYKEKIIILECEVGSIVAFVCLGYIGLSAVCFVLAFLARLPDNFNEAKFITFSMLIFCSVWITFIPAYVSSPGKYTVAVEIFAILASSFGLLFCIFPKCYIILKPEKNTKXHLMEKPA  
>Reef fish, locus27551.1

MGSLVLLSLLGTFMTICVSVIFILYDTPVIVKANNSSELSFLLLSLMLCFLCSIAFIGOPLSWSMCLRHTAFGIFSVLVCISCVLKGTVVLMVFKATQPGSNIMKWFQIQRIMISACTSVQIICAIVLAMPFPPSKNTKYQSSK  
IILECEVGSIVAFVCLGYIGLSAVCFVLAFLARLPDNFNEAKFITFSMLIFCSVWITFIPAYVSSPGKYTVAVEIFAILASSFGLLFCIFPKCYIILKPEKNTKXHLMEKPA







CLCEPDHWSNDRRDKCILTEFLSYEEPLGATLASISIFSSLPAAVLCFIRYHDPVTKANNRELSYLLLALMLCFLCSLFIGOPLVATCMLRQAFGIIFALCVSCLVAKTMMVIAFNATKPNNSLKKWVGPGLANSIVFV  
CTLFQVQIICITWLSPPPEQNMKSOPGTIIIECNEGSTIAFWCLGYMGLLAIISFVAFARLRLPDSFNEAKFITFSMLVFSVWMLAFIPAYLSTRGKYMVAVEIFAILASSAGLLACIFFPKCYIILLRPMNTRKHELMGKGT  
>Coelacanth, locus304.1  
CLCKPNDHWSNARDKCPKPIEFLSYKEPLGATLASISLSSVPIVAILCTFKYQDPTVKANNREVSYLLLALVLCFLCSLFIGYPMMITCMLRQAAGFIIFALCVSCLVAKTMMVIAFNATKPNNSLKKWVGPGLANSIVFV  
CTMLQVLTICIAWLTSSPPPEQNMKSOPGTIIIECNEGSTIAFWCLGYMGLLAIISFVAFARLRLPDSFNEAKFITFSMLVFSVWMLAFIPAYLSTRGKYMVAVEIFAILASSAGLLACIFFPKCYIILLRPMNTRKHELMGKGT  
>Coelacanth, locus305.1  
CLCKPDDHWSNRRDCEPKPIEFLSYEEPLGATLASISVSSLPVAILSTFKYRDPVTKANNRELSYLLLALVLCFLCSLFIGYPRKVTMLRQAAGFIIFALCVSCLVAKTMMVIAFNATKPNNSLKKWVGPGLANSIVFV  
CTLQVQIICIAWLTSSPPPEQNMKSOPGTIIIECNEGSTIAFWCLGYMGLLAIISFVAFARLRLPDSFNEAKFITFSMLVFSVWMLAFIPAYLSTRGKYMVAVEIFAILASSAGLLACIFFPKCYIILLRPMNTRKHELMGKGT  
>Coelacanth, locus308.1  
CLCKPDDHWSNRRDCEPKPIEFLSYEEPLGATLASISVASSLPVILSTFKYRDPVTKANNRELSYLLLALVLCFLCSLFIGYPRKVTMLRQAAGFIIFALCVSCLVAKTMMVIAFNATKPNNSLKKWVGPGLANSIVFV  
CTLQVQIICIAWLTSSPPPEQNMKSOPGTIIIECNEGSTIAFWCLGYMGLLAIISFVAFARLRLPDSFNEAKFITFSMLVFSVWMLAFIPAYLSTRGKYMVAVEIFAILASSAGLLACIFFPKCYIILLRPMNTRKHELMGKGT  
>Coelacanth, locus306.1  
CLCKPDDHWSNRRDCEPKPIEFLSYEEPLGATLASISIAFSLPVAIISTFKYRDPVTKANNRELSYLLLALVLCFLCSLFIGYPRKVTMLRQAAGFIIFALCVSCLVAKTMMVIAFNATKPNNSLKKWVGPGLANSIVFV  
CTLQVQIICIAWLTSSPPPEQNMKSOPGTIIIECNEGSTIAFWCLGYMGLLAIISFVAFARLRLPDSFNEAKFITFSMLVFSVWMLAFIPAYLSTRGKYMVAVEIFAILASSAGLLACIFFPKCYIILLRPMNTRKHELMGKGT  
>Coelacanth, locus352.1  
CLCKPDDHWSNRRDCEPKPIEFLSYKEPLGATLGAITFSAIPSTILCVFIRYRNPVTKANNRELSYLLLALVLCFLCSLFIGYPTGVTMLRHAFAFIIFALCVSCLVAKTMMVIAFNATKPNNSLKKWVGPGLANSIVFV  
CTLQVQIICIAWLTSSPPPEQNMKSOPGTIIIECNEGSTIAFWCLGYMGLLAIISFVAFARLRLPDSFNEAKFITFSMLVFSVWMLAFIPAYLSTRGKYMVAVEIFAILASSAGLLACIFFPKCYIILLRPMNTRKHELMGKGT  
>Coelacanth, locus261.1  
CMKCPDDHWSNRRDCEPKPIEFLSYKEPLGATLGAITFSAIPSTILCVFIRYRNPVTKANNRELSYLLLALVLCFLCSLFIGYPTGVTMLRHAFAFIIFALCVSCLVAKTMMVIAFNATKPNNSLKKWVGPGLANSIVFV  
CTLQVQIICIAWLTSSPPPEQNMKSOPGTIIIECNEGSTIAFWCLGYMGLLAIISFVAFARLRLPDSFNEAKFITFSMLVFSVWMLAFIPAYLSTRGKYMVAVEIFAILASSAGLLACIFFPKCYIILLRPMNTRKHELMGKGT  
>Coelacanth, locus395.1  
CMKCPDDHWSNRRDCEPKPIEFLSYKEPLGATLGAITFSAIPSTILCVFIRYRNPVTKANNRELSYLLLALVLCFLCSLFIGYPTGVTMLRHAFAFIIFALCVSCLVAKTMMVIAFNATKPNNSLKKWVGPGLANSIVFV  
CTAVQIICITWLSPPPEQNMKSOPGTIIIECNEGSTIAFWCLGYMGLLAIISFVAFARLRLPDSFNEAKFITFSMLVFSVWMLAFIPAYLSTRGKYMVAVEIFAILASSAGLLACIFFPKCYIILLRPMNTRKHELMGKGT  
>Coelacanth, locus274.1  
CMKCPDDHWSNRRDCEPKPIEFLSYKEPLGATLGAITFSAIPSTILCVFIRYRNPVTKANNRELSYLLLALVLCFLCSLFIGYPTGVTMLRHAFAFIIFALCVSCLVAKTMMVIAFNATKPNNSLKKWVGPGLANSIVFV  
CAVIQVQIICIAWLTSSPPPEQNMKSOPGTIIIECNEGSTIAFWCLGYMGLLAIISFVAFARLRLPDSFNEAKFITFSMLVFSVWMLAFIPAYLSTRGKYMVAVEIFAILASSAGLLACIFFPKCYIILLRPMNTRKHELMGKGT  
>Coelacanth, locus334.1  
CICQSLDYPWNGKDKCKIEEFLSFHDLTGLTITLVSFLVGLATLTVASVFLQYKTPVTKANNRELSYLLLALVLCFLCSLFIGYPTGVTMLRHAFAFIIFALCVSCLVAKTMMVIAFNATKPNNSLKKWVGPGLANSIVFV  
CTLIQVTFIVVWTVLPPPIYKNSHSYKILIECALGSLALYGVCMYIGFLSICIFLAFARLRLPDSFNEAKFITFSMLVFSVWMLAFIPAYLSTRGKYMVAVEIFAILASSAGLLACIFFPKCYIILLRPMNTRKHELMGKGT  
>Mouse, locus223.1  
CDPCGDDHWSNAEKSCKVCPKLEFLVYKALGFTLVLSIFGALVLLAVTVVYVYHRRHTPLVKANNRELSYLLLALVLCFLCSLFIGYPTGVTMLRHAFAFIIFALCVSCLVAKTMMVIAFNATKPNNSLKKWVGPGLANSIVFV  
SMHPIFRKILVLCVVGEGVCAAYVLEPRPMFNIEIQVNIIEFCNEGSVEFLCSIFGFDVLLALCLLCTFFVARQLPDNYEGKCTIFGMLVFFIWIISFVAPYVSTKGGKFAVEIFAILASSAGLLACIFFPKCYIILLRPMNTRKHELMGKGT  
NDETVGGRVPT  
>Mouse, locus22.1  
CDPCGDDHWSNAEKSCKVCPKLEFLVYKALGFTLVLSIFGALVLLAVTVVYVYHRRHTPLVKANNRELSYLLLALVLCFLCSLFIGYPTGVTMLRHAFAFIIFALCVSCLVAKTMMVIAFNATKPNNSLKKWVGPGLANSIVFV  
SMHPIFRKILVLCVVGEGVCAAYVLEPRPMFNIEIQVNIIEFCNEGSVEFLCSIFGFDVLLALCLLCTFFVARQLPDNYEGKCTIFGMLVFFIWIISFVAPYVSTKGGKFAVEIFAILASSAGLLACIFFPKCYIILLRPMNTRKHELMGKGT  
NDETVGGRVPT  
>Coelacanth, locus327.1  
MGILLAVSLIGFIIITIAVVIFFYRHTPVTKANNRELSYLLLALVLCFLCSLFIGYPTGVTMLRHAFAFIIFALCVSCLVAKTMMVIAFNATKPNNSLKKWVGPGLANSIVFV  
IIECDLGSVAFYCVLGIYGLSILCFVLAFLARLRLPDSFNEAKFITFSMLVFSVWMLAFIPAYLSTRGKYMVAVEIFAILASSAGLLACIFFPKCYIILLRPMNTRKHELMGKGT  
>Coelacanth, locus329.1  
CTKCPLEYNSNQRDCEPKPIEFLSYKEPLGATLGAITFSAIPSTILCVFIRYRNPVTKANNRELSYLLLALVLCFLCSLFIGYPTGVTMLRHAFAFIIFALCVSCLVAKTMMVIAFNATKPNNSLKKWVGPGLANSIVFV  
LTLIQGLICTLWLSLSPPYASKNMKHYKDRILECENLGSVTAFCVLYGIGVLSLFCVLAFLARLRLPDSFNEAKFITFSMLVFSVWMLAFIPAYLSTRGKYMVAVEIFAILASSAGLLACIFFPKCYIILLRPMNTRKHELMGKGT  
>Coelacanth, locus330.1  
MGILLVLSLTSFTTIIATLIIFFYRHTPVTKANNRELSYLLLALVLCFLCSLFIGYPTGVTMLRHAFAFIIFALCVSCLVAKTMMVIAFNATKPNNSLKKWVGPGLANSIVFV  
IIECENLGSVTAFCVLYGIGVLSLFCVLAFLARLRLPDSFNEAKFITFSMLVFSVWMLAFIPAYLSTRGKYMVAVEIFAILASSAGLLACIFFPKCYIILLRPMNTRKHELMGKGT  
>Reedfish, locus27623.1  
CLCKPPEYNSNQRDCEPKPIEFLSYKEPLGATLGAITFSAIPSTILCVFIRYRNPVTKANNRELSYLLLALVLCFLCSLFIGYPTGVTMLRHAFAFIIFALCVSCLVAKTMMVIAFNATKPNNSLKKWVGPGLANSIVFV  
STLIQVCIICAVMLISPPFYSKNIYYKDKIIECENLGSVTAFCVLYGIGVLSLFCVLAFLARLRLPDSFNEAKFITFSMLVFSVWMLAFIPAYLSTRGKYMVAVEIFAILASSAGLLACIFFPKCYIILLRPMNTRKHELMGKGT  
>Reedfish, locus27713.1  
MEYNSNAKDKCFKTEHLSFEELIIGLITLAVSLMGVCIIVLTAFFLYKHTPVTKANNRELSYLLLALVLCFLCSLFIGYPTGVTMLRHAFAFIIFALCVSCLVAKTMMVIAFNATKPNNSLKKWVGPGLANSIVFV  
SLIFLWLIAPPADRNFYSYRDKIIECENLGSVTAFCVLYGIGVLSLFCVLAFLARLRLPDSFNEAKFITFSMLVFSVWMLAFIPAYLSTRGKYMVAVEIFAILASSAGLLACIFFPKCYIILLRPMNTRKHELMGKGT  
>Reedfish, locus27629.1  
MGILLVLSLIGFIIITIAVVIFFYRHTPVTKANNRELSYLLLALVLCFLCSLFIGYPTGVTMLRHAFAFIIFALCVSCLVAKTMMVIAFNATKPNNSLKKWVGPGLANSIVFV  
IIECENLGSVTAFCVLYGIGVLSLFCVLAFLARLRLPDSFNEAKFITFSMLVFSVWMLAFIPAYLSTRGKYMVAVEIFAILASSAGLLACIFFPKCYIILLRPMNTRKHELMGKGT  
>Reedfish, locus40391.1  
CFPCPKWYNSNQRDCEPKPIEFLSYKEPLGATLGAITFSAIPSTILCVFIRYRNPVTKANNRELSYLLLALVLCFLCSLFIGYPTGVTMLRHAFAFIIFALCVSCLVAKTMMVIAFNATKPNNSLKKWVGPGLANSIVFV  
STFVQVICTLWLTSSPPPEQNMKSOPGTIIIECNEGSTIAFWCLGYMGLLAIISFVAFARLRLPDSFNEAKFITFSMLVFSVWMLAFIPAYLSTRGKYMVAVEIFAILASSAGLLACIFFPKCYIILLRPMNTRKHELMGKGT  
-MLCPQYNSNQRDCEPKPIEFLSYKEPLGATLGAITFSAIPSTILCVFIRYRNPVTKANNRELSYLLLALVLCFLCSLFIGYPTGVTMLRHAFAFIIFALCVSCLVAKTMMVIAFNATKPNNSLKKWVGPGLANSIVFV  
CTLIQAIICVWLITSPPPYQNMKYNDIIECALGSAFAFVLYGIGVLSLFCVLAFLARLRLPDSFNEAKFITFSMLVFSVWMLAFIPAYLSTRGKYMVAVEIFAILASSAGLLACIFFPKCYIILLRPMNTRKHELMGKGT  
>Reedfish, locus40385.1  
MAKQDCEKIEFLSYEDVGLITLVSFLSGASITVAVALIFFQHRHTPVTKANNRELSYLLLALVLCFLCSLFIGYPTGVTMLRHAFAFIIFALCVSCLVAKTMMVIAFNATKPNNSLKKWVGPGLANSIVFV  
WLTSSYPPDRNMEYSKDIIECENLGSVTAFCVLYGIGVLSLFCVLAFLARLRLPDSFNEAKFITFSMLVFSVWMLAFIPAYLSTRGKYMVAVEIFAILASSAGLLACIFFPKCYIILLRPMNTRKHELMGKGT  
>Western\_c\_lawed\_frog, locus480.1  
MLSSVPLVILGIFIIHYKNTPIVANNRELSYLLLALVLCFLCSLFIGYPTGVTMLRHAFAFIIFALCVSCLVAKTMMVIAFNATKPNNSLKKWVGPGLANSIVFV  
PTAFWMLGGLLASISFVAFARLRLPDSFNEAKFITFSMLVFSVWMLAFIPAYLSTRGKYMVAVEIFAILASSAGLLACIFFPKCYIILLRPMNTRKHELMGKGT  
>Western\_c\_lawed\_frog, locus479.1  
MWPNLQDRCLPRPTEFLSYENPLGYSLAAISMLSSIPLVILGIFIIHYKNTPIVANNRELSYLLLALVLCFLCSLFIGYPTGVTMLRHAFAFIIFALCVSCLVAKTMMVIAFNATKPNNSLKKWVGPGLANSIVFV  
DCVLWLFSPPFHELDTDTPQGVIIANCGESPTAFWMLGGLLASISFVAFARLRLPDSFNEAKFITFSMLVFSVWMLAFIPAYLSTRGKYMVAVEIFAILASSAGLLACIFFPKCYIILLRPMNTRKHELMGKGT  
>Western\_c\_lawed\_frog, locus476.1  
MWPNLQDRCLPRPTEFLSYENPLGYSLAAISMLSSIPLVILGIFIIHYKNTPIVANNRELSYLLLALVLCFLCSLFIGYPTGVTMLRHAFAFIIFALCVSCLVAKTMMVIAFNATKPNNSLKKWVGPGLANSIVFV  
DCALWLFSPPFHELDTDTPQGVIIANCGESPTAFWMLGGLLASISFVAFARLRLPDSFNEAKFITFSMLVFSVWMLAFIPAYLSTRGKYMVAVEIFAILASSAGLLACIFFPKCYIILLRPMNTRKHELMGKGT  
>Western\_c\_lawed\_frog, locus482.1  
MIPVILGIFIIHYKNTPIVANNRELSYLLLALVLCFLCSLFIGYPTGVTMLRHAFAFIIFALCVSCLVAKTMMVIAFNATKPNNSLKKWVGPGLANSIVFV  
WMLGGLLASISFVAFARLRLPDSFNEAKFITFSMLVFSVWMLAFIPAYLSTRGKYMVAVEIFAILASSAGLLACIFFPKCYIILLRPMNTRKHELMGKGT  
>Western\_c\_lawed\_frog, locus483.1  
CHPSWDTWPNLQDRCLPRPTEFLSYENPLGYSLAAISMLSSIPLVILGIFIIHYKNTPIVANNRELSYLLLALVLCFLCSLFIGYPTGVTMLRHAFAFIIFALCVSCLVAKTMMVIAFNATKPNNSLKKWVGPGLANSIVFV  
CALIQIDCALWLFSPPFHELDTDTPQGVIIANCGESPTAFWMLGGLLASISFVAFARLRLPDSFNEAKFITFSMLVFSVWMLAFIPAYLSTRGKYMVAVEIFAILASSAGLLACIFFPKCYIILLRPMNTRKHELMGKGT  
>Western\_c\_lawed\_frog, locus477.1  
CHPSWDTWPNLQDRCLPRPTEFLSYENPLGYSLAAISMLSSIPLVILGIFIIHYKNTPIVANNRELSYLLLALVLCFLCSLFIGYPTGVTMLRHAFAFIIFALCVSCLVAKTMMVIAFNATKPNNSLKKWVGPGLANSIVFV  
CIFVQIDCALWLFSPPFHELDTDTPQGVIIANCGESPTAFWMLGGLLASISFVAFARLRLPDSFNEAKFITFSMLVFSVWMLAFIPAYLSTRGKYMVAVEIFAILASSAGLLACIFFPKCYIILLRPMNTRKHELMGKGT  
>Western\_c\_lawed\_frog, locus474.1  
CHPSWDTWPNLQDRCLPRPTEFLSYENPLGYSLAAISMLSSIPLVILGIFIIHYKNTPIVANNRELSYLLLALVLCFLCSLFIGYPTGVTMLRHAFAFIIFALCVSCLVAKTMMVIAFNATKPNNSLKKWVGPGLANSIVFV  
CIFVQIDCALWLFSPPFHELDTDTPQGVIIANCGESPTAFWMLGGLLASISFVAFARLRLPDSFNEAKFITFSMLVFSVWMLAFIPAYLSTRGKYMVAVEIFAILASSAGLLACIFFPKCYIILLRPMNTRKHELMGKGT  
>Western\_c\_lawed\_frog, locus481.1  
CHPSWDTWPNLQDRCLPRPTEFLSYENPLGYSLAAISMLSSIPLVILGIFIIHYKNTPIVANNRELSYLLLALVLCFLCSLFIGYPTGVTMLRHAFAFIIFALCVSCLVAKTMMVIAFNATKPNNSLKKWVGPGLANSIVFV  
CALIQIDCALWLFSPPFHELDTDTPQGVIIANCGESPTAFWMLGGLLASISFVAFARLRLPDSFNEAKFITFSMLVFSVWMLAFIPAYLSTRGKYMVAVEIFAILASSAGLLACIFFPKCYIILLRPMNTRKHELMGKGT  
>Western\_c\_lawed\_frog, locus454.1  
MFSSTPIAIIIGIFIIHYKNTPIVANNRELSYLLLALVLCFLCSLFIGYPTGVTMLRHAFAFIIFALCVSCLVAKTMMVIAFNATKPNNSLKKWVGPGLANSIVFV  
PTAFWMLGGLLASISFVAFARLRLPDSFNEAKFITFSMLVFSVWMLAFIPAYLSTRGKYMVAVEIFAILASSAGLLACIFFPKCYIILLRPMNTRKHELMGKGT  
>Western\_c\_lawed\_frog, locus484.1  
CHPSWDTWPNLQDRCLPRPTEFLSYENPLGYSLAAISMLSSIPLVILGIFIIHYKNTPIVANNRELSYLLLALVLCFLCSLFIGYPTGVTMLRHAFAFIIFALCVSCLVAKTMMVIAFNATKPNNSLKKWVGPGLANSIVFV  
CALIQIDCALWLFSPPFHELDTDTPQGVIIANCGESPTAFWMLGGLLASISFVAFARLRLPDSFNEAKFITFSMLVFSVWMLAFIPAYLSTRGKYMVAVEIFAILASSAGLLACIFFPKCYIILLRPMNTRKHELMGKGT  
>Mouse, locus347.1  
CVHCPETHYASAEKRRHCKKKTITFLSYNDPLGKGTITLISIGFSTLTAIIVWVFEHRGTPVTKANNRELSYLLLALVLCFLCSLFIGYPTGVTMLRHAFAFIIFALCVSCLVAKTMMVIAFNATKPNNSLKKWVGPGLANSIVFV  
CIIQIQLLSGLWLTGSPFFIDKDCHESEHGIILCSKGSYIYFYCTLAYLWMAFGSYLLAFLSRRLPDRFNESKSLAFSMLVFCVSWMFLPVCHSTSGKVMVAMEFISLASSASLIIIVFAPKCYIVLFRPELNTLNRDKRHH  
>Mouse, locus345.1  
CVHCPETHYASAEKRRHCKKKTITFLSYNDPLGKGTITLISIGFSTLTAIIVWVFEHRGTPVTKANNRELSYLLLALVLCFLCSLFIGYPTGVTMLRHAFAFIIFALCVSCLVAKTMMVIAFNATKPNNSLKKWVGPGLANSIVFV  
CIIQIQLLSGLWLTGSPFFIDKDCHESEHGIILCSKGSYIYFYCTLAYLWMAFGSYLLAFLSRRLPDRFNESKSLAFSMLVFCVSWMFLPVCHSTSGKVMVAMEFISLASSASLIIIVFAPKCYIVLFRPELNTLNRDKRHH  
>Mouse, locus346.1  
CVHCPETHYASAEKRRHCKKKTITFLSYNDPLGKGTITLISIGFSTLTAIIVWVFEHRGTPVTKANNRELSYLLLALVLCFLCSLFIGYPTGVTMLRHAFAFIIFALCVSCLVAKTMMVIAFNATKPNNSLKKWVGPGLANSIVFV  
CIIQIQLLSGLWLTGSPFFIDKDCHESEHGIILCSKGSYIYFYCTLAYLWMAFGSYLLAFLSRRLPDRFNESKSLAFSMLVFCVSWMFLPVCHSTSGKVMVAMEFISLASSASLIIIVFAPKCYIVLFRPELNTLNRDKRHH  
>Mouse, locus348.1  
MSLGFSAFTLIIIGVFNHRDTPVTKANNRELSYLLLALVLCFLCSLFIGYPTGVTMLRHAFAFIIFALCVSCLVAKTMMVIAFNATKPNNSLKKWVGPGLANSIVFV  
GSAIAFYCTLAYLWMAFGSYLLAFLSRRLPDRFNESKSLAFSMLVFCVSWMFLPVCHSTSGKVMVAMEFISLASSASLIIIVFAPKCYIVLFRPELNTLNRDKRHH  
>Mouse, locus63.1













CTAIQV IICAGLAHSPFPFYDNKSKMDTIIEMCNKGSVPVAYSCTI-----KLPGSFNEAKLITFSMLIFGAVWISFIPAHLSSTTGKYMVAVEVFAILSSSSGLLVCILLPKVYIILRPEMKNKDKRKFII--  
>Western\_c\_lawed\_frog, locus858.1  
CMKCPEDMWNADKHNCGMKSLEFLSFRLETGGTLLTISVGLSFLPLSILAVFKNAETPVVKANNRNL SYLLLSLFCYLCALMFIGRPTITICILRQIFIGISFVMCISCVLGTMMVVI AFNLTPQRSSRRMNLNSRVNTLVLV  
CTAIQV IICAGLAHSPFPFYDNKSKMGTIIECNKGSPIAYSCTI-----KLPGSFNEAKLITFSMLIFGAVWISFIPAYLSTTGKYMVAVEIFAMLSSSSGLVTCIFLPKVYIILRPEMKNKDKRMTNSY  
>Western\_c\_lawed\_frog, locus860.1  
CMKCTEDMWNADKHNCGMKSLEFLSFRLETGGTLLTISVGLSFLPLSILAVFKNAETPVVKANNRNL SYLLLSLFCYLCALMFIGRPTITICILRQIFIGISFVMCISCVLGTMMVVI AFNLTPQRSSRRMNLNSRVNTLVLV  
CTAIQV IICAGLAHSPFPFYDNKSKAGTIIIECNKGSVPVAYSCTI-----KLPGSFNEAKLITFSMLIFGAVWISFIPAYLSTTGKYMVAVEIFAMLSSSSGLVTCIFLPKVYIILRPEMNTKDKRKCICK--  
>Western\_c\_lawed\_frog, locus857.1  
-----  
MWANEHNACGMRTLELLTYNEALGGTLATLSVMGLVPLTILITIFIKNSETPVVKANNRNL SYLLLSLFCYLCALMFIGRPTITICILRQIFIGISFVMCISCVLGTMMVVI AFNLTPQRSSRRMNLNSRVNTLVLVCTAIQVI  
ICAGLAHSPFPFYDNKSKAGTIIIECNKGSVPVAYSCTI-----KLPGSFNEAKLITFSMLIFGAVWISFIPAYLSTTGKYMVAVEIFAMLSSSSGLLVCIFLPKVYIILRPEMKNKERNILIT--  
>Western\_c\_lawed\_frog, locus865.1  
-----  
MWPTEQHDGCRPRSLEYLAVEDPLGGTLASL SVVGLSILPLSILGIFLNSKTPVVKANNRNL SYLLL FALFCLFCLSMFIGAPVHLICVLRQITFGVSVLVCVSCVLGKIMVVI AFNATOPKSSRRMNLNSRIPNTLIVCMITQII  
ICSWWIMHSPFKMNDITSLKGLVITLCECVGSPVAFWMI-----NLPGSFNEAKMIFSMILIFGAVWISFIPYTLSTRGKESVAVEIFAILCSCSGLLALLFPFKCYIILRPEMKNKFLTGKRGF  
>Western\_c\_lawed\_frog, locus864.1  
-----  
MWPTEHGDGCRPRSLEYLAVEDPLGGTLASL SVVGLSILPLSILVIFLNSKTPVVKANNRNL SYLLL FALFCLFCLSMFIGAPVHLICVLRQITFGVSVLVCVSCVLGKIMVVI AFNATOPKSSRRMNLNSRIPNTLIVCMITQII  
ICSWWIMHSPFKMNDITSLKGLVITLCECVGSPVAFWMI-----KLPGSFNEAKMIFSMILIFGAVWISFIPYTLSTRGKESVAVEIFAILCSCSGLLALLFPFKCYIILRPEMKNKFLTGKRGF  
>Anole\_lizard, locus203.1  
-----  
MCLPKKELFLAFHEPLGASLASAVCGSIMPIMILAFIAHOETPLVRANSRELSYLLLIGLALSCLLFLGQPSHTSCLLRQVFMGTALFCISLAKTILVVAAFRAISPRGHSRWLSSRRMPCSVLIGLLQLFLCAIWSMT  
SPPYIKRN---SFP5AITLSCHEGSPATFHWGLSYLGLFAGLSLTAFAFLARNLPEAFNEALSICFSLGSGFVWLAFAVPAYLTSPEYAAVTEAFALASSLSLIGMFLPKCYILLHPQLNRRCLMRLEK  
>Western\_c\_lawed\_frog, locus499.1  
CYLCSDDDEMPNSARNHCLSRAIELLSLSEPPGLSGTAVIGSLLPAVYVIFIRNRDTPVVKANNRNL SYLLLAALLSFLCPLLLFPPTGFLCFIRQAAGFIFALCISCLAKTIVVLAFRANQLGKMLMGPRSPRIALS  
CTVFQTLCLSWIISQPPPEQDIDKSOVGTITIKNEG---LGFVWMLGVLGSLTICFVAFLARLPGAFNEATHITSMVFLCVMWSFVPAYLSTHGKLVATEIFAILSSSAGLFCIFSPKCYILLKPKQNLTRPLVSGHRR  
>Coelacanth, locus294.1  
CLKCPDDQWSNELQDQICPTIEFLAYEDAVGATLAVSIFCALFTVLCIFIKYRNTPIVKANNRELSYLLLSLVCFLSFLVFIGOPKWTSCMLRQAFGIFALSVSVCVLAKTMMVVI AFNATKPNSLRKKWGPGLNSIVFVCTI  
CTVIQIICIVWLASAPPFPTEMMKSGIITIECNEGSTTAFWCVLGYMGLLAIISFVAFARLNL PDSFNEAKFITFSMLVFSVWLAFAIPAYLSTGKYMVAVEIFAILASSAGLACIFFPKCYIILRPMNTRKSLMGKSKL  
>Coelacanth, locus295.1  
-----  
MGATLAL SILCALLSKTLCIFIKYRNTPIVKANNRELSYLLLSLVCFLSFLVFIGOPKWTSCMLRQAFGIFALSVSVCVLAKTMMVVI AFNATKPNSLRKKWGPGLNSIVFVCTI I QIICIVWLASAPPFPTEMMKSGI  
ITIECNEGSTTAFWCVLGYMGLLAIISFVAFARLNL PDSFNEAKFITFSMLVFSVWLAFAIPAYLSTGKYMVAVEIFAILASSAGLACIFFPKCYIILRPMNTRKSLMGKSKL  
>Coelacanth, locus292.1  
-----  
MGATLAVLSIFCALYSIVLVCIFIKYRNTPIVKANNRELSYLLLSLVCFLSFLVFIGOPKWTSCMLRQAFGIFALSVSVCVLAKTMMVVI AFNATKPNSLRKKWGPGLNSIVFVCTI I QIICIVWLASAPPFPTEMMKSGI  
ITIECNEGSTTAFWCVLGYMGLLAIISFVAFARLNL PDSFNEAKFITFSMLVFSVWLAFAIPAYLSTGKYMVAVEIFAILASSAGLACIFFPKCYIILRPMNTRKSLMGKSKL  
>Coelacanth, locus389.1  
-----  
MGATLAL SILCALLSKTLCIFIKYRNTPIVKANNRELSYLLLSLVCFLSFLVFIGOPKWTSCMLRQAFGIFALSVSVCVLAKTMMVVI AFNATKPNSLRKKWGPGLNSIVFVCTI I QIICIVWLASAPPFPTEMMKSGI  
MILECNESSTAFWCVLGYMGLLAIISFVAFARLNL PDSFNEAKFITFSMLVFSVWLAFAIPAYLSTGKYMVAVEIFAILASSAGLACIFFPKCYIILRPMNTRKSLMGKSKL  
>Coelacanth, locus290.1  
CLKCPYDRWSNEQDQICPKTIEFLAYEDAMGTLATVLSILCALVSTTVLCIFIKYRNTPIVKANNRELSYLLLSLVCFLSFLVFIGOPKWTSCMLRQAFGIFALSVSVCVLAKTMMVVI AFNATKPNSLRKKWGPGLNSIVL  
CTVIQIICIVWLASAPPFPTEMMKSGIITIECNEGSTTAFWCVLGYMGLLAIISFVAFARLNL PDSFNEAKFITFSMLVFSVWLAFAIPAYLSTGKYMVAVEIFAILASSAGLACIFFPKCYIILRPMNTRKSLMGKSKL  
>Coelacanth, locus321.1  
-----  
MGATLAVLSILCALSTTVLCIFIKYRNTPIVKANNRELSYLLLSLVCFLSFLVFIGOPKWTSCMLRQAFGIFALSVSVCVLAKTMMVVI AFNATKPNSLRKKWGPGLNSIVFVCTI I QIICIVWLASAPPFPTEMMKSGI  
ITIECNEGSTTAFWCVLGYMGLLAIISFVAFARLNL PDSFNEAKFITFSMLVFSVWLAFAIPAYLSTGKYMVAVEIFAILASSAGLACIFFPKCYIILRPMNTRKSLMGKSKL  
>Coelacanth, locus320.1  
CLKCPDDQWSNE---  
QDKICSKTIEFLAYEDALGATLAVSIFCALSTTVLCIFIKYRNTPIVKANNRELSYLLLSLVCFLSFLVFIGOPKWTSCMLRQAFGIFALSVSVCVLAKTMMVVI AFNATKPNSLRKKWGPGLNSIVLCTI I QIICIVWL  
ASAPPFPTEMMKSGITIECNEGSTTAFWCVLGYMGLLAIISFVAFARLNL PDSFNEAKFITFSMLVFSVWLAFAIPAYLSTGKYMVAVEIFAILASSAGLACIFFPKCYIILRPMNTRKSLMGKSKL  
>Coelacanth, locus346.1  
CLKCPDDQWSNELQHECIPKTIIEFLAYEDAGALATLSILCALSTTVLCIFIKYRNTPIVKANNRELSYLLLSLVCFLSFLVFIGOPKWTSCMLRQAFGIFALSVSVCVLAKTMMVVI AFNATKPNSLRKKWGPGLNSIVL  
CTVIQIICIVWLASAPPFPTEMMKSGIITIECNEGSTTAFWCVLGYMGLLAIISFVAFARLNL PDSFNEAKFITFSMLVFSVWLAFAIPAYLSTGKYMVAVEIFAILASSAGLACIFFPKCYIILRPMNTRKSLMGKSKL  
>Coelacanth, locus322.1  
-----  
MGSTLAVSIFCALSTTVLCIFIKYRNTPIVKANNRELSYLLLSLVCFLSFLVFIGOPKWTSCMLRQAFGIFALSVSVCVLAKTMMVVI AFNATKPNSLRKKWGPGLNSIVFVCTI I QIICIVWLASAPPFPTEMMKSGI  
ITIECNEGSTTAFWCVLGYMGLLAIISFVAFARLNL PDSFNEAKFITFSMLVFSVWLAFAIPAYLSTGKYMVAVEIFAILASSAGLACIFFPKCYIILRPMNTRKSLMGKSKL  
>Coelacanth, locus324.1  
CLKCPDDQWSNELQDQICPKTIEFLAYEDAMGTLATVLSILCALVSTTVLCIFIKYRNTPIVKANNRELSYLLLSLVCFLSFLVFIGOPKWTSCMLRQAFGIFALSVSVCVLAKTMMVVI AFNATKPNSLRKKWGPGLNSIVL  
CTAIQIICIVWLASAPPFPTEMMKSGIITIECNEGSTTAFWCVLGYMGLLAIISFVAFARLNL PDSFNEAKFITFSMLVFSVWLAFAIPAYLSTGKYMVAVEIFAILASSAGLACIFFPKCYIILRPMNTRKSLMGKSKL  
>Coelacanth, locus318.1  
-----  
MCDDQWSNERDQICPKTIEFLAYEDMGATLAVSIFCALSTTVLCIFIKYRNTPIVKANNRELSYLLLSLVCFLSFLVFIGOPKWTSCMLRQAFGIFALSVSVCVLAKTMMVVI AFNATKPNSLRKKWGPGLNSIVFVCTI  
GIFQIICIVWLANSYPPFAEKNTKSGITIECNEGSTTAFWCVLGYMGLLAIISFVAFARLNL PDSFNEAKFITFSMLVFSVWLAFAIPAYLSTGKYMVAVEIFAILASSAGLACIFFPKCYIILRPMNTRKSLMGKSKL  
>Coelacanth, locus268.1  
-----  
MGATLAVLSIFCALVCTAFICIFKQDTPVVKANNRELSYLLLSLVCFLSFLVFIGOPKWTSCMLRQAFGIFALSVSVCVLAKTMMVVI AFNATKPNSLRKKWGPGLNSIVLCTI I QIICIVWLASAPPFPTEMMKSGI  
ITIECNEGSTTAFWCVLGYMGLLAIISFVAFARLNL PDSFNEAKFITFSMLVFSVWLAFAIPAYLSTGKYMVAVEIFAILASSAGLACIFFPKCYIILRPMNTRKSLMGKSKL  
>Coelacanth, locus272.1  
-----  
MALVLCFLSFLVFIGOPKWTSCMLRQAFGIFALSVSVCVLAKTMMVVI AFNATKPNSLRKKWGPGLNSIVLCTI I QIICIVWLASAPPFPTEMMKSGI  
PFIQNMKSGI I QIICIVWLASAPPFPTEMMKSGIITIECNEGSTTAFWCVLGYMGLLAIISFVAFARLNL PDSFNEAKFITFSMLVFSVWLAFAIPAYLSTGKYMVAVEIFAILASSAGLACIFFPKCYIILRPMNTRKSLMGKSKL  
>Coelacanth, locus269.1  
-----  
MGAIVLAVSIVCAIIPAMTFWIFIKYRHTPIVKANNRELSYLLLSLVCFLSFLVFIGOPKWTSCMLRQAFGIFALSVSVCVLAKTMMVVI AFNATKPNSLRKKWGPGLNSIVLCTI I QIICIVWLASAPPFPTEMMKSGI  
ITIECNESGATFACVWGLYMLLAIISFVAFARLNL PDSFNEAKFITFSMLVFSVWLAFAIPAYLSTGKYMVAVEIFAILASSAGLACIFFPKCYIILRPMNTRKSLMGKSKL  
>Coelacanth, locus276.1  
-MKCPDDQWSNERDQICPKTIEFLAYEDAMGTLATVLSILCALVSTTVLCIFIKYRNTPIVKANNRELSYLLLSLVCFLSFLVFIGOPKWTSCMLRQAFGIFALSVSVCVLAKTMMVVI AFNATKPNSLRKKWGPGLNSIVL  
CTVIQIICIVWLASAPPFPTEMMKSGIITIECNEGSTTAFWCVLGYMGLLAIISFVAFARLNL PDSFNEAKFITFSMLVFSVWLAFAIPAYLSTGKYMVAVEIFAILASSAGLACIFFPKCYIILRPMNTRKSLMGKSKL  
>Coelacanth, locus270.1  
-----  
MGATLAAFSIFCSIIPAKALCIFIKYRDTPIVKANNRELSYLLLSLVCFLSFLVFIGOPKWTSCMLRQAFGIFALSVSVCVLAKTMMVVI AFNATKPNSLRKKWGPGLNSIVLCTI I QIICIVWLASAPPFPTEMMKSGI  
LITIECNESGATFACVWGLYMLLAIISFVAFARLNL PDSFNEAKFITFSMLVFSVWLAFAIPAYLSTGKYMVAVEIFAILASSAGLACIFFPKCYIILRPMNTRKSLMGKSKL  
>Coelacanth, locus271.1  
-MKCPDDQWSNERDQICPKTIEFLAYEDAMGTLATVLSILCALVSTTVLCIFIKYRNTPIVKANNRELSYLLLSLVCFLSFLVFIGOPKWTSCMLRQAFGIFALSVSVCVLAKTMMVVI AFNATKPNSLRKKWGPGLNSIVL  
CTI I QIICIVWLASAPPFPTEMMKSGIITIECNESGATFACVWGLYMLLAIISFVAFARLNL PDSFNEAKFITFSMLVFSVWLAFAIPAYLSTGKYMVAVEIFAILASSAGLACIFFPKCYIILRPMNTRKSLMGKSKL  
>Coelacanth, locus208.1  
CMKCPDDQWSNERDQICPKTIEFLAYEDMGATLAVSISCAASLTVLCIFIKYQDTPVVKANNRELSYLLLSLVCFLSFLVFIGOPKWTSCMLRQAFGIFALSVSVCVLAKTMMVVI AFNATKPNSLRKKWGPGLNSIVLCTI I  
CTI I QIICIVWLASAPPFPTEMMKSGIITIECNESGATFACVWGLYMLLAIISFVAFARLNL PDSFNEAKFITFSMLVFSVWLAFAIPAYLSTGKYMVAVEIFAILASSAGLACIFFPKCYIILRPMNTRKSLMGKSKL  
>Coelacanth, locus388.1  
-MKCPDDQWSNERDQICPKTIEFLAYEDMGATLAVSISCAASLTVLCIFIKYQDTPVVKANNRELSYLLLSLVCFLSFLVFIGOPKWTSCMLRQAFGIFALSVSVCVLAKTMMVVI AFNATKPNSLRKKWGPGLNSIVLCTI I  
CTI I QIICIVWLASAPPFPTEMMKSGIITIECNESGATFACVWGLYMLLAIISFVAFARLNL PDSFNEAKFITFSMLVFSVWLAFAIPAYLSTGKYMVAVEIFAILASSAGLACIFFPKCYIILRPMNTRKSLMGKSKL  
>Coelacanth, locus205.1  
-MKCPDDQWSNERDQICPKTIEFLAYEDMGATLAVSISCAASLTVLCIFIKYQDTPVVKANNRELSYLLLSLVCFLSFLVFIGOPKWTSCMLRQAFGIFALSVSVCVLAKTMMVVI AFNATKPNSLRKKWGPGLNSIVLCTI I  
STVFQV I C IAWLASSPPPEQNMKSGI I QIICIVWLASAPPFPTEMMKSGIITIECNESGATFACVWGLYMLLAIISFVAFARLNL PDSFNEAKFITFSMLVFSVWLAFAIPAYLSTGKYMVAVEIFAILASSAGLACIFFPKCYIILRPMNTRKSLMGKSKL  
>Coelacanth, locus203.1  
CLKCPDDQWSNERDQICPKTIEFLAYEDMGATLAVSISCAASLTVLCIFIKYRNTPIVKANNRELSYLLLSLVCFLSFLVFIGOPKWTSCMLRQAFGIFALSVSVCVLAKTMMVVI AFNATKPNSLRKKWGPGLNSIVLCTI I  
CSVIQV I C IAWLASSPPPEQNMKSGI I QIICIVWLASAPPFPTEMMKSGIITIECNESGATFACVWGLYMLLAIISFVAFARLNL PDSFNEAKFITFSMLVFSVWLAFAIPAYLSTGKYMVAVEIFAILASSAGLACIFFPKCYIILRPMNTRKSLMGKSKL  
>Coelacanth, locus201.1  
-----  
MGATLAVSIVSICASLSTTVLCIFIKYRDTPIVKANNRELSYLLLSLVCFLSFLVFIGOPKWTSCMLRQAFGIFALSVSVCVLAKTMMVVI AFNATKPNSLRKKWGPGLNSIVLCTI I QIICIVWLASAPPFPTEMMKSGI  
ITIECNESGATFACVWGLYMLLAIISFVAFARLNL PDSFNEAKFITFSMLVFSVWLAFAIPAYLSTGKYMVAVEIFAILASSAGLACIFFPKCYIILRPMNTRKSLMGKSKL  
>Coelacanth, locus200.1  
CLKCPDDQWSNERDQICPKTIEFLAYEDMGATLAVSISCAASLTVLCIFIKYRNTPIVKANNRELSYLLLSLVCFLSFLVFIGOPKWTSCMLRQAFGIFALSVSVCVLAKTMMVVI AFNATKPNSLRKKWGPGLNSIVLCTI I  
GTLIQ I I C IAWLASSPPPEQNMKSGI I QIICIVWLASAPPFPTEMMKSGIITIECNESGATFACVWGLYMLLAIISFVAFARLNL PDSFNEAKFITFSMLVFSVWLAFAIPAYLSTGKYMVAVEIFAILASSAGLACIFFPKCYIILRPMNTRKSLMGKSKL  
>Coelacanth, locus278.1  
CLKCPDDQWSNERDQICPKTIEFLAYEDMGATLAVSISCAASLTVLCIFIKYRNTPIVKANNRELSYLLLSLVCFLSFLVFIGOPKWTSCMLRQAFGIFALSVSVCVLAKTMMVVI AFNATKPNSLRKKWGPGLNSIVLCTI I  
CTI I QIICIVWLASAPPFPTEMMKSGI I QIICIVWLASAPPFPTEMMKSGIITIECNESGATFACVWGLYMLLAIISFVAFARLNL PDSFNEAKFITFSMLVFSVWLAFAIPAYLSTGKYMVAVEIFAILASSAGLACIFFPKCYIILRPMNTRKSLMGKSKL  
>Coelacanth, locus277.1  
CLKSDQWSNERDQICPKTIEFLAYEDMGATLAVSISCAASLTVLCIFIKYRNTPIVKANNRELSYLLLSLVCFLSFLVFIGOPKWTSCMLRQAFGIFALSVSVCVLAKTMMVVI AFNATKPNSLRKKWGPGLNSIVLCTI I  
TKLILCQAFGIFALSVSVCVLAKTMMVVI AFNATKPNSLRKKWGPGLNSIVLCTI I QIICIVWLASAPPFPTEMMKSGI I QIICIVWLASAPPFPTEMMKSGIITIECNESGATFACVWGLYMLLAIISFVAFARLNL PDSFNEAKFITFSMLVFSVWLAFAIP  
AYLSTRGLYMAVEIFAILASSYLLTH-----  
>Coelacanth, locus131.1



CLKCPDDHWSNEKQDACIEKTEFLSYQESLGAALATISIFCATIPAVLVAIFIKYQETPIVKANNRELSYLLSALMLGFLCCLMFIGKPRRATCIRQTAFGVIFAFVSVCLVAKTMMVIAFNAFKPNSLRKWKVGPGLPNSIVLA  
CTVIQVVICVAVLVSPPPPIDNMKSOVQVGIIECEGSESPAFWCLVGMGLLAIISFVAVLARNLPDSFNEAKFITFMSLVFVSVWLAFLAPAYLSTRGKYMVAVEIFAILASSAGLPCIFFPKCYIILLKPDNTRDYLGMKGGD  
>Coelacanth, locus349.1  
CLCKTDEWSNEGDDKIPKLDIDLYSIEEPMGIILTVISISFTFFPMLCLCFIKYRDTPLVKANNRELSYLLLVGLMFLCCLLFIGQPSVNCMMRQTAFIGIIFALCVSVLAKTMMVIAFNAFKPNSLRKWKVGPGLPNSIVVFF  
CTLIQIIICIAWLSAPPPEQDKMSEIGMIIEKNEGSTTAFWCLVGMGLLAIISFVAVLARNLPDSFNEAKFITFMSLVFVSVWLAFLAPAYLSTRGKYMVAVEIFAILASSAGLPCIFFPKCYIILLKPDNTRDYLGMKGGT  
>Coelacanth, locus347.1

MGTTLVAISICALPFAVILHMCIKHRHTPLVKANNRELSYLLFALVLAFLCCLIFIGQPRWTWMMRQTAFIGIIFALCVSVLAKTMMVIAFNAFKPNSLRKWKVGRSLPNSIVFVCTVIQVVICITWLSYPPFPEDQTKSIOG  
IITQNEGSSAFWCLVGMGLLAIISFVAVLARNLPDSFNEAKFITFMSLVFVSVWLAFLAPAYLSTRGKYMVAVEIFAILASSAGLPCIFFPKCYIILLKPDNTRDYLGMKGGT  
>Coelacanth, locus136.1  
---MCPDDHWSNERDCKIPKTEFLSYEDPMGVALTAIAIISLLPAAIPCFVFKYRDTPLVKANNRELSYLLLVGLMFLCCLLFIGHPTVVTMFRQIAGIIFTLVSVCLVAKTMMVIAFNAFKPNSLRKWKV----  
LPNTVALVCTLIQVVICITWLSYPPFPVQNMKSIGTIIIECNDGSTTFFWVCLVGMGLLAIISFVAVLARNLPDSFNEAKFITFMSLVFVSVWLAFLAPAYLSTRGKYMVAVEIFAILASSAGLPCIFFPKCYIILLKPDNTRDYLGMKGGT  
>Coelacanth, locus209.1

MCPDDHWSNERDCEILKATEFLSYRDPMGATLAAISIFCALFPATLICIFIKYRDTPLVKANNRELSYLLLVGLMFLCCLLFIGLPTITMFRQVAFIIFALCVSVLAKTMMVIAFHATIPSSLKRKWKVGPGLPNTIVFICT  
VIQVVICITWLSYPPFPVQNMKSIGTIIIECNDGSTTFFWVCLVGMGLLAIISFVAVLARNLPDSFNEAKFITFMSLVFVSVWLAFLAPAYLSTRGKYMVAVEIFAILASSAGLPCIFFPKCYIILLKPDNTRDYLGMKGGT  
>Coelacanth, locus132.1  
-----  
MGATLATISISIALPTVITLLFIKHRDTAVKANNRELSYLLLVGLMFLCCLLFIGHPTWTCVLRQVAFIIFALCVSVLAKTMMVIAFNAFKPNSLRKWKVGPGLPNSIVFVCTVIQVVICIAWLSYPPFPVQNMKSIOG  
IITQNEGSSAFWCLVGMGLLAIISFVAVLARNLPDSFNEAKFITFMSLVFVSVWLAFLAPAYLSTRGKYMVAVEIFAILASSAGLPCIFFPKCYIILLKPDNTRDYLGMKGGT  
>Coelacanth, locus375.1

MGVALAISIFCALPFAVILHMCIKHRHTPLVKANNRELSYLLLVGLMFLCCLLFIGRPRKVTMLRQVAFIIFVLCVSVLAKTMMVIAFNAFKPNSLRKWKVGPGLPNTIVFCTIIQVVICIAWLSYPPFPVQNMKSIOG  
IITQNEGSSAFWCLVGMGLLAIISFVAVLARNLPDSFNEAKFITFMSLVFVSVWLAFLAPAYLSTRGKYMVAVEIFAILASSAGLPCIFFPKCYIILLKPDNTRDYLGMKGGT  
>Coelacanth, locus301.1  
-----  
MGVTLASISIFALPVTIYIFIKNRHTPLVKANNRELSYLLLVGLMFLCCLLFIGNPRSVACMLRQVAFIIFVLCVSVLAKTMMVIAFNAFKPNSLRKWKVGPGLPNTIVFCTIIQVVICIAWLSYPPFPVQNMKSIOG  
IITQNEGSSAFWCLVGMGLLAIISFVAVLARNLPDSFNEAKFITFMSLVFVSVWLAFLAPAYLSTRGKYMVAVEIFAILASSAGLPCIFFPKCYIILLKPDNTRDYLGMKGGT  
>Coelacanth, locus351.1

MGATLAAISIFAALITAATLCTFIKYRDTPLVKANNRELSYLLLVGLMFLCCLLFIGYPMRVTMLRQVAFIIFVLCVSVLAKTMMVIAFNAFKPNSLRKWKVGPGLPNTIVFCTIIQVVICIAWLSYPPFPVQNMKSIOG  
IITQNEGSSAFWCLVGMGLLAIISFVAVLARNLPDSFNEAKFITFMSLVFVSVWLAFLAPAYLSTRGKYMVAVEIFAILASSAGLPCIFFPKCYIILLKPDNTRDYLGMKGGT  
>Coelacanth, locus262.1  
CLKCLDDYMANEAQRDCKIPKSEFLSFDPMGATLTSVIFGALITAATLCTFIKYRDTPLVKANNRELSYLLLVGLMFLCCLLFIGYPMRVTMLRQVAFIIFVLCVSVLAKTMMVIAFNAFKPNSLRKWKVGPGLPNTIVFCTIIQVVICIAWLSYPPFPVQNMKSIOG  
IITQNEGSSAFWCLVGMGLLAIISFVAVLARNLPDSFNEAKFITFMSLVFVSVWLAFLAPAYLSTRGKYMVAVEIFAILASSAGLPCIFFPKCYIILLKPDNTRDYLGMKGGT  
>Coelacanth, locus141.1

MGATLTSVSISSVALITATTLTIFIKYRDTPLVKANNRELSYLLLVGLMFLCCLLFIGYPMRVTMLRQVAFIIFVLCVSVLAKTMMVIAFNAFKPNSLRKWKVGPGLPNTIVFCTIIQVVICIAWLSYPPFPVQNMKSIOG  
IITQNEGSSAFWCLVGMGLLAIISFVAVLARNLPDSFNEAKFITFMSLVFVSVWLAFLAPAYLSTRGKYMVAVEIFAILASSAGLPCIFFPKCYIILLKPDNTRDYLGMKGGT  
>Coelacanth, locus374.1  
-----  
MGATLTSVSISSVALITATTLTIFIKYRDTPLVKANNRELSYLLLVGLMFLCCLLFIGYPMRVTMLRQVAFIIFVLCVSVLAKTMMVIAFNAFKPNSLRKWKVGPGLPNTIVFCTIIQVVICIAWLSYPPFPVQNMKSIOG  
IITQNEGSSAFWCLVGMGLLAIISFVAVLARNLPDSFNEAKFITFMSLVFVSVWLAFLAPAYLSTRGKYMVAVEIFAILASSAGLPCIFFPKCYIILLKPDNTRDYLGMKGGT  
>Coelacanth, locus145.1  
CQKCPDDYWSNEAQRDCKIPKSIDFLSYEDPMGATLTSVIFAALITAATLCTFIKYRDTPLVKANNRELSYLLLVGLMFLCCLLFIGYPMRVTMLRQVAFIIFVLCVSVLAKTMMVIAFNAFKPNSLRKWKVGPGLPNTIVFCTIIQVVICIAWLSYPPFPVQNMKSIOG  
IITQNEGSSAFWCLVGMGLLAIISFVAVLARNLPDSFNEAKFITFMSLVFVSVWLAFLAPAYLSTRGKYMVAVEIFAILASSAGLPCIFFPKCYIILLKPDNTRDYLGMKGGT  
>Coelacanth, locus147.1  
CQKCPDDYWSNEAQRDCKIPKSIDFLSYEDPMGATLTSVIFAALITAATLCTFIKYRDTPLVKANNRELSYLLLVGLMFLCCLLFIGYPMRVTMLRQVAFIIFVLCVSVLAKTMMVIAFNAFKPNSLRKWKVGPGLPNTIVFCTIIQVVICIAWLSYPPFPVQNMKSIOG  
IITQNEGSSAFWCLVGMGLLAIISFVAVLARNLPDSFNEAKFITFMSLVFVSVWLAFLAPAYLSTRGKYMVAVEIFAILASSAGLPCIFFPKCYIILLKPDNTRDYLGMKGGT  
>Coelacanth, locus380.1  
CLKCPDDHWSNERDCKIPKSEFLSFDPMGATLTSVISAVALITATTLTIFIKYRDTPLVKANNRELSYLLLVGLMFLCCLLFIGYPMRVTMLRQVAFIIFVLCVSVLAKTMMVIAFNAFKPNSLRKWKVGPGLPNTIVFCTIIQVVICIAWLSYPPFPVQNMKSIOG  
IITQNEGSSAFWCLVGMGLLAIISFVAVLARNLPDSFNEAKFITFMSLVFVSVWLAFLAPAYLSTRGKYMVAVEIFAILASSAGLPCIFFPKCYIILLKPDNTRDYLGMKGGT  
>Coelacanth, locus341.1  
CLKCPDDHWSNERDCKIPKSEFLSFDPMGATLTSVISAVALITATTLTIFIKYRDTPLVKANNRELSYLLLVGLMFLCCLLFIGYPMRVTMLRQVAFIIFVLCVSVLAKTMMVIAFNAFKPNSLRKWKVGPGLPNTIVFCTIIQVVICIAWLSYPPFPVQNMKSIOG  
IITQNEGSSAFWCLVGMGLLAIISFVAVLARNLPDSFNEAKFITFMSLVFVSVWLAFLAPAYLSTRGKYMVAVEIFAILASSAGLPCIFFPKCYIILLKPDNTRDYLGMKGGT  
>Coelacanth, locus353.1  
CLKCPDDHWSNERDCKIPKSEFLSFDPMGATLTSVISAVALITATTLTIFIKYRDTPLVKANNRELSYLLLVGLMFLCCLLFIGYPMRVTMLRQVAFIIFVLCVSVLAKTMMVIAFNAFKPNSLRKWKVGPGLPNTIVFCTIIQVVICIAWLSYPPFPVQNMKSIOG  
IITQNEGSSAFWCLVGMGLLAIISFVAVLARNLPDSFNEAKFITFMSLVFVSVWLAFLAPAYLSTRGKYMVAVEIFAILASSAGLPCIFFPKCYIILLKPDNTRDYLGMKGGT  
>Coelacanth, locus392.1  
CLKCPDDHWSNERDCKIPKSEFLSFDPMGATLTSVISAVALITATTLTIFIKYRDTPLVKANNRELSYLLLVGLMFLCCLLFIGYPMRVTMLRQVAFIIFVLCVSVLAKTMMVIAFNAFKPNSLRKWKVGPGLPNTIVFCTIIQVVICIAWLSYPPFPVQNMKSIOG  
IITQNEGSSAFWCLVGMGLLAIISFVAVLARNLPDSFNEAKFITFMSLVFVSVWLAFLAPAYLSTRGKYMVAVEIFAILASSAGLPCIFFPKCYIILLKPDNTRDYLGMKGGT  
>Coelacanth, locus36976.1  
CQKCPDDYWSNEAQRDCKIPKSEFLSFDPMGATLTSVIFAALITAATLCTFIKYRDTPLVKANNRELSYLLLVGLMFLCCLLFIGYPMRVTMLRQVAFIIFVLCVSVLAKTMMVIAFNAFKPNSLRKWKVGPGLPNTIVFCTIIQVVICIAWLSYPPFPVQNMKSIOG  
IITQNEGSSAFWCLVGMGLLAIISFVAVLARNLPDSFNEAKFITFMSLVFVSVWLAFLAPAYLSTRGKYMVAVEIFAILASSAGLPCIFFPKCYIILLKPDNTRDYLGMKGGT  
>Coelacanth, locus36981.1  
CQKCPDDYWSNEAQRDCKIPKSEFLSFDPMGATLTSVIFAALITAATLCTFIKYRDTPLVKANNRELSYLLLVGLMFLCCLLFIGYPMRVTMLRQVAFIIFVLCVSVLAKTMMVIAFNAFKPNSLRKWKVGPGLPNTIVFCTIIQVVICIAWLSYPPFPVQNMKSIOG  
IITQNEGSSAFWCLVGMGLLAIISFVAVLARNLPDSFNEAKFITFMSLVFVSVWLAFLAPAYLSTRGKYMVAVEIFAILASSAGLPCIFFPKCYIILLKPDNTRDYLGMKGGT  
>Coelacanth, locus36974.1  
CQKCPDDYWSNEAQRDCKIPKSEFLSFDPMGATLTSVIFAALITAATLCTFIKYRDTPLVKANNRELSYLLLVGLMFLCCLLFIGYPMRVTMLRQVAFIIFVLCVSVLAKTMMVIAFNAFKPNSLRKWKVGPGLPNTIVFCTIIQVVICIAWLSYPPFPVQNMKSIOG  
IITQNEGSSAFWCLVGMGLLAIISFVAVLARNLPDSFNEAKFITFMSLVFVSVWLAFLAPAYLSTRGKYMVAVEIFAILASSAGLPCIFFPKCYIILLKPDNTRDYLGMKGGT  
>Coelacanth, locus438.1  
CLRCPDQWSNTRDQACVPRVLEFLSYEELGASLAVLAVLSPASVGLVFLRHRHSPVVKANNRQLSYVLLGALALCPLCLLFIGRPSASCMRLQTAFAIIVTLGVSCLVAKTMMVIAFNAFKPNSLRKWKVGPGLPNTIVFCTIIQVVICIAWLSYPPFPVQNMKSIOG  
IITQNEGSSAFWCLVGMGLLAIISFVAVLARNLPDSFNEAKFITFMSLVFVSVWLAFLAPAYLSTRGKYMVAVEIFAILASSAGLPCIFFPKCYIILLKPDNTRDYLGMKGGT  
>Coelacanth, locus416.1  
CLRCPDQWSNTRDQACVPRVLEFLSYEELGASLAVLAVLSPASVGLVFLRHRHSPVVKANNRQLSYVLLGALALCPLCLLFIGRPSASCMRLQTAFAIIVTLGVSCLVAKTMMVIAFNAFKPNSLRKWKVGPGLPNTIVFCTIIQVVICIAWLSYPPFPVQNMKSIOG  
IITQNEGSSAFWCLVGMGLLAIISFVAVLARNLPDSFNEAKFITFMSLVFVSVWLAFLAPAYLSTRGKYMVAVEIFAILASSAGLPCIFFPKCYIILLKPDNTRDYLGMKGGT  
>Coelacanth, locus410.1

XLPASTLALFLWHHTPIVKANNRQLSYVLLCALALCPLCLLFIGIPSPASCMRLQTAFAIIFALSVCVLAKTMMVIAFNAFKPNSLRKWKVGPGLPNTIVFCTIIQVVICIAWLSYPPFPVQNMKSIOG  
IITQNEGSSAFWCLVGMGLLAIISFVAVLARNLPDSFNEAKFITFMSLVFVSVWLAFLAPAYLSTRGKYMVAVEIFAILASSAGLPCIFFPKCYIILLKPDNTRDYLGMKGGT  
>Reefish, locus56974.1

MVEFLSYSEPLGIVLAVLSIVSVKPSILGLFWYRHTPIVKANNRQLSYVLLCALALCPLCLLFIGIPSPASCMRLQTAFAIIFALSVCVLAKTMMVIAFNAFKPNSLRKWKVGPGLPNTIVFCTIIQVVICIAWLSYPPFPVQNMKSIOG  
IITQNEGSSAFWCLVGMGLLAIISFVAVLARNLPDSFNEAKFITFMSLVFVSVWLAFLAPAYLSTRGKYMVAVEIFAILASSAGLPCIFFPKCYIILLKPDNTRDYLGMKGGT  
>Reefish, locus56973.1  
-----  
MVEFLSFDPELIVLIMSMLISLVKPSILGLFWYRHTPIVKANNRQLSYVLLCALALCPLCLLFIGIPSPASCMRLQTAFAIIFALSVCVLAKTMMVIAFNAFKPNSLRKWKVGPGLPNTIVFCTIIQVVICIAWLSYPPFPVQNMKSIOG  
IITQNEGSSAFWCLVGMGLLAIISFVAVLARNLPDSFNEAKFITFMSLVFVSVWLAFLAPAYLSTRGKYMVAVEIFAILASSAGLPCIFFPKCYIILLKPDNTRDYLGMKGGT  
>Reefish, locus56889.1  
CLRCPDDHWSNKRNACIPKVEFLSYEELGTTLASVLTSTVPSLILCFVMMHGDTPVVKANNRQLSYVLLCALALCPLCLLFIGIPSPASCMRLQTAFAIIFALSVCVLAKTMMVIAFNAFKPNSLRKWKVGPGLPNTIVFCTIIQVVICIAWLSYPPFPVQNMKSIOG  
IITQNEGSSAFWCLVGMGLLAIISFVAVLARNLPDSFNEAKFITFMSLVFVSVWLAFLAPAYLSTRGKYMVAVEIFAILASSAGLPCIFFPKCYIILLKPDNTRDYLGMKGGT  
>Western\_clawed\_frog, locus416.1  
CFPCTDETPNEGRTECLPKPVDLSEFEELGTTITTTIFSYISTVTLICVFIKRYKDTAVKANNRDTYVLLGSLSLFCLPLLFIGQPHRFTCLFRQVTFGVIFVLSVCVLAKTMMVIAFNAFKPNSLRKWKVGPGLPNTIVFCTIIQVVICIAWLSYPPFPVQNMKSIOG  
IITQNEGSSAFWCLVGMGLLAIISFVAVLARNLPDSFNEAKFITFMSLVFVSVWLAFLAPAYLSTRGKYMVAVEIFAILASSAGLPCIFFPKCYIILLKPDNTRDYLGMKGGT  
>Zebrafish, locus509.1  
CHKCPDYPNAEKIKCLPKPVEFLSDEILGNTLAAFSIAGSLVALSMALVFKYKNSPIVRANNSLSLFLLSLTLCLCCLLFIGQPTWESCMRLHTAFGITFVLCISCVLGTIVVMAFAKATLPGSNMVKWFGPPQRLSVFGFTL  
VLIQVVICIAWLSYPPFPVQNMKSIOG IITQNEGSSAFWCLVGMGLLAIISFVAVLARNLPDSFNEAKFITFMSLVFVSVWLAFLAPAYLSTRGKYMVAVEIFAILASSAGLPCIFFPKCYIILLKPDNTRDYLGMKGGT  
>marker, zebrafish\_4\_1\_F

QPDYWPNAEKIKCLPKPVEFLSDEILGNTLAAFSIAGSLVALSMALVFKYKNSPIVRANNSLSLFLLSLTLCLCCLLFIGQPTWESCMRLHTAFGITFVLCISCVLGTIVVMAFAKATLPGSNMVKWFGPPQRLSVFGFTL  
VLIQVVICIAWLSYPPFPVQNMKSIOG IITQNEGSSAFWCLVGMGLLAIISFVAVLARNLPDSFNEAKFITFMSLVFVSVWLAFLAPAYLSTRGKYMVAVEIFAILASSAGLPCIFFPKCYIILLKPDNTRDYLGMKGGT  
>Zebrafish, locus848.1  
CHKCPDYPNAEKIKCLPKPVEFLSDEILGNTLAAFSIAGSLVALSMALVFKYKNSPIVRANNSLSLFLLSLTLCLCCLLFIGQPTWESCMRLHTAFGITFVLCISCVLGTIVVMAFAKATLPGSNMVKWFGPPQRLSVFGFTL  
VLIQVVICIAWLSYPPFPVQNMKSIOG IITQNEGSSAFWCLVGMGLLAIISFVAVLARNLPDSFNEAKFITFMSLVFVSVWLAFLAPAYLSTRGKYMVAVEIFAILASSAGLPCIFFPKCYIILLKPDNTRDYLGMKGGT  
>Zebrafish, locus852.1  
CHELSDYWPNAEKIKCLPKPVEFLSDEILGNTLAAFSIAGSLVALSMALVFKYKNSPIVRANNSLSLFLLSLTLCLCCLLFIGQPTWESCMRLHTAFGITFVLCISCVLGTIVVMAFAKATLPGSNMVKWFGPPQRLSVFGFTL  
VLIQVVICIAWLSYPPFPVQNMKSIOG IITQNEGSSAFWCLVGMGLLAIISFVAVLARNLPDSFNEAKFITFMSLVFVSVWLAFLAPAYLSTRGKYMVAVEIFAILASSAGLPCIFFPKCYIILLKPDNTRDYLGMKGGT  
>Zebrafish, locus513.1  
CHELSDYWPNAEKIKCLPKPVEFLSDEILGNTLAAFSIAGSLVALSMALVFKYKNSPIVRANNSLSLFLLSLTLCLCCLLFIGQPTWESCMRLHTAFGITFVLCISCVLGTIVVMAFAKATLPGSNMVKWFGPPQRLSVFGFTL  
VLIQVVICIAWLSYPPFPVQNMKSIOG IITQNEGSSAFWCLVGMGLLAIISFVAVLARNLPDSFNEAKFITFMSLVFVSVWLAFLAPAYLSTRGKYMVAVEIFAILASSAGLPCIFFPKCYIILLKPDNTRDYLGMKGGT  
>Zebrafish, locus850.1  
CDKCPDYPNAEKIKCLPKPVEFLSDEILGNTLAAFSIAGSLVALSMALVFKYKNSPIVRANNSLSLFLLSLTLCLCCLLFIGQPTWESCMRLHTAFGITFVLCISCVLGTIVVMAFAKATLPGSNMVKWFGPPQRLSVFGFTL  
VLIQVVICIAWLSYPPFPVQNMKSIOG IITQNEGSSAFWCLVGMGLLAIISFVAVLARNLPDSFNEAKFITFMSLVFVSVWLAFLAPAYLSTRGKYMVAVEIFAILASSAGLPCIFFPKCYIILLKPDNTRDYLGMKGGT  
>Zebrafish, locus511.1  
CDKCPDYPNAEKIKCLPKPVEFLSDEILGNTLAAFSIAGSLVALSMALVFKYKNSPIVRANNSLSLFLLSLTLCLCCLLFIGQPTWESCMRLHTAFGITFVLCISCVLGTIVVMAFAKATLPGSNMVKWFGPPQRLSVFGFTL  
VLIQVVICIAWLSYPPFPVQNMKSIOG IITQNEGSSAFWCLVGMGLLAIISFVAVLARNLPDSFNEAKFITFMSLVFVSVWLAFLAPAYLSTRGKYMVAVEIFAILASSAGLPCIFFPKCYIILLKPDNTRDYLGMKGGT  
>marker, cichlid\_4-10aa



























IILECAVGSVLGFWGVGLGILLACLCFFIAFLARLKLDPNFNEAKITFSMLIFFAWITFVPAYVSTPGKYTVAQVFAILASAFGLLSCIFAPKCYIILLRPEKNSKKYLMDSKNK  
>Coelacanth, locus26.1

MGITLTVIAVFGASVTTAVSIVFFNFKNTPIVRANMELSFLLLSLILCFLCALAFIGEPTTWSMIRQTVFGISFVLCISCILGKTVVLMFAKNRPLSSNTMWFQPPQQRASVFLTTVIOVICIIWLVNTPPPFSQNSVHOSAK  
IILECNMGSALACLVLVGLLACTGCFCLAFARLKLDPNFNEAKITFSMLIFFAWITFIPAYVSTPGKYTVAEIFAIFAILSTGLLLCIFAPKCYIILLKPEKNTKXHLMDKVPV  
>Ccloudy\_catshark, locus14.1

MGITLAVISLFGACITGVAVVFLYFNTPIVRANSELSFLLLSLILCFLCSIAFIGQPTPWSMVRHTVFGVSFVLCISCILSKTLVLMFAKATLPSNMWKFQPKQORSIVFLCTLIQIIICVILVTSPLPKNTKYQSAK  
IILECDVSTVAFVCLVYIGLLACMLCLIFALARLKLDPNFNEAKITFSMLIFFAWITFIPAYVSTPGKYTVAEIFAIFAILSSFGLLCIFAPKCYIILLKPEKNTKXHLMDKXHAQ  
>Ccloudy\_catshark, locus12.1

MGITLAAISLIGACITGVAVVFLYFNTPIVRANSELSFLLLSLILCFLCSIAFIGQPTPWSMVRHTVFGVSFVLCISCILSKTLVLMFAKATLPSNMWKFQPKQORSIVFLCTLIQIIICVILVTSPLPKNTKYQSAK  
IILECDVSTVAFVCLVYIGLLACMLCLIFALARLKLDPNFNEAKITFSMLIFFAWITFIPAYVSTPGKYTVAEIFAIFAILSSFGLLCIFAPKCYIILLKPEKNTKXHLMDKXHAQ  
>Ccloudy\_catshark, locus8.1  
CLRCSDIOWSNKNEKICPRENEYSFODGIGITLAAISLFGACITVVAIVFLCVNTPIVRANSELSFLLLSLILCFLCSIAFIGQPTPWSMVRHTVFGVSFVLCISCILSKTLVLMFAKATLPSNMWKFQPKQORSIVFL  
CTLIQIIICVILVTSPLPKNTKYQSAKILECDVSTVAFVCLVYIGLLACMLCLIFALARLKLDPNFNEAKITFSMLIFFAWITFIPAYVSTPGKYTVAEIFAIFAILSSFGLLCIFAPKCYIILLKPEKNTKXHLMDKXHAQ  
>Ccloudy\_catshark, locus10.1  
CLICPLQOWSNERRDQCPKQOVLEFSYDTHGMLTAVSLFGACITGVAVVFLYFNTPIVRANSELSFLLLSLILCFLCSIAFIGQPTTWSMVRHTVFGVSFVLCISCILSKTLVLMFAKATLPSNMWKFQPKQORSIVFL  
CTLIQIIICVILVTSPLPKNTKYQSAKILECDVSTVAFVCLVYIGLLACMLCLIFALARLKLDPNFNEAKITFSMLIFFAWITFIPAYVSTPGKYTVAEIFAIFAILSSFGLLCIFAPKCYIILLKPEKNTKXHLMDKXHAQ  
>Whale\_shark, locus9.1

MGITLTAISLIGACITGAVAVVFLYFNTPIVKANSELSFLLLSLILCFLCSIAFIGQPSHVMQHTVFGVSFVLCISCILGKTLVLMFAKATLPGSDVMWKFQPKQORSIVFICALIOVICVILVTSPLPKNTKYQNEK  
IILECGVSTVAVSVFVYIGLLGICLCLIFALARLKLDPNFNEAKITFSMLIFFAWITFIPAYVSTPGKYTVAEIFAIFAILSSFGLLCIFSCKCYIILLKPEKNTKXHLMDKXHAQ  
>Brownbanded\_bambooshark, locus200.1

MGITLTVISLGLAVSAAVFLHFNTPIVRANSELSFLLLSLILCFLCSIAFIGQPSHVMQHTVFGVSFVLCISCILGKTLVLMFAKATLPGSDVMWKFQPKQORSIVFICALIOVICVILVTSPLPKNTKYQNEK  
IILECDVSTVAFVCLVYIGLLGICLCLIFALARLKLDPNFNEAKITFSMLIFFAWITFIPAYVSTPGKYTVAEIFAIFAILSSFGLLCIFSCKCYIILLKPEKNTKXHLMDKXHAQ  
>Brownbanded\_bambooshark, locus198.1  
-MKCSLDYWSNDRNNECIPKENEYSFODGIGIALTVLTLGACITVAVAVFLHFNTPIVKANSELSFLLLSLILCFLCSIAFIGQPSHVMQHTVFGVSFVLCISCILGKTLVLMFAKATLPGSDVMWKFQPKQORSIVFL  
STLIQIIICVILVTSPLPKNTKYQSAKILECSGSIACVFGYIGLLACFLMFLARLKLDPNFNEAKITFSMLIFFAWITFIPAYVSTPGKYTVAEIFAIFAILSSFGLLCIFSCKCYIILLKPEKNTKXHLMDKXHAQ  
>Reedfish, locus40409.1

MGITLTAISLIGACITGAVAVVFLYFNTPIVKANSELSFLLLSLILCFLCSIAFIGQPSHVMQHTVFGVSFVLCISCILGKTLVLMFAKATLPGSDVMWKFQPKQORSIVFICALIOVICVILVTSPLPKNTKYQNEK  
IILECHVSTVAFVCLVYIGLLGICLCLIFALARLKLDPNFNEAKITFSMLIFFAWITFIPAYVSTPGKYTVAEIFAIFAILSSFGLLCIFSCKCYIILLKPEKNTKXHLMDKXHAQ  
>Sterlet, locus288.1

MGITLMSVSLGSCFTIAAIVFAYRNTPIVKNSELSFLLLSLILCFLCSIAFIGQPTTWSMVRHTVFGIAFVLCISCILGKTVLVMFAKATLPGSDVMWKFQPKQORSIVFICALIOVICVILVTSPLPKNTKYQNEK  
IILECDVSTVAFVCLVYIGLLGICLCLIFALARLKLDPNFNEAKITFSMLIFFAWITFIPAYVSTPGKYTVAEIFAIFAILSSFGLLCIFSCKCYIILLKPEKNTKXHLMDKXHAQ  
>Elephant\_shark, locus206.1  
CICKLDYWSNDRNNECIPKENEYSFODGIGIALTVLTLGACITVAVAVFLHFNTPIVKANSELSFLLLSLILCFLCSIAFIGQPSHVMQHTVFGVSFVLCISCILGKTLVLMFAKATLPGSDVMWKFQPKQORSIVFL  
STLIQIIICVILVTSPLPKNTKYQSAKILECSGSIACVFGYIGLLACFLMFLARLKLDPNFNEAKITFSMLIFFAWITFIPAYVSTPGKYTVAEIFAIFAILSSFGLLCIFSCKCYIILLKPEKNTKXHLMDKXHAQ  
>Ccloudy\_catshark, locus7.1  
CICKLDYWSNDRNNECIPKENEYSFODGIGIALTVLTLGACITVAVAVFLHFNTPIVKANSELSFLLLSLILCFLCSIAFIGQPSHVMQHTVFGVSFVLCISCILGKTLVLMFAKATLPGSDVMWKFQPKQORSIVFL  
STLIQIIICVILVTSPLPKNTKYQSAKILECSGSIACVFGYIGLLACFLMFLARLKLDPNFNEAKITFSMLIFFAWITFIPAYVSTPGKYTVAEIFAIFAILSSFGLLCIFSCKCYIILLKPEKNTKXHLMDKXHAQ  
>Elephant\_shark, locus28.1  
CICKLDYWSNDRNNECIPKENEYSFODGIGIALTVLTLGACITVAVAVFLHFNTPIVKANSELSFLLLSLILCFLCSIAFIGQPSHVMQHTVFGVSFVLCISCILGKTLVLMFAKATLPGSDVMWKFQPKQORSIVFL  
STLIQIIICVILVTSPLPKNTKYQSAKILECSGSIACVFGYIGLLACFLMFLARLKLDPNFNEAKITFSMLIFFAWITFIPAYVSTPGKYTVAEIFAIFAILSSFGLLCIFSCKCYIILLKPEKNTKXHLMDKXHAQ  
>Small-eyed\_rabbitfish, locus66.1  
-MQCPEDYWSNDRNNECIPKENEYSFODGIGIALTVLTLGACITVAVAVFLHFNTPIVKANSELSFLLLSLILCFLCSIAFIGQPSHVMQHTVFGVSFVLCISCILGKTLVLMFAKATLPGSDVMWKFQPKQORSIVFL  
STLIQIIICVILVTSPLPKNTKYQSAKILECSGSIACVFGYIGLLACFLMFLARLKLDPNFNEAKITFSMLIFFAWITFIPAYVSTPGKYTVAEIFAIFAILSSFGLLCIFSCKCYIILLKPEKNTKXHLMDKXHAQ  
>Sterlet, locus295.1  
CICKLDYWSNDRNNECIPKENEYSFODGIGIALTVLTLGACITVAVAVFLHFNTPIVKANSELSFLLLSLILCFLCSIAFIGQPSHVMQHTVFGVSFVLCISCILGKTLVLMFAKATLPGSDVMWKFQPKQORSIVFL  
STLIQIIICVILVTSPLPKNTKYQSAKILECSGSIACVFGYIGLLACFLMFLARLKLDPNFNEAKITFSMLIFFAWITFIPAYVSTPGKYTVAEIFAIFAILSSFGLLCIFSCKCYIILLKPEKNTKXHLMDKXHAQ  
>Western\_c\_lawed\_frog, locus569.1

MDFLSFEELGITFVSLAVIGISQTLAVVVFIKHITPIVRAHNIEMSFLLFSLILCFLSSLTFIGKPSGLCRLQTVFGVSFVLCISCILVKTLLVLAFTMSKPNQNMWKFQPKQORSIVFICALIOVICVILVTSPLPKNTKYQNEK  
IILECDVSTVAFVCLVYIGLLGICLCLIFALARLKLDPNFNEAKITFSMLIFFAWITFIPAYVSTPGKYTVAEIFAIFAILSSFGLLCIFSCKCYIILLKPEKNTKXHLMDKXHAQ  
>Mouse, locus33.1  
CDPCGEDDWSNAEKSKVCPKHEFLAYEALGFTLVLSIFGALVLAIVVYVHRHTPLVKANDRELSFLIQMSLITVLSLIFIGKPCNMWCMARQITLALGFLCCLSSILGKTLVLMFAKATLPGSDVMWKFQPKQORSIVFL  
STLIQIIICVILVTSPLPKNTKYQSAKILECSGSIACVFGYIGLLACFLMFLARLKLDPNFNEAKITFSMLIFFAWITFIPAYVSTPGKYTVAEIFAIFAILSSFGLLCIFSCKCYIILLKPEKNTKXHLMDKXHAQ  
>Mouse, locus28.1  
CDPCGEDDWSNAEKSKVCPKHEFLAYEALGFTLVLSIFGALVLAIVVYVHRHTPLVKANDRELSFLIQMSLITVLSLIFIGKPCNMWCMARQITLALGFLCCLSSILGKTLVLMFAKATLPGSDVMWKFQPKQORSIVFL  
STLIQIIICVILVTSPLPKNTKYQSAKILECSGSIACVFGYIGLLACFLMFLARLKLDPNFNEAKITFSMLIFFAWITFIPAYVSTPGKYTVAEIFAIFAILSSFGLLCIFSCKCYIILLKPEKNTKXHLMDKXHAQ  
>Mouse, locus26.1  
CNPCEDDWSNAEKSKVCPKHEFLAYEALGFTLVLSIFGALVLAIVVYVHRHTPLVKANDRELSFLIQMSLITVLSLIFIGKPCNMWCMARQITLALGFLCCLSSILGKTLVLMFAKATLPGSDVMWKFQPKQORSIVFL  
STLIQIIICVILVTSPLPKNTKYQSAKILECSGSIACVFGYIGLLACFLMFLARLKLDPNFNEAKITFSMLIFFAWITFIPAYVSTPGKYTVAEIFAIFAILSSFGLLCIFSCKCYIILLKPEKNTKXHLMDKXHAQ  
>Mouse, locus41.1  
CDPCGEDDWSNAEKSKVCPKHEFLAYEALGFTLVLSIFGALVLAIVVYVHRHTPLVKANDRELSFLIQMSLITVLSLIFIGKPCNMWCMARQITLALGFLCCLSSILGKTLVLMFAKATLPGSDVMWKFQPKQORSIVFL  
STLIQIIICVILVTSPLPKNTKYQSAKILECSGSIACVFGYIGLLACFLMFLARLKLDPNFNEAKITFSMLIFFAWITFIPAYVSTPGKYTVAEIFAIFAILSSFGLLCIFSCKCYIILLKPEKNTKXHLMDKXHAQ  
>Mouse, locus35.1  
CDPCGEDDWSNAEKSKVCPKHEFLAYEALGFTLVLSIFGALVLAIVVYVHRHTPLVKANDRELSFLIQMSLITVLSLIFIGKPCNMWCMARQITLALGFLCCLSSILGKTLVLMFAKATLPGSDVMWKFQPKQORSIVFL  
STLIQIIICVILVTSPLPKNTKYQSAKILECSGSIACVFGYIGLLACFLMFLARLKLDPNFNEAKITFSMLIFFAWITFIPAYVSTPGKYTVAEIFAIFAILSSFGLLCIFSCKCYIILLKPEKNTKXHLMDKXHAQ  
>Anole\_lizard, locus40.1

-----MTLIALSIFGVVAVLAVTVGVYIKHRATPLVRANDRDSFLIQMSLITVLSLIFIGKPCNMWCMARQITLALGFLCCLSSILGKTLVLMFAKATLPGSDVMWKFQPKQORSIVFL  
ARMSFKPIFKIIVLSSVTEVIGICTAYLILEPPPMYKNTQFTTLKIFCEDEGSIVYLCVMFGDVLAILCLFTAIVSRKLPNPFNEAKITFSMLIFFAWITFIPAYVSTPGKYTVAEIFAIFAILSSFGLLCIFSCKCYIILLK  
PARNTEEVGGRAAT  
>Western\_c\_lawed\_frog, locus568.1  
CICSPDWSNDRNNECIPKENEYSFODGIGIALTVLTLGACITVAVAVFLHFNTPIVKANSELSFLLLSLILCFLCSIAFIGQPTTWSMVRHTVFGVSFVLCISCILGKTVLVMFAKATLPGSDVMWKFQPKQORSIVFL  
CTLIQIIICVILVTSPLPKNTKYQSAKILECSGSIACVFGYIGLLACFLMFLARLKLDPNFNEAKITFSMLIFFAWITFIPAYVSTPGKYTVAEIFAIFAILSSFGLLCIFSCKCYIILLKPEKNTKXHLMDKXHAQ  
>Zebrafish, locus541.1  
CICQGDYWSNDRNNECIPKENEYSFODGIGIALTVLTLGACITVAVAVFLHFNTPIVKANSELSFLLLSLILCFLCSIAFIGQPTTWSMVRHTVFGVSFVLCISCILGKTVLVMFAKATLPGSDVMWKFQPKQORSIVFL  
CTLIQIIICVILVTSPLPKNTKYQSAKILECSGSIACVFGYIGLLACFLMFLARLKLDPNFNEAKITFSMLIFFAWITFIPAYVSTPGKYTVAEIFAIFAILSSFGLLCIFSCKCYIILLKPEKNTKXHLMDKXHAQ  
>Spotted\_gar, locus169.1  
CICQGDYWSNDRNNECIPKENEYSFODGIGIALTVLTLGACITVAVAVFLHFNTPIVKANSELSFLLLSLILCFLCSIAFIGQPTTWSMVRHTVFGVSFVLCISCILGKTVLVMFAKATLPGSDVMWKFQPKQORSIVFL  
CTLIQIIICVILVTSPLPKNTKYQSAKILECSGSIACVFGYIGLLACFLMFLARLKLDPNFNEAKITFSMLIFFAWITFIPAYVSTPGKYTVAEIFAIFAILSSFGLLCIFSCKCYIILLKPEKNTKXHLMDKXHAQ  
>Reedfish, locus27372.1  
CICQGDYWSNDRNNECIPKENEYSFODGIGIALTVLTLGACITVAVAVFLHFNTPIVKANSELSFLLLSLILCFLCSIAFIGQPTTWSMVRHTVFGVSFVLCISCILGKTVLVMFAKATLPGSDVMWKFQPKQORSIVFL  
CTLIQIIICVILVTSPLPKNTKYQSAKILECSGSIACVFGYIGLLACFLMFLARLKLDPNFNEAKITFSMLIFFAWITFIPAYVSTPGKYTVAEIFAIFAILSSFGLLCIFSCKCYIILLKPEKNTKXHLMDKXHAQ  
>Sterlet, locus180.1  
CICQGDYWSNDRNNECIPKENEYSFODGIGIALTVLTLGACITVAVAVFLHFNTPIVKANSELSFLLLSLILCFLCSIAFIGQPTTWSMVRHTVFGVSFVLCISCILGKTVLVMFAKATLPGSDVMWKFQPKQORSIVFL  
CTLIQIIICVILVTSPLPKNTKYQSAKILECSGSIACVFGYIGLLACFLMFLARLKLDPNFNEAKITFSMLIFFAWITFIPAYVSTPGKYTVAEIFAIFAILSSFGLLCIFSCKCYIILLKPEKNTKXHLMDKXHAQ  
>Coelacanth, locus28.1  
CICQGDYWSNDRNNECIPKENEYSFODGIGIALTVLTLGACITVAVAVFLHFNTPIVKANSELSFLLLSLILCFLCSIAFIGQPTTWSMVRHTVFGVSFVLCISCILGKTVLVMFAKATLPGSDVMWKFQPKQORSIVFL  
CTLIQIIICVILVTSPLPKNTKYQSAKILECSGSIACVFGYIGLLACFLMFLARLKLDPNFNEAKITFSMLIFFAWITFIPAYVSTPGKYTVAEIFAIFAILSSFGLLCIFSCKCYIILLKPEKNTKXHLMDKXHAQ  
>Sterlet, locus136.1  
CFKCPDWSNDRNNECIPKENEYSFODGIGIALTVLTLGACITVAVAVFLHFNTPIVKANSELSFLLLSLILCFLCSIAFIGQPTTWSMVRHTVFGVSFVLCISCILGKTVLVMFAKATLPGSDVMWKFQPKQORSIVFL  
CTLIQIIICVILVTSPLPKNTKYQSAKILECSGSIACVFGYIGLLACFLMFLARLKLDPNFNEAKITFSMLIFFAWITFIPAYVSTPGKYTVAEIFAIFAILSSFGLLCIFSCKCYIILLKPEKNTKXHLMDKXHAQ  
>Sterlet, locus167.1  
CFKCPDWSNDRNNECIPKENEYSFODGIGIALTVLTLGACITVAVAVFLHFNTPIVKANSELSFLLLSLILCFLCSIAFIGQPTTWSMVRHTVFGVSFVLCISCILGKTVLVMFAKATLPGSDVMWKFQPKQORSIVFL  
CTLIQIIICVILVTSPLPKNTKYQSAKILECSGSIACVFGYIGLLACFLMFLARLKLDPNFNEAKITFSMLIFFAWITFIPAYVSTPGKYTVAEIFAIFAILSSFGLLCIFSCKCYIILLKPEKNTKXHLMDKXHAQ  
>Coelacanth, locus225.1  
CAKCPDWSNDRNNECIPKENEYSFODGIGIALTVLTLGACITVAVAVFLHFNTPIVKANSELSFLLLSLILCFLCSIAFIGQPTTWSMVRHTVFGVSFVLCISCILGKTVLVMFAKATLPGSDVMWKFQPKQORSIVFL  
CTLIQIIICVILVTSPLPKNTKYQSAKILECSGSIACVFGYIGLLACFLMFLARLKLDPNFNEAKITFSMLIFFAWITFIPAYVSTPGKYTVAEIFAIFAILSSFGLLCIFSCKCYIILLKPEKNTKXHLMDKXHAQ  
>Reedfish, locus72574.1  
CICKSDYWSNDRNNECIPKENEYSFODGIGIALTVLTLGACITVAVAVFLHFNTPIVKANSELSFLLLSLILCFLCSIAFIGQPTTWSMVRHTVFGVSFVLCISCILGKTVLVMFAKATLPGSDVMWKFQPKQORSIVFL  
CTLIQIIICVILVTSPLPKNTKYQSAKILECSGSIACVFGYIGLLACFLMFLARLKLDPNFNEAKITFSMLIFFAWITFIPAYVSTPGKYTVAEIFAIFAILSSFGLLCIFSCKCYIILLKPEKNTKXHLMDKXHAQ  
>Zebrafish, locus111.1  
CVCNPNWSNDRNNECIPKENEYSFODGIGIALTVLTLGACITVAVAVFLHFNTPIVKANSELSFLLLSLILCFLCSIAFIGQPTTWSMVRHTVFGVSFVLCISCILGKTVLVMFAKATLPGSDVMWKFQPKQORSIVFL  
CTLIQIIICVILVTSPLPKNTKYQSAKILECSGSIACVFGYIGLLACFLMFLARLKLDPNFNEAKITFSMLIFFAWITFIPAYVSTPGKYTVAEIFAIFAILSSFGLLCIFSCKCYIILLKPEKNTKXHLMDKXHAQ  
>Spotted\_gar, locus196.1  
CICNPNWSNDRNNECIPKENEYSFODGIGIALTVLTLGACITVAVAVFLHFNTPIVKANSELSFLLLSLILCFLCSIAFIGQPTTWSMVRHTVFGVSFVLCISCILGKTVLVMFAKATLPGSDVMWKFQPKQORSIVFL  
CTLIQIIICVILVTSPLPKNTKYQSAKILECSGSIACVFGYIGLLACFLMFLARLKLDPNFNEAKITFSMLIFFAWITFIPAYVSTPGKYTVAEIFAIFAILSSFGLLCIFSCKCYIILLKPEKNTKXHLMDKXHAQ

>NM\_013803.3.mouse.CaSR  
CDKCPDDFWSNENHTSCIAKEIEFLWTEPPGIALTLFAVLGIFLTAFLVGVFKFRNTPIVKATNRELSYLLFSLCCFSSSLFFIGEPQDWTCLRQPAFGISFVLCISILVKNRVLVFEAKIPTSLHRKWGNLQFLLVFL  
CTFMQIVICIWLYTAPPSSYRNHELEDEIIFITCHEGSLMALGSLIGYTCLLAAICFFFAFKSRKLPENFNEAKFITFSMLIFFIVWISFIPAYASTYKGFVSAVEVIAILASSFGLLACIFFNKYIILFKPSRNTIEEVRSTAA  
>Mouse.locus398.1  
CDKCPDDFWSNENHTSCIAKEIEFLWTEPPGIALTLFAVLGIFLTAFLVGVFKFRNTPIVKATNRELSYLLFSLCCFSSSLFFIGEPQDWTCLRQPAFGISFVLCISILVKNRVLVFEAKIPTSLHRKWGNLQFLLVFL  
CTFMQIVICIWLYTAPPSSYRNHELEDEIIFITCHEGSLMALGSLIGYTCLLAAICFFFAFKSRKLPENFNEAKFITFSMLIFFIVWISFIPAYASTYKGFVSAVEVIAILASSFGLLACIFFNKYIILFKPSRNT-----  
>Anole\_lizard.locus95.1  
CEKCAENFWSNENHTVCIPKQIEFLWTEPPGIALTLFAVLGIFLTAFLVGVFKFRNTPIVKATNRELSYLLFSLCCFSSSLFFIGEPQDWTCLRQPAFGISFVLCISILVKNRVLVFEAKIPTSLHRKWGNLQFLLVFL  
CTFVQIVICIWLYTAPPSSYRNHELEDEIIFITCHEGSLMALGSLIGYTCLLAAICFFFAFKSRKLPENFNEAKFITFSMLIFFIVWISFIPAYASTYKGFVSAVEVIAILASSFGLLACIFFNKYIILFKPSRNT-----  
>Western\_c\_lawed\_frog.locus333.1  
  
MFAILGICLTSFVLGVFKFRNTPIVKATNRELSYLLFSLCCFSSSLFFIGEPQDWTCLRQPAFGISFVLCISILVKNRVLVFEAKIPTSLHRKWGNLQFLLVFLCTFVQIVICIWLYTAPPSSYRNQDLEDEIIFITCN  
EGSLMALGSLIGYTCLLAAICFFFAFKSRKLPENFNEAKFITFSMLIFFIVWISFIPAYASTYKGFVSAVEVIAILASSFGLLACIFFNKYIILFKPSRNT-----  
>Caecilian.locus19184.1  
CEKCPDWSNENHTACIAKRIEFLWTEPPGIALTLFAVLGIFLTAFLVGVFKFRNTPIVKATNRELSYLLFSLCCFSSSLFFIGEPQDWTCLRQPAFGISFVLCISILVKNRVLVFEAKIPTSLHRKWGNLQFLLVFL  
CTFVQIVICIWLYTAPPSSYRNHELEDEIIFITCHEGSLMALGSLIGYTCLLAAICFFFAFKSRKLPENFNEAKFITFSMLIFFIVWISFIPAYASTYKGFVSAVEVIAILASSFGLLACIFFNKYIILFKPSRNT-----  
>Thorny\_skate.locus20.1  
CTKCPNDFWSNENHTSCIAKEIEYLSWTEPPGIALTLFAVLGILITSFVLGVFKFRNTPIVKATNRELSYLLFSLCCFSSSLFFIGEPQDWTCLRQPAFGISFVLCISILVKNRVLVFEAKIPTSLHRKWGNLQFLLVFL  
CILVQIVTCIWLYTAPPSSYRNHELEDEIIFITCHEGSLMALGSLIGYTCLLAAICFFFAFKSRKLPENFNEAKFITFSMLIFFIVWISFIPAYVST-----  
>Little\_skate.locus75.1  
CTKCPNDFWSNENHTSCIAKEIEYLSWTEPPGIALTLFAVLGILITSFVLGVFKFRNTPIVKATNRELSYLLFSLCCFSSSLFFIGEPQDWTCLRQPAFGISFVLCISILVKNRVLVFEAKIPTSLHRKWGNLQFLLVFL  
CILVQIVTCIWLYTAPPSSYRNHELEDEIIFITCHEGSLMALGSLIGYTCLLAAICFFFAFKSRKLPENFNEAKFITFSMLIFFIVWISFIPAYVSTYKGFVSAVEVIAILASSFGLLGCYFNKYIILFKPSRNT-----  
>Cloudy\_catshark.locus93.1  
CTKCPNDFWSNENHTSCIAKEIEYLSWTEPPGIALTLFAVLGILITSFVLGVFKFRNTPIVKATNRELSYLLFSLCCFSSSLFFIGEPQDWTCLRQPAFGISFVLCISILVKNRVLVFEAKIPTSLHRKWGNLQFLLVFL  
CILVQIVTCIWLYTAPPSSYRNHELEDEIIFITCHEGSLMALGSLIGYTCLLAAICFFFAFKSRKLPENFNEAKFITFSMLIFFIVWISFIPAYVSTYKGFVSAVEVIAILASSFGLLGCYFNKYIILFKPSRNT-----  
>Great\_white\_shark.locus44.1  
CTKCPNDFWSNENHTSCIAKEIEYLSWTEPPGIALTLFAVLGILITSFVLGVFKFRNTPIVKATNRELSYLLFSLCCFSSSLFFIGEPQDWTCLRQPAFGISFVLCISILVKNRVLVFEAKIPTSLHRKWGNLQFLLVFL  
CILVQIVTCIWLYTAPPSSYRNHELEDEIIFITCHEGSLMALGSLIGYTCLLAAICFFFAFKSRKLPENFNEAKFITFSMLIFFIVWISFIPAYVSTYKGFVSAVEVIAILASSFGLLGCYFNKYIILFKPSRNT-----  
>Brownbanded\_bambooshark.locus769.1  
CTKCPNDFWSNENHTSCIAKEIEYLSWTEPPGIALTLFAVLGILITSFVLGVFKFRNTPIVKATNRELSYLLFSLCCFSSSLFFIGEPQDWTCLRQPAFGISFVLCISILVKNRVLVFEAKIPTSLHRKWGNLQFLLVFL  
CILVQIVTCIWLYTAPPSSYRNHELEDEIIFITCHEGSLMALGSLIGYTCLLAAICFFFAFKSRKLPENFNEAKFITFSMLIFFIVWISFIPAYVSTYKGFVSAVEVIAILASSFGLLGCYFNKYIILFKPSRNT-----  
>Whale\_shark.locus27.1  
CTKCPNDFWSNENHTSCIAKEIEYLSWTEPPGIALTLFAVLGILITSFVLGVFKFRNTPIVKATNRELSYLLFSLCCFSSSLFFIGEPQDWTCLRQPAFGISFVLCISILVKNRVLVFEAKIPTSLHRKWGNLQFLLVFL  
CILVQIVTCIWLYTAPPSSYRNHELEDEIIFITCHEGSLMALGSLIGYTCLLAAICFFFAFKSRKLPENFNEAKFITFSMLIFFIVWISFIPAYVSTYKGFVSAVEVIAILASSFGLLGCYFNKYIILFKPSRNT-----  
>Smalltooth\_sawfish.locus11.1  
CTKCPNDFWSNENHTSCIAKEIEYLSWTEPPGIALTLFAVLGILITSFVLGVFKFRNTPIVKATNRELSYLLFSLCCFSSSLFFIGEPQDWTCLRQPAFGISFVLCISILVKNRVLVFEAKIPTSLHRKWGNLQFLLVFL  
CILVQIVTCIWLYTAPPSSYRNHELEDEIIFITCHEGSLMALGSLIGYTCLLAAICFFFAFKSRKLPENFNEAKFITFSMLIFFIVWISFIPAYVSTYKGFVSAVEVIAILASSFGLLGCYFNKYIILFKPSRNT-----  
>Elephant\_shark.locus171.1  
CTKCPNDFWSNENHTSCIAKEIEYLSWTEPPGIALTLFAVLGILITSFVLGVFKFRNTPIVKATNRELSYLLFSLCCFSSSLFFIGEPQDWTCLRQPAFGISFVLCISILVKNRVLVFEAKIPTSLHRKWGNLQFLLVFL  
CTLVQIVTCIWLYTAPPSSYRNHELEDEIIFITCHEGSLMALGSLIGYTCLLAAICFFFAFKSRKLPENFNEAKFITFSMLIFFIVWISFIPAYVSTYKGFVSAVEVIAILASSFGLLGCYFNKYIILFKPSRNT-----  
>Small-eyed\_rabbitfish.locus70.1  
CTKCPNDFWSNENHTSCIAKEIEYLSWTEPPGIALTLFAVLGILITSFVLGVFKFRNTPIVKATNRELSYLLFSLCCFSSSLFFIGEPQDWTCLRQPAFGISFVLCISILVKNRVLVFEAKIPTSLHRKWGNLQFLLVFL  
CTLVQIVTCIWLYTAPPSSYRNHELEDEIIFITCHEGSLMALGSLIGYTCLLAAICFFFAFKSRKLPENFNEAKFITFSMLIFFIVWISFIPAYVSTYKGFVSAVEVIAILASSFGLLGCYFNKYIILFKPSRNT-----

Supplementary File 2. The Newick format phylogenetic tree of all 1897 intact V2Rs identified by a broad range of vertebrates. Note that grouping of “fish-type” V2Rs, “tetrapod-type” V2Rs, V2R2, and ancV2R was supported in sufficient bootstrap values.

```
((Anole_lizard.locus95.1:0.052386,
((((Brownbanded_bambooshark.locus769.1:0.000001,Whale_shark.locus27.1:0.004192)80:0.004238
,(Great_white_shark.locus44.1:0.000001,
(Thorny_skate.locus20.1:0.000001, Little_skate.locus75.1:0.000001)95:0.017053, Cloudy_catshark
.locus93.1:0.004307)44:0.004086)50:0.004225)37:0.004131, Smalltooth_sawfish.locus11.1:0.004224
)74:0.004692, (Small-
eyed_rabbitfish.locus70.1:0.004208, Elephant_shark.locus171.1:0.004207)99:0.016857)79:0.035989
, (((((((Small-
eyed_rabbitfish.locus115.1:0.047697, Elephant_shark.locus31.1:0.049762)100:0.179357,
(((Elephant_shark.locus30.1:0.004517, Elephant_shark.locus29.1:0.010574)100:0.137406,
((Smalltooth_sawfish.locus21.1:0.030479,
(Thorny_skate.locus25.1:0.000001, Little_skate.locus4.1:0.000001)100:0.062483)99:0.036867,
(Brownbanded_bambooshark.locus518.1:0.076931, Cloudy_catshark.locus65.1:0.060638)100:0.049842)
91:0.053196)100:0.117949,
(((((((marker.cichlid_15-2aa:0.076480, marker.medaka_15_1_F:0.072902)68:0.032277, marker.fugu_
15_1_F:0.045736)51:0.031968,
(marker.cichlid_15-1aa:0.128976, marker.cichlid_15-3aa:0.083738)30:0.031439)18:0.012377, marker
.fugu_15_2_F:0.085844)99:0.186587, ((Zebrafish.locus815.1:0.000001,
(marker.zebrafish_9_13_FN:0.000001, Zebrafish.locus539.1:0.000001)65:0.003814)100:0.260461,
(Japanese_eel.locus266.1:0.005042,
(Japanese_eel.locus275.1:0.009109, Japanese_eel.locus263.1:0.005640)57:0.004012)100:0.153818)4
1:0.055653)97:0.206979, Spotted_gar.locus167.1:0.133492)22:0.028935, Reedfish.locus27405.1:0.17
7657)45:0.104226,
((((((((Reedfish.locus27515.1:0.114336, Reedfish.locus27517.1:0.246000)22:0.018018,
((Reedfish.locus27530.1:0.202991, Reedfish.locus40330.1:0.194473)5:0.029290,
((Reedfish.locus27535.1:0.074924, Reedfish.locus27531.1:0.106518)98:0.042185, Reedfish.locus275
43.1:0.063267)94:0.064940)5:0.025521)0:0.031453,
(((Reedfish.locus27451.1:0.183307, Reedfish.locus27510.1:0.141945)2:0.007388, Reedfish.locus27
514.1:0.173467)1:0.007602, Reedfish.locus40375.1:0.228801)0:0.010132,
(((Reedfish.locus27521.1:0.225821, Reedfish.locus27524.1:0.131136)24:0.032530,
(Reedfish.locus40382.1:0.280247, Reedfish.locus27417.1:0.125389)26:0.048778)2:0.006175,
(Reedfish.locus40354.1:0.196076, (Reedfish.locus27496.1:0.020300,
(Reedfish.locus27498.1:0.000001, Reedfish.locus27501.1:0.013628)98:0.008453)100:0.078887)43:0.
055680)0:0.023747)0:0.012142)0:0.012340,
(((Reedfish.locus27464.1:0.033940, Reedfish.locus27461.1:0.006531)100:0.202120,
((Reedfish.locus27527.1:0.176188, Reedfish.locus27452.1:0.243567)4:0.030297,
(((Reedfish.locus27408.1:0.042448, Reedfish.locus27410.1:0.012470)100:0.120721, Reedfish.locus
40334.1:0.191392)32:0.068369, (Reedfish.locus40350.1:0.079094,
((Reedfish.locus40344.1:0.003851, Reedfish.locus40339.1:0.000001)100:0.015230, Reedfish.locus40
349.1:0.016398)97:0.054903)100:0.113184)0:0.008255, Reedfish.locus40363.1:0.137315)0:0.015934)
0:0.010437)0:0.005807,
(((Reedfish.locus27442.1:0.013104, Reedfish.locus27444.1:0.004199)100:0.169639,
(Reedfish.locus27507.1:0.126365, Reedfish.locus27509.1:0.085327)69:0.036535)6:0.011431,
((Reedfish.locus27418.1:0.124802,
(Reedfish.locus27420.1:0.025386, Reedfish.locus27427.1:0.019699)100:0.206187)52:0.059728,
((Reedfish.locus27432.1:0.024325, Reedfish.locus27426.1:0.012179)100:0.140089,
((Reedfish.locus27441.1:0.004275, Reedfish.locus27436.1:0.000001)100:0.203260,
(Reedfish.locus27423.1:0.018888, Reedfish.locus27424.1:0.040315)100:0.088471)30:0.025153)6:0.0
08107)20:0.017626)0:0.018948, Reedfish.locus27411.1:0.089580)1:0.021765)0:0.016528)0:0.012161,
Reedfish.locus27518.1:0.137554)0:0.010566,
(((Reedfish.locus27482.1:0.028897, Reedfish.locus27487.1:0.010858)62:0.010061, Reedfish.locus2
7491.1:0.009726)71:0.026316, Reedfish.locus27495.1:0.015877)100:0.180893,
((Reedfish.locus27472.1:0.044363, Reedfish.locus27467.1:0.015048)61:0.013369,
(Reedfish.locus27468.1:0.027635, Reedfish.locus27474.1:0.075127)51:0.009505)96:0.082193)11:0.0
27233)0:0.005612, (Reedfish.locus27457.1:0.152757,
((Reedfish.locus40381.1:0.044350, Reedfish.locus40378.1:0.037565)100:0.283447, Reedfish.locus27
478.1:0.144630)17:0.014657)11:0.031348)0:0.010090, ((Reedfish.locus40347.1:0.011457,
(Reedfish.locus40342.1:0.019395, Reedfish.locus40336.1:0.003692)88:0.007895)100:0.116640, Reedf
ish.locus27454.1:0.413866)37:0.057518)2:0.018780, (Sterlet.locus293.1:0.142703,
((((((marker.zebrafish_16_10_F:0.000001, Zebrafish.locus527.1:0.000001)100:0.080177,
(((Zebrafish.locus517.1:0.012232, Zebrafish.locus856.1:0.000001)100:0.098150,
(Zebrafish.locus519.1:0.000001, Zebrafish.locus858.1:0.000001)100:0.105898)27:0.019158,
((Zebrafish.locus516.1:0.000001, marker.zebrafish_16_1_F:0.000001)62:0.003655, Zebrafish.locus
855.1:0.000001)100:0.115645,
(Zebrafish.locus528.1:0.000001, marker.zebrafish_16_11_F:0.000001)100:0.120040)22:0.014745)10:
0.007191, ((((((Zebrafish.locus535.1:0.000001, marker.zebrafish_16_16_F:0.000001)100:0.109003,
(Zebrafish.locus814.1:0.000001, Zebrafish.locus538.1:0.000001)100:0.027353)28:0.012134, Zebrafi
sh.locus534.1:0.038175)12:0.006490, Zebrafish.locus533.1:0.030574)17:0.007677,
((((Zebrafish.locus521.1:0.003770,
(marker.zebrafish_16_2_F:0.000001, Zebrafish.locus520.1:0.000001)64:0.003702)100:0.057147, Zebr
afish.locus526.1:0.012555)57:0.006900, Zebrafish.locus525.1:0.011666)96:0.030131, Zebrafish.loc
us532.1:0.040596)55:0.008368)6:0.009468, ((Zebrafish.locus524.1:0.007117,
(marker.zebrafish_16_6_F:0.000001, Zebrafish.locus522.1:0.000001)100:0.015252)100:0.078698,
(Zebrafish.locus536.1:0.000001, marker.zebrafish_16_17_F:0.000001)100:0.062909)12:0.014161)10:
```



0.004776,((Zebrafish.locus530.1:0.000001,marker.zebrafish\_16\_12\_F:0.000001)100:0.086233,  
(marker.zebrafish\_16\_13\_F:0.000001,Zebrafish.locus531.1:0.000001)100:0.106424)28:0.013669)30:  
0.019184)34:0.017014)98:0.117186,(marker.medaka\_16\_1\_F:0.099610,  
(((marker.pufferfish\_16\_3\_Y:0.086664,marker.fugu\_16\_1\_F:0.053713)100:0.099974,marker.fugu\_16\_  
4\_FP:0.044711)58:0.027770,(marker.cichlid\_16-1aa:0.064545,(marker.medaka\_16\_2\_F:0.134779,  
(marker.cichlid\_16-8aa:0.079121,marker.cichlid\_16-10aa:0.065597)50:0.009019,marker.cichlid\_1  
6-4aa:0.087849)98:0.069645)19:0.007944,marker.cichlid\_16-3aa:0.054984)32:0.028619)31:0.025475  
)80:0.075938)99:0.140434)97:0.110928,  
((Japanese\_eel.locus270.1:0.034676,Japanese\_eel.locus260.1:0.007634)41:0.004020,  
(Japanese\_eel.locus262.1:0.013021,  
(Japanese\_eel.locus274.1:0.032980,Japanese\_eel.locus272.1:0.009190)32:0.003782)37:0.005604)10  
0:0.124834)97:0.135866,  
((((Spotted\_gar.locus147.1:0.067985,Spotted\_gar.locus148.1:0.023998)67:0.026539,Spotted\_gar.  
locus152.1:0.051440)17:0.003795,(Spotted\_gar.locus150.1:0.079170,  
(Spotted\_gar.locus163.1:0.018350,  
(Spotted\_gar.locus156.1:0.075456,Spotted\_gar.locus161.1:0.014462)51:0.011656)16:0.003768)4:0.  
003833)24:0.018521,Spotted\_gar.locus154.1:0.049995)15:0.013255,Spotted\_gar.locus166.1:0.07128  
4)35:0.021934)96:0.110640,(((Reedfish.locus40368.1:0.019476,  
(Reedfish.locus40372.1:0.077711,Reedfish.locus40371.1:0.004578)61:0.013761)79:0.036277,Reedfi  
sh.locus40365.1:0.024449)100:0.228177,Reedfish.locus27456.1:0.124522)9:0.028597)3:0.009251)1:  
0.019881)95:0.148811)42:0.046106)6:0.024111,  
((((Brownbanded\_bambooshark.locus1554.1:0.051775,  
(Whale\_shark.locus20.1:0.088747,Whale\_shark.locus22.1:0.179815)83:0.024471)88:0.029757,  
((Great\_white\_shark.locus35.1:0.023508,Great\_white\_shark.locus33.1:0.048051)100:0.037240,  
((Smalltooth\_sawfish.locus39.1:0.011450,Smalltooth\_sawfish.locus24.1:0.024670)61:0.024418,  
(Thorny\_skate.locus32.1:0.006194,Little\_skate.locus16.1:0.002814)100:0.165095)100:0.108712)39  
:0.008494)97:0.080756,Elephant\_shark.locus140.1:0.248932)99:0.113760,  
(((Japanese\_eel.locus82.1:0.142104,  
(marker.zebrafish\_1\_1\_F:0.000001,Zebrafish.locus475.1:0.000001)100:0.000001,Zebrafish.locus8  
30.1:0.004510)99:0.218604)99:0.257398,  
(Reedfish.locus27724.1:0.139501,Sterlet.locus277.1:0.135893)74:0.037360)91:0.127641,Coelacant  
h.locus334.1:0.256726)63:0.051211)30:0.037684,  
(((Sterlet.locus208.1:0.076607,Spotted\_gar.locus28.1:0.257011)100:0.214702,  
(Whale\_shark.locus21.1:0.137545,Great\_white\_shark.locus34.1:0.065673)100:0.201760)9:0.034347,  
((((Cloudy\_catshark.locus54.1:0.218007,Brownbanded\_bambooshark.locus1620.1:0.212586)90:0.11  
6575,  
((Thorny\_skate.locus27.1:0.023305,Little\_skate.locus52.1:0.000001)100:0.113022,Smalltooth\_saw  
fish.locus61.1:0.123257)100:0.179006)100:0.381402,  
(((Thorny\_skate.locus28.1:0.009405,Little\_skate.locus7.1:0.009382)100:0.090574,  
(Whale\_shark.locus2.1:0.011377,Brownbanded\_bambooshark.locus1619.1:0.018674)50:0.009593,  
(Great\_white\_shark.locus17.1:0.044491,Cloudy\_catshark.locus53.1:0.052751)79:0.022354)76:0.034  
482)97:0.129677,(Elephant\_shark.locus192.1:0.032237,Small-  
eyed\_rabbitfish.locus25.1:0.053200)99:0.102315)84:0.077831)92:0.144930,  
(Elephant\_shark.locus22.1:0.214287,  
((((Cloudy\_catshark.locus40.1:0.083684,Great\_white\_shark.locus31.1:0.062917)82:0.037907,  
((Brownbanded\_bambooshark.locus1560.1:0.056302,  
(Whale\_shark.locus24.1:0.042002,Whale\_shark.locus57.1:0.105253)100:0.077731)81:0.021509,Whale\_  
\_shark.locus64.1:0.078490)95:0.035322)100:0.118056,((((Small-  
eyed\_rabbitfish.locus257.1:0.066267,(Small-eyed\_rabbitfish.locus401.1:0.058446,(((Small-  
eyed\_rabbitfish.locus651.1:0.010033,Small-eyed\_rabbitfish.locus376.1:0.018456)40:0.004501,  
(((Small-eyed\_rabbitfish.locus302.1:0.035807,Small-  
eyed\_rabbitfish.locus613.1:0.035687)45:0.005320,((Small-  
eyed\_rabbitfish.locus138.1:0.115791,Small-  
eyed\_rabbitfish.locus291.1:0.046380)51:0.005294,Small-  
eyed\_rabbitfish.locus396.1:0.019353)10:0.001834)1:0.001783,(Small-  
eyed\_rabbitfish.locus60.1:0.082790,(Small-eyed\_rabbitfish.locus209.1:0.070414,(Small-  
eyed\_rabbitfish.locus226.1:0.043818,Small-  
eyed\_rabbitfish.locus366.1:0.047194)42:0.011214)15:0.000001)6:0.003757)0:0.000001,((((Small-  
eyed\_rabbitfish.locus332.1:0.070162,Small-eyed\_rabbitfish.locus355.1:0.044159)30:0.004329,  
(Small-eyed\_rabbitfish.locus500.1:0.030242,Small-  
eyed\_rabbitfish.locus322.1:0.056354)20:0.000001)10:0.003835,Small-  
eyed\_rabbitfish.locus69.1:0.045210)5:0.001428,(Small-eyed\_rabbitfish.locus179.1:0.044580,  
((Small-eyed\_rabbitfish.locus48.1:0.042555,Small-  
eyed\_rabbitfish.locus232.1:0.042795)31:0.003630,Small-  
eyed\_rabbitfish.locus263.1:0.035277)3:0.000001)1:0.000001)0:0.000001)0:0.000001)0:0.003807,  
((Small-eyed\_rabbitfish.locus95.1:0.148777,Small-  
eyed\_rabbitfish.locus128.1:0.049753)32:0.004703,((Small-  
eyed\_rabbitfish.locus539.1:0.123574,Small-  
eyed\_rabbitfish.locus519.1:0.042340)38:0.007550,Small-  
eyed\_rabbitfish.locus330.1:0.034374)8:0.000001)22:0.004004)28:0.000001)90:0.031863  
,Elephant\_shark.locus2.1:0.026833)52:0.007689,  
(Elephant\_shark.locus12.1:0.049000,Elephant\_shark.locus14.1:0.042127)58:0.009155)100:0.108835  
,(Brownbanded\_bambooshark.locus1595.1:0.170547,  
(Cloudy\_catshark.locus44.1:0.016485,Cloudy\_catshark.locus42.1:0.040339)100:0.089046)90:0.0684  
79)39:0.014913,(((Cloudy\_catshark.locus43.1:0.110401,(Whale\_shark.locus61.1:0.066532,  
(Whale\_shark.locus79.1:0.031790,Whale\_shark.locus77.1:0.049628)97:0.035440)97:0.066151)99:0.0  
80720,(Smalltooth\_sawfish.locus36.1:0.147888,  
(Cloudy\_catshark.locus41.1:0.094204,Great\_white\_shark.locus29.1:0.050183)65:0.033580)100:0.14  
3515)37:0.018973,(Whale\_shark.locus62.1:0.067061,

((Whale\_shark.locus58.1:0.027106,Whale\_shark.locus56.1:0.028810)67:0.014103,  
(Brownbanded\_bambooshark.locus1573.1:0.074428,  
(Whale\_shark.locus68.1:0.100904,Brownbanded\_bambooshark.locus1583.1:0.065002)47:0.010011,  
(Brownbanded\_bambooshark.locus1570.1:0.067894,Brownbanded\_bambooshark.locus1562.1:0.045750)3  
1:0.009498,  
(Brownbanded\_bambooshark.locus1585.1:0.044247,Brownbanded\_bambooshark.locus1588.1:0.034221)8  
6:0.014990,Brownbanded\_bambooshark.locus1564.1:0.036728)51:0.009454)31:0.007260)6:0.005590)6:  
0.003712,Brownbanded\_bambooshark.locus1576.1:0.044757)22:0.019546)30:0.010680)100:0.135868,  
(Smalltooth\_sawfish.locus37.1:0.138137,Brownbanded\_bambooshark.locus1597.1:0.153616)71:0.0600  
63)16:0.021167)31:0.019957)100:0.091911)57:0.031090,(((Smalltooth\_sawfish.locus33.1:0.022416,  
(Smalltooth\_sawfish.locus31.1:0.014594,Smalltooth\_sawfish.locus34.1:0.043042)86:0.009655)100:  
0.120206,(Great\_white\_shark.locus25.1:0.088618,  
(Cloudy\_catshark.locus47.1:0.097943,Brownbanded\_bambooshark.locus1599.1:0.149026)70:0.023641)  
93:0.052980)100:0.164842,(Cloudy\_catshark.locus45.1:0.250561,(Small-  
eyed\_rabbitfish.locus83.1:0.071615,Elephant\_shark.locus3.1:0.044414)100:0.161743)74:0.056883)  
42:0.030562)49:0.016698)54:0.027143)27:0.021333,(Elephant\_shark.locus179.1:0.046398,Small-  
eyed\_rabbitfish.locus30.1:0.056441)100:0.246688,  
((((Elephant\_shark.locus177.1:0.155884,Small-  
eyed\_rabbitfish.locus32.1:0.085223)100:0.192559,  
(Brownbanded\_bambooshark.locus1601.1:0.110798,  
(Great\_white\_shark.locus22.1:0.061536,Cloudy\_catshark.locus77.1:0.054829)36:0.015420)100:0.19  
9207)28:0.029872,(Small-  
eyed\_rabbitfish.locus29.1:0.046091,Elephant\_shark.locus180.1:0.036921)100:0.260922)3:0.024748  
,(((Small-eyed\_rabbitfish.locus163.1:0.040797,Elephant\_shark.locus23.1:0.035551)100:0.197163,  
(Smalltooth\_sawfish.locus48.1:0.012496,(Smalltooth\_sawfish.locus53.1:0.014801,  
(Smalltooth\_sawfish.locus59.1:0.003658,Smalltooth\_sawfish.locus57.1:0.007337)20:0.000001,  
(Smalltooth\_sawfish.locus49.1:0.003631,Smalltooth\_sawfish.locus51.1:0.003650)63:0.003658,  
(Smalltooth\_sawfish.locus55.1:0.007358,Smalltooth\_sawfish.locus46.1:0.007350)68:0.003644)65:0  
.003660)45:0.000001)62:0.006148)100:0.125109,  
((((Whale\_shark.locus36.1:0.048480,Whale\_shark.locus103.1:0.057489)61:0.012317,  
(Whale\_shark.locus106.1:0.043412,  
(Whale\_shark.locus109.1:0.047245,Whale\_shark.locus49.1:0.045673)26:0.006175,  
(Brownbanded\_bambooshark.locus1603.1:0.071124,Brownbanded\_bambooshark.locus1611.1:0.074656)29  
:0.014299)9:0.002437)17:0.004293,Brownbanded\_bambooshark.locus1614.1:0.049992)26:0.003481)78:  
0.043315,  
(Great\_white\_shark.locus18.1:0.007473,Great\_white\_shark.locus19.1:0.003877)100:0.045931,Clou  
dy\_catshark.locus91.1:0.046302)62:0.022109)62:0.039322)100:0.132499)8:0.016813,  
(Cloudy\_catshark.locus76.1:0.063841,Great\_white\_shark.locus20.1:0.110422)100:0.125427,  
(Small-  
eyed\_rabbitfish.locus31.1:0.041236,Elephant\_shark.locus178.1:0.057692)100:0.135930)31:0.04608  
7)1:0.005770)5:0.020310,  
((((Elephant\_shark.locus174.1:0.018723,Elephant\_shark.locus176.1:0.000001)44:0.004109,Eleph  
ant\_shark.locus182.1:0.000001)27:0.004116,  
(Elephant\_shark.locus191.1:0.004232,Elephant\_shark.locus212.1:0.000001)31:0.000001,  
(Elephant\_shark.locus202.1:0.000001,Elephant\_shark.locus223.1:0.016711)42:0.004133)3:0.000001  
)12:0.000001,Elephant\_shark.locus203.1:0.004127)100:0.024074,(Small-  
eyed\_rabbitfish.locus629.1:0.024847,Small-  
eyed\_rabbitfish.locus218.1:0.012638)97:0.013204)100:0.188871,  
(Cloudy\_catshark.locus78.1:0.149882,(Smalltooth\_sawfish.locus41.1:0.004194,  
(Smalltooth\_sawfish.locus42.1:0.003782,  
(Smalltooth\_sawfish.locus44.1:0.011830,Smalltooth\_sawfish.locus43.1:0.023242)90:0.007476)88:0  
.007154)100:0.130210)100:0.162198)40:0.055663)11:0.018141)81:0.038479)76:0.034944,  
((((Sterlet.locus286.1:0.139243,(((marker.medaka\_10\_1\_F:0.193754,  
(marker.cichlid\_10-1aa:0.145205,marker.fugu\_10\_1\_F:0.148829)23:0.028449)94:0.119289,  
(marker.zebrafish\_10\_1\_F:0.000001,Zebrafish.locus489.1:0.000001)100:0.261996)93:0.066428,Japa  
nese\_eel.locus400.1:0.199742)67:0.135736,Spotted\_gar.locus135.1:0.122187)33:0.066372)3:0.0448  
29,(Reedfish.locus40391.1:0.294014,Reedfish.locus40393.1:0.260265)47:0.080227,  
(Reedfish.locus27713.1:0.299257,Reedfish.locus40385.1:0.201990)11:0.061873)1:0.032067)0:0.013  
414,(((Spotted\_gar.locus62.1:0.059523,Spotted\_gar.locus69.1:0.117556)62:0.049052,  
((((Spotted\_gar.locus94.1:0.067199,(((Spotted\_gar.locus71.1:0.091352,  
(Spotted\_gar.locus66.1:0.113776,  
(Spotted\_gar.locus89.1:0.030966,Spotted\_gar.locus90.1:0.032131)97:0.057656)31:0.025643)10:0.0  
19528,Spotted\_gar.locus96.1:0.103704)14:0.020516,  
(Spotted\_gar.locus76.1:0.115413,Spotted\_gar.locus74.1:0.043764)27:0.011369)9:0.016713)9:0.015  
297,Spotted\_gar.locus92.1:0.032566)8:0.013718,(Spotted\_gar.locus88.1:0.088000,  
(Spotted\_gar.locus87.1:0.040191,  
(Spotted\_gar.locus81.1:0.038111,Spotted\_gar.locus83.1:0.043726)97:0.038865)66:0.017581,  
(Spotted\_gar.locus78.1:0.021578,Spotted\_gar.locus77.1:0.076471)81:0.050718)38:0.011452)15:0.0  
10842)6:0.010467,Spotted\_gar.locus73.1:0.067614)10:0.027800)10:0.011661,  
((((Spotted\_gar.locus52.1:0.079725,Spotted\_gar.locus48.1:0.091138)39:0.027337,Spotted\_gar.locu  
s100.1:0.085481)11:0.022991,(((Spotted\_gar.locus110.1:0.092491,  
(Spotted\_gar.locus113.1:0.066041,Spotted\_gar.locus105.1:0.098169)43:0.015347)21:0.011414,Spot  
ted\_gar.locus128.1:0.145432)8:0.017452,Spotted\_gar.locus130.1:0.060309)5:0.015038,  
(Spotted\_gar.locus55.1:0.080875,Spotted\_gar.locus120.1:0.128832)22:0.017771,Spotted\_gar.locu  
s70.1:0.088110)20:0.027487)1:0.019234)1:0.010769)7:0.026269,  
((((Zebrafish.locus492.1:0.070956,Zebrafish.locus495.1:0.095871)100:0.082078,  
(marker.fugu\_8\_2\_F:0.104828,  
(marker.cichlid\_8-1aa:0.040644,marker.cichlid\_8-4aa:0.117350)100:0.092648,marker.medaka\_8\_2\_  
FP:0.111914)43:0.028370)95:0.115860)50:0.059290,(Japanese\_eel.locus155.1:0.021042,

(Japanese\_eel.locus298.1:0.026747,Japanese\_eel.locus153.1:0.031012)43:0.007991)90:0.071141)25:0.051408,(((Japanese\_eel.locus219.1:0.012175,(Japanese\_eel.locus108.1:0.014420,(Japanese\_eel.locus106.1:0.007636,(Japanese\_eel.locus99.1:0.018547,Japanese\_eel.locus217.1:0.018589)88:0.012442)43:0.004518)20:0.003757)33:0.010731,(Japanese\_eel.locus227.1:0.022893,(((Japanese\_eel.locus236.1:0.034412,Japanese\_eel.locus234.1:0.038731)34:0.007724,Japanese\_eel.locus247.1:0.050600)20:0.005106,(Japanese\_eel.locus238.1:0.060112,Japanese\_eel.locus250.1:0.030837)15:0.007044)29:0.003850,(Japanese\_eel.locus256.1:0.107612,Japanese\_eel.locus110.1:0.030648)11:0.000001)9:0.004543)27:0.010899)26:0.000001,(Japanese\_eel.locus223.1:0.010327,(((marker.fugu\_4\_3\_FP:0.106445,(marker.cichlid\_4-10aa:0.072090,marker.medaka\_4\_1\_F:0.134451)35:0.007072)98:0.159782,(((Zebrafish.locus509.1:0.000001,marker.zebrafish\_4\_1\_F:0.000001)64:0.003922,Zebrafish.locus848.1:0.000001)100:0.049252,(Zebrafish.locus513.1:0.000001,Zebrafish.locus852.1:0.000001)100:0.039204)50:0.022652,(Zebrafish.locus511.1:0.000001,Zebrafish.locus850.1:0.003876)100:0.036391)100:0.115780)73:0.095150,Japanese\_eel.locus101.1:0.043196)14:0.004708)21:0.012433)69:0.098951,(Japanese\_eel.locus149.1:0.080715,(((marker.pufferfish\_9\_1\_F:0.115259,(marker.medaka\_9\_1\_F:0.173894,marker.cichlid\_9-1aa:0.087377)67:0.026548)85:0.040255,(marker.pufferfish\_6\_1\_F:0.056519,marker.fugu\_6\_2\_F:0.080218)100:0.189751)17:0.053777,(((marker.zebrafish\_9\_2\_F:0.000001,Zebrafish.locus485.1:0.000001)100:0.085659,(marker.zebrafish\_9\_10\_F:0.075640,(((Zebrafish.locus487.1:0.000001,marker.zebrafish\_9\_4\_F:0.000001)100:0.103504,(marker.zebrafish\_9\_9\_F:0.000001,Zebrafish.locus482.1:0.000001)100:0.077018)32:0.012546,(marker.zebrafish\_9\_1\_F:0.071603,(((marker.zebrafish\_9\_7\_F:0.000001,Zebrafish.locus480.1:0.000001)100:0.078708,(marker.zebrafish\_9\_8\_F:0.000001,Zebrafish.locus481.1:0.000001)100:0.074935)36:0.014212,(((Zebrafish.locus488.1:0.000001,marker.zebrafish\_9\_5\_F:0.000001)100:0.078227,(Zebrafish.locus478.1:0.000001,marker.zebrafish\_9\_11\_F:0.000001)100:0.078608)34:0.007507,(marker.zebrafish\_9\_3\_F:0.000001,Zebrafish.locus486.1:0.000001)100:0.108801)27:0.011206)3:0.003815)10:0.004586)19:0.010406)18:0.011664,(Zebrafish.locus479.1:0.000001,marker.zebrafish\_9\_12\_F:0.000001)100:0.114450)22:0.007711)90:0.061413,(((Zebrafish.locus502.1:0.000001,Zebrafish.locus841.1:0.000001)100:0.072396,Zebrafish.locus493.1:0.078689)100:0.134431,((Zebrafish.locus498.1:0.004387,(marker.zebrafish\_5\_1\_F:0.000001,Zebrafish.locus497.1:0.000001)99:0.011344)100:0.111812,Zebrafish.locus494.1:0.195413)12:0.031015)37:0.053469)13:0.014218)6:0.052757,((((((Japanese\_eel.locus202.1:0.013761,Japanese\_eel.locus191.1:0.023324)100:0.050711,Japanese\_eel.locus404.1:0.041047)16:0.000001,(Japanese\_eel.locus189.1:0.018065,Japanese\_eel.locus199.1:0.013566)33:0.004738)13:0.005705,(Japanese\_eel.locus175.1:0.027927,(Japanese\_eel.locus182.1:0.028270,Japanese\_eel.locus186.1:0.040621)86:0.028848)22:0.000001)18:0.007991,(Japanese\_eel.locus184.1:0.045171,Japanese\_eel.locus197.1:0.021793)53:0.009802)53:0.018410,(Japanese\_eel.locus162.1:0.053067,Japanese\_eel.locus158.1:0.059151)18:0.010978)32:0.019850,((Japanese\_eel.locus165.1:0.031200,Japanese\_eel.locus160.1:0.028226)54:0.010043,Japanese\_eel.locus166.1:0.032815)70:0.009595)37:0.021525)2:0.009240)1:0.026570)2:0.033374,(((Japanese\_eel.locus145.1:0.330024,(Zebrafish.locus490.1:0.000001,marker.zebrafish\_7\_1\_F:0.000001)100:0.183728,(marker.medaka\_7\_1\_F:0.217240,marker.cichlid\_7-1aa:0.105399)81:0.023807,(marker.pufferfish\_7\_1\_PF:0.132576,marker.fugu\_7\_1\_F:0.026397)99:0.057411)87:0.065711)51:0.041330)4:0.014829,(Japanese\_eel.locus159.1:0.004355,Japanese\_eel.locus193.1:0.009232)90:0.032087)4:0.024944,Japanese\_eel.locus151.1:0.116819)0:0.020032)0:0.017233)0:0.005854,(marker.fugu\_6\_1\_F:0.334558,Japanese\_eel.locus143.1:0.039272)42:0.074160)17:0.081371)8:0.018270,((((((Reedfish.locus27654.1:0.026274,Reedfish.locus27651.1:0.038255)42:0.010133,Reedfish.locus27649.1:0.025218)48:0.012579,Reedfish.locus40514.1:0.048890)19:0.005282,(((Reedfish.locus27640.1:0.011866,Reedfish.locus27638.1:0.014928)100:0.054501,(Reedfish.locus27646.1:0.000001,Reedfish.locus27641.1:0.000001)99:0.057223)31:0.015418,Reedfish.locus27657.1:0.059792)6:0.000001)10:0.006783,(Reedfish.locus27647.1:0.051876,Reedfish.locus27659.1:0.091874)17:0.011268)86:0.081582,Reedfish.locus27637.1:0.110358)97:0.136366,(Reedfish.locus27603.1:0.238443,(Reedfish.locus27586.1:0.022943,(Reedfish.locus27584.1:0.000001,Reedfish.locus27585.1:0.008898)93:0.048410)100:0.218152)9:0.052844)1:0.035541)0:0.019160,((((((Reedfish.locus27573.1:0.048185,Reedfish.locus27575.1:0.059554)100:0.172956,(Reedfish.locus27661.1:0.183919,(Reedfish.locus27671.1:0.185473,(Reedfish.locus27679.1:0.090699,((Reedfish.locus27689.1:0.000001,Reedfish.locus27685.1:0.030501)100:0.198298,Reedfish.locus27677.1:0.078265)44:0.055202)34:0.022982)13:0.019064)8:0.039426)0:0.012709,((Reedfish.locus40420.1:0.225585,Reedfish.locus40419.1:0.160471)7:0.027297,(Reedfish.locus27570.1:0.128223,(((Reedfish.locus40490.1:0.204426,Reedfish.locus40486.1:0.147179)6:0.023206,(((Reedfish.locus40497.1:0.201640,(Reedfish.locus40506.1:0.013002,(((Reedfish.locus40509.1:0.033294,Reedfish.locus40503.1:0.009785)75:0.023787,Reedfish.locus40499.1:0.000001)11:0.004712,Reedfish.locus40501.1:0.000001)19:0.007715)81:0.054105)58:0.048732,Reedfish.locus40475.1:0.122534)41:0.058090,(Reedfish.locus40513.1:0.088555,Reedfish.locus40492.1:0.051367)64:0.041969)4:0.008949,(Reedfish.locus40471.1:0.041887,Reedfish.locus40478.1:0.034461)100:0.054519,

((Reedfish.locus40481.1:0.020567,Reedfish.locus40483.1:0.031472)77:0.008696,Reedfish.locus40479.1:0.064588)98:0.048191)75:0.032359)14:0.006307)57:0.053980,  
(Reedfish.locus40417.1:0.363922,  
(Reedfish.locus27707.1:0.020659,Reedfish.locus27699.1:0.019775)100:0.153925)6:0.029880)1:0.026866)0:0.014023)0:0.000001)0:0.015278,(Reedfish.locus27576.1:0.124723,  
(Reedfish.locus27567.1:0.140866,  
(Reedfish.locus40427.1:0.083274,Reedfish.locus40424.1:0.101878)100:0.106093)10:0.028299)2:0.026686)0:0.014152,  
(((Reedfish.locus27626.1:0.000001,Reedfish.locus27607.1:0.000001)100:0.239015,  
(((Reedfish.locus27548.1:0.038807,(Reedfish.locus40451.1:0.032393,  
(Reedfish.locus27552.1:0.000001,Reedfish.locus40523.1:0.015521)100:0.080524)44:0.017324,  
(((Reedfish.locus40443.1:0.015127,Reedfish.locus40437.1:0.000001)100:0.036213,  
(Reedfish.locus40464.1:0.020344,(Reedfish.locus40458.1:0.051048,  
(Reedfish.locus40470.1:0.007922,Reedfish.locus40462.1:0.007361)74:0.012346,  
(Reedfish.locus40468.1:0.010700,Reedfish.locus40460.1:0.016939)45:0.013642)22:0.012767)49:0.009319)65:0.015901)47:0.014337,Reedfish.locus40448.1:0.069984)14:0.000001,Reedfish.locus27546.1:0.043332)10:0.009374)16:0.006124)37:0.023270,  
(Reedfish.locus27551.1:0.051649,Reedfish.locus40436.1:0.069918)21:0.006016)100:0.160416,  
(Reedfish.locus40429.1:0.010433,Reedfish.locus40435.1:0.031340)99:0.080018)49:0.031303)16:0.056554,(Reedfish.locus27636.1:0.008455,Reedfish.locus27634.1:0.000001)100:0.208072,  
(Reedfish.locus27693.1:0.285748,((Reedfish.locus27629.1:0.159923,  
(Reedfish.locus27563.1:0.003885,Reedfish.locus40517.1:0.000001)100:0.281721)12:0.037786,  
(Reedfish.locus27632.1:0.188271,  
(Reedfish.locus27683.1:0.082634,Reedfish.locus27690.1:0.063681)100:0.096060)35:0.025757)3:0.019825,Reedfish.locus40433.1:0.173447)0:0.018569)0:0.022169)0:0.012385)0:0.016971,  
(((Sterlet.locus205.1:0.007718,Sterlet.locus206.1:0.000001)100:0.135408,  
(((Sterlet.locus204.1:0.042707,Sterlet.locus203.1:0.000001)98:0.074145,  
(Sterlet.locus290.1:0.108282,  
(((Sterlet.locus280.1:0.048194,Sterlet.locus201.1:0.057537)68:0.009719,Sterlet.locus202.1:0.034010)82:0.039211,((Sterlet.locus197.1:0.014160,((Sterlet.locus196.1:0.007890,  
(Sterlet.locus285.1:0.019777,Sterlet.locus284.1:0.007823)84:0.023765,  
(Sterlet.locus192.1:0.016625,Sterlet.locus193.1:0.027128)27:0.003910,  
(Sterlet.locus199.1:0.015664,Sterlet.locus195.1:0.007830)43:0.004652)24:0.007047)10:0.003966)11:0.003980,Sterlet.locus194.1:0.015875)29:0.005306)91:0.055116,  
(Sterlet.locus283.1:0.028891,Sterlet.locus282.1:0.056618)53:0.027172)5:0.000001,  
(Sterlet.locus200.1:0.011238,Sterlet.locus281.1:0.030776)94:0.069581)21:0.020208)18:0.024367)14:0.006542)32:0.034462,  
(Reedfish.locus27596.1:0.112959,Reedfish.locus27591.1:0.094868)27:0.049451)1:0.004254)0:0.010928,(((Reedfish.locus27559.1:0.171605,  
(Reedfish.locus27554.1:0.004007,Reedfish.locus40520.1:0.007670)100:0.167151)40:0.068263,  
(Reedfish.locus27608.1:0.011358,Reedfish.locus27597.1:0.004469)100:0.186739,  
(Reedfish.locus40453.1:0.016779,Reedfish.locus27613.1:0.006157)100:0.101775,Reedfish.locus27599.1:0.184843)71:0.063589)21:0.031989)0:0.015145,  
(Reedfish.locus27617.1:0.239277,Reedfish.locus27579.1:0.146095)12:0.038283,  
(Reedfish.locus27587.1:0.149135,Reedfish.locus27711.1:0.153981)23:0.039991)1:0.020413)0:0.010213,(Reedfish.locus27697.1:0.026746,Reedfish.locus27703.1:0.019920)100:0.192295,  
(Reedfish.locus40515.1:0.000001,Reedfish.locus27565.1:0.000001)100:0.158812,  
(Reedfish.locus27670.1:0.149182,  
(Reedfish.locus27665.1:0.067539,Reedfish.locus27663.1:0.110602)100:0.071831)38:0.040350)5:0.017955)0:0.004364)0:0.021113)0:0.009524)0:0.007192)0:0.008312)0:0.009892)3:0.035121,  
(Reedfish.locus27623.1:0.212277,  
(Coelacanth.locus327.1:0.125309,Coelacanth.locus330.1:0.160817)46:0.031360,Coelacanth.locus329.1:0.182650)89:0.060503)32:0.055310)38:0.072778)24:0.035539)8:0.022839,  
(((Cloudy\_catshark.locus39.1:0.052361,Great\_white\_shark.locus32.1:0.114160)72:0.017470,  
(Brownbanded\_bambooshark.locus1555.1:0.066224,Whale\_shark.locus23.1:0.036981)92:0.053029)81:0.031008,  
(Thorny\_skate.locus31.1:0.015891,Little\_skate.locus14.1:0.000001)100:0.155296,Smalltooth\_sawfish.locus38.1:0.057605)98:0.093704)99:0.155427,(Coelacanth.locus328.1:0.324076,  
(((Spotted\_gar.locus42.1:0.026199,Spotted\_gar.locus43.1:0.018021)99:0.071164,  
(((marker.zebrafish\_3\_1\_F:0.000001,Zebrafish.locus500.1:0.000001)100:0.180279,  
(marker.cichlid\_3-1aa:0.046916,marker.cichlid\_3-2aa:0.096430)100:0.214159)90:0.091633,  
(Japanese\_eel.locus142.1:0.007394,Japanese\_eel.locus141.1:0.019525)100:0.099099)50:0.046681)92:0.111919,Reedfish.locus27719.1:0.245417)38:0.022368,Sterlet.locus278.1:0.177386)84:0.090661)48:0.067269)53:0.069970)13:0.035891)11:0.029861)1:0.016029)1:0.013583,  
(((Reedfish.locus40409.1:0.126078,((Zebrafish.locus795.1:0.262370,  
(marker.cichlid\_12-1aa:0.202640,marker.fugu\_12\_1\_F:0.129261)100:0.169202)38:0.052770,Japanese\_eel.locus384.1:0.208725)79:0.100762,Spotted\_gar.locus137.1:0.130795)31:0.056434)27:0.021779,  
Sterlet.locus288.1:0.070797)51:0.079128,(Coelacanth.locus333.1:0.164263,  
(Coelacanth.locus21.1:0.010996,Coelacanth.locus20.1:0.000001)79:0.006712,Coelacanth.locus325.1:0.004288)100:0.241065)89:0.087107)33:0.046549,  
(Elephant\_shark.locus206.1:0.241970,Cloudy\_catshark.locus7.1:0.218286)97:0.075671)29:0.056639)1:0.025959,(((Thorny\_skate.locus26.1:0.003695,Little\_skate.locus54.1:0.000001)100:0.181328,  
(((Cloudy\_catshark.locus12.1:0.021324,Cloudy\_catshark\_locus14.1:0.014059)100:0.048714,Cloudy\_catshark.locus8.1:0.099843)34:0.022437,Cloudy\_catshark.locus10.1:0.085599)32:0.039581,  
(Brownbanded\_bambooshark.locus1998.1:0.176615,  
(Brownbanded\_bambooshark.locus2000.1:0.123776,Whale\_shark.locus9.1:0.072712)100:0.064428)23:0.031104)35:0.020657)100:0.118723,(Coelacanth.locus26.1:0.213415,  
(Spotted\_gar.locus140.1:0.121645,  
(((Zebrafish.locus842.1:0.000001,Zebrafish.locus503.1:0.007967)91:0.024966,

(Zebrafish.locus843.1:0.000001,Zebrafish.locus504.1:0.007843)95:0.011551)52:0.010116,  
(Zebrafish.locus840.1:0.000001,Zebrafish.locus501.1:0.000001)100:0.039113)99:0.264294,  
(Japanese\_eel.locus138.1:0.003418,Japanese\_eel.locus140.1:0.013691)100:0.097603)74:0.039943,m  
arker.cichlid\_13-1aa:0.408552)98:0.090796)98:0.094994,  
(Reedfish.locus40406.1:0.057708,Reedfish.locus40408.1:0.094111)100:0.086750)97:0.110894)55:0.  
047107)35:0.040254,((Small-  
eyed\_rabbitfish.locus24.1:0.033217,Elephant\_shark.locus193.1:0.073148)100:0.260495,  
(((Elephant\_shark.locus194.1:0.029149,Small-eyed\_rabbitfish.locus64.1:0.060738)100:0.256699,  
(Cloudy\_catshark.locus15.1:0.065270,Brownbanded\_bambooshark.locus2001.1:0.102959)99:0.063942)  
89:0.078689,(Caecillan.locus34699.1:0.508958,(Coelacanth.locus27.1:0.253056,  
((Spotted\_gar.locus146.1:0.163389,  
(((marker.cichlid\_14-1aa:0.086434,marker.cichlid\_14-3aa:0.079436)98:0.092352,  
(marker.pufferfish\_14\_1\_Y:0.154542,marker.fugu\_14\_1\_F:0.044872)99:0.115914)96:0.262194,  
(Zebrafish.locus514.1:0.000001,marker.zebrafish\_14\_1\_F:0.000001)94:0.000001,Zebrafish.locus8  
53.1:0.017846)100:0.188910)83:0.101945,Japanese\_eel.locus257.1:0.159303)96:0.147088)95:0.1415  
28,Sterlet.locus292.1:0.164993)67:0.061397,Reedfish.locus40383.1:0.204424)78:0.078591)64:0.02  
8316)27:0.020857)75:0.100866,((Reedfish.locus27727.1:0.206924,  
(Sterlet.locus276.1:0.026870,Sterlet.locus209.1:0.004769)100:0.097847,  
(Japanese\_eel.locus396.1:0.012666,(Japanese\_eel.locus394.1:0.026205,  
(Japanese\_eel.locus380.1:0.028083,Japanese\_eel.locus360.1:0.051129)49:0.004214)42:0.008375)99  
:0.157856,((marker.zebrafish\_11\_1\_F:0.000001,Zebrafish.locus473.1:0.000001)100:0.055626,  
(Zebrafish.locus828.1:0.000001,Zebrafish.locus474.1:0.000001)100:0.091477)100:0.169255)98:0.2  
31572)39:0.042255)28:0.019173,Coelacanth.locus335.1:0.291881)48:0.087832,  
(Coelacanth.locus332.1:0.292042,  
((((Zebrafish.locus506.1:0.000001,Zebrafish.locus845.1:0.000001)100:0.018144,  
(Zebrafish.locus844.1:0.000001,  
(Zebrafish.locus505.1:0.000001,marker.zebrafish\_2\_1\_F:0.000001)69:0.004514)100:0.030864)91:0.  
028512,(Zebrafish.locus507.1:0.013604,Zebrafish.locus846.1:0.000001)98:0.042076)100:0.109917,  
(((Japanese\_eel.locus128.1:0.011875,Japanese\_eel.locus113.1:0.021473)68:0.006626,Japanese\_eel  
.locus123.1:0.031717)76:0.013076,Japanese\_eel.locus115.1:0.000001)100:0.076707)90:0.025299,  
(marker.fugu\_2\_1\_F:0.115093,marker.medaka\_2\_1\_F:0.090567)100:0.122834)100:0.083994,Spotted\_ga  
r.locus143.1:0.138627)77:0.072426,  
(((Sterlet.locus289.1:0.004339,Sterlet.locus287.1:0.009938)97:0.019883,  
(Sterlet.locus186.1:0.022619,(((Sterlet.locus183.1:0.003899,(Sterlet.locus188.1:0.000001,  
(Sterlet.locus189.1:0.004467,Sterlet.locus184.1:0.000001)53:0.000001)53:0.003890)33:0.000001,  
(Sterlet.locus187.1:0.016965,Sterlet.locus185.1:0.008975)61:0.003914)37:0.000001,Sterlet.locu  
s182.1:0.000001)33:0.000001,Sterlet.locus191.1:0.004352)38:0.008946)64:0.000001)77:0.021607,  
(Reedfish.locus40403.1:0.053707,Reedfish.locus40415.1:0.097422)96:0.097875)98:0.074050)98:0.1  
02017)87:0.073206)11:0.008524)11:0.033062)2:0.037931)0:0.019106)89:0.191551,((Small-  
eyed\_rabbitfish.locus66.1:0.127989,Elephant\_shark.locus28.1:0.083622)100:0.138684,  
((Great\_white\_shark.locus10.1:0.072089,Cloudy\_catshark.locus87.1:0.097713)62:0.029122,Brownb  
anded\_bambooshark.locus519.1:0.173886)84:0.037786,(Smalltooth\_sawfish.locus20.1:0.080829,  
(Thorny\_skate.locus24.1:0.012462,Little\_skate.locus5.1:0.010614)100:0.100437)100:0.127630)98:  
0.095780)97:0.117727,(Western\_clawed\_frog.locus569.1:0.536656,  
(Spotted\_gar.locus168.1:0.293152,Reedfish.locus27375.1:0.203410)38:0.033944,Sterlet.locus295  
.1:0.101154)65:0.054400)50:0.053683)100:0.308179)48:0.045087,  
(((Western\_clawed\_frog.locus867.1:0.009329,(Western\_clawed\_frog.locus864.1:0.008077,  
(Western\_clawed\_frog.locus866.1:0.008000,Western\_clawed\_frog.locus865.1:0.000001)99:0.028413)  
79:0.019413)100:0.230187,  
((Western\_clawed\_frog.locus847.1:0.035119,Western\_clawed\_frog.locus849.1:0.022434)98:0.04088  
1,  
((Western\_clawed\_frog.locus854.1:0.025842,Western\_clawed\_frog.locus853.1:0.013667)41:0.00816  
2,  
(Western\_clawed\_frog.locus856.1:0.014519,Western\_clawed\_frog.locus855.1:0.005324)92:0.022143)  
31:0.008003,Western\_clawed\_frog.locus852.1:0.050466)19:0.006791)72:0.052399,  
(Western\_clawed\_frog.locus863.1:0.094111,  
(Western\_clawed\_frog.locus858.1:0.050758,Western\_clawed\_frog.locus860.1:0.060772)48:0.024393  
,Western\_clawed\_frog.locus862.1:0.025038)36:0.025927)38:0.026316,Western\_clawed\_frog.locus857  
.1:0.066389)84:0.042361)100:0.223714)100:0.350850,(((Caecillan.locus36974.1:0.011316,  
(Caecillan.locus36976.1:0.000001,Caecillan.locus36981.1:0.000001)100:0.033257)100:0.394562,  
((((Coelacanth.locus349.1:0.096721,Coelacanth.locus377.1:0.122435)100:0.116504,Coelacanth.l  
ocus301.1:0.135892)15:0.013608,  
((((Coelacanth.locus274.1:0.026161,Coelacanth.locus276.1:0.011831)100:0.132409,Coelacanth.  
locus132.1:0.080965)27:0.016904,Coelacanth.locus270.1:0.191182)5:0.005340,  
(Coelacanth.locus375.1:0.125696,  
(Coelacanth.locus136.1:0.177962,Coelacanth.locus209.1:0.124401)45:0.038501)10:0.013555)1:0.01  
1102,(Coelacanth.locus347.1:0.148295,  
(Coelacanth.locus272.1:0.109330,Coelacanth.locus269.1:0.115449)31:0.000347)14:0.023309)1:0.00  
8583,((Coelacanth.locus271.1:0.141145,(Coelacanth.locus268.1:0.119090,  
(Coelacanth.locus319.1:0.115939,  
(Coelacanth.locus362.1:0.076604,Coelacanth.locus361.1:0.039273)56:0.004333,  
(Coelacanth.locus370.1:0.087368,Coelacanth.locus199.1:0.053446)57:0.012874)99:0.081736)64:0.0  
23830)30:0.000001)14:0.022743,(Coelacanth.locus318.1:0.186710,  
(Coelacanth.locus324.1:0.046811,((Coelacanth.locus346.1:0.073243,  
(Coelacanth.locus412.1:0.133184,((Coelacanth.locus321.1:0.079551,  
(Coelacanth.locus290.1:0.076784,Coelacanth.locus320.1:0.055336)20:0.003040)13:0.002655,  
(Coelacanth.locus294.1:0.100711,Coelacanth.locus295.1:0.053767)25:0.016440,  
(Coelacanth.locus389.1:0.045990,Coelacanth.locus292.1:0.104674)36:0.006047)39:0.025611)7:0.00  
4247)13:0.004758)44:0.014768,Coelacanth.locus322.1:0.057003)71:0.018136)96:0.066311)6:0.01356

4)5:0.012846)1:0.017161,(((Coelacanth.locus206.1:0.030550,  
(Coelacanth.locus208.1:0.053105,Coelacanth.locus388.1:0.049704)68:0.007460)99:0.063246,  
(Coelacanth.locus201.1:0.114374,Coelacanth.locus200.1:0.134673)35:0.012508,  
(Coelacanth.locus203.1:0.051425,Coelacanth.locus205.1:0.079051)100:0.058534)89:0.042685)28:0.  
018902,  
(Coelacanth.locus277.1:0.153864,Coelacanth.locus278.1:0.019615)99:0.060230,Coelacanth.locus1  
31.1:0.086372)100:0.134629)10:0.010317)6:0.014942)5:0.021867,  
(Coelacanth.locus341.1:0.132953,Coelacanth.locus353.1:0.083647)93:0.042261,  
(Coelacanth.locus304.1:0.122421,  
(Coelacanth.locus373.1:0.124355,Coelacanth.locus153.1:0.141510)80:0.024302,Coelacanth.loc  
us404.1:0.078812)85:0.032783,((Coelacanth.locus365.1:0.156091,  
(Coelacanth.locus350.1:0.159449,Coelacanth.locus413.1:0.084729)23:0.006910)14:0.023128,  
(Coelacanth.locus142.1:0.106394,  
(Coelacanth.locus248.1:0.024317,Coelacanth.locus143.1:0.062535)93:0.060188)51:0.024689)5:0.00  
3594,  
(Coelacanth.locus311.1:0.114819,Coelacanth.locus150.1:0.106642)48:0.030646)16:0.008301)9:0.00  
5090,Coelacanth.locus252.1:0.138417)32:0.026155,  
(Coelacanth.locus251.1:0.142148,Coelacanth.locus250.1:0.119748)55:0.026363,Coelacanth.locus  
253.1:0.160005)34:0.012824,Coelacanth.locus309.1:0.076138)26:0.013945)45:0.034088)12:0.004954  
,  
(Coelacanth.locus305.1:0.008641,Coelacanth.locus308.1:0.025957)90:0.020156,Coelacanth.locus3  
06.1:0.051779)100:0.091462)16:0.005691,(((Coelacanth.locus374.1:0.021089,  
(Coelacanth.locus351.1:0.047626,Coelacanth.locus262.1:0.052523)51:0.017290,Coelacanth.locus1  
41.1:0.051622)75:0.027592)55:0.006671,  
(Coelacanth.locus145.1:0.051554,Coelacanth.locus147.1:0.077666)84:0.042269)41:0.017963,Coelac  
anth.locus380.1:0.092117)100:0.120959)13:0.018941,(Coelacanth.locus395.1:0.122693,  
(Coelacanth.locus352.1:0.062529,Coelacanth.locus261.1:0.029616)100:0.085883)57:0.046424)9:0.0  
20064)6:0.006703)2:0.012737,Coelacanth.locus302.1:0.156895)14:0.057459,  
(Reedfish.locus56974.1:0.064295,Reedfish.locus56973.1:0.104349)99:0.100656,  
(Sterlet.locus416.1:0.000001,Sterlet.locus438.1:0.003754)100:0.195089,Sterlet.locus410.1:0.1  
05896)78:0.053237)41:0.051098,Reedfish.locus56889.1:0.181413)99:0.219473)8:0.028000)5:0.05071  
9,  
(Caecillan.locus44365.1:0.033212,Caecillan.locus44514.1:0.069118)98:0.202238,Caecillan.loc  
us44364.1:0.175044)90:0.087908,  
(Western\_clawed\_frog.locus426.1:0.121611,Western\_clawed\_frog.locus427.1:0.094154)100:0.178  
462,(Western\_clawed\_frog.locus428.1:0.081575,  
(Western\_clawed\_frog.locus443.1:0.065437,Western\_clawed\_frog.locus442.1:0.006575)92:0.02259  
8,Western\_clawed\_frog.locus444.1:0.077310)20:0.004742,  
(Western\_clawed\_frog.locus438.1:0.015015,  
(Western\_clawed\_frog.locus435.1:0.050433,Western\_clawed\_frog.locus436.1:0.034303)68:0.0239  
18,(Western\_clawed\_frog.locus433.1:0.013917,(Western\_clawed\_frog.locus429.1:0.027766,  
(Western\_clawed\_frog.locus431.1:0.013394,Western\_clawed\_frog.locus432.1:0.016333)79:0.010181)  
63:0.014523)54:0.021321)34:0.020708,Western\_clawed\_frog.locus434.1:0.057993)30:0.019651,Weste  
rn\_clawed\_frog.locus437.1:0.004958)17:0.012105)42:0.027243,Western\_clawed\_frog.locus441.1:0.0  
05902)13:0.005945,Western\_clawed\_frog.locus439.1:0.011718)50:0.029340)43:0.037667)100:0.14543  
0,  
(Western\_clawed\_frog.locus423.1:0.119260,Western\_clawed\_frog.locus424.1:0.141108)98:0.070588  
,  
(Western\_clawed\_frog.locus420.1:0.083608,Western\_clawed\_frog.locus421.1:0.097079)99:0.082505  
,  
(Western\_clawed\_frog.locus422.1:0.186243,Western\_clawed\_frog.locus425.1:0.181611)75:0.037170)  
41:0.021263)100:0.182790)76:0.047676)32:0.016932,  
(Western\_clawed\_frog.locus419.1:0.005467,Western\_clawed\_frog.locus418.1:0.014048)100:0.271724  
)64:0.035120,(Western\_clawed\_frog.locus498.1:0.316338,  
(Western\_clawed\_frog.locus464.1:0.130609,  
(Western\_clawed\_frog.locus497.1:0.152454,Western\_clawed\_frog.locus458.1:0.094122)26:0.017905  
,  
(Western\_clawed\_frog.locus493.1:0.084481,Western\_clawed\_frog.locus449.1:0.073336)6:0.00602  
8,Western\_clawed\_frog.locus448.1:0.152432)1:0.005341,  
(Western\_clawed\_frog.locus467.1:0.070708,Western\_clawed\_frog.locus468.1:0.121712)47:0.036531)  
0:0.004449,(((Western\_clawed\_frog.locus491.1:0.110786,  
(Western\_clawed\_frog.locus485.1:0.047001,Western\_clawed\_frog.locus487.1:0.003999)66:0.00583  
0,Western\_clawed\_frog.locus486.1:0.014015)82:0.026717,Western\_clawed\_frog.locus488.1:0.024327  
)90:0.024455)65:0.033528,Western\_clawed\_frog.locus457.1:0.112984)7:0.023879,  
(Western\_clawed\_frog.locus445.1:0.162316,  
(Western\_clawed\_frog.locus471.1:0.040616,Western\_clawed\_frog.locus489.1:0.110679)9:0.002666)2  
:0.004820)0:0.004241,((Western\_clawed\_frog.locus453.1:0.068759,  
(Western\_clawed\_frog.locus451.1:0.155663,  
(Western\_clawed\_frog.locus472.1:0.024596,Western\_clawed\_frog.locus473.1:0.102841)71:0.028873)  
31:0.011628)13:0.016130,  
(Western\_clawed\_frog.locus470.1:0.024218,Western\_clawed\_frog.locus455.1:0.047431)49:0.008  
340,Western\_clawed\_frog.locus456.1:0.107887)23:0.020295,  
(Western\_clawed\_frog.locus463.1:0.140700,Western\_clawed\_frog.locus469.1:0.061102)34:0.030117)  
4:0.007129,((Western\_clawed\_frog.locus494.1:0.029250,  
(Western\_clawed\_frog.locus454.1:0.054192,(Western\_clawed\_frog.locus481.1:0.048590,  
(Western\_clawed\_frog.locus474.1:0.067112,Western\_clawed\_frog.locus477.1:0.023918)33:0.015904)  
45:0.015191,(Western\_clawed\_frog.locus482.1:0.024417,  
(Western\_clawed\_frog.locus476.1:0.024993,  
(Western\_clawed\_frog.locus479.1:0.024368,Western\_clawed\_frog.locus480.1:0.014461)51:0.004070)

56:0.010513)55:0.017773,Western\_clawed\_frog.locus483.1:0.030353)60:0.017312)25:0.016209)29:0.008294)10:0.000001,Western\_clawed\_frog.locus484.1:0.035323)52:0.028117,  
(Western\_clawed\_frog.locus478.1:0.008061,Western\_clawed\_frog.locus475.1:0.015938)100:0.081133  
)4:0.009423)1:0.012719,Western\_clawed\_frog.locus490.1:0.168923)0:0.000001)0:0.009573)0:0.0110  
11,  
(((Western\_clawed\_frog.locus460.1:0.029336,Western\_clawed\_frog.locus459.1:0.037552)100:0.124  
912,Western\_clawed\_frog.locus492.1:0.131979)23:0.029472,Western\_clawed\_frog.locus446.1:0.1415  
44)1:0.003954,(Western\_clawed\_frog.locus447.1:0.118692,  
(Western\_clawed\_frog.locus496.1:0.069711,  
(Western\_clawed\_frog.locus465.1:0.111710,Western\_clawed\_frog.locus466.1:0.066215)24:0.025630  
,Western\_clawed\_frog.locus452.1:0.073212)70:0.042163)10:0.016790)2:0.006161)0:0.012375)0:0.00  
8934)2:0.019170)11:0.038416)95:0.160670)67:0.045859)97:0.208548)86:0.228237,  
(((Western\_clawed\_frog.locus782.1:0.000001,  
(Western\_clawed\_frog.locus785.1:0.000001,Western\_clawed\_frog.locus783.1:0.008114)97:0.025517)  
100:0.647646,  
((((((((Caecillan.locus44451.1:0.019607,Caecillan.locus44253.1:0.046494)78:0.028310,Caecill  
an.locus44252.1:0.038097)27:0.009745,Caecillan.locus44452.1:0.029379)100:0.103636,  
(((Caecillan.locus44440.1:0.003917,Caecillan.locus44442.1:0.007914)95:0.007932,Caecillan.loc  
us44444.1:0.008023)100:0.130970,((Caecillan.locus44258.1:0.159162,  
(Caecillan.locus44450.1:0.004382,  
(Caecillan.locus44250.1:0.024672,Caecillan.locus44251.1:0.007346)66:0.007538)100:0.095003)52:  
0.013017,Caecillan.locus44261.1:0.124587)69:0.016877)60:0.021552,  
(Caecillan.locus44437.1:0.000001,Caecillan.locus44439.1:0.003767)100:0.123781)72:0.039397)70:  
0.047140,(Caecillan.locus44290.1:0.022552,  
(Caecillan.locus46850.1:0.029735,Caecillan.locus44273.1:0.030173)27:0.009123,  
(Caecillan.locus44297.1:0.040847,Caecillan.locus44300.1:0.010614)80:0.011942)17:0.007142)100:  
0.137390)71:0.055356,((Western\_clawed\_frog.locus381.1:0.007724,  
(((Western\_clawed\_frog.locus385.1:0.019622,Western\_clawed\_frog.locus380.1:0.000001)30:0.0076  
90,Western\_clawed\_frog.locus379.1:0.007674)6:0.000001,Western\_clawed\_frog.locus382.1:0.011623  
)11:0.003841,Western\_clawed\_frog.locus383.1:0.000001)20:0.003846)32:0.003584,  
(Western\_clawed\_frog.locus386.1:0.011642,Western\_clawed\_frog.locus388.1:0.000001)57:0.007783  
,Western\_clawed\_frog.locus389.1:0.015716)21:0.004167)100:0.349954,  
(((Western\_clawed\_frog.locus592.1:0.059354,(Western\_clawed\_frog.locus589.1:0.056848,  
(Western\_clawed\_frog.locus586.1:0.076476,  
(Western\_clawed\_frog.locus731.1:0.000001,Western\_clawed\_frog.locus585.1:0.011309)73:0.053093)  
100:0.172766,  
((((((Western\_clawed\_frog.locus625.1:0.011712,Western\_clawed\_frog.locus699.1:0.000001)100:0.  
070461,  
(Western\_clawed\_frog.locus732.1:0.069525,Western\_clawed\_frog.locus584.1:0.023767)68:0.033994)  
54:0.022620,  
(Western\_clawed\_frog.locus701.1:0.000001,Western\_clawed\_frog.locus623.1:0.000001)100:0.05108  
3,  
(Western\_clawed\_frog.locus624.1:0.014963,Western\_clawed\_frog.locus700.1:0.014129)97:0.045273)  
58:0.026052)87:0.039792,  
(((Western\_clawed\_frog.locus614.1:0.006818,Western\_clawed\_frog.locus710.1:0.035494)90:0.0519  
23,  
(Western\_clawed\_frog.locus621.1:0.034611,Western\_clawed\_frog.locus703.1:0.007600)66:0.005869)  
30:0.003773,  
(((Western\_clawed\_frog.locus628.1:0.034204,Western\_clawed\_frog.locus629.1:0.018556)48:0.00900  
9,(Western\_clawed\_frog.locus626.1:0.051775,  
((Western\_clawed\_frog.locus632.1:0.007527,Western\_clawed\_frog.locus695.1:0.000001)98:0.03067  
0,  
(Western\_clawed\_frog.locus627.1:0.000001,Western\_clawed\_frog.locus698.1:0.000001)100:0.019556  
)28:0.009248,  
(Western\_clawed\_frog.locus696.1:0.000001,Western\_clawed\_frog.locus631.1:0.003852)100:0.01342  
0,  
(Western\_clawed\_frog.locus630.1:0.003907,Western\_clawed\_frog.locus697.1:0.011424)100:0.061593  
)48:0.017523)15:0.006028)46:0.023906)53:0.029469,  
(Western\_clawed\_frog.locus702.1:0.000001,Western\_clawed\_frog.locus622.1:0.000001)100:0.050944  
)97:0.044608)63:0.022884,  
(Western\_clawed\_frog.locus704.1:0.000001,Western\_clawed\_frog.locus620.1:0.003801)100:0.044362  
)69:0.025363)68:0.053356,  
(((Western\_clawed\_frog.locus615.1:0.003721,Western\_clawed\_frog.locus709.1:0.011379)100:0.0629  
88,Western\_clawed\_frog.locus618.1:0.018325)57:0.008144,  
(Western\_clawed\_frog.locus616.1:0.011539,Western\_clawed\_frog.locus708.1:0.000001)100:0.02438  
8,Western\_clawed\_frog.locus706.1:0.002896)31:0.003752)97:0.066409)37:0.018932,  
(((Western\_clawed\_frog.locus580.1:0.009521,Western\_clawed\_frog.locus737.1:0.015320)72:0.0193  
47,  
(((Western\_clawed\_frog.locus735.1:0.003845,Western\_clawed\_frog.locus581.1:0.003834)100:0.023  
493,Western\_clawed\_frog.locus583.1:0.009031)90:0.011939,  
(Western\_clawed\_frog.locus741.1:0.000001,Western\_clawed\_frog.locus578.1:0.004426)98:0.019277)  
54:0.007796,(Western\_clawed\_frog.locus736.1:0.018549,  
(Western\_clawed\_frog.locus619.1:0.000001,Western\_clawed\_frog.locus705.1:0.000001)100:0.019791  
)77:0.003779)57:0.011367)37:0.004393,  
(Western\_clawed\_frog.locus734.1:0.000001,Western\_clawed\_frog.locus582.1:0.000001)100:0.011658  
)24:0.005269,Western\_clawed\_frog.locus739.1:0.010154)99:0.084176)23:0.009565,  
(Western\_clawed\_frog.locus715.1:0.011108,Western\_clawed\_frog.locus609.1:0.003839)80:0.017681  
,  
((Western\_clawed\_frog.locus717.1:0.000001,Western\_clawed\_frog.locus607.1:0.000001)100:0.0326

27,  
(((Western\_clawed\_frog.locus729.1:0.003478,Western\_clawed\_frog.locus590.1:0.020862)100:0.0348  
27,(Western\_clawed\_frog.locus594.1:0.044658,  
(Western\_clawed\_frog.locus727.1:0.000001,Western\_clawed\_frog.locus597.1:0.000001)100:0.03448  
1,  
(Western\_clawed\_frog.locus598.1:0.000001,Western\_clawed\_frog.locus726.1:0.007381)100:0.024847  
)85:0.031276)78:0.039827)29:0.018794,(((Western\_clawed\_frog.locus596.1:0.034928,  
(Western\_clawed\_frog.locus603.1:0.030852,Western\_clawed\_frog.locus721.1:0.025637)51:0.010810)  
42:0.004310,(Western\_clawed\_frog.locus728.1:0.018498,  
(Western\_clawed\_frog.locus722.1:0.028894,Western\_clawed\_frog.locus602.1:0.010723)96:0.045379)  
53:0.017127)66:0.009866,Western\_clawed\_frog.locus605.1:0.035289)72:0.018382)12:0.011157)40:0.  
021339,  
((((((Western\_clawed\_frog.locus682.1:0.035925,Western\_clawed\_frog.locus644.1:0.035389)91:0.0  
40477,((((((Western\_clawed\_frog.locus646.1:0.015337,  
(Western\_clawed\_frog.locus680.1:0.000001,Western\_clawed\_frog.locus678.1:0.000001)100:0.015546  
)79:0.011666,  
(Western\_clawed\_frog.locus679.1:0.000001,Western\_clawed\_frog.locus681.1:0.015464)99:0.027960  
,(Western\_clawed\_frog.locus647.1:0.026279,(Western\_clawed\_frog.locus677.1:0.054661,  
(Western\_clawed\_frog.locus676.1:0.020377,Western\_clawed\_frog.locus675.1:0.034391)44:0.010014)  
10:0.010846)42:0.019510)25:0.007958)26:0.006267,(Western\_clawed\_frog.locus686.1:0.021619,  
(Western\_clawed\_frog.locus641.1:0.014285,Western\_clawed\_frog.locus685.1:0.013489)100:0.040231  
)51:0.011988,  
(((Western\_clawed\_frog.locus655.1:0.031204,Western\_clawed\_frog.locus651.1:0.031010)5:0.00381  
9,(((Western\_clawed\_frog.locus659.1:0.034602,  
((((((Western\_clawed\_frog.locus748.1:0.042769,Western\_clawed\_frog.locus751.1:0.030788)39:0.0  
09773,(Western\_clawed\_frog.locus743.1:0.034956,((((((Western\_clawed\_frog.locus634.1:0.146486,  
(Western\_clawed\_frog.locus613.1:0.000001,Western\_clawed\_frog.locus711.1:0.003748)100:0.038953  
)39:0.011676,Western\_clawed\_frog.locus714.1:0.069497)18:0.019924,  
(Western\_clawed\_frog.locus612.1:0.003762,Western\_clawed\_frog.locus712.1:0.007532)99:0.007349)  
100:0.205971,  
(Western\_clawed\_frog.locus713.1:0.030847,Western\_clawed\_frog.locus611.1:0.011137)83:0.004162)  
19:0.065525,Western\_clawed\_frog.locus749.1:0.003729)6:0.000001,  
(Western\_clawed\_frog.locus658.1:0.026818,(Western\_clawed\_frog.locus661.1:0.042552,  
(Western\_clawed\_frog.locus750.1:0.016635,Western\_clawed\_frog.locus660.1:0.012908)93:0.017091)  
35:0.004091)33:0.015152)1:0.003946)1:0.002860)3:0.010825,Western\_clawed\_frog.locus745.1:0.034  
367)4:0.006447,Western\_clawed\_frog.locus747.1:0.054908)10:0.003039,Western\_clawed\_frog.locus7  
52.1:0.011269)4:0.007658,Western\_clawed\_frog.locus744.1:0.034697)8:0.004441,  
(Western\_clawed\_frog.locus753.1:0.015088,Western\_clawed\_frog.locus742.1:0.026414)89:0.028031)  
2:0.004093)14:0.034755,(Western\_clawed\_frog.locus654.1:0.023007,  
(Western\_clawed\_frog.locus668.1:0.034733,Western\_clawed\_frog.locus649.1:0.018175)18:0.005410)  
7:0.000001,(Western\_clawed\_frog.locus664.1:0.018904,  
(Western\_clawed\_frog.locus665.1:0.000001,Western\_clawed\_frog.locus666.1:0.003746)96:0.015218)  
72:0.011450,  
(Western\_clawed\_frog.locus667.1:0.030454,Western\_clawed\_frog.locus653.1:0.007595)28:0.000001)  
78:0.015250)19:0.003790)0:0.003960,Western\_clawed\_frog.locus640.1:0.015418)0:0.000001)0:0.011  
429,Western\_clawed\_frog.locus687.1:0.023235)0:0.000001,  
(((Western\_clawed\_frog.locus674.1:0.036121,  
(Western\_clawed\_frog.locus669.1:0.049014,Western\_clawed\_frog.locus663.1:0.032370)12:0.007758  
,Western\_clawed\_frog.locus672.1:0.024379)12:0.008251)6:0.005831,  
(Western\_clawed\_frog.locus746.1:0.027076,Western\_clawed\_frog.locus662.1:0.042980)49:0.021189)  
0:0.007510,Western\_clawed\_frog.locus671.1:0.031346)1:0.007873,  
(Western\_clawed\_frog.locus688.1:0.037772,Western\_clawed\_frog.locus639.1:0.017777)63:0.018258)  
0:0.003966)0:0.011318)0:0.009488)2:0.008160,  
((Western\_clawed\_frog.locus650.1:0.043692,Western\_clawed\_frog.locus670.1:0.044702)12:0.00502  
9,Western\_clawed\_frog.locus738.1:0.043049)5:0.005456,  
(Western\_clawed\_frog.locus656.1:0.007451,Western\_clawed\_frog.locus657.1:0.018901)95:0.051461  
,  
(Western\_clawed\_frog.locus648.1:0.026835,Western\_clawed\_frog.locus673.1:0.007676)92:0.043528  
,Western\_clawed\_frog.locus645.1:0.074855)11:0.000001)7:0.007071)7:0.016280)13:0.032855,  
(Western\_clawed\_frog.locus637.1:0.003504,Western\_clawed\_frog.locus690.1:0.016172)100:0.04408  
8,  
(((Western\_clawed\_frog.locus689.1:0.027870,Western\_clawed\_frog.locus638.1:0.022421)95:0.04236  
1,  
(Western\_clawed\_frog.locus683.1:0.019930,Western\_clawed\_frog.locus643.1:0.012066)99:0.038881  
,  
(Western\_clawed\_frog.locus642.1:0.011268,Western\_clawed\_frog.locus684.1:0.003666)94:0.049748)  
80:0.032936)64:0.011755,  
(Western\_clawed\_frog.locus691.1:0.003882,Western\_clawed\_frog.locus636.1:0.007678)100:0.079213  
)23:0.014008)12:0.010610)3:0.008206,  
(Western\_clawed\_frog.locus635.1:0.000001,Western\_clawed\_frog.locus692.1:0.007417)100:0.061783  
)2:0.007661)35:0.091415,  
((((((Western\_clawed\_frog.locus768.1:0.007714,Western\_clawed\_frog.locus773.1:0.007609)54:0.007  
622,((((((Western\_clawed\_frog.locus774.1:0.000001,  
(Western\_clawed\_frog.locus780.1:0.011400,Western\_clawed\_frog.locus779.1:0.000001)79:0.011371  
,Western\_clawed\_frog.locus778.1:0.003778)44:0.003829)9:0.000001,Western\_clawed\_frog.locus771.  
1:0.007620)7:0.003813,Western\_clawed\_frog.locus767.1:0.011491)1:0.000001,Western\_clawed\_frog.  
locus776.1:0.003806)1:0.000001,((Western\_clawed\_frog.locus757.1:0.023258,  
(Western\_clawed\_frog.locus766.1:0.015435,Western\_clawed\_frog.locus765.1:0.011395)28:0.004027  
,



((Western\_clawed\_frog.locus760.1:0.000001,Western\_clawed\_frog.locus761.1:0.000001)86:0.00766  
9,Western\_clawed\_frog.locus759.1:0.007704)29:0.003830,Western\_clawed\_frog.locus762.1:0.003837  
)36:0.003831)13:0.003883)16:0.007607,  
(Western\_clawed\_frog.locus755.1:0.003801,Western\_clawed\_frog.locus770.1:0.011571)25:0.003826)  
5:0.000001,((Western\_clawed\_frog.locus754.1:0.003811,  
(Western\_clawed\_frog.locus769.1:0.011486,Western\_clawed\_frog.locus763.1:0.023094)6:0.003810)2  
:0.003814,Western\_clawed\_frog.locus772.1:0.003807)0:0.000001)6:0.007634)11:0.003891)47:0.0038  
39,Western\_clawed\_frog.locus764.1:0.015224)76:0.024912,Western\_clawed\_frog.locus758.1:0.01423  
1)96:0.086712,Western\_clawed\_frog.locus756.1:0.011461)83:0.064923)18:0.051435,  
(Western\_clawed\_frog.locus591.1:0.016875,Western\_clawed\_frog.locus587.1:0.039637)84:0.025628)  
5:0.011465,  
(Western\_clawed\_frog.locus720.1:0.004327,Western\_clawed\_frog.locus604.1:0.026259)65:0.011631  
,  
(Western\_clawed\_frog.locus718.1:0.011418,Western\_clawed\_frog.locus606.1:0.019146)100:0.03424  
4,Western\_clawed\_frog.locus600.1:0.023307)34:0.000001)47:0.016272)7:0.017712,  
(Western\_clawed\_frog.locus608.1:0.000001,Western\_clawed\_frog.locus716.1:0.003816)100:0.068844  
)5:0.029048,  
(Western\_clawed\_frog.locus723.1:0.003638,Western\_clawed\_frog.locus601.1:0.003651)96:0.010334  
,((Western\_clawed\_frog.locus593.1:0.023588,  
(Western\_clawed\_frog.locus730.1:0.064223,Western\_clawed\_frog.locus588.1:0.000001)100:0.032817  
)89:0.050818,  
(Western\_clawed\_frog.locus725.1:0.004196,Western\_clawed\_frog.locus599.1:0.004020)95:0.025910)  
30:0.023005)26:0.015667)1:0.007285)1:0.021890)3:0.044815)9:0.037490)4:0.029634)13:0.062687)99  
:0.461405,  
(Western\_clawed\_frog.locus786.1:0.517271,Western\_clawed\_frog.locus781.1:0.366714)34:0.053430)  
21:0.018068,(((Western\_clawed\_frog.locus506.1:0.031998,  
(Western\_clawed\_frog.locus507.1:0.024661,Western\_clawed\_frog.locus508.1:0.046522)95:0.027995)  
91:0.018308,Western\_clawed\_frog.locus505.1:0.000001)100:0.578265,  
((((Western\_clawed\_frog.locus947.1:0.006275,  
(Western\_clawed\_frog.locus945.1:0.039145,Western\_clawed\_frog.locus946.1:0.028455)39:0.017015)  
39:0.019903,Western\_clawed\_frog.locus944.1:0.030708)38:0.013649,Western\_clawed\_frog.locus943.  
1:0.053073)100:0.373350,  
(Western\_clawed\_frog.locus941.1:0.088334,Western\_clawed\_frog.locus940.1:0.075903)100:0.364803  
)74:0.071642,((Western\_clawed\_frog.locus980.1:0.114063,  
(Western\_clawed\_frog.locus905.1:0.060195,Western\_clawed\_frog.locus993.1:0.025959)98:0.097974)  
35:0.015077,  
(((Western\_clawed\_frog.locus991.1:0.023508,Western\_clawed\_frog.locus988.1:0.031258)95:0.0415  
14,(Western\_clawed\_frog.locus992.1:0.016088,  
(Western\_clawed\_frog.locus906.1:0.037985,Western\_clawed\_frog.locus990.1:0.018009)84:0.007562)  
97:0.027131)36:0.017291,(Western\_clawed\_frog.locus982.1:0.075998,  
(Western\_clawed\_frog.locus987.1:0.026260,  
(Western\_clawed\_frog.locus985.1:0.010066,Western\_clawed\_frog.locus984.1:0.063329)79:0.023658)  
32:0.003879,  
(Western\_clawed\_frog.locus989.1:0.050559,Western\_clawed\_frog.locus986.1:0.015296)51:0.007926)  
81:0.031043,Western\_clawed\_frog.locus983.1:0.060907)76:0.027932)27:0.007352)78:0.056673,Weste  
rn\_clawed\_frog.locus981.1:0.082875)68:0.033679)100:0.382509)60:0.035232,  
(Western\_clawed\_frog.locus995.1:0.029690,  
(Western\_clawed\_frog.locus994.1:0.056005,Western\_clawed\_frog.locus999.1:0.027745)65:0.027677  
,Western\_clawed\_frog.locus998.1:0.086583)67:0.024193)100:0.286870)94:0.148386)19:0.044894)12:  
0.062779,(((Western\_clawed\_frog.locus919.1:0.027907,  
(Western\_clawed\_frog.locus917.1:0.003527,Western\_clawed\_frog.locus918.1:0.031458)84:0.018089  
,Western\_clawed\_frog.locus920.1:0.021632)62:0.010668)87:0.078978,  
(Western\_clawed\_frog.locus924.1:0.024256,  
(Western\_clawed\_frog.locus922.1:0.019738,Western\_clawed\_frog.locus923.1:0.019709)58:0.022545)  
81:0.060538)59:0.037625,  
(Western\_clawed\_frog.locus915.1:0.023346,Western\_clawed\_frog.locus916.1:0.019802)90:0.056952)  
99:0.560627,((Western\_clawed\_frog.locus913.1:0.099558,  
(Western\_clawed\_frog.locus914.1:0.079123,(Western\_clawed\_frog.locus909.1:0.016682,  
(Western\_clawed\_frog.locus912.1:0.035823,Western\_clawed\_frog.locus911.1:0.014601)59:0.02324  
4,Western\_clawed\_frog.locus910.1:0.027374)35:0.014469,Western\_clawed\_frog.locus903.1:0.025683  
)9:0.004578)37:0.022281)22:0.016256)100:0.376238,((Western\_clawed\_frog.locus939.1:0.011068,  
(Western\_clawed\_frog.locus937.1:0.072351,Western\_clawed\_frog.locus936.1:0.044632)40:0.008802  
,Western\_clawed\_frog.locus938.1:0.022520)44:0.009112)100:0.262037,  
(Western\_clawed\_frog.locus935.1:0.104156,  
(Western\_clawed\_frog.locus932.1:0.054359,Western\_clawed\_frog.locus931.1:0.012251)66:0.019539  
,  
(Western\_clawed\_frog.locus930.1:0.020629,Western\_clawed\_frog.locus926.1:0.032984)50:0.011765  
,  
(Western\_clawed\_frog.locus933.1:0.070538,Western\_clawed\_frog.locus928.1:0.007751)18:0.00446  
2,Western\_clawed\_frog.locus927.1:0.016099)22:0.012301,Western\_clawed\_frog.locus929.1:0.020670  
)50:0.032608)26:0.005826)33:0.018032)34:0.010214,Western\_clawed\_frog.locus934.1:0.053848)100:  
0.228715)84:0.100827)72:0.052648)26:0.049090,(Caecillan.locus22632.1:0.165003,  
(Western\_clawed\_frog.locus848.1:0.147064,Western\_clawed\_frog.locus850.1:0.113894)100:0.295616  
)18:0.006892)4:0.032417)5:0.021508)5:0.019743)3:0.027122,  
((((Caecillan.locus36896.1:0.007917,Caecillan.locus36888.1:0.012105)75:0.017842,Caecillan.loc  
us36882.1:0.010247)33:0.003971,(((Caecillan.locus36898.1:0.011591,  
(Caecillan.locus36885.1:0.000001,Caecillan.locus36895.1:0.000001)99:0.016100)29:0.003842,  
(Caecillan.locus36883.1:0.000001,Caecillan.locus36884.1:0.000001)88:0.004190)39:0.004266,  
(Caecillan.locus36891.1:0.003988,Caecillan.locus36886.1:0.003959)90:0.015448,

(Caecillan.locus36893.1:0.000001,Caecillan.locus36892.1:0.000001)98:0.008542)31:0.003942)14:0.004970)43:0.009367,Caecillan.locus36900.1:0.008841)100:0.233937)25:0.042745,  
(Western\_clawed\_frog.locus377.1:0.009895,(Western\_clawed\_frog.locus376.1:0.000001,  
(Western\_clawed\_frog.locus375.1:0.000001,  
(Western\_clawed\_frog.locus378.1:0.049900,Western\_clawed\_frog.locus374.1:0.003779)55:0.003897)  
50:0.003828)59:0.005678)100:0.565476)72:0.058594,(Western\_clawed\_frog.locus192.1:0.454316,  
((((Western\_clawed\_frog.locus167.1:0.052476,  
(((((((Western\_clawed\_frog.locus163.1:0.025151,Western\_clawed\_frog.locus162.1:0.036345)85:0.  
.035324,  
(((Western\_clawed\_frog.locus32.1:0.023173,Western\_clawed\_frog.locus31.1:0.027854)68:0.014517  
,((Western\_clawed\_frog.locus115.1:0.015174,(Western\_clawed\_frog.locus117.1:0.000001,  
(Western\_clawed\_frog.locus118.1:0.061886,Western\_clawed\_frog.locus116.1:0.019069)13:0.011207)  
6:0.007502)50:0.034602,  
(Western\_clawed\_frog.locus25.1:0.025156,Western\_clawed\_frog.locus24.1:0.025108)97:0.024182,  
((Western\_clawed\_frog.locus28.1:0.037170,Western\_clawed\_frog.locus29.1:0.004089)44:0.011508,  
Western\_clawed\_frog.locus30.1:0.008398)71:0.021116,  
((Western\_clawed\_frog.locus282.1:0.059617,Western\_clawed\_frog.locus22.1:0.007956)41:0.008049  
,Western\_clawed\_frog.locus23.1:0.008374)32:0.018167,Western\_clawed\_frog.locus21.1:0.035282)18  
:0.016733)26:0.006666)41:0.017626)5:0.013689)4:0.004729,  
((Western\_clawed\_frog.locus27.1:0.023441,Western\_clawed\_frog.locus26.1:0.029792)94:0.031180,  
(Western\_clawed\_frog.locus59.1:0.033197,  
(Western\_clawed\_frog.locus62.1:0.035446,Western\_clawed\_frog.locus58.1:0.026665)42:0.010159)41  
:0.032787)14:0.014320,Western\_clawed\_frog.locus34.1:0.083871)7:0.019465)0:0.011193,Western\_cl  
awed\_frog.locus35.1:0.099999)0:0.030449)0:0.005566,  
((((Western\_clawed\_frog.locus46.1:0.007684,  
(Western\_clawed\_frog.locus40.1:0.011561,Western\_clawed\_frog.locus45.1:0.007714)69:0.007640)13  
:0.000001,Western\_clawed\_frog.locus51.1:0.011494)9:0.003823,  
((((Western\_clawed\_frog.locus41.1:0.011579,Western\_clawed\_frog.locus42.1:0.003873)43:0.0035  
95,Western\_clawed\_frog.locus44.1:0.019401)43:0.003974,Western\_clawed\_frog.locus52.1:0.000001)  
36:0.003812,Western\_clawed\_frog.locus47.1:0.007701)51:0.007695,Western\_clawed\_frog.locus39.1:  
0.023259)16:0.003808,Western\_clawed\_frog.locus43.1:0.000001)9:0.000001)25:0.020126,Western\_cl  
awed\_frog.locus48.1:0.026826)46:0.025043,Western\_clawed\_frog.locus203.1:0.036807)47:0.028741,  
(Western\_clawed\_frog.locus272.1:0.011549,  
(Western\_clawed\_frog.locus275.1:0.000001,Western\_clawed\_frog.locus277.1:0.011293)88:0.007524  
,  
(Western\_clawed\_frog.locus274.1:0.067432,Western\_clawed\_frog.locus271.1:0.000001)85:0.026780  
,Western\_clawed\_frog.locus278.1:0.014166)48:0.008681)9:0.003683)7:0.003779,  
(Western\_clawed\_frog.locus269.1:0.015073,Western\_clawed\_frog.locus270.1:0.005553)51:0.001918)  
68:0.035257)44:0.030457,  
(((Western\_clawed\_frog.locus234.1:0.007300,Western\_clawed\_frog.locus237.1:0.007326)74:0.0036  
68,  
(Western\_clawed\_frog.locus232.1:0.000001,Western\_clawed\_frog.locus230.1:0.022184)49:0.003671  
,  
(Western\_clawed\_frog.locus233.1:0.010921,Western\_clawed\_frog.locus231.1:0.007285)16:0.003618)  
23:0.003599)99:0.040120,  
(((Western\_clawed\_frog.locus159.1:0.010654,Western\_clawed\_frog.locus136.1:0.018814)65:0.0122  
46,  
(Western\_clawed\_frog.locus114.1:0.019322,Western\_clawed\_frog.locus160.1:0.051777)52:0.013874)  
27:0.014084,(Western\_clawed\_frog.locus104.1:0.041128,  
(Western\_clawed\_frog.locus112.1:0.000001,  
(Western\_clawed\_frog.locus113.1:0.010827,Western\_clawed\_frog.locus111.1:0.003572)46:0.007165)  
71:0.006029)88:0.019832)40:0.016364,Western\_clawed\_frog.locus190.1:0.021361)67:0.024203)18:0.  
010746,Western\_clawed\_frog.locus121.1:0.060575)2:0.010896)0:0.007367)0:0.003747,  
(Western\_clawed\_frog.locus188.1:0.069464,  
((Western\_clawed\_frog.locus157.1:0.011327,Western\_clawed\_frog.locus127.1:0.040669)97:0.04809  
6,(Western\_clawed\_frog.locus5.1:0.098075,  
(Western\_clawed\_frog.locus82.1:0.007239,Western\_clawed\_frog.locus83.1:0.003913)81:0.018858,  
(Western\_clawed\_frog.locus84.1:0.000001,Western\_clawed\_frog.locus85.1:0.015263)85:0.016666)98  
:0.049800)3:0.008549,  
(Western\_clawed\_frog.locus229.1:0.030947,Western\_clawed\_frog.locus228.1:0.071558)45:0.007636  
,  
(Western\_clawed\_frog.locus135.1:0.029031,Western\_clawed\_frog.locus161.1:0.026302)92:0.025847)  
51:0.020363)0:0.004648)1:0.011150,((((Western\_clawed\_frog.locus74.1:0.003720,  
(Western\_clawed\_frog.locus72.1:0.000001,Western\_clawed\_frog.locus73.1:0.003764)82:0.003785)10  
0:0.022073,  
(Western\_clawed\_frog.locus54.1:0.007307,Western\_clawed\_frog.locus56.1:0.003611)98:0.030674)83  
:0.046596,  
(Western\_clawed\_frog.locus195.1:0.039620,Western\_clawed\_frog.locus194.1:0.025187)54:0.015977  
,  
(((Western\_clawed\_frog.locus187.1:0.013473,Western\_clawed\_frog.locus185.1:0.004448)63:0.00908  
0,  
(Western\_clawed\_frog.locus123.1:0.010586,Western\_clawed\_frog.locus124.1:0.000001)34:0.005149)  
51:0.000001,Western\_clawed\_frog.locus128.1:0.041693)43:0.016627)41:0.042258)1:0.008875,  
((Western\_clawed\_frog.locus69.1:0.074700,Western\_clawed\_frog.locus86.1:0.060655)13:0.012093,  
Western\_clawed\_frog.locus225.1:0.081351)0:0.000001,  
(Western\_clawed\_frog.locus109.1:0.031332,Western\_clawed\_frog.locus238.1:0.020949)100:0.05274  
4,Western\_clawed\_frog.locus110.1:0.034933)26:0.021396)1:0.003781)0:0.000001,  
((((Western\_clawed\_frog.locus57.1:0.000001,Western\_clawed\_frog.locus55.1:0.007558)100:0.0596  
49,

(Western\_clawed\_frog.locus36.1:0.000001,Western\_clawed\_frog.locus38.1:0.007445)100:0.045721)5  
2:0.042178,(Western\_clawed\_frog.locus63.1:0.050985,  
(Western\_clawed\_frog.locus64.1:0.007444,Western\_clawed\_frog.locus65.1:0.011182)90:0.010693)50  
:0.010517)5:0.011208,  
((Western\_clawed\_frog.locus37.1:0.113889,Western\_clawed\_frog.locus214.1:0.039692)6:0.017195,  
(Western\_clawed\_frog.locus122.1:0.033452,Western\_clawed\_frog.locus66.1:0.040901)33:0.018115)0  
:0.002562)0:0.000001,((((Western\_clawed\_frog.locus191.1:0.060526,  
(Western\_clawed\_frog.locus120.1:0.078745,  
(Western\_clawed\_frog.locus50.1:0.023916,Western\_clawed\_frog.locus60.1:0.029213)92:0.023722)18  
:0.010620)11:0.018749,((Western\_clawed\_frog.locus6.1:0.028430,  
(Western\_clawed\_frog.locus4.1:0.021241,  
(Western\_clawed\_frog.locus2.1:0.016381,Western\_clawed\_frog.locus3.1:0.003700)98:0.030511)42:0  
.009116)25:0.009095,  
((((Western\_clawed\_frog.locus18.1:0.047793,Western\_clawed\_frog.locus19.1:0.035782)47:0.013681  
,Western\_clawed\_frog.locus20.1:0.057139)30:0.010264,  
(Western\_clawed\_frog.locus16.1:0.013608,Western\_clawed\_frog.locus17.1:0.038622)50:0.013620)23  
:0.007833,  
((((Western\_clawed\_frog.locus13.1:0.016425,Western\_clawed\_frog.locus12.1:0.011917)50:0.004776  
,Western\_clawed\_frog.locus14.1:0.027283)45:0.013176,Western\_clawed\_frog.locus15.1:0.025432)29  
:0.012447,Western\_clawed\_frog.locus11.1:0.035503)22:0.003796)38:0.017288)60:0.034858)0:0.0120  
96,Western\_clawed\_frog.locus33.1:0.076827)0:0.000001,  
(Western\_clawed\_frog.locus165.1:0.025818,Western\_clawed\_frog.locus164.1:0.017697)84:0.024891)  
0:0.008477,  
((((Western\_clawed\_frog.locus156.1:0.118113,Western\_clawed\_frog.locus158.1:0.007564)82:0.02766  
2,(Western\_clawed\_frog.locus788.1:0.018621,(Western\_clawed\_frog.locus1062.1:0.007630,  
(Western\_clawed\_frog.locus332.1:0.019650,Western\_clawed\_frog.locus787.1:0.037794)47:0.000001)  
76:0.015427)75:0.027925)18:0.003656,(Western\_clawed\_frog.locus536.1:0.029357,  
(Western\_clawed\_frog.locus502.1:0.006546,Western\_clawed\_frog.locus1028.1:0.015488)37:0.011859  
)45:0.015915)22:0.009950)0:0.012773)0:0.010581)0:0.000001,  
000001,  
(Western\_clawed\_frog.locus257.1:0.011522,Western\_clawed\_frog.locus262.1:0.015733)61:0.003840)  
12:0.003750,  
(Western\_clawed\_frog.locus261.1:0.019238,Western\_clawed\_frog.locus259.1:0.000001)52:0.003801)  
3:0.000001,Western\_clawed\_frog.locus260.1:0.011679)96:0.039115,Western\_clawed\_frog.locus144.1  
:0.078200)8:0.000001,  
((Western\_clawed\_frog.locus240.1:0.024743,Western\_clawed\_frog.locus245.1:0.011236)23:0.00000  
1,  
(Western\_clawed\_frog.locus236.1:0.018808,Western\_clawed\_frog.locus250.1:0.022118)24:0.000041  
,((Western\_clawed\_frog.locus255.1:0.003692,  
(Western\_clawed\_frog.locus243.1:0.058476,Western\_clawed\_frog.locus241.1:0.007514)41:0.007764  
,Western\_clawed\_frog.locus256.1:0.014752)12:0.000001)9:0.003907,  
(Western\_clawed\_frog.locus252.1:0.018648,Western\_clawed\_frog.locus244.1:0.028116)34:0.003713)  
4:0.000001,  
(Western\_clawed\_frog.locus239.1:0.011069,Western\_clawed\_frog.locus246.1:0.007310)4:0.000001,  
(Western\_clawed\_frog.locus247.1:0.033862,  
(Western\_clawed\_frog.locus254.1:0.011078,Western\_clawed\_frog.locus251.1:0.003603)54:0.005227)  
48:0.002146)9:0.003665)40:0.007654)25:0.003793)85:0.024300,  
((((Western\_clawed\_frog.locus134.1:0.023968,Western\_clawed\_frog.locus170.1:0.032631)70:0.03031  
0,Western\_clawed\_frog.locus146.1:0.023742)28:0.007390,Western\_clawed\_frog.locus145.1:0.031574  
)77:0.042324)30:0.011808)25:0.011167,Western\_clawed\_frog.locus169.1:0.066376)15:0.007594,West  
ern\_clawed\_frog.locus248.1:0.051527)24:0.019572)0:0.003634)0:0.011053)0:0.000001,  
((Western\_clawed\_frog.locus204.1:0.000001,Western\_clawed\_frog.locus205.1:0.000001)92:0.00407  
5,Western\_clawed\_frog.locus211.1:0.019242)38:0.007418,Western\_clawed\_frog.locus206.1:0.024057  
)29:0.003730)61:0.023995,  
(Western\_clawed\_frog.locus209.1:0.007861,Western\_clawed\_frog.locus208.1:0.023549)43:0.000001)  
12:0.013350,Western\_clawed\_frog.locus210.1:0.022450)67:0.040790,  
(Western\_clawed\_frog.locus9.1:0.027084,Western\_clawed\_frog.locus8.1:0.023594)99:0.028122)3:0.  
015217,  
(Western\_clawed\_frog.locus75.1:0.039553,Western\_clawed\_frog.locus76.1:0.029931)65:0.027924,  
((((Western\_clawed\_frog.locus198.1:0.017996,  
(Western\_clawed\_frog.locus200.1:0.016055,Western\_clawed\_frog.locus199.1:0.034430)89:0.035628)  
65:0.015845,((Western\_clawed\_frog.locus78.1:0.011383,  
(Western\_clawed\_frog.locus80.1:0.000001,Western\_clawed\_frog.locus79.1:0.011467)93:0.019498,W  
estern\_clawed\_frog.locus81.1:0.014230)62:0.013286)42:0.010473,Western\_clawed\_frog.locus77.1:0  
.024014)99:0.048880,  
(Western\_clawed\_frog.locus88.1:0.020272,Western\_clawed\_frog.locus87.1:0.037971)83:0.023360)13  
:0.001790)26:0.008723,  
(Western\_clawed\_frog.locus196.1:0.001830,Western\_clawed\_frog.locus197.1:0.019882)100:0.084745  
)69:0.018396,Western\_clawed\_frog.locus280.1:0.025238)73:0.031115)27:0.011706)0:0.005441)0:0.0  
03689)0:0.005839,  
57,(Western\_clawed\_frog.locus107.1:0.050811,  
(Western\_clawed\_frog.locus106.1:0.027412,Western\_clawed\_frog.locus105.1:0.023864)57:0.018751)  
73:0.027974)6:0.005509,Western\_clawed\_frog.locus212.1:0.033569)4:0.004551,  
(Western\_clawed\_frog.locus193.1:0.053258,Western\_clawed\_frog.locus71.1:0.061487)51:0.026131)2  
:0.010873)0:0.002407,(((Western\_clawed\_frog.locus288.1:0.004014,  
(Western\_clawed\_frog.locus296.1:0.014544,

(Western\_clawed\_frog.locus294.1:0.011558,Western\_clawed\_frog.locus295.1:0.011562)68:0.006609)  
41:0.009125,Western\_clawed\_frog.locus286.1:0.022522)20:0.003768)51:0.007616,  
(Western\_clawed\_frog.locus290.1:0.015176,Western\_clawed\_frog.locus285.1:0.011259)39:0.007651  
,  
((Western\_clawed\_frog.locus291.1:0.007410,Western\_clawed\_frog.locus287.1:0.030926)62:0.007542  
,Western\_clawed\_frog.locus292.1:0.007504)57:0.015135)24:0.007588)100:0.106628,  
(Western\_clawed\_frog.locus166.1:0.141433,Western\_clawed\_frog.locus215.1:0.064028)6:0.005713)2  
:0.016516,((Western\_clawed\_frog.locus217.1:0.003758,  
((Western\_clawed\_frog.locus218.1:0.038622,Western\_clawed\_frog.locus219.1:0.003658)53:0.0036  
46,Western\_clawed\_frog.locus216.1:0.011057)49:0.003651,  
(Western\_clawed\_frog.locus222.1:0.018399,Western\_clawed\_frog.locus221.1:0.010993)75:0.003621)  
9:0.000001,Western\_clawed\_frog.locus224.1:0.003631)51:0.011012)99:0.051348,  
(Western\_clawed\_frog.locus49.1:0.044392,Western\_clawed\_frog.locus53.1:0.012345)84:0.038493)53  
:0.023174)0:0.023840)0:0.004843,Western\_clawed\_frog.locus226.1:0.043756)0:0.020052,  
(Western\_clawed\_frog.locus70.1:0.109400,Western\_clawed\_frog.locus89.1:0.037290)24:0.020220)0:  
0.011029,Western\_clawed\_frog.locus61.1:0.100679)7:0.012757)68:0.068830,Western\_clawed\_frog.lo  
cus249.1:0.006695)22:0.007466,  
(Western\_clawed\_frog.locus152.1:0.004071,Western\_clawed\_frog.locus151.1:0.012325)98:0.018095)  
49:0.064947,Western\_clawed\_frog.locus100.1:0.046786)11:0.014569,  
(Western\_clawed\_frog.locus91.1:0.005354,((Western\_clawed\_frog.locus94.1:0.000001,  
(Western\_clawed\_frog.locus95.1:0.019498,  
(Western\_clawed\_frog.locus96.1:0.011748,Western\_clawed\_frog.locus90.1:0.068951)24:0.012716)18  
:0.004168)22:0.011633,  
(Western\_clawed\_frog.locus93.1:0.012785,Western\_clawed\_frog.locus92.1:0.007702)86:0.006443)23  
:0.009541)81:0.105940)64:0.112080,  
((Western\_clawed\_frog.locus279.1:0.057289,Western\_clawed\_frog.locus98.1:0.184655)92:0.041290  
,Western\_clawed\_frog.locus202.1:0.171538,  
((Western\_clawed\_frog.locus68.1:0.032590,Western\_clawed\_frog.locus67.1:0.009629)100:0.042062,  
(Western\_clawed\_frog.locus103.1:0.047070,Western\_clawed\_frog.locus102.1:0.037835)72:0.007593  
,Western\_clawed\_frog.locus101.1:0.021663)63:0.000001)94:0.068668)48:0.034903)21:0.017783,  
((Western\_clawed\_frog.locus131.1:0.014925,  
((Western\_clawed\_frog.locus133.1:0.020130,Western\_clawed\_frog.locus130.1:0.019073)79:0.03139  
6,Western\_clawed\_frog.locus132.1:0.004532)42:0.011277,  
(Western\_clawed\_frog.locus150.1:0.007639,(Western\_clawed\_frog.locus168.1:0.022382,  
(Western\_clawed\_frog.locus148.1:0.004385,Western\_clawed\_frog.locus149.1:0.010833)59:0.007687)  
58:0.004311)53:0.014995)25:0.009286)94:0.058936,  
((Western\_clawed\_frog.locus153.1:0.032509,Western\_clawed\_frog.locus154.1:0.014419)44:0.00699  
7,Western\_clawed\_frog.locus108.1:0.027477)85:0.029611,  
((Western\_clawed\_frog.locus183.1:0.021432,  
((Western\_clawed\_frog.locus176.1:0.015350,Western\_clawed\_frog.locus173.1:0.011505)50:0.0037  
88,Western\_clawed\_frog.locus180.1:0.023899)41:0.000001,  
((Western\_clawed\_frog.locus174.1:0.015290,Western\_clawed\_frog.locus177.1:0.042052)36:0.00000  
1,((Western\_clawed\_frog.locus178.1:0.030151,(Western\_clawed\_frog.locus242.1:0.506975,  
(Western\_clawed\_frog.locus142.1:0.031662,Western\_clawed\_frog.locus172.1:0.042882)66:0.022553)  
43:0.022376)1:0.004357,(Western\_clawed\_frog.locus141.1:0.030843,  
(Western\_clawed\_frog.locus139.1:0.008575,Western\_clawed\_frog.locus175.1:0.017242)51:0.005728)  
25:0.000001)1:0.011459,Western\_clawed\_frog.locus140.1:0.011599)0:0.007660)0:0.003790,  
(Western\_clawed\_frog.locus129.1:0.027012,Western\_clawed\_frog.locus138.1:0.007574)10:0.003798)  
10:0.007818)15:0.009285,  
(Western\_clawed\_frog.locus184.1:0.026101,Western\_clawed\_frog.locus126.1:0.013126)34:0.007706)  
29:0.012167)65:0.038125,Western\_clawed\_frog.locus97.1:0.058497)62:0.020485)74:0.032004)55:0.0  
36477,((Western\_clawed\_frog.locus268.1:0.010023,  
(Western\_clawed\_frog.locus265.1:0.000001,Western\_clawed\_frog.locus266.1:0.010938)83:0.015534)  
100:0.150819,Western\_clawed\_frog.locus283.1:0.221865)34:0.011431)34:0.010987)42:0.039437)97:0  
.247874)99:0.223233)17:0.041134,  
d.locus97.1:0.004286)100:0.360839,  
((Anole\_lizard.locus99.1:0.339236,Anole\_lizard.locus141.1:0.308064)12:0.068217,  
(Anole\_lizard.locus145.1:0.343417,Anole\_lizard.locus148.1:0.516764)8:0.035970)1:0.033150,  
(Anole\_lizard.locus180.1:0.325576,Anole\_lizard.locus179.1:0.228686)88:0.066614,  
(Anole\_lizard.locus178.1:0.000001,Anole\_lizard.locus177.1:0.007656)100:0.238505)96:0.113602)1  
0:0.025109,Anole\_lizard.locus127.1:0.325637)7:0.043231,  
rd.locus147.1:0.261080)31:0.070850,  
(Anole\_lizard.locus152.1:0.351847,Anole\_lizard.locus144.1:0.283116)29:0.038342)4:0.020862,  
((Anole\_lizard.locus109.1:0.296429,Anole\_lizard.locus150.1:0.288706)18:0.037626,  
(Anole\_lizard.locus123.1:0.007362,Anole\_lizard.locus125.1:0.018624)100:0.310929,  
(Anole\_lizard.locus108.1:0.072138,Anole\_lizard.locus106.1:0.152194)100:0.181499)36:0.043015)1  
5:0.028553,((((Anole\_lizard.locus107.1:0.502336,Anole\_lizard.locus120.1:0.207793)61:0.079062,  
(Anole\_lizard.locus117.1:0.045943,((Anole\_lizard.locus124.1:0.035411,  
(Anole\_lizard.locus113.1:0.043647,Anole\_lizard.locus112.1:0.024957)99:0.096220)29:0.006902,An  
ole\_lizard.locus119.1:0.106101)35:0.024931,Anole\_lizard.locus115.1:0.039684)31:0.027050)100:0  
.234977)23:0.028852,Anole\_lizard.locus135.1:0.624369)13:0.038079,  
(Anole\_lizard.locus114.1:0.257841,(Anole\_lizard.locus111.1:0.078238,  
(Anole\_lizard.locus102.1:0.000001,(Anole\_lizard.locus103.1:0.012958,  
(Anole\_lizard.locus101.1:0.131009,Anole\_lizard.locus104.1:0.002600)57:0.049679)21:0.004923,  
(Anole\_lizard.locus100.1:0.036940,Anole\_lizard.locus105.1:0.006672)52:0.006519)30:0.007865)73

:0.071119)100:0.185244)15:0.033536)0:0.004716)14:0.018880,Anole\_lizard.locus155.1:0.297450)4:  
0.030862)4:0.027271)0:0.028969)0:0.028688)1:0.026327)5:0.019777,  
(((Anole\_lizard.locus175.1:0.390752,  
(((Anole\_lizard.locus184.1:0.023865,Anole\_lizard.locus183.1:0.039406)100:0.204346,Anole\_lizar  
d.locus204.1:0.220275)99:0.090088,  
(Anole\_lizard.locus211.1:0.042751,Anole\_lizard.locus37.1:0.047370)100:0.224454)81:0.088439)52  
:0.067175,(Anole\_lizard.locus143.1:0.457415,(Anole\_lizard.locus142.1:0.421066,  
(Anole\_lizard.locus129.1:0.769751,Anole\_lizard.locus130.1:0.286335)72:0.078855)17:0.061010)1:  
0.022337)1:0.028311,  
((Anole\_lizard.locus140.1:0.313686,Anole\_lizard.locus137.1:0.415351)8:0.037819,Anole\_lizard.l  
ocus139.1:0.523882)0:0.009375)1:0.020823)73:0.104260,  
(((Mouse.locus114.1:0.018708,Mouse.locus113.1:0.013617)100:0.066191,  
(((Mouse.locus106.1:0.003965,  
(Mouse.locus110.1:0.000001,Mouse.locus108.1:0.000001)78:0.003830)100:0.033279,Mouse.locus105.  
1:0.075958)89:0.033868,(Mouse.locus117.1:0.069728,  
(Mouse.locus116.1:0.086870,Mouse.locus115.1:0.076205)59:0.030390)94:0.053996)32:0.008661)35:0.  
012958,(Mouse.locus111.1:0.058146,Mouse.locus112.1:0.040682)88:0.021330)100:0.434428,  
(((Mouse.locus221.1:0.024265,Mouse.locus220.1:0.057659)47:0.007368,  
(Mouse.locus223.1:0.011967,Mouse.locus222.1:0.003603)98:0.025578)100:0.526036,  
(((Mouse.locus93.1:0.055922,Mouse.locus92.1:0.073776)56:0.007380,Mouse.locus317.1:0.073817)10  
0:0.305841,(((Mouse.locus348.1:0.095582,(Mouse.locus346.1:0.015290,  
(Mouse.locus347.1:0.027863,Mouse.locus345.1:0.048713)30:0.003624)100:0.204336)100:0.219377,  
((((Mouse.locus246.1:0.018410,  
(Mouse.locus248.1:0.010919,Mouse.locus244.1:0.000001)100:0.022257)82:0.012458,Mouse.locus224.  
1:0.032134)100:0.066560,(Mouse.locus237.1:0.048286,(Mouse.locus232.1:0.039536,  
(Mouse.locus227.1:0.076949,  
(Mouse.locus231.1:0.023561,Mouse.locus229.1:0.003265)97:0.017015)76:0.018831)46:0.009232,  
(Mouse.locus234.1:0.053622,  
(Mouse.locus243.1:0.028886,Mouse.locus239.1:0.048175)65:0.009173)39:0.007205)20:0.010035)94:0.  
.047398)63:0.027309,Mouse.locus403.1:0.094346)100:0.100232,(Mouse.locus462.1:0.052577,  
(((Mouse.locus409.1:0.040572,Mouse.locus448.1:0.088414)37:0.004647,  
(Mouse.locus413.1:0.073854,  
(Mouse.locus452.1:0.046343,Mouse.locus453.1:0.021967)76:0.019607,Mouse.locus410.1:0.068802)2  
9:0.005099)18:0.004459)10:0.005093,  
(Mouse.locus440.1:0.045369,Mouse.locus434.1:0.042723)58:0.012661,  
(((Mouse.locus415.1:0.046680,Mouse.locus432.1:0.079810)16:0.000001,  
(Mouse.locus421.1:0.026734,  
(Mouse.locus430.1:0.028150,Mouse.locus426.1:0.031069)30:0.003192)12:0.000001,Mouse.locus419.1  
:0.022121)35:0.004394)53:0.008875,Mouse.locus436.1:0.031309)60:0.010979)45:0.013675)36:0.0082  
66)93:0.040602,(Mouse.locus456.1:0.154916,  
(Mouse.locus467.1:0.014181,Mouse.locus465.1:0.052975)100:0.060804,Mouse.locus458.1:0.082653)  
71:0.018833)81:0.023342)99:0.069619)99:0.065982,Mouse.locus90.1:0.259791)55:0.037555)99:0.098  
998,(Mouse.locus494.1:0.196181,  
(((Mouse.locus218.1:0.011984,Mouse.locus120.1:0.026489)100:0.068966,  
(((Mouse.locus155.1:0.000001,Mouse.locus181.1:0.003667)100:0.007430,Mouse.locus214.1:0.01894  
8)89:0.015840,(Mouse.locus191.1:0.000001,Mouse.locus140.1:0.003673)100:0.034042)86:0.010730,  
(((Mouse.locus159.1:0.007437,Mouse.locus126.1:0.003712)62:0.007437,  
(Mouse.locus176.1:0.000001,Mouse.locus208.1:0.003789)96:0.010944,Mouse.locus150.1:0.007293)9  
6:0.011837)44:0.000001,  
(Mouse.locus133.1:0.000001,Mouse.locus183.1:0.007416)78:0.003703)77:0.007491,  
(Mouse.locus122.1:0.000001,  
(((Mouse.locus134.1:0.026698,Mouse.locus185.1:0.003774)92:0.018679,  
(((Mouse.locus136.1:0.003712,Mouse.locus187.1:0.003722)73:0.007461,Mouse.locus163.1:0.01517  
7)19:0.003735,(Mouse.locus124.1:0.000001,((Mouse.locus128.1:0.007620,  
(Mouse.locus151.1:0.003788,Mouse.locus177.1:0.000001)58:0.000001,  
(Mouse.locus210.1:0.000001,Mouse.locus216.1:0.007630)89:0.019110)29:0.003814)24:0.007677,  
(Mouse.locus198.1:0.000001,Mouse.locus206.1:0.000001)36:0.000001,Mouse.locus174.1:0.000001)8  
0:0.003757)8:0.003772,  
(Mouse.locus170.1:0.003768,Mouse.locus143.1:0.000001)57:0.000001,Mouse.locus161.1:0.015172)6  
1:0.007621)11:0.000001)33:0.003773,  
(Mouse.locus153.1:0.003734,Mouse.locus212.1:0.003767)42:0.000001,Mouse.locus130.1:0.003736)9  
3:0.038030)13:0.000001)55:0.022826,  
(Mouse.locus192.1:0.000001,Mouse.locus200.1:0.000001)100:0.018863)57:0.018846,Mouse.locus157.  
1:0.003691)28:0.007444)9:0.000001,  
(Mouse.locus172.1:0.003717,Mouse.locus145.1:0.003709)64:0.003714)0:0.000001)31:0.007461)35:0.  
004109)82:0.041050)100:0.118805,  
((((Mouse.locus481.1:0.014589,Mouse.locus484.1:0.023490)92:0.029505,Mouse.locus489.1:0.0057  
05)61:0.011978,Mouse.locus487.1:0.022852)93:0.020107,Mouse.locus486.1:0.032788)93:0.022747,  
(Mouse.locus469.1:0.007992,Mouse.locus472.1:0.017230)100:0.058832)100:0.056682,  
(Mouse.locus477.1:0.051786,  
(Mouse.locus474.1:0.016094,Mouse.locus476.1:0.004454)53:0.004520)99:0.067901)100:0.121367)90:  
0.058943)45:0.026381)20:0.014175,((((((Mouse.locus391.1:0.041983,  
(Mouse.locus63.1:0.021273,Mouse.locus508.1:0.015680)79:0.011172)46:0.009156,Mouse.locus389.1:  
0.064124)82:0.021524,  
(Mouse.locus755.1:0.000001,Mouse.locus338.1:0.000001)100:0.025059,Mouse.locus87.1:0.260868)5  
8:0.021489)36:0.007540,(Mouse.locus354.1:0.034341,  
(Mouse.locus352.1:0.014003,Mouse.locus353.1:0.020127)46:0.007460,Mouse.locus351.1:0.021525)7  
0:0.008525)96:0.021956)44:0.007882,Mouse.locus17.1:0.063960)60:0.048004,  
(Mouse.locus82.1:0.030570,Mouse.locus85.1:0.040966)54:0.010514,(Mouse.locus77.1:0.056020,

((Mouse.locus74.1:0.011483,  
(Mouse.locus75.1:0.027475,Mouse.locus78.1:0.011375)66:0.003754)71:0.000001,Mouse.locus79.1:0.  
034317)76:0.015295,Mouse.locus83.1:0.050776)31:0.003748)61:0.005178,Mouse.locus80.1:0.038597)  
63:0.010635)63:0.014327)32:0.003841,Mouse.locus86.1:0.085407)100:0.210888,  
(Mouse.locus302.1:0.274040,((Mouse.locus307.1:0.041456,  
(Mouse.locus309.1:0.021916,Mouse.locus311.1:0.056121)50:0.019094)66:0.027899,Mouse.locus305.1  
:0.032260)100:0.074594,(Mouse.locus298.1:0.077607,Mouse.locus255.1:0.067821)32:0.004418,  
(((Mouse.locus261.1:0.045454,Mouse.locus264.1:0.037360)51:0.009992,Mouse.locus280.1:0.046685  
)98:0.023016,(Mouse.locus276.1:0.075730,  
(Mouse.locus289.1:0.061097,Mouse.locus271.1:0.048714)57:0.012337)64:0.015460,Mouse.locus268.1  
:0.027035)49:0.009352)37:0.004029,Mouse.locus286.1:0.096061)39:0.005563)99:0.082237)100:0.097  
728)57:0.023212,Mouse.locus254.1:0.208916)77:0.077973)23:0.015433)60:0.043192,  
(Mouse.locus758.1:0.000001,Mouse.locus493.1:0.000001)100:0.276503)65:0.029502)100:0.154740)98  
:0.167077)43:0.058356,(Anole\_lizard.locus190.1:0.175740,  
(Anole\_lizard.locus187.1:0.101379,Anole\_lizard.locus188.1:0.096281)53:0.021527,Anole\_lizard.  
locus186.1:0.171463)84:0.039386)100:0.231265)34:0.039498)76:0.082632,  
(((Western\_clawed\_frog.locus942.1:0.307885,  
(((Western\_clawed\_frog.locus1005.1:0.006210,Western\_clawed\_frog.locus1006.1:0.005403)100:0.11  
1258,  
(Western\_clawed\_frog.locus1003.1:0.019977,Western\_clawed\_frog.locus1004.1:0.018452)100:0.0880  
68)100:0.176312,(((Western\_clawed\_frog.locus1014.1:0.009395,  
(Western\_clawed\_frog.locus997.1:0.004084,  
(Western\_clawed\_frog.locus1009.1:0.014939,Western\_clawed\_frog.locus1007.1:0.000001)58:0.00000  
1)50:0.005526)92:0.020584,Western\_clawed\_frog.locus908.1:0.041298)90:0.035849,Western\_clawed  
frog.locus1011.1:0.012697)100:0.304228,Western\_clawed\_frog.locus1000.1:0.259963)46:0.038486,W  
estern\_clawed\_frog.locus1001.1:0.200561)58:0.051866)83:0.070607)100:0.159337,  
((((((((Caecillan.locus40424.1:0.000001,Caecillan.locus40426.1:0.003841)100:0.033109,  
((Caecillan.locus40565.1:0.011927,  
(((Caecillan.locus40573.1:0.019941,Caecillan.locus40574.1:0.023960)5:0.000001,  
((Caecillan.locus40585.1:0.015954,Caecillan.locus40568.1:0.020029)16:0.000001,  
((Caecillan.locus40580.1:0.036476,(Caecillan.locus40572.1:0.011969,  
(Caecillan.locus40581.1:0.015964,Caecillan.locus40571.1:0.007931)61:0.015966)28:0.000001,Caec  
illan.locus40584.1:0.020694)44:0.003990)21:0.003948,  
(Caecillan.locus40569.1:0.020122,Caecillan.locus40579.1:0.003898)55:0.012053)6:0.000001)6:0.0  
03977)3:0.003928,(Caecillan.locus40582.1:0.024188,  
(Caecillan.locus40566.1:0.024107,Caecillan.locus40578.1:0.016067)29:0.003986)21:0.004108)30:0  
.000001,Caecillan.locus40570.1:0.015993)61:0.004052)97:0.031284,Caecillan.locus40395.1:0.0595  
09)27:0.008376)29:0.007419,Caecillan.locus40454.1:0.040521)74:0.035626,  
(Caecillan.locus40586.1:0.078883,  
(((Caecillan.locus40355.1:0.030444,Caecillan.locus40354.1:0.046278)93:0.021410,Caecillan.locu  
s40349.1:0.102997)35:0.006726,Caecillan.locus40294.1:0.067659)70:0.024041)19:0.006659)22:0.02  
6999,(Caecillan.locus40288.1:0.145213,  
((Caecillan.locus40460.1:0.012225,Caecillan.locus40458.1:0.015206)90:0.015774,Caecillan.locus  
40462.1:0.028270)79:0.039904)17:0.005970)28:0.019012,  
((((Caecillan.locus40464.1:0.070740,Caecillan.locus40463.1:0.056849)34:0.011661,Caecillan.lo  
cus40335.1:0.035939)33:0.004560,Caecillan.locus40455.1:0.040098)68:0.019645,Caecillan.locus40  
291.1:0.041286)22:0.007703,(Caecillan.locus40466.1:0.090410,(Caecillan.locus40334.1:0.110741,  
(Caecillan.locus40338.1:0.068117,  
(((Caecillan.locus40336.1:0.014151,Caecillan.locus40337.1:0.013325)87:0.019727,  
(Caecillan.locus40448.1:0.090674,Caecillan.locus40387.1:0.032231)16:0.001847)17:0.005929,  
((Caecillan.locus40450.1:0.040576,Caecillan.locus40390.1:0.032203)49:0.015672,Caecillan.locus  
40385.1:0.031679)36:0.004489)10:0.010213)10:0.003969,(Caecillan.locus40363.1:0.050731,  
(Caecillan.locus40362.1:0.003699,Caecillan.locus40361.1:0.011861)100:0.035397)35:0.010941,  
(Caecillan.locus40339.1:0.024096,(Caecillan.locus40364.1:0.010514,  
(Caecillan.locus40371.1:0.000001,Caecillan.locus40365.1:0.007820)100:0.020930)92:0.026602)41:  
0.008787)15:0.003988)83:0.030039)23:0.008814)15:0.019730)9:0.011749)13:0.027617,Caecillan.loc  
us40356.1:0.103248)95:0.079559,((((Caecillan.locus40509.1:0.059319,  
(Caecillan.locus40508.1:0.028566,Caecillan.locus40513.1:0.047672)71:0.018692)40:0.010992,Caec  
illan.locus40511.1:0.027012)57:0.039531,Caecillan.locus40506.1:0.075914)100:0.147302,Caecilla  
n.locus40514.1:0.241018)9:0.002554,Caecillan.locus40492.1:0.250303)9:0.021532,  
((Caecillan.locus36723.1:0.140553,(Caecillan.locus40541.1:0.071781,  
(Caecillan.locus40435.1:0.079209,(Caecillan.locus40434.1:0.063306,  
(Caecillan.locus36727.1:0.014794,Caecillan.locus36726.1:0.020453)76:0.020480)81:0.026899)42:0  
.017211,Caecillan.locus36728.1:0.053294)91:0.051847)76:0.040054)44:0.020558,  
((Caecillan.locus36921.1:0.003891,Caecillan.locus36920.1:0.025039)99:0.085953,  
((((((((Caecillan.locus40408.1:0.000001,  
(Caecillan.locus40416.1:0.011529,Caecillan.locus40407.1:0.052786)49:0.011554)98:0.058484,Caec  
illan.locus40313.1:0.070283)10:0.006091,Caecillan.locus40323.1:0.015569)3:0.003853,  
(Caecillan.locus40403.1:0.043993,(Caecillan.locus40404.1:0.062667,  
(Caecillan.locus40376.1:0.000001,  
(Caecillan.locus40377.1:0.000001,Caecillan.locus40369.1:0.008191)82:0.004021)95:0.004031,  
(((Caecillan.locus40384.1:0.000001,Caecillan.locus40370.1:0.003893)77:0.007969,Caecillan.locu  
s40379.1:0.003700)84:0.027931,Caecillan.locus40382.1:0.003938)34:0.004001)100:0.074413)21:0.0  
16593,Caecillan.locus40402.1:0.085353)4:0.004670)6:0.007616)1:0.000001,  
((Caecillan.locus40481.1:0.037402,Caecillan.locus40397.1:0.047317)88:0.015878,Caecillan.locus  
40325.1:0.034364)81:0.017295)1:0.008020,(Caecillan.locus40307.1:0.000001,  
(Caecillan.locus40311.1:0.000001,  
((Caecillan.locus40310.1:0.011345,Caecillan.locus40308.1:0.003741)34:0.000001,Caecillan.locus  
40309.1:0.003770)15:0.000001)65:0.003735)100:0.061674,Caecillan.locus40315.1:0.039198)33:0.00

9804)0:0.004883,((Caecillan.locus40406.1:0.087064,((Caecillan.locus36943.1:0.027699,  
((Caecillan.locus40477.1:0.039324,Caecillan.locus40480.1:0.038686)94:0.046810,  
(((Caecillan.locus36951.1:0.003807,Caecillan.locus36744.1:0.000001)100:0.039500,  
(Caecillan.locus36738.1:0.070784,Caecillan.locus36949.1:0.005256)71:0.028948)55:0.008766,  
(Caecillan.locus36950.1:0.003856,  
(Caecillan.locus36743.1:0.003858,Caecillan.locus36734.1:0.003863)63:0.000001)96:0.024452)12:0  
.000001,((Caecillan.locus36944.1:0.044253,  
(Caecillan.locus36736.1:0.003869,Caecillan.locus36732.1:0.011594)58:0.003855)28:0.003895,  
((Caecillan.locus36948.1:0.000001,Caecillan.locus36947.1:0.003940,  
(Caecillan.locus36946.1:0.003883,Caecillan.locus36735.1:0.007772)73:0.000001)98:0.015725)84:0  
.019943,Caecillan.locus36733.1:0.019570)8:0.000001)54:0.007641)60:0.011820)10:0.004026)8:0.00  
3770,  
(Caecillan.locus36740.1:0.003829,Caecillan.locus36742.1:0.000001)100:0.027682)8:0.015709)1:0.  
000001,  
(((Caecillan.locus40401.1:0.064117,Caecillan.locus40317.1:0.030244)71:0.022527,Caecillan.locu  
s40318.1:0.055039)30:0.012470,  
((Caecillan.locus40473.1:0.027914,Caecillan.locus40470.1:0.011596)100:0.023795,Caecillan.locu  
s40476.1:0.060901)55:0.019831)7:0.004277)0:0.003839)1:0.000001,Caecillan.locus40321.1:0.06072  
6)3:0.014678,((Caecillan.locus40280.1:0.011366,Caecillan.locus40278.1:0.004079)100:0.122001,  
((Caecillan.locus40281.1:0.077970,Caecillan.locus40306.1:0.074922,  
(Caecillan.locus40322.1:0.060072,Caecillan.locus40314.1:0.029118)98:0.034973)79:0.019930)73:0  
.020124,  
(Caecillan.locus40283.1:0.049636,Caecillan.locus40348.1:0.070624)57:0.025867)15:0.017739)4:0.  
004816,  
(Caecillan.locus40429.1:0.081130,Caecillan.locus40312.1:0.113826)9:0.006376)26:0.013958)6:0.0  
04746,Caecillan.locus40400.1:0.057073)40:0.019993,Caecillan.locus40286.1:0.056408)81:0.038045  
,((Caecillan.locus36963.1:0.017014,Caecillan.locus36960.1:0.059628)84:0.028870,  
(Caecillan.locus36959.1:0.051946,Caecillan.locus36962.1:0.031251)32:0.000954)32:0.008252,Cae  
cillan.locus40302.1:0.056343)90:0.037488)30:0.011696,(((Caecillan.locus36915.1:0.039718,  
((Caecillan.locus36909.1:0.014379,Caecillan.locus36910.1:0.015258)77:0.015084,  
(Caecillan.locus36911.1:0.030307,Caecillan.locus36912.1:0.040446)53:0.011909)23:0.005368)7:0.  
004563,Caecillan.locus36913.1:0.063906)4:0.000001,Caecillan.locus36907.1:0.039516)29:0.004351  
,(Caecillan.locus36908.1:0.044960,Caecillan.locus36955.1:0.043513,  
((Caecillan.locus40485.1:0.002315,Caecillan.locus40486.1:0.021247)100:0.045439,  
(Caecillan.locus36954.1:0.048094,Caecillan.locus40412.1:0.080140)29:0.000001)12:0.004376)28:0  
.000001)36:0.004401)60:0.015429)44:0.028054,  
(((Caecillan.locus40499.1:0.010411,Caecillan.locus40498.1:0.040696)79:0.024749,  
(Caecillan.locus40494.1:0.006825,  
((Caecillan.locus40504.1:0.013855,Caecillan.locus40497.1:0.008975)57:0.011578,Caecillan.locus  
40502.1:0.021703)73:0.005897)70:0.023312)100:0.300687,  
(Caecillan.locus40443.1:0.098400,Caecillan.locus40431.1:0.065360)86:0.035036)19:0.036165)8:0.  
019561,((Caecillan.locus40410.1:0.083222,Caecillan.locus40284.1:0.106272)46:0.017329,  
((((Caecillan.locus40428.1:0.031459,  
(Caecillan.locus40421.1:0.000001,Caecillan.locus40422.1:0.000001)99:0.017227)100:0.023643,Cae  
cillan.locus40420.1:0.026380)98:0.036391,  
((Caecillan.locus40409.1:0.049775,Caecillan.locus40417.1:0.037854)84:0.020941,  
(Caecillan.locus40418.1:0.019364,Caecillan.locus40415.1:0.027470)100:0.027157)56:0.004457)98:  
0.052686,Caecillan.locus40413.1:0.099718)46:0.013637,Caecillan.locus40414.1:0.086902)71:0.029  
147)59:0.017812)12:0.019256,(Caecillan.locus40341.1:0.123824,  
((((((((Caecillan.locus40533.1:0.009077,Caecillan.locus40531.1:0.000001)95:0.020747,  
((Caecillan.locus40540.1:0.058523,Caecillan.locus40534.1:0.015201)70:0.012140,  
(Caecillan.locus40537.1:0.004046,Caecillan.locus40539.1:0.008102)65:0.000001,Caecillan.locus  
40538.1:0.016316)86:0.018224)17:0.007803)27:0.011021,  
(Caecillan.locus40520.1:0.024271,Caecillan.locus40527.1:0.008077)45:0.008206)11:0.004016,  
(Caecillan.locus40528.1:0.012233,Caecillan.locus40530.1:0.020111)99:0.020387)18:0.008526,Cae  
cillan.locus40522.1:0.020522)31:0.010947,Caecillan.locus40519.1:0.015650)16:0.014906,  
(Caecillan.locus40526.1:0.058523,  
(Caecillan.locus40517.1:0.029195,Caecillan.locus40518.1:0.033310)55:0.010204)61:0.008078)14:0  
.007970,(Caecillan.locus40524.1:0.054633,  
(Caecillan.locus40523.1:0.020395,Caecillan.locus40525.1:0.016531)84:0.012646)22:0.004278)57:0  
.027032,(Caecillan.locus40433.1:0.089590,(Caecillan.locus40274.1:0.108407,  
(Caecillan.locus40276.1:0.033178,Caecillan.locus40432.1:0.078336)52:0.015285)9:0.003041)35:0.  
020239)74:0.030844)98:0.053078)5:0.008361,((Caecillan.locus36939.1:0.043026,  
(Caecillan.locus36940.1:0.011566,Caecillan.locus36942.1:0.011463)100:0.039465)10:0.000001,  
((Caecillan.locus36937.1:0.074299,Caecillan.locus36860.1:0.034334)30:0.003680,  
(Caecillan.locus36862.1:0.008915,Caecillan.locus36730.1:0.017752)100:0.034737)39:0.008765)36:  
0.017502,(Caecillan.locus40345.1:0.109234,  
((Caecillan.locus36931.1:0.007582,Caecillan.locus36928.1:0.000001)100:0.043402,  
((((Caecillan.locus40438.1:0.016602,Caecillan.locus40440.1:0.034052)99:0.034443,Caecillan.loc  
us36934.1:0.036044)25:0.003985,Caecillan.locus36926.1:0.042582)53:0.005166,Caecillan.locus403  
44.1:0.043140)27:0.003794)44:0.011155,  
(Caecillan.locus40343.1:0.027106,Caecillan.locus40441.1:0.038606)97:0.028096)63:0.025552)22:0  
.001349)94:0.085548)5:0.022386,Caecillan.locus40342.1:0.173934)5:0.018039)2:0.019223)8:0.0218  
32)10:0.010931)18:0.018638,((Caecillan.locus40332.1:0.142089,  
(Caecillan.locus40296.1:0.098056,Caecillan.locus40393.1:0.093649)58:0.021709)9:0.007021,  
((Caecillan.locus40331.1:0.025792,Caecillan.locus40467.1:0.038801)88:0.019480,Caecillan.locus  
40394.1:0.066089)98:0.044490)18:0.010929,  
((Caecillan.locus40487.1:0.067735,Caecillan.locus40489.1:0.062343)78:0.026589,  
(Caecillan.locus40491.1:0.063775,Caecillan.locus40297.1:0.073735)68:0.017966)52:0.022598,

((Caecillan.locus40360.1:0.079562,(Caecillan.locus40446.1:0.104826,  
(Caecillan.locus40303.1:0.055844,Caecillan.locus40490.1:0.057841)61:0.016631)50:0.006813)54:0  
.007097,(((Caecillan.locus40447.1:0.035709,Caecillan.locus40328.1:0.081653)100:0.055444,  
(Caecillan.locus40327.1:0.110144,Caecillan.locus40392.1:0.016261)56:0.013624)54:0.008344,  
(Caecillan.locus40469.1:0.045732,Caecillan.locus40329.1:0.015730)100:0.071596)35:0.011813)62:  
0.033151)25:0.013070)97:0.126369)56:0.093860)40:0.041366,Western\_clawed\_frog.locus890.1:0.660  
572)48:0.066650)28:0.053493)35:0.048745)25:0.040627,  
(((Western\_clawed\_frog.locus977.1:0.046922,Western\_clawed\_frog.locus978.1:0.038040)85:0.04779  
5,((Western\_clawed\_frog.locus1023.1:0.009951,(Western\_clawed\_frog.locus1021.1:0.007336,  
(Western\_clawed\_frog.locus1017.1:0.007733,  
(Western\_clawed\_frog.locus1022.1:0.011485,Western\_clawed\_frog.locus1019.1:0.003737)62:0.01119  
5)27:0.003852,  
(Western\_clawed\_frog.locus1018.1:0.007728,Western\_clawed\_frog.locus1020.1:0.000001)67:0.00369  
2)38:0.003732)83:0.016470)100:0.049370,(((Western\_clawed\_frog.locus964.1:0.026493,  
(Western\_clawed\_frog.locus973.1:0.018642,  
(Western\_clawed\_frog.locus976.1:0.050047,Western\_clawed\_frog.locus952.1:0.012746)32:0.005707)  
5:0.004525,((Western\_clawed\_frog.locus959.1:0.023398,  
((Western\_clawed\_frog.locus953.1:0.030376,Western\_clawed\_frog.locus971.1:0.026594)12:0.00000  
1,Western\_clawed\_frog.locus975.1:0.014967)10:0.003727,Western\_clawed\_frog.locus969.1:0.007482  
)10:0.003814)1:0.003666,Western\_clawed\_frog.locus972.1:0.034047)1:0.000001,  
(Western\_clawed\_frog.locus957.1:0.015260,(Western\_clawed\_frog.locus967.1:0.027206,  
(Western\_clawed\_frog.locus963.1:0.003856,  
(Western\_clawed\_frog.locus965.1:0.019225,Western\_clawed\_frog.locus966.1:0.003464)97:0.015223)  
62:0.003778)33:0.011396)4:0.007375,Western\_clawed\_frog.locus960.1:0.011206)0:0.000001)0:0.003  
728)0:0.000001)0:0.003736,(Western\_clawed\_frog.locus974.1:0.018934,  
(Western\_clawed\_frog.locus961.1:0.026559,  
(Western\_clawed\_frog.locus950.1:0.011393,Western\_clawed\_frog.locus962.1:0.022614)34:0.007636  
,Western\_clawed\_frog.locus951.1:0.026353)7:0.003603)5:0.007661,Western\_clawed\_frog.locus968.1  
:0.015161)5:0.007457)2:0.003703)54:0.020103,  
((Western\_clawed\_frog.locus948.1:0.020883,Western\_clawed\_frog.locus955.1:0.044566)95:0.039138  
,Western\_clawed\_frog.locus958.1:0.031646)84:0.022275)98:0.064900,Western\_clawed\_frog.locus979  
.1:0.062400)55:0.018389)92:0.097900)100:0.404190,Western\_clawed\_frog.locus875.1:0.543430)33:0  
.058461)17:0.029603,(Caecillan.locus36917.1:0.438444,  
(Western\_clawed\_frog.locus531.1:0.285383,Caecillan.locus10029.1:0.245922)100:0.253702)32:0.05  
5225)52:0.079037)5:0.026353)5:0.024047,  
(Western\_clawed\_frog.locus417.1:0.031794,Western\_clawed\_frog.locus416.1:0.013340)100:0.55101  
8,  
(Anole\_lizard.locus203.1:0.988059,Western\_clawed\_frog.locus499.1:0.604860)38:0.147927)22:0.14  
5348)10:0.025497)92:0.271844)52:0.070673,(((Elephant\_shark.locus27.1:0.031627,Small-  
eyed\_rabbitfish.locus110.1:0.125245)96:0.151032,((Smalltooth\_sawfish.locus19.1:0.052890,  
(Little\_skate.locus49.1:0.019806,Thorny\_skate.locus23.1:0.013179)100:0.151599)79:0.043388,  
(Great\_white\_shark.locus11.1:0.055465,  
(Brownbanded\_bambooshark.locus520.1:0.026139,Whale\_shark.locus98.1:0.004686)100:0.057501)51:0  
.011648,Cloudy\_catshark.locus79.1:0.070956)55:0.025209)93:0.087479)100:0.136137,  
(((Reedfish.locus27372.1:0.134877,((Spotted\_gar.locus169.1:0.066913,  
(Zebrafish.locus541.1:0.239114,Japanese\_eel.locus277.1:0.166619)100:0.199622)100:0.111947,Ste  
rlet.locus180.1:0.077158)36:0.020064)95:0.105936,  
(((Mouse.locus35.1:0.003613,Mouse.locus41.1:0.004048)100:0.045422,  
(Mouse.locus26.1:0.054462,(Mouse.locus33.1:0.045207,  
(Mouse.locus23.1:0.011444,Mouse.locus22.1:0.007797)76:0.006648)18:0.012154,Mouse.locus28.1:0.  
023974)44:0.017100)24:0.000001)100:0.366803,Anole\_lizard.locus40.1:0.224276)99:0.088675,Caeci  
llan.locus34702.1:0.129554)89:0.065890,Western\_clawed\_frog.locus568.1:0.199678)100:0.209424)4  
5:0.039618,Coelacanth.locus28.1:0.212125)88:0.126574)100:0.389686)98:0.718490)73:0.023310,  
(Spotted\_gar.locus196.1:0.021787,Zebrafish.locus111.1:0.092191)93:0.027909,  
(Reedfish.locus72574.1:0.047537,(Coelacanth.locus225.1:0.060024,  
(Sterlet.locus167.1:0.000001,Sterlet.locus136.1:0.000001)100:0.035881)50:0.017200)33:0.010878  
)63:0.022592)67:0.012170,  
(Western\_clawed\_frog.locus333.1:0.052560,Caecillan.locus19184.1:0.039687)56:0.015518)70:0.015  
191)100:0.034683,Mouse.locus398.1:0.000001):0.000001,NM\_013803.3.mouse.CaSR:0.000001);
